# Supplementary material for: ChIP-Hub: an Integrative Platform for Exploring Plant Regulome
Source: Research Square preprint supplement (doi:10.21203/rs.3.rs-812424/v1), 2021-08-26
Supplement: Supplementary file 1 [file 9254047b66607a021c88904f.xlsx]

## Sheet: Table S1
Supplementary Table 1: Number of identified peaks in all experiments.
Genome	Histone related	DNA-binding protein	Open chromatin	Total
﻿aegilops_tauschii	58681	0	157806	216487
arabidopsis_lyrata	54171	8184	0	62355
arabidopsis_thaliana	9389286	5682273	6150670	21222229
arabis_alpina	10607	461	0	11068
beta_vulgaris	1376	0	0	1376
brachypodium_distachyon	151509	10033	465488	627030
brassica_napus	1770962	155920	0	1926882
brassica_oleracea	71984	0	0	71984
brassica_rapa	428429	0	0	428429
carica_papaya	46708	0	39917	86625
chlamydomonas_reinhardtii	208896	6368	0	215264
citrullus_lanatus	39026	0	133306	172332
cucumis_melo	466496	0	269039	735535
cucumis_sativus	105892	987	77346	184225
eucalyptus_grandis	92143	7484	309415	409042
eutrema_salsugineum	71733	0	5600	77333
fragaria_vesca	18157	0	116811	134968
glycine_max	337117	452248	86416	875781
gossypium_arboreum	72930	2648	29643	105221
gossypium_barbadense	148332	0	41554	189886
gossypium_hirsutum	251490	5710	166799	423999
gossypium_raimondii	55486	2214	18920	76620
hordeum_vulgare	202344	16134	35218	253696
lotus_japonicus	0	245	0	245
malus_domestica	851213	0	111264	962477
medicago_truncatula	132065	0	113458	245523
musa_acuminata	518191	0	0	518191
oryza_glaberrima	3885	0	0	3885
oryza_sativa	3278493	123949	1132035	4534477
phaseolus_vulgaris	23479	0	52891	76370
physcomitrella_patens	245084	7790	0	252874
populus_trichocarpa	58875	81253	380584	520712
prunus_persica	123466	7425	158264	289155
pyrus_bretschneideri	165118	0	0	165118
rosa_chinensis	30421	0	0	30421
setaria_italica	76895	0	442665	519560
solanum_lycopersicum	878275	246939	1456133	2581347
solanum_tuberosum	387089	0	0	387089
sorghum_bicolor	42233	0	182396	224629
triticum_aestivum	4833453	4531	91030	4929014
triticum_urartu	31880	0	0	31880
vitis_vinifera	59915	0	81706	141621
zea_mays	4841229	2161246	402160	7404635
				52327590

## Sheet: Table S2
Supplementary Table 2: ChIP-seq experiments in Arabidopsis thaliana used in the analysis.
Protocol	Project	Pubmed/DOI	TF gene	TF name	TF family	Experiment name	NSC	RSC	QT	FRIP	SPOT	Peaks
ChIP-seq	﻿DRP003416	28100676	AT3G07610	IBM1	Jumonji	IBM1	1.01061	0.492095	-1	0.00705	0.0311	166
ChIP-seq	DRP004816		AT4G16310	LDL3	SWI/SNF-SWI3	LDL3_C14	1.03761	0.7582	0	0.16584	0.2837	1643
ChIP-seq	DRP006224	33649596	AT3G10390	FLD	SWI/SNF-SWI3	FLD_FLAG	1.14945	0.787017	0	0.31807	0.3198	7386
ChIP-seq	DRP006224	33649596	AT3G10390	FLD	SWI/SNF-SWI3	FLD_FLAG_fri	1.0931	0.582192	0	0.28966	0.3552	3299
ChIP-seq	DRP006224	33649596	AT3G10390	FLD	SWI/SNF-SWI3	FLD_FLAG_FRI	1.13275	0.66802	0	0.30512	0.3674	4586
ChIP-seq	ERP000559	21554688	AT1G24260	SEP3	MADS	inflo_less_material_SEP3	1.13345	0.345503	-1	0.16362	0.2396	1815
ChIP-seq	ERP000559	21554688	AT1G24260	SEP3	MADS	over_amplified_SEP3	1.06431	0.0769472	-2	0.19348	0.2877	716
ChIP-seq	ERP008446	28492275	AT5G18960	FRS12	FAR1	FRS12	1.26212	3.65034	2	0.45737	0.5466	9161
ChIP-seq	ERP008571	26232487	AT4G14720	PPD2	Tify	PPD2	1.12429	1.53387	2	0.32762	0.4563	1289
ChIP-seq	ERP009986	26721861	AT1G49950	TRB1	MYB-related	TRB1	1.05693	1.81701	2	0.098	0.1248	4191
ChIP-seq	ERP009986	26721861	AT1G49950	TRB1	MYB-related	TRB1_lhp1	1.09767	1.93615	2	0.15274	0.1823	6905
ChIP-seq	ERP011203	29121271	AT3G58190	LBD29	LBD	LBD29	1.1418	0.93848	0	0.33112	0.4228	2603
ChIP-seq	ERP021928	28804059	AT2G33860	ETT	ARF	ETT	1.02063	0.257044	-1	0.12404	0.1565	1541
ChIP-seq	ERP021928	28804059	AT2G33860	ETT	ARF	ETT_IAA	1.01441	0.288027	-1	0.17447	0.2048	2246
ChIP-seq	ERP104693	29763523	AT5G42520	BPC6	BBR-BPC	BPC6	1.63693	1.36759	1	0.41102	0.4457	6334
ChIP-seq	ERP106739	30770462	AT4G35900	FD	bZIP	FD_SAM	1.05823	0.42583	-1	0.05849	0.1199	1157
ChIP-seq	ERP106739	30770462	AT4G35900	FD	bZIP	FD_Col0	1.88472	1.38768	1	0.41897	0.4761	2687
ChIP-seq	ERP106739	30770462	AT4G35900	FD	bZIP	FD_ft10_tsf1	1.53687	1.31184	1	0.34097	0.4155	3204
ChIP-seq	ERP106905	29678859	AT4G14720	PPD2	Tify	PPD2_GSyellow	1.09782	0.691261	0	0.13272	0.3282	3365
ChIP-seq	ERP106905	29678859	AT4G14720	PPD2	Tify	PPD2_HBH	1.10767	1.01049	1	0.32809	0.4364	1220
ChIP-seq	ERP119493	32499315	AT1G67370	ASY1	SWI/SNF-SWI3	ASY1_flower_bud	1.1592	0.823683	0	0.10336	0.1569	1074
ChIP-seq	SRP000783	19385720	AT1G24260	SEP3	MADS	SEP3_WT	1.14644	0.565164	0	0.29496	0.3011	4569
ChIP-seq	SRP000783	19385720	AT1G24260	SEP3	MADS	SEP3_ag	1.11458	0.39062	-1	0.26307	0.3253	1398
ChIP-seq	SRP002174	20360106	AT1G69120	AP1	MADS	AP1_2h	1.09745	0.607944	0	0.20893	0.2406	1751
ChIP-seq	SRP002328	20675573	AT4G36920	AP2	AP2-EREBP	AP2	1.13018	0.319613	-1	0.13667	0.2013	1200
ChIP-seq	SRP002566	20144209	AT2G16910	AMS	bHLH	AMS	1.22977	1.8817	2	0.03743	0.1046	250
ChIP-seq	SRP003928	21515819	AT5G61850	LFY	LFY	LFY	1.67488	1.00103	1	0.4085	0.4763	4490
ChIP-seq	SRP005412	21464308	AT5G10140	FLC	MADS	FLC	1.06878	0.186394	-2	0.07049	0.1425	203
ChIP-seq	SRP006211	22578006	AT5G60690	REV	HB;HD-ZIP	REV	1.10165	0.748925	0	0.12297	0.1874	3510
ChIP-seq	SRP007485	21803941	AT3G22170	FHY3	FAR1	FHY3_dark	1.18565	0.256092	-1	0.17324	0.2342	1159
ChIP-seq	SRP007485	21803941	AT3G22170	FHY3	FAR1	FHY3_far_red	1.10713	0.157096	-2	0.14812	0.23	1014
ChIP-seq	SRP009053	23759218	AT2G22540	SVP	MADS	SVP_inflorescence	1.06599	0.129521	-2	0.0456	0.0966	131
ChIP-seq	SRP009053	23759218	AT2G22540	SVP	MADS	SVP_seedling	1.08218	0.239804	-2	0.13124	0.298	219
ChIP-seq	SRP010315	22820378	AT3G59060	PIF5	bHLH	PIF5ox	1.2237	0.910689	0	0.04872	0.1237	1083
ChIP-seq	SRP010570	22820378	AT2G43010	PIF4	bHLH	PIF4	1.63858	1.33787	1	0.27808	0.3539	2428
ChIP-seq	SRP010999	22403178	AT5G61380	TOC1	Pseudo ARR-B	TOC1	1.12059	0.358412	-1	0.06381	0.1628	218
ChIP-seq	SRP011389	23027938	AT5G24470	PRR5	Pseudo ARR-B	PRR5	1.88676	3.19525	2	0.4247	0.5151	7737
ChIP-seq	SRP013458	22847437	AT5G20240	PI	MADS	PI	1.06889	2.14293	2	0.17396	0.2424	1835
ChIP-seq	SRP013458	22847437	AT3G54340	AP3	MADS	AP3	1.07517	0.771933	0	0.11436	0.2098	1529
ChIP-seq	SRP014179	23382695	AT1G09530	PIF3	bHLH	PIF3	1.17657	0.932407	0	0.12715	0.173	1391
ChIP-seq	SRP014713	24453163	AT2G36010	E2FA	E2F-DP	E2Fa_TChAP	1.93087	1.49939	1	0.42673	0.5313	7818
ChIP-seq	SRP014713	24453163	AT2G36010	E2FA	E2F-DP	E2Fa_ChAP	1.23206	0.364718	-1	0.16746	0.3321	225
ChIP-seq	SRP014713	24453163	AT2G36010	E2FA	E2F-DP	E2Fa_ChIP	1.17418	0.606479	0	0.13626	0.2894	496
ChIP-seq	SRP017773	25122696	AT2G20180	PIF1	bHLH	PIF1	1.15941	0.599919	0	0.10351	0.1958	1459
ChIP-seq	SRP017774	25122696	AT2G43010	PIF4	bHLH	PIF4	1.11817	0.422826	-1	0.06914	0.151	553
ChIP-seq	SRP017793	23795294	AT3G20770	EIN3	EIL	EIN3_15min	1.10463	0.386434	-1	0.06866	0.2121	139
ChIP-seq	SRP017793	23795294	AT3G20770	EIN3	EIL	EIN3_30min	1.08268	0.282904	-1	0.09118	0.1909	854
ChIP-seq	SRP017793	23795294	AT3G20770	EIN3	EIL	EIN3_1hour	1.12332	0.504887	0	0.07886	0.2056	805
ChIP-seq	SRP017793	23795294	AT3G20770	EIN3	EIL	EIN3_4hour	1.10661	0.322358	-1	0.104	0.2053	1024
ChIP-seq	SRP017793	23795294	AT3G20770	EIN3	EIL	EIN3_12hour	1.13298	0.513483	0	0.08506	0.2051	471
ChIP-seq	SRP017793	23795294	AT3G20770	EIN3	EIL	EIN3_24hour	1.16735	0.610108	0	0.10775	0.2745	201
ChIP-seq	SRP017902	23795294	AT3G20770	EIN3	EIL	EIN3_4hour	1.09098	0.60047	0	0.04789	0.1299	962
ChIP-seq	SRP018094	23951554	AT1G01720	ATAF1	NAC	ATAF1	1.25024	0.14833	-2	0.2643	0.4648	2470
ChIP-seq	SRP020612	22791302	AT2G45660	SOC1	MADS	SOC1	1.31675	0.636463	0	0.29293	0.3537	831
ChIP-seq	SRP020911	23821642	AT4G18960	AG	MADS	AG	1.0572	0.417715	-1	0.10288	0.1577	1226
ChIP-seq	SRP022770	24581456	AT1G24260	SEP3	MADS	SEP3_day2	1.07265	0.38347	-1	0.11598	0.2269	1387
ChIP-seq	SRP022770	24581456	AT1G24260	SEP3	MADS	SEP3_day4	1.07741	1.1373	1	0.16591	0.2137	5022
ChIP-seq	SRP022770	24581456	AT1G24260	SEP3	MADS	SEP3_day8	1.05773	0.959594	0	0.13865	0.201	4901
ChIP-seq	SRP022770	24581456	AT1G69120	AP1	MADS	AP1_day2	1.0516	0.377855	-1	0.1778	0.3056	629
ChIP-seq	SRP022770	24581456	AT1G69120	AP1	MADS	AP1_day4	1.03443	0.361052	-1	0.12565	0.2044	898
ChIP-seq	SRP022770	24581456	AT1G69120	AP1	MADS	AP1_day8	1.03375	0.259031	-1	0.05739	0.0994	289
ChIP-seq	SRP026163	24067612	AT1G77080	FLM	MADS	FLM_beta	1.12164	0.429122	-1	0.0408	0.1368	192
ChIP-seq	SRP026163	24067612	AT1G77080	FLM	MADS	FLM	1.1313	0.329922	-1	0.12361	0.1969	657
ChIP-seq	SRP026164	24155946	AT5G16560	KAN1	G2-like	KANADI1	1.24162	1.02569	1	0.23062	0.2594	8013
ChIP-seq	SRP027018	24158907	AT5G07310	ERF115	AP2-EREBP	ERF115	1.10849	1.34889	1	0.2986	0.4351	1070
ChIP-seq	SRP027413	24001316	AT3G20740	FIE	FIE	FIE	1.14068	0.380972	-1	0.24469	0.3932	264
ChIP-seq	SRP028272	23808423	AT5G02810	PRR7	Pseudo ARR-B	PRR7	1.17038	0.48495	-1	0.0657	0.1671	1103
ChIP-seq	SRP028272	23808423	AT5G02810	PRR7	Pseudo ARR-B	PRR7_prr7_3	1.09509	0.252855	-1	0.0275	0.0883	275
ChIP-seq	SRP030400	24505057	AT4G30410	IBL1	bHLH	IBL1	1.17158	0.78468	0	0.13	0.2686	66
ChIP-seq	SRP032273	24867218	AT1G30330	ARF6	ARF	ARF6	1.24604	0.628131	0	0.16459	0.2694	1090
ChIP-seq	SRP032781	30191576	AT1G01060	LHY	MYB-related	LHY	1.06943	0.821933	0	0.30071	0.3103	6040
ChIP-seq	SRP033014	25564655	AT5G17430	BBM	AP2-EREBP	BBM_embryo	1.01828	0	NA	0.18065	0.1838	6760
ChIP-seq	SRP033014	25564655	AT5G17430	BBM	AP2-EREBP	BBM_seedlings	1.03258	0	NA	0.32868	0.3155	13545
ChIP-seq	SRP035355	24958886	AT5G49450	bZIP1	bZIP	bZIP1	1.12934	1.0778	1	0.1199	0.1564	669
ChIP-seq	SRP037581	25853185	AT2G22540	SVP	MADS	SVP	1.03442	0.453217	-1	0.0589	0.1136	614
ChIP-seq	SRP037581	25853185	AT2G22540	SVP	MADS	SVP_flc	1.02887	0.256355	-1	0.03374	0.0744	410
ChIP-seq	SRP037581	25853185	AT5G10140	FLC	MADS	FLC	1.04665	0.160939	-2	0.03347	0.0642	106
ChIP-seq	SRP037581	25853185	AT5G10140	FLC	MADS	FLC_svp	1.00859	0.0356208	-2	0.04162	0.0859	228
ChIP-seq	SRP041827	25190717	AT5G53210	SPCH	bHLH	SPCH	1.07828	2.57766	2	0.25742	0.2482	16132
ChIP-seq	SRP043541	25684209	AT5G59800	MBD7	MBD	MBD7	1.2948	3.60951	2	0.14224	0.2744	3094
ChIP-seq	SRP044142	26134422	AT2G01570	RGA	GRAS	RGA	1.08755	0.373342	-1	0.04731	0.0913	950
ChIP-seq	SRP045178	26494755	AT1G14580	BLJ	C2H2	BLJ	1.28662	1.61335	2	0.25197	0.3347	8656
ChIP-seq	SRP045178	26494755	AT5G03150	JKD	C2H2	JKD	1.2385	2.58963	2	0.18211	0.2618	2196
ChIP-seq	SRP045252	26617990	AT3G10480	NAC050	NAC	NAC050	1.28069	3.2163	2	0.10672	0.2373	479
ChIP-seq	SRP045252	26617990	AT3G10490	NAC052	NAC	NAC052	1.24987	1.84403	2	0.09594	0.2163	306
ChIP-seq	SRP045252	26617990	AT4G20400	JMJ14	Jumonji	JMJ14_HA	1.54989	3.3319	2	0.12017	0.2913	934
ChIP-seq	SRP045252	26617990	AT4G20400	JMJ14	Jumonji	JMJ14_HA_jmj14	1.4204	1.78988	2	0.04619	0.1759	52
ChIP-seq	SRP045252	26617990	AT4G20400	JMJ14	Jumonji	JMJ14_FYR_HA	1.54407	3.20826	2	0.08336	0.231	706
ChIP-seq	SRP045297	27203113	AT2G36270	ABI5	bZIP	ABI5_antibody	1.01958	0.994858	0	0.02355	0.0512	859
ChIP-seq	SRP045297	27203113	AT2G36270	ABI5	bZIP	ABI5_Ypet	1.07321	1.18156	1	0.07324	0.0991	4326
ChIP-seq	SRP045633	26069325	AT3G09370	MYB3R3	MYB	MYB3R3	1.34373	1.25208	1	0.28587	0.3618	993
ChIP-seq	SRP048725	25534860	AT5G11260	HY5	bZIP	HY5_gDBseq	2.00449	2.50413	2	0.41788	0.2599	1570
ChIP-seq	SRP048935	28673986	AT4G31920	ARR10	ARR-B	ARR10	1.06056	0	NA	0.27695	0.2802	7631
ChIP-seq	SRP048935	28673986	AT4G31920	ARR10	ARR-B	ARR10_BA	1.04725	17.3509	2	0.17184	0.2421	3158
ChIP-seq	SRP048935	28673986	AT4G31920	ARR10	ARR-B	ARR10_Mock	1.06956	2.70656	2	0.19151	0.3045	1149
ChIP-seq	SRP049385	25928034	AT1G77300	SDG8	SET	SDG8_HA	1.12345	0.966068	0	0.04335	0.1028	247
ChIP-seq	SRP049385	25928034	AT1G77300	SDG8	SET	SDG8_H3K36	1.15272	1.1826	1	0.58809	0.5793	11940
ChIP-seq	SRP051214	27097556	AT5G61850	LFY	LFY	LFY	2.08876	1.63921	2	0.44274	0.4933	9079
ChIP-seq	SRP051214	27097556	AT5G61850	LFY	LFY	LFY_TERE	1.49411	1.09184	1	0.28555	0.4306	2922
ChIP-seq	SRP052855	27111035	AT3G48430	REF6	C2H2	REF6_HA	1.23815	1.50051	2	0.14212	0.2054	1838
ChIP-seq	SRP054900	27698117	AT3G60390	HAT3	HB;HD-ZIP	HAT3_1	1.19874	1.06834	1	0.03625	0.0902	694
ChIP-seq	SRP055505	26076231	AT2G38470	WRKY33	WRKY	WRKY33_mock	1.16923	1.3876	1	0.11123	0.2465	203
ChIP-seq	SRP055505	26076231	AT2G38470	WRKY33	WRKY	WRKY33_Bc	1.3075	2.03044	2	0.45088	0.4756	8491
ChIP-seq	SRP055505	26076231	AT2G38470	WRKY33	WRKY	WRKY33_WT	1.24482	2.00253	2	0.06278	0.2404	707
ChIP-seq	SRP057254	26941090	AT2G46830	CCA1	MYB-related	CCA1_IonPGM	1.43997	1.0441	1	0.3426	0.4302	2000
ChIP-seq	SRP057254	26941090	AT2G46830	CCA1	MYB-related	CCA1_Illumina	1.6915	0.915645	0	0.32378	0.3615	780
ChIP-seq	SRP057594	26724867	AT2G43010	PIF4	bHLH	PIF4	1.05208	3.13093	2	0.24807	0.2457	9291
ChIP-seq	SRP057594	26724867	AT3G59060	PIF5	bHLH	PIF5	1.02723	0.934787	0	0.08252	0.1238	2535
ChIP-seq	SRP058919	27469166	AT3G22170	FHY3	FAR1	FHY3	1.02885	0.128817	-2	0.14321	0.113	711
ChIP-seq	SRP058939	26597966	AT1G49950	TRB1	MYB-related	TRB1_GFP	1.27426	0	NA	0.36988	0.3905	10265
ChIP-seq	SRP058939	26597966	AT1G49950	TRB1	MYB-related	TRB1	1.23823	0	NA	0.3299	0.3543	6762
ChIP-seq	SRP060240	28115468	AT5G59380	MBD6	MBD	MBD6	1.02981	0.593589	0	0.02836	0.0558	966
ChIP-seq	SRP060240	28115468	AT4G13460	SUVH9	SET	SUVH9	1.03543	0.197188	-2	0.03907	0.1035	1596
ChIP-seq	SRP060240	28115468	AT4G13460	SUVH9	SET	SUVH9_cmt2	1.03823	0.335614	-1	0.02222	0.0689	112
ChIP-seq	SRP060360	26261339	AT2G46830	CCA1	MYB-related	CCA1_LL	1.08552	0.164753	-2	0.15232	0.2221	1794
ChIP-seq	SRP060360	26261339	AT2G46830	CCA1	MYB-related	CCA1_LD	1.00567	0.0119828	-2	0.16737	0.2492	1477
ChIP-seq	SRP060360	26261339	AT2G46830	CCA1	MYB-related	CCA1_ZT	1.08543	0.136976	-2	0.13184	0.3288	171
ChIP-seq	SRP061647	26586835	AT2G46790	PRR9	Orphans;Pseudo ARR-B	PRR9	1.05057	0.111903	-2	0.0536	0.1028	535
ChIP-seq	SRP063352	27111034	AT2G46020	BRM	SNF2	BRM	1.08677	1.29853	1	0.28034	0.3607	6496
ChIP-seq	SRP063352	27111034	AT2G46020	BRM	SNF2	BRM_ref6	1.0427	0.637401	0	0.1852	0.2692	1740
ChIP-seq	SRP063352	27111034	AT3G48430	REF6	C2H2	REF6	1.13179	0	NA	0.26835	0.2948	3726
ChIP-seq	SRP063352	27111034	AT3G48430	REF6	C2H2	REF6_brm	1.07414	0	NA	0.22298	0.2349	2052
ChIP-seq	SRP070904	27666746	AT5G02030	BLR	HB;TALE	BLR	1.17833	1.48194	1	0.2383	0.263	7634
ChIP-seq	SRP071948	28893714	AT4G17750	HSFA1A	HSF	HSFA1A_17c_15min	1.04745	0.481791	-1	0.11016	0.1755	870
ChIP-seq	SRP071948	28893714	AT4G17750	HSFA1A	HSF	HSFA1A_27c_15min	1.06745	0.399136	-1	0.08716	0.1384	427
ChIP-seq	SRP071948	28893714	AT4G17750	HSFA1A	HSF	HSFA1A_37c_15min	1.06363	0.357967	-1	0.09311	0.1572	377
ChIP-seq	SRP072125	27680998	AT3G20010	FRG1	SNF2	FRG1_ACC	1.10547	0.399708	-1	0.0735	0.0878	1098
ChIP-seq	SRP072125	27680998	AT3G20010	FRG1	SNF2	FRG1_NHS	1.08692	0.370989	-1	0.04415	0.0559	1201
ChIP-seq	SRP072249	28586421	AT5G60910	FUL	MADS	FUL_GFP	1.05621	0.175946	-2	0.10521	0.1995	770
ChIP-seq	SRP072664	27920338	AT1G51190	PLT2	AP2-EREBP	PLT2	1.07241	0.221206	-2	0.10225	0.217	729
ChIP-seq	SRP073709	27811239	AT1G49720	ABF1	bZIP	ABF1_ABA	1.07487	1.54568	2	0.22767	0.236	10087
ChIP-seq	SRP073709	27811239	AT1G49720	ABF1	bZIP	ABF1_EtOH	1.0472	1.12537	1	0.0729	0.1057	3328
ChIP-seq	SRP073709	27811239	AT4G34000	ABF3	bZIP	ABF3_ABA	1.05872	1.45702	1	0.34942	0.3254	14741
ChIP-seq	SRP073709	27811239	AT4G34000	ABF3	bZIP	ABF3_EtOH	1.06253	1.43162	1	0.28921	0.272	13260
ChIP-seq	SRP073709	27811239	AT3G19290	ABF4	bZIP	ABF4_ABA	1.05598	1.42433	1	0.26066	0.2441	12122
ChIP-seq	SRP073709	27811239	AT3G19290	ABF4	bZIP	ABF4_EtOH	1.05525	1.2593	1	0.18841	0.1796	8560
ChIP-seq	SRP073709	27811239	AT1G77450	ANAC032	NAC	ANAC032_ABA	1.03884	1.41195	1	0.22231	0.2282	9905
ChIP-seq	SRP073709	27811239	AT1G77450	ANAC032	NAC	ANAC032_EtOH	1.02708	1.18026	1	0.03793	0.0764	1166
ChIP-seq	SRP073709	27811239	AT5G63790	ANAC102	NAC	ANAC102_ABA	1.04234	1.19475	1	0.14011	0.1606	6082
ChIP-seq	SRP073709	27811239	AT5G63790	ANAC102	NAC	ANAC102_EtOH	1.03968	1.23657	1	0.0963	0.1302	3461
ChIP-seq	SRP073709	27811239	AT5G04760	AT5G04760	MYB	AT5G04760_ABA	1.05589	1.50256	2	0.31931	0.3142	16126
ChIP-seq	SRP073709	27811239	AT5G04760	AT5G04760	MYB	AT5G04760_EtOH	1.06032	1.47172	1	0.2777	0.2791	13126
ChIP-seq	SRP073709	27811239	AT5G05410	DREB2A	AP2-EREBP	DREB2A_ABA	1.05238	0.981412	0	0.18573	0.2215	2868
ChIP-seq	SRP073709	27811239	AT5G05410	DREB2A	AP2-EREBP	DREB2A_EtOH	1.05157	1.00379	1	0.02524	0.0729	1183
ChIP-seq	SRP073709	27811239	AT1G51140	FBH3	bHLH	FBH3_ABA	1.02574	1.18864	1	0.068	0.1003	1641
ChIP-seq	SRP073709	27811239	AT1G51140	FBH3	bHLH	FBH3_EtOH	1.02187	1.29039	1	0.14864	0.1862	4520
ChIP-seq	SRP073709	27811239	AT4G01120	GBF2	bZIP	GBF2_ABA	1.09738	1.93413	2	0.2746	0.2671	13929
ChIP-seq	SRP073709	27811239	AT4G01120	GBF2	bZIP	GBF2_EtOH	1.09538	1.90892	2	0.27086	0.2613	13126
ChIP-seq	SRP073709	27811239	AT2G46270	GBF3	bZIP	GBF3_ABA	1.15392	3.63443	2	0.35141	0.3289	17190
ChIP-seq	SRP073709	27811239	AT2G46270	GBF3	bZIP	GBF3_EtOH	1.10877	10.5475	2	0.3346	0.3178	15233
ChIP-seq	SRP073709	27811239	AT4G37790	HAT22	HB;HD-ZIP	HAT22_ABA	1.07599	1.95057	2	0.25908	0.2567	12508
ChIP-seq	SRP073709	27811239	AT4G37790	HAT22	HB;HD-ZIP	HAT22_EtOH	1.07465	1.64867	2	0.20765	0.2114	10893
ChIP-seq	SRP073709	27811239	AT5G65310	HB5	HB;HD-ZIP	HB5_ABA	1.07471	1.59909	2	0.27472	0.2739	13266
ChIP-seq	SRP073709	27811239	AT5G65310	HB5	HB;HD-ZIP	HB5_EtOH	1.08613	1.50938	2	0.28425	0.2844	13473
ChIP-seq	SRP073709	27811239	AT2G22430	HB6	HB;HD-ZIP	HB6_ABA	1.08709	1.52402	2	0.33084	0.327	14959
ChIP-seq	SRP073709	27811239	AT2G22430	HB6	HB;HD-ZIP	HB6_EtOH	1.05242	1.27267	1	0.16043	0.1822	9176
ChIP-seq	SRP073709	27811239	AT2G46680	HB7	HB;HD-ZIP	HB7_ABA	1.08901	1.57195	2	0.36617	0.3557	16621
ChIP-seq	SRP073709	27811239	AT2G46680	HB7	HB;HD-ZIP	HB7_EtOH	1.04428	1.32362	1	0.14586	0.1775	6437
ChIP-seq	SRP073709	27811239	AT5G43840	HSFA6A	HSF	HSFA6A_ABA	1.03525	1.21615	1	0.07976	0.1106	3391
ChIP-seq	SRP073709	27811239	AT5G43840	HSFA6A	HSF	HSFA6A_EtOH	1.03537	1.16522	1	0.014	0.0484	190
ChIP-seq	SRP073709	27811239	AT1G22640	MYB3	MYB	MYB3_ABA	1.04249	1.38214	1	0.22223	0.2374	10886
ChIP-seq	SRP073709	27811239	AT1G22640	MYB3	MYB	MYB3_EtOH	1.03135	1.28088	1	0.14644	0.1719	6991
ChIP-seq	SRP073709	27811239	AT5G67300	MYB44	MYB	MYB44_ABA	1.08396	1.58178	2	0.31697	0.3122	15283
ChIP-seq	SRP073709	27811239	AT5G67300	MYB44	MYB	MYB44_EtOH	1.06098	1.44479	1	0.21834	0.2329	10377
ChIP-seq	SRP073709	27811239	AT5G47640	NFYB2	CCAAT;NF-YB	NFYB2_ABA	1.32066	1.58059	2	0.46882	0.4504	22751
ChIP-seq	SRP073709	27811239	AT5G47640	NFYB2	CCAAT;NF-YB	NFYB2_EtOH	1.22679	1.68064	2	0.35509	0.3429	16362
ChIP-seq	SRP073709	27811239	AT1G56170	NFYC2	CCAAT;NF-YC	NFYC2_ABA	1.09376	1.54763	2	0.20042	0.2208	8489
ChIP-seq	SRP073709	27811239	AT1G56170	NFYC2	CCAAT;NF-YC	NFYC2_EtOH	1.0724	1.38464	1	0.14003	0.1681	6400
ChIP-seq	SRP073709	27811239	AT4G27410	RD26	NAC	RD26_ABA	1.05789	1.46822	1	0.32767	0.3136	16194
ChIP-seq	SRP073709	27811239	AT4G27410	RD26	NAC	RD26_EtOH	1.0594	1.36696	1	0.24622	0.2531	11295
ChIP-seq	SRP073709	27811239	AT5G04340	ZAT6	C2H2	ZAT6_ABA	1.07239	1.71596	2	0.28717	0.2929	14620
ChIP-seq	SRP073709	27811239	AT5G04340	ZAT6	C2H2	ZAT6_EtOH	1.07576	1.49646	1	0.24543	0.2545	11565
ChIP-seq	SRP074584	28874528	AT3G11100	ENAP1	Trihelix	COL_ENAP1_air	1.5833	1.34991	1	0.34728	0.3732	7779
ChIP-seq	SRP074584	28874528	AT3G11100	ENAP1	Trihelix	COL_ENAP1_C2H4	1.21017	1.07274	1	0.25737	0.3039	4867
ChIP-seq	SRP074584	28874528	AT3G11100	ENAP1	Trihelix	ein2_ENAP1_air	1.23407	0.990233	0	0.18427	0.2045	4059
ChIP-seq	SRP074584	28874528	AT3G11100	ENAP1	Trihelix	ein2_ENAP1_C2H4	1.17997	1.33096	1	0.23484	0.2394	6162
ChIP-seq	SRP078751	28825728	AT3G20740	FIE	FIE	FIE	1.9633	1.04424	1	0.29686	0.4195	2600
ChIP-seq	SRP078751	28825728	AT5G67450	AZF1	C2H2	AZF1	2.10504	1.37978	1	0.33303	0.4346	5032
ChIP-seq	SRP078751	28825728	AT2G01930	BPC1	BBR-BPC	BPC1	1.7733	1.3769	1	0.26978	0.3966	3403
ChIP-seq	SRP079863	27500884	AT3G54610	GCN5	GNAT	GCN5	1.26449	0.806932	0	0.08425	0.1814	227
ChIP-seq	SRP082176	29697803	AT5G16820	HSFA1B	HSF	NP_HSFA1b_NS	1.20056	1.31591	1	0.07462	0.1127	295
ChIP-seq	SRP082176	29697803	AT5G16820	HSFA1B	HSF	NP_HSFA1b_HS	1.24935	1.371	1	0.09934	0.1214	285
ChIP-seq	SRP082176	29697803	AT5G16820	HSFA1B	HSF	35S_HSFA1b_NS	1.12912	1.40282	1	0.31295	0.3287	7912
ChIP-seq	SRP082176	29697803	AT5G16820	HSFA1B	HSF	35S_HSFA1b_HS	1.12281	1.97309	2	0.1193	0.1921	445
ChIP-seq	SRP082531	28011690	AT4G31800	WRKY18	WRKY	WRKY18_0h	1.27708	1.77066	2	0.32959	0.3702	7407
ChIP-seq	SRP082531	28011690	AT4G31800	WRKY18	WRKY	WRKY18_2h	1.22401	1.61894	2	0.42271	0.4319	9653
ChIP-seq	SRP082531	28011690	AT2G38470	WRKY33	WRKY	WRKY33_0h	1.27554	2.77922	2	0.08828	0.1998	1544
ChIP-seq	SRP082531	28011690	AT2G38470	WRKY33	WRKY	WRKY33_2h	1.38267	1.55065	2	0.43497	0.4596	10325
ChIP-seq	SRP082531	28011690	AT1G80840	WRKY40	WRKY	WRKY40_0h	1.23886	2.71269	2	0.06882	0.1758	1059
ChIP-seq	SRP082531	28011690	AT1G80840	WRKY40	WRKY	WRKY40_2h	1.29047	1.46982	1	0.41657	0.4312	9388
ChIP-seq	SRP092318	27934869	AT4G31270	HDP2	Trihelix	HDP2	1.11442	0.580089	0	0.12102	0.1352	2414
ChIP-seq	SRP092341	28619072	AT5G14170	BAF60	SWI/SNF-BAF60b	BAF60	1.14692	0.45156	-1	0.12065	0.1957	1550
ChIP-seq	SRP093390	29203652	AT5G10140	FLC	MADS	FLC_WT	1.03167	0.175608	-2	0.0556	0.0804	495
ChIP-seq	SRP095372		AT4G28610	PHR1	G2-like	Col_Pminus	1.05589	0.0783093	-2	0.11329	0.1723	1020
ChIP-seq	SRP095372		AT4G28610	PHR1	G2-like	Col_Pplus	1.04705	0.053004	-2	0.14411	0.2342	914
ChIP-seq	SRP095372		AT4G28610	PHR1	G2-like	PHR1_Pminus	1.12786	0.400053	-1	0.11415	0.18	2446
ChIP-seq	SRP095372		AT4G28610	PHR1	G2-like	PHR1_Pplus	1.06053	0.0940414	-2	0.11532	0.1545	891
ChIP-seq	SRP098090	28442596	AT3G10800	bZIP28	bZIP	bZIP28	1.18053	0.926312	0	0.05235	0.0596	320
ChIP-seq	SRP098090	28442596	AT3G10800	bZIP28	bZIP	bZIP28_v2	1.17879	0.934016	0	0.05235	0.0588	185
ChIP-seq	SRP098621	29058667	AT5G67060	HEC1	bHLH	WT	1.09516	0.219955	-2	0.08508	0.158	855
ChIP-seq	SRP098621	29058667	AT5G67060	HEC1	bHLH	35S_HEC1	1.28134	0.861185	0	0.23325	0.2776	6182
ChIP-seq	SRP098817	29686312	AT3G16857	ARR1	ARR-B	ARR1.2_etiolated_mock	1.06865	1.22014	1	0.07965	0.1225	2559
ChIP-seq	SRP098817	29686312	AT3G16857	ARR1	ARR-B	ARR1.2_LD_mock	1.10051	0.819212	0	0.13418	0.1754	3489
ChIP-seq	SRP098817	29686312	AT3G16857	ARR1	ARR-B	ARR1.2_LD_6BA	1.03501	0.992097	0	0.16741	0.1849	6157
ChIP-seq	SRP098817	29686312	AT3G16857	ARR1	ARR-B	ARR1.2_S89S99_LD_p6BA_3D	1.08379	1.18297	1	0.47424	0.4971	17781
ChIP-seq	SRP098817	29686312	AT3G16857	ARR1	ARR-B	DDK_e	1.09058	2.28998	2	0.20744	0.2683	4798
ChIP-seq	SRP098817	29686312	AT4G31920	ARR10	ARR-B	ARR10_16_1_mock	1.0973	0.91282	0	0.2394	0.2787	6559
ChIP-seq	SRP098817	29686312	AT4G31920	ARR10	ARR-B	ARR10_16_1_6BA	1.096	0.961062	0	0.23142	0.252	8305
ChIP-seq	SRP098817	29686312	AT2G25180	ARR12	ARR-B	ARR12_mock	1.17025	0.947496	0	0.22653	0.3176	2169
ChIP-seq	SRP098817	29686312	AT2G25180	ARR12	ARR-B	ARR12_6BA	1.12496	1.00546	1	0.10238	0.1717	1977
ChIP-seq	SRP098817	29686312	AT2G01760	ARR14	ARR-B	ARR14_p6BA	1.12435	0	NA	0.47339	0.4864	14434
ChIP-seq	SRP099840	28827519	AT2G01570	RGA	GRAS	RGA_GFP	1.10938	1.25665	1	0.26669	0.3027	9375
ChIP-seq	SRP100927	28825728	AT3G20740	FIE	FIE	FIE_WT	1.05452	0.21743	-2	0.0903	0.1386	1458
ChIP-seq	SRP100927	28825728	AT3G20740	FIE	FIE	FIE_BPC_ZnF	1.06325	0.203607	-2	0.07756	0.1227	1070
ChIP-seq	SRP102171	28385730	AT5G61850	LFY	LFY	LFYGR	1.04936	0.343748	-1	0.04614	0.1109	588
ChIP-seq	SRP102817	28874528	AT3G11100	ENAP1	Trihelix	ENAP1_air	1.29335	1.34303	1	0.19598	0.2271	3043
ChIP-seq	SRP102817	28874528	AT3G11100	ENAP1	Trihelix	EIN2reChIP_air	1.05163	0.146483	-2	0.09212	0.1876	126
ChIP-seq	SRP102817	28874528	AT3G11100	ENAP1	Trihelix	ENAP1_C2H4	1.31985	1.28483	1	0.2247	0.2582	3594
ChIP-seq	SRP102817	28874528	AT3G11100	ENAP1	Trihelix	EIN2reChIP_C2H4	1.23269	0.568739	0	0.16763	0.2552	342
ChIP-seq	SRP103734	31245665	AT5G56860	GNC	C2C2-GATA	AtGNC	1.05379	0.14231	-2	0.28091	0.448	3692
ChIP-seq	SRP103734	31245665	AT4G26150	CGA1	C2C2-GATA	AtCGA1	1.078	0.152485	-2	0.10486	0.183	200
ChIP-seq	SRP105160	28864470;28650433	AT3G46640	LUX	G2-like	LUX_ZT10_17C	1.06635	0.440303	-1	0.0487	0.1057	795
ChIP-seq	SRP105160	28864470;28650433	AT3G46640	LUX	G2-like	LUX_ZT8_17C	1.06843	0.373916	-1	0.02176	0.0786	558
ChIP-seq	SRP105160	28864470;28650433	AT3G46640	LUX	G2-like	LUX_ZT9_17C	1.06876	0.375293	-1	0.05391	0.1161	642
ChIP-seq	SRP105160	28864470;28650433	AT3G46640	LUX	G2-like	LUX_ZT10_22C	1.05106	0.337429	-1	0.02305	0.0681	378
ChIP-seq	SRP105160	28864470;28650433	AT3G46640	LUX	G2-like	LUX_ZT12_22C	1.0643	0.81277	0	0.01644	0.048	673
ChIP-seq	SRP105160	28864470;28650433	AT3G46640	LUX	G2-like	LUX_ZT10_17C_to_27C	1.05458	0.300507	-1	0.02394	0.0659	451
ChIP-seq	SRP105160	28864470;28650433	AT3G46640	LUX	G2-like	LUX_ZT9_17C_to_27C	1.05849	0.334309	-1	0.0284	0.0724	508
ChIP-seq	SRP108548	28739919	AT1G21970	LEC1	CCAAT;NF-YB	LEC1	1.17323	1.76611	2	0.35178	0.3803	10446
ChIP-seq	SRP111909	30082787	AT2G23380	CLF	CLF	CLF_FLAG	1.07033	0.381468	-1	0.01711	0.0727	422
ChIP-seq	SRP111909	30082787	AT4G22140	EBS	PHD	EBS_FLAG	1.04153	0.574426	0	0.0824	0.1881	779
ChIP-seq	SRP111909	30082787	AT4G22140	EBS	PHD	EBS_dC_FLAG	1.07648	0.886786	0	0.10666	0.198	1835
ChIP-seq	SRP116014		AT3G11100	ENAP1	Trihelix	ENAP1_air	1.39276	0.886724	0	0.20247	0.262	3158
ChIP-seq	SRP116014		AT3G11100	ENAP1	Trihelix	ENAP1_C2H4	1.24679	1.52	2	0.18516	0.2202	3895
ChIP-seq	SRP117277	28864470	AT2G43010	PIF4	bHLH	PIF4	1.04434	0.814005	0	0.10146	0.1473	1779
ChIP-seq	SRP119038	30082786	AT4G22140	EBS	PHD	EBS	1.61963	3.33952	2	0.28651	0.3285	2572
ChIP-seq	SRP119039	30082786	AT1G62360	SHL	HB;TALE	SHL	1.12191	0	NA	0.33404	0.3918	1605
ChIP-seq	SRP119484		AT2G28290	SYD	SNF2	Col_flower_SYD	1.0232	0	NA	0.41534	0.4195	14572
ChIP-seq	SRP119484		AT2G28290	SYD	SNF2	clf_flower_SYD	1.03198	0	NA	0.51653	0.5194	19193
ChIP-seq	SRP119484		AT2G28290	SYD	SNF2	syd_flower_SYD	1.04164	4.43354	2	0.18268	0.2648	1307
ChIP-seq	SRP123349	29430765	AT1G25580	SOG1	NAC	SOG1_myc	1.09709	0.379418	-1	0.08129	0.1896	262
ChIP-seq	SRP125149	30104650	AT3G48430	REF6	C2H2	REF6_noDSG	1.26372	0.969118	0	0.19011	0.2095	4744
ChIP-seq	SRP125149	30104650	AT3G48430	REF6	C2H2	REF6_DSG	1.22646	0.99245	0	0.22663	0.2311	5900
ChIP-seq	SRP125149	30104650	AT3G48430	REF6	C2H2	REF6_ZnF_DSG_ref6	1.03601	0.252243	-1	0.02575	0.0788	168
ChIP-seq	SRP125149	30104650	AT3G48430	REF6	C2H2	REF6_ZnF_DSG_triple	1.10737	0.742156	0	0.19291	0.2388	4790
ChIP-seq	SRP126460	29343504	AT5G03740	HD2C	C2H2	HD2C	1.08398	0.442537	-1	0.08509	0.1856	448
ChIP-seq	SRP127365	30523112	AT5G04940	SUVH1	SET	SUVH1	1.01797	0	NA	0.22699	0.2168	7074
ChIP-seq	SRP127365	30523112	AT1G73100	SUVH3	SET	SUVH3	1.04591	0.324096	-1	0.1191	0.1511	1587
ChIP-seq	SRP127365	30523112	AT5G04940	SUVH1	SET	SUVH1_drm1_2	1.01905	0.406911	-1	0.01742	0.0373	245
ChIP-seq	SRP127365	30523112	AT5G04940	SUVH1	SET	SUVH1_nrpd1	1.01052	0.163341	-2	0.02421	0.0422	286
ChIP-seq	SRP127365	30523112	AT5G04940	SUVH1	SET	SUVH1_suvh1	1.01202	1.53596	2	0.11556	0.1095	3041
ChIP-seq	SRP127365	30523112	AT5G04940	SUVH1	SET	SUVH1_full_suvh1	1.13587	7.14304	2	0.41606	0.4021	5396
ChIP-seq	SRP127365	30523112	AT5G04940	SUVH1	SET	SUVH1_Y277A_suvh1	1.07747	0.358121	-1	0.16704	0.1829	2039
ChIP-seq	SRP127403	29422669	AT5G60910	FUL	MADS	FUL_IM	1.037	0	NA	0.32087	0.3126	10413
ChIP-seq	SRP127403	29422669	AT5G60910	FUL	MADS	FUL_pistil	1.04859	0.714303	0	0.18693	0.2274	3993
ChIP-seq	SRP128032	30500810	AT3G12280	RBR1	RB	RBR1	1.05028	0.341743	-1	0.07911	0.2098	3200
ChIP-seq	SRP128550	31245749	AT2G23380	CLF	CLF	CLF	1.02649	0.413453	-1	0.11301	0.1395	1326
ChIP-seq	SRP128550	31245749	AT4G02020	SWN	SWN	SWN	1.03232	0.289077	-1	0.13137	0.1571	1694
ChIP-seq	SRP129015	30044528	AT4G31800	WRKY18	WRKY	WRKY_WT_0h	1.18828	1.13271	1	0.36899	0.3824	9677
ChIP-seq	SRP129015	30044528	AT4G31800	WRKY18	WRKY	WRKY_WT_2h	1.20408	1.1695	1	0.44083	0.4541	11579
ChIP-seq	SRP129015	30044528	AT4G31800	WRKY18	WRKY	WRKY_tri_0h	1.3149	1.12731	1	0.3811	0.3921	10150
ChIP-seq	SRP129015	30044528	AT4G31800	WRKY18	WRKY	WRKY_tri_2h	1.20844	1.16179	1	0.42448	0.4368	11940
ChIP-seq	SRP131954	29725104	AT1G21970	LEC1	CCAAT;NF-YB	LEC1	1.14268	0.836496	0	0.17158	0.2069	4441
ChIP-seq	SRP133402	30002259	AT5G56860	GNC	C2C2-GATA	35S_GNC	1.04112	0	NA	0.4221	0.4306	11083
ChIP-seq	SRP135285	29930355	AT1G62360	SHL	HB;TALE	SHL	1.06073	0.384833	-1	0.02928	0.1132	75
ChIP-seq	SRP135688	31048693	AT3G48430	REF6	C2H2	REF6_Col0	1.13542	1.14641	1	0.18099	0.2046	1532
ChIP-seq	SRP135688	31048693	AT3G48430	REF6	C2H2	REF6_ddcc	1.1101	1.33482	1	0.21764	0.2605	1995
ChIP-seq	SRP135688	31048693	AT3G48430	REF6	C2H2	REF6_met1	1.12533	0.987032	0	0.1229	0.1182	794
ChIP-seq	SRP136806	30541889	AT1G25580	SOG1	NAC	SOG1_20min	1.03993	0.393996	-1	0.01795	0.0508	85
ChIP-seq	SRP136806	30541889	AT1G25580	SOG1	NAC	SOG1_1h	1.03399	0.391866	-1	0.01734	0.0529	121
ChIP-seq	SRP136806	30541889	AT1G25580	SOG1	NAC	SOG1_20min_2	1.03993	0.393996	-1	0.01795	0.0508	124
ChIP-seq	SRP136806	30541889	AT1G25580	SOG1	NAC	SOG1_1h_2	1.0326	0.380286	-1	0.01734	0.0493	164
ChIP-seq	SRP139567	29686058	AT5G39760	ZFHD10	zf-HD	OX_ZFHD10	1.09235	0.902567	0	0.22555	0.2557	4521
ChIP-seq	SRP145638	31755159	AT1G32640	MYC2	bHLH	MYC2	1.15322	0.799896	0	0.15125	0.1533	2735
ChIP-seq	SRP145638	31755159	AT5G46760	MYC3	bHLH	MYC3	1.25935	0.887725	0	0.17491	0.1808	4297
ChIP-seq	SRP149806	30914467	AT3G15030	TCP4	TCP	TCP4	1.43509	2.07844	2	0.27246	0.3218	6498
ChIP-seq	SRP155528	30256479	AT5G11260	HY5	bZIP	HY5_BL	1.21846	0	NA	0.51602	0.5171	14550
ChIP-seq	SRP155528	30256479	AT5G11260	HY5	bZIP	HY5_RL	1.17667	0	NA	0.36933	0.3873	9364
ChIP-seq	SRP156129	30124938	AT1G62830	LDL1	SWI/SNF-SWI3	LDL1	1.08818	0.495419	-1	0.03806	0.165	567
ChIP-seq	SRP157987	31128276	AT4G14605	MTERF5	mTERF	MTERF5_HA	1.63486	0.217956	-2	0.52858	0.5633	139
ChIP-seq	SRP161929	30677094	AT2G02080	IDD4	C2H2	IDD4	1.28583	0.975526	0	0.05893	0.0704	1108
ChIP-seq	SRP167275	33139535	AT4G35610	TREE1	C2H2	TREE1_air	1.13987	1.37556	1	0.28698	0.3806	1132
ChIP-seq	SRP167275	33139535	AT4G35610	TREE1	C2H2	TREE1_C2H4	1.11636	1.04613	1	0.28818	0.3446	2833
ChIP-seq	SRP168223	31418686	AT3G48430	EIN6	C2H2	EIN6_ZNF_DAPseq	1.03425	0.235505	-2	0.03795	0.1526	406
ChIP-seq	SRP168223	31418686	AT3G48430	EIN6	C2H2	Ler_35S_EIN6FLAG_3d_air_rep1	1.1264	0.885704	0	0.31862	0.379	4663
ChIP-seq	SRP168223	31418686	AT3G48430	EIN6	C2H2	Ler_35S_EIN6FLAG_3d_air_rep2	1.02877	1.69494	2	0.31367	0.3723	5116
ChIP-seq	SRP168223	31418686	AT3G48430	EIN6	C2H2	Ler_35S_EIN6FLAG_3d_air_rep3	1.06006	0.929252	0	0.18956	0.2655	3417
ChIP-seq	SRP168763	31704928	AT2G17950	WUS	HB;WOX	WUS_GR	1.49589	1.68703	2	0.24677	0.3185	5432
ChIP-seq	SRP170031	31519798	AT2G47520	HRE2	AP2-EREBP	C2A_HRE2	1.23637	1.02734	1	0.12269	0.1946	3195
ChIP-seq	SRP171626	32314488	AT3G44290	ANAC060	NAC	ANAC060_Glc	1.05031	0.521674	0	0.03137	0.1033	451
ChIP-seq	SRP171626	32314488	AT3G44290	ANAC060	NAC	ANAC060_YB60GF	1.3081	0.564362	0	0.26018	0.3415	1001
ChIP-seq	SRP172054	31350403	AT3G01460	MBD9	PHD	MBD9	1.03391	0	NA	0.37779	0.4503	5598
ChIP-seq	SRP174372	31113491	AT4G15180	SDG2	SET	SDG2	1.0912	0.546726	0	0.16405	0.1517	1553
ChIP-seq	SRP174372	31113491	AT4G15180	SDG2	SET	SDG2_neg	1.04377	0.176076	-2	0.05413	0.0606	352
ChIP-seq	SRP174484	30256479	AT5G04940	SUVH1	SET	SUVH1	1.0803	1.2538	1	0.22247	0.2386	5044
ChIP-seq	SRP176448	30739798	AT4G13460	SUVH9	SET	SUVH9_SUVH9_fwa	1.01244	0.438568	-1	0.03376	0.0572	745
ChIP-seq	SRP176448	30739798	AT4G13460	SUVH9	SET	SUVH9_SUVH9_fwa_drm12	1.02279	1.57434	2	0.04611	0.0635	1939
ChIP-seq	SRP185777	32414922	AT5G65210	TGA1	bZIP	TGA1	1.17856	0.503682	0	0.11794	0.22	542
ChIP-seq	SRP186499	33432631	AT2G28290	SYD	SNF2	SYD	1.08043	0.515849	0	0.14527	0.1979	3247
ChIP-seq	SRP187331	32284544	AT5G61270	PIF7	bHLH	ZT12_27C	1.0501	0.56996	0	0.02192	0.0799	1052
ChIP-seq	SRP187331	32284544	AT5G61270	PIF7	bHLH	ZT8_17C	1.0356	0.873286	0	0.02387	0.1358	524
ChIP-seq	SRP187331	32284544	AT5G61270	PIF7	bHLH	ZT8_27C	1.06131	0.194217	-2	0.05804	0.0817	590
ChIP-seq	SRP187331	32284544	AT5G61270	PIF7	bHLH	ZT12_17C	1.05665	0.200842	-2	0.05838	0.0675	599
ChIP-seq	SRP187795		AT3G57230	AGL16	MADS	AGL16	1.25234	1.49721	1	0.19501	0.4772	666
ChIP-seq	SRP188198	31701146	AT2G22840	GRF1	GRF	GRF1	1.35262	0.906871	0	0.22825	0.3556	269
ChIP-seq	SRP188198	31701146	AT2G36400	GRF3	GRF	GRF3	1.44607	0.951836	0	0.35057	0.4958	1576
ChIP-seq	SRP191553	33046692	AT4G35900	FD	bZIP	gFD	1.05276	0.867688	0	0.15855	0.1865	3678
ChIP-seq	SRP192399	31988265;31789592	AT1G65330	PHE1	MADS	silique_PHE1	1.0221	0.227143	-2	0.05492	0.0895	1573
ChIP-seq	SRP192706	31105011	AT1G09530	PIF3	bHLH	PIF3_Col0_ZT16	1.02954	0	NA	0.38165	0.4253	5043
ChIP-seq	SRP192706	31105011	AT1G09530	PIF3	bHLH	PIF3_gi_ZT16	1.01748	0	NA	0.22143	0.283	1612
ChIP-seq	SRP193941	31477705	AT2G16390	DRD1	SNF2	DRD1	1.03367	0	NA	0.28023	0.2679	8275
ChIP-seq	SRP201661	32086365	AT5G11260	HY5	bZIP	HY5-VP16_set1	1.07682	0.491017	-1	0.13905	0.19	2349
ChIP-seq	SRP201661	32086365	AT5G11260	HY5	bZIP	HY5-SRDX_set1	1.0863	0.381557	-1	0.09033	0.1479	1241
ChIP-seq	SRP212174	32170290	AT1G32640	MYC2	bHLH	MYC2_JA_2hr	1.02471	7.25067	2	0.22257	0.2053	6362
ChIP-seq	SRP212174	32170290	AT5G46760	MYC3	bHLH	MYC3_JA_2hr	1.0317	1.32523	1	0.18737	0.1806	4567
ChIP-seq	SRP212174	32170290	AT1G27730	STZ	C2H2	STZ_AIR	1.03026	1.00997	1	0.08069	0.1157	599
ChIP-seq	SRP212174	32170290	AT3G15500	ANAC055	NAC	ANAC055_JA_2hr	1.04987	1.02675	1	0.03082	0.0571	634
ChIP-seq	SRP212540		AT3G46640	LUX	G2-like	LUX	1.10496	0.414827	-1	0.11229	0.1789	3892
ChIP-seq	SRP213346	31348568	AT1G32150	bZIP68	bZIP	bZIP68	1.0453	0.0686672	-2	0.29491	0.3436	12930
ChIP-seq	SRP215679	32123177	AT4G24020	NLP7	RWP-RK	NLP7_0min	1.08753	0.335635	-1	0.0669	0.1671	295
ChIP-seq	SRP215679	32123177	AT4G24020	NLP7	RWP-RK	NLP7_10min	1.0668	0.351943	-1	0.07318	0.1308	660
ChIP-seq	SRP215679	32123177	AT4G24020	NLP7	RWP-RK	NLP7_180min	1.05083	0.302476	-1	0.03196	0.0903	171
ChIP-seq	SRP215679	32123177	AT4G24020	NLP7	RWP-RK	NLP7_30min	1.06723	0.401503	-1	0.08356	0.1466	546
ChIP-seq	SRP215679	32123177	AT4G24020	NLP7	RWP-RK	NLP7_5min	1.07881	0.517128	0	0.12741	0.1916	1646
ChIP-seq	SRP216009	32386600	AT2G25180	ARR12	ARR-B	ARR12_Col0	1.03736	0.123098	-2	0.0469	0.0732	601
ChIP-seq	SRP216009	32386600	AT2G25180	ARR12	ARR-B	ARR12_GFP	1.01953	0.220071	-2	0.16529	0.2165	2778
ChIP-seq	SRP222301	31776249	AT3G19860	URI	bHLH	URI_minus_Fe	1.01942	0.0890342	-2	0.11414	0.1695	403
ChIP-seq	SRP222301	31776249	AT3G19860	URI	bHLH	URI_plus_Fe	1.01721	0.0858889	-2	0.19246	0.2637	84
ChIP-seq	SRP222578	32661276	AT4G29000	TCX5	CPP	TCX5_FLAG	1.09204	1.35385	1	0.18496	0.2324	892
ChIP-seq	SRP234632	32279407	AT4G37750	ANT	AP2-EREBP	ANT_neg	1.06857	0.90434	0	0.09763	0.1048	737
ChIP-seq	SRP234632	32279407	AT4G37750	ANT	AP2-EREBP	ANT	1.05211	1.27422	1	0.17118	0.1833	1796
ChIP-seq	SRP238841	32747760	AT2G46020	BRM	SNF2	BRM	1.06062	0.967486	0	0.37045	0.3853	9711
ChIP-seq	SRP249323	32068336	AT3G26744	ICE1	bHLH	ICE1_GFP	1.13399	1.00637	1	0.13797	0.1939	593
ChIP-seq	SRP249704	33270882	AT2G30470	VAL1	ABI3-VP1	VAL1	1.13609	0.952019	0	0.10601	0.1174	1677
ChIP-seq	SRP249704	33270882	AT4G32010	VAL2	ABI3-VP1	VAL2	1.11604	0.920282	0	0.1308	0.1465	4419
ChIP-seq	SRP251989	32183354	AT3G17609	HYH	bZIP	HYH	1.34112	0.987315	0	0.08791	0.0909	695
ChIP-seq	SRP251989	32183354	AT4G36730	GBF1	bZIP	GBF1	1.56057	1.05941	1	0.36711	0.1692	1369
ChIP-seq	SRP251989	32183354	AT4G01120	GBF2	bZIP	GBF2	20	1.00901	1	0.93591	0.8875	8182
ChIP-seq	SRP251989	32183354	AT2G46270	GBF3	bZIP	GBF3	5.77971	1.08572	1	0.89016	0.8991	16986
ChIP-seq	SRP251989	32183354	AT1G03970	GBF4	bZIP	GBF4	2.50697	1.0272	1	0.34918	0.2507	2649
ChIP-seq	SRP251989	32183354	AT2G41070	EEL	bZIP	EEL	10.78	1.04289	1	0.88395	0.8548	10812
ChIP-seq	SRP273009	33864680	AT5G65410	HB25	zf-HD	AtHB25	1.05786	0.178003	-2	0.04659	0.0834	355
ChIP-seq	SRP275654	33604650	AT4G21430	JMJ28	Orphans	JMJ28	1.12797	0.939563	0	0.34399	0.38	6087
ChIP-seq	SRP279734	33888582	AT4G32980	ATH1	HB;TALE	ATH1	1.03402	0.442321	-1	0.07249	0.1148	670
ChIP-seq	SRP287305	33270882	AT4G02020	SWN	SWN	SWN	1.04765	1.42836	1	0.28789	0.3523	4375
ChIP-seq	SRP287305	33270882	AT4G02020	SWN	SWN	SWN_val1val2	1.06399	1.21935	1	0.2556	0.307	4078
ChIP-seq	SRP301264	10.1101/2021.01.23.427869	AT1G05490	CLSY3	SNF2	CLSY3	1.01815	0.444069	-1	0.01255	0.0402	78

## Sheet: Table S3
Supplementary Table 3: TF-miRNA-TF FFLs in Arabidopsis thaliana.
Master regulators			miRNA genes	Target TF genes
Gene ID	Gene name	TF family		Gene ID	Gene name	TF family
AT2G25180	ARR12|RR12	ARR-B	MIR414	AT2G20280		C3H
AT3G16857	ARR1|RR1	ARR-B	MIR414	AT2G20280		C3H
AT4G34000	ABF3|AtABF3|DPBF5	bZIP	MIR414	AT2G20280		C3H
AT5G04340	C2H2|CZF2|ZAT6	C2H2	MIR414	AT2G20280		C3H
AT5G47640	NF-YB2	CCAAT	MIR414	AT2G20280		C3H
AT2G46680	ATHB-7|ATHB7|HB-7	HB	MIR414	AT2G20280		C3H
AT4G37790	HAT22	HB	MIR414	AT2G20280		C3H
AT5G65310	ATHB-5|ATHB5|HB5	HB	MIR414	AT2G20280		C3H
AT1G24260	AGL9|SEP3	MADS	MIR414	AT2G20280		C3H
AT1G22640	ATMYB3|MYB3	MYB	MIR414	AT2G20280		C3H
AT4G27410	ANAC072|RD26	NAC	MIR414	AT2G20280		C3H
AT2G01760	ARR14|RR14	ARR-B	MIR414	AT3G42670	CHR38|CLSY|CLSY1	SNF2
AT2G25180	ARR12|RR12	ARR-B	MIR414	AT3G42670	CHR38|CLSY|CLSY1	SNF2
AT5G67450	AZF1|ZF1	C2H2	MIR414	AT3G42670	CHR38|CLSY|CLSY1	SNF2
AT5G47640	NF-YB2	CCAAT	MIR414	AT3G42670	CHR38|CLSY|CLSY1	SNF2
AT5G18960	FRS12	FAR1	MIR414	AT3G42670	CHR38|CLSY|CLSY1	SNF2
AT5G61850	LFY|LFY3	LFY	MIR414	AT3G42670	CHR38|CLSY|CLSY1	SNF2
AT1G24260	AGL9|SEP3	MADS	MIR414	AT3G42670	CHR38|CLSY|CLSY1	SNF2
AT5G04760		MYB	MIR414	AT3G42670	CHR38|CLSY|CLSY1	SNF2
AT1G01060	LHY|LHY1	MYB-related	MIR414	AT3G42670	CHR38|CLSY|CLSY1	SNF2
AT3G15030	MEE35|TCP4	TCP	MIR414	AT3G42670	CHR38|CLSY|CLSY1	SNF2
AT5G47640	NF-YB2	CCAAT	MIR5021	AT4G32730	ATMYB3R-1|ATMYB3R1|MYB3R-1|MYB3R1|PC-MYB1	MYB
AT2G46680	ATHB-7|ATHB7|HB-7	HB	MIR5021	AT4G32730	ATMYB3R-1|ATMYB3R1|MYB3R-1|MYB3R1|PC-MYB1	MYB
AT1G77300	ASHH2|CCR1|EFS|LAZ2|SDG8	SET	MIR5021	AT4G32730	ATMYB3R-1|ATMYB3R1|MYB3R-1|MYB3R1|PC-MYB1	MYB
AT2G28290	CHR3|SYD	SNF2	MIR5021	AT4G32730	ATMYB3R-1|ATMYB3R1|MYB3R-1|MYB3R1|PC-MYB1	MYB
AT5G17430	BBM	AP2-EREBP	MIR319a	AT1G30210	ATTCP24|TCP24	TCP
AT3G16857	ARR1|RR1	ARR-B	MIR319a	AT1G30210	ATTCP24|TCP24	TCP
AT2G01930	ATBPC1|BBR|BPC1	BBR-BPC	MIR319a	AT1G30210	ATTCP24|TCP24	TCP
AT4G34000	ABF3|AtABF3|DPBF5	bZIP	MIR319a	AT1G30210	ATTCP24|TCP24	TCP
AT5G47640	NF-YB2	CCAAT	MIR319a	AT1G30210	ATTCP24|TCP24	TCP
AT3G20740	FIE|FIE1|FIS3		MIR319a	AT1G30210	ATTCP24|TCP24	TCP
AT2G22430	ATHB6|HB6	HB	MIR319a	AT1G30210	ATTCP24|TCP24	TCP
AT2G46680	ATHB-7|ATHB7|HB-7	HB	MIR319a	AT1G30210	ATTCP24|TCP24	TCP
AT4G37790	HAT22	HB	MIR319a	AT1G30210	ATTCP24|TCP24	TCP
AT5G65310	ATHB-5|ATHB5|HB5	HB	MIR319a	AT1G30210	ATTCP24|TCP24	TCP
AT5G61850	LFY|LFY3	LFY	MIR319a	AT1G30210	ATTCP24|TCP24	TCP
AT1G24260	AGL9|SEP3	MADS	MIR319a	AT1G30210	ATTCP24|TCP24	TCP
AT5G20240	PI	MADS	MIR319a	AT1G30210	ATTCP24|TCP24	TCP
AT5G60910	AGL8|FUL	MADS	MIR319a	AT1G30210	ATTCP24|TCP24	TCP
AT5G67300	ATMYB44|ATMYBR1|MYB44|MYBR1	MYB	MIR319a	AT1G30210	ATTCP24|TCP24	TCP
AT4G02020	EZA1|SDG10|SWN	SET	MIR319a	AT1G30210	ATTCP24|TCP24	TCP
AT2G28290	CHR3|SYD	SNF2	MIR319a	AT1G30210	ATTCP24|TCP24	TCP
AT5G17430	BBM	AP2-EREBP	MIR319b	AT1G30210	ATTCP24|TCP24	TCP
AT3G16857	ARR1|RR1	ARR-B	MIR319b	AT1G30210	ATTCP24|TCP24	TCP
AT1G49720	ABF1|AtABF1	bZIP	MIR319b	AT1G30210	ATTCP24|TCP24	TCP
AT2G46270	GBF3	bZIP	MIR319b	AT1G30210	ATTCP24|TCP24	TCP
AT3G19290	ABF4|AREB2	bZIP	MIR319b	AT1G30210	ATTCP24|TCP24	TCP
AT4G01120	ATBZIP54|GBF2	bZIP	MIR319b	AT1G30210	ATTCP24|TCP24	TCP
AT1G21970	AtLEC1|EMB|EMB212|LEC1|NF-YB9	CCAAT	MIR319b	AT1G30210	ATTCP24|TCP24	TCP
AT1G24260	AGL9|SEP3	MADS	MIR319b	AT1G30210	ATTCP24|TCP24	TCP
AT5G60910	AGL8|FUL	MADS	MIR319b	AT1G30210	ATTCP24|TCP24	TCP
AT4G02020	EZA1|SDG10|SWN	SET	MIR319b	AT1G30210	ATTCP24|TCP24	TCP
AT5G17430	BBM	AP2-EREBP	MIR319c	AT1G30210	ATTCP24|TCP24	TCP
AT2G46270	GBF3	bZIP	MIR319c	AT1G30210	ATTCP24|TCP24	TCP
AT4G01120	ATBZIP54|GBF2	bZIP	MIR319c	AT1G30210	ATTCP24|TCP24	TCP
AT4G34000	ABF3|AtABF3|DPBF5	bZIP	MIR319c	AT1G30210	ATTCP24|TCP24	TCP
AT5G04340	C2H2|CZF2|ZAT6	C2H2	MIR319c	AT1G30210	ATTCP24|TCP24	TCP
AT5G47640	NF-YB2	CCAAT	MIR319c	AT1G30210	ATTCP24|TCP24	TCP
AT3G20740	FIE|FIE1|FIS3		MIR319c	AT1G30210	ATTCP24|TCP24	TCP
AT2G22430	ATHB6|HB6	HB	MIR319c	AT1G30210	ATTCP24|TCP24	TCP
AT2G46680	ATHB-7|ATHB7|HB-7	HB	MIR319c	AT1G30210	ATTCP24|TCP24	TCP
AT4G37790	HAT22	HB	MIR319c	AT1G30210	ATTCP24|TCP24	TCP
AT5G65310	ATHB-5|ATHB5|HB5	HB	MIR319c	AT1G30210	ATTCP24|TCP24	TCP
AT1G24260	AGL9|SEP3	MADS	MIR319c	AT1G30210	ATTCP24|TCP24	TCP
AT5G20240	PI	MADS	MIR319c	AT1G30210	ATTCP24|TCP24	TCP
AT5G60910	AGL8|FUL	MADS	MIR319c	AT1G30210	ATTCP24|TCP24	TCP
AT1G22640	ATMYB3|MYB3	MYB	MIR319c	AT1G30210	ATTCP24|TCP24	TCP
AT5G04760		MYB	MIR319c	AT1G30210	ATTCP24|TCP24	TCP
AT4G02020	EZA1|SDG10|SWN	SET	MIR319c	AT1G30210	ATTCP24|TCP24	TCP
AT5G17430	BBM	AP2-EREBP	MIR167c	AT1G30330	ARF6	ARF
AT2G25180	ARR12|RR12	ARR-B	MIR167c	AT1G30330	ARF6	ARF
AT3G16857	ARR1|RR1	ARR-B	MIR167c	AT1G30330	ARF6	ARF
AT5G53210	SPCH	bHLH	MIR167c	AT1G30330	ARF6	ARF
AT5G67060	HEC1	bHLH	MIR167c	AT1G30330	ARF6	ARF
AT1G49720	ABF1|AtABF1	bZIP	MIR167c	AT1G30330	ARF6	ARF
AT2G41070	ATBZIP12|DPBF4|EEL	bZIP	MIR167c	AT1G30330	ARF6	ARF
AT2G46270	GBF3	bZIP	MIR167c	AT1G30330	ARF6	ARF
AT3G19290	ABF4|AREB2	bZIP	MIR167c	AT1G30330	ARF6	ARF
AT4G01120	ATBZIP54|GBF2	bZIP	MIR167c	AT1G30330	ARF6	ARF
AT4G34000	ABF3|AtABF3|DPBF5	bZIP	MIR167c	AT1G30330	ARF6	ARF
AT5G47640	NF-YB2	CCAAT	MIR167c	AT1G30330	ARF6	ARF
AT2G36010	ATE2FA|E2F3	E2F-DP	MIR167c	AT1G30330	ARF6	ARF
AT3G20740	FIE|FIE1|FIS3		MIR167c	AT1G30330	ARF6	ARF
AT5G16560	KAN|KAN1	G2-like	MIR167c	AT1G30330	ARF6	ARF
AT2G22430	ATHB6|HB6	HB	MIR167c	AT1G30330	ARF6	ARF
AT2G46680	ATHB-7|ATHB7|HB-7	HB	MIR167c	AT1G30330	ARF6	ARF
AT5G04760		MYB	MIR167c	AT1G30330	ARF6	ARF
AT5G67300	ATMYB44|ATMYBR1|MYB44|MYBR1	MYB	MIR167c	AT1G30330	ARF6	ARF
AT1G77450	anac032|NAC032	NAC	MIR167c	AT1G30330	ARF6	ARF
AT4G27410	ANAC072|RD26	NAC	MIR167c	AT1G30330	ARF6	ARF
AT5G63790	ANAC102|NAC102	NAC	MIR167c	AT1G30330	ARF6	ARF
AT4G02020	EZA1|SDG10|SWN	SET	MIR167c	AT1G30330	ARF6	ARF
AT2G16390	CHR35|DMS1|DRD1	SNF2	MIR167c	AT1G30330	ARF6	ARF
AT2G46020	ATBRM|BRM|CHA2|CHR2	SNF2	MIR167c	AT1G30330	ARF6	ARF
AT3G15030	MEE35|TCP4	TCP	MIR167c	AT1G30330	ARF6	ARF
AT2G38470	ATWRKY33|WRKY33	WRKY	MIR167c	AT1G30330	ARF6	ARF
AT4G31800	ATWRKY18|WRKY18	WRKY	MIR167c	AT1G30330	ARF6	ARF
AT4G32010	HSI2-L1|HSL1|VAL2	ABI3-VP1	MIR5658	AT1G34370	AtSTOP1|STOP1	C2H2
AT5G17430	BBM	AP2-EREBP	MIR5658	AT1G34370	AtSTOP1|STOP1	C2H2
AT2G01760	ARR14|RR14	ARR-B	MIR5658	AT1G34370	AtSTOP1|STOP1	C2H2
AT2G25180	ARR12|RR12	ARR-B	MIR5658	AT1G34370	AtSTOP1|STOP1	C2H2
AT3G16857	ARR1|RR1	ARR-B	MIR5658	AT1G34370	AtSTOP1|STOP1	C2H2
AT4G31920	ARR10|RR10	ARR-B	MIR5658	AT1G34370	AtSTOP1|STOP1	C2H2
AT1G09530	PAP3|PIF3|POC1	bHLH	MIR5658	AT1G34370	AtSTOP1|STOP1	C2H2
AT2G43010	AtPIF4|PIF4|SRL2	bHLH	MIR5658	AT1G34370	AtSTOP1|STOP1	C2H2
AT5G46760	MYC3	bHLH	MIR5658	AT1G34370	AtSTOP1|STOP1	C2H2
AT5G53210	SPCH	bHLH	MIR5658	AT1G34370	AtSTOP1|STOP1	C2H2
AT1G32150	AtbZIP68|bZIP68	bZIP	MIR5658	AT1G34370	AtSTOP1|STOP1	C2H2
AT1G49720	ABF1|AtABF1	bZIP	MIR5658	AT1G34370	AtSTOP1|STOP1	C2H2
AT2G46270	GBF3	bZIP	MIR5658	AT1G34370	AtSTOP1|STOP1	C2H2
AT3G19290	ABF4|AREB2	bZIP	MIR5658	AT1G34370	AtSTOP1|STOP1	C2H2
AT4G01120	ATBZIP54|GBF2	bZIP	MIR5658	AT1G34370	AtSTOP1|STOP1	C2H2
AT4G34000	ABF3|AtABF3|DPBF5	bZIP	MIR5658	AT1G34370	AtSTOP1|STOP1	C2H2
AT5G11260	HY5|TED	bZIP	MIR5658	AT1G34370	AtSTOP1|STOP1	C2H2
AT5G56860	GATA21|GNC	C2C2-GATA	MIR5658	AT1G34370	AtSTOP1|STOP1	C2H2
AT5G04340	C2H2|CZF2|ZAT6	C2H2	MIR5658	AT1G34370	AtSTOP1|STOP1	C2H2
AT5G47640	NF-YB2	CCAAT	MIR5658	AT1G34370	AtSTOP1|STOP1	C2H2
AT2G36010	ATE2FA|E2F3	E2F-DP	MIR5658	AT1G34370	AtSTOP1|STOP1	C2H2
AT5G18960	FRS12	FAR1	MIR5658	AT1G34370	AtSTOP1|STOP1	C2H2
AT2G22430	ATHB6|HB6	HB	MIR5658	AT1G34370	AtSTOP1|STOP1	C2H2
AT2G46680	ATHB-7|ATHB7|HB-7	HB	MIR5658	AT1G34370	AtSTOP1|STOP1	C2H2
AT4G37790	HAT22	HB	MIR5658	AT1G34370	AtSTOP1|STOP1	C2H2
AT5G65310	ATHB-5|ATHB5|HB5	HB	MIR5658	AT1G34370	AtSTOP1|STOP1	C2H2
AT5G16820	ATHSF3|ATHSFA1B|HSF3|HSFA1B	HSF	MIR5658	AT1G34370	AtSTOP1|STOP1	C2H2
AT1G22640	ATMYB3|MYB3	MYB	MIR5658	AT1G34370	AtSTOP1|STOP1	C2H2
AT5G04760		MYB	MIR5658	AT1G34370	AtSTOP1|STOP1	C2H2
AT5G67300	ATMYB44|ATMYBR1|MYB44|MYBR1	MYB	MIR5658	AT1G34370	AtSTOP1|STOP1	C2H2
AT1G77450	anac032|NAC032	NAC	MIR5658	AT1G34370	AtSTOP1|STOP1	C2H2
AT4G27410	ANAC072|RD26	NAC	MIR5658	AT1G34370	AtSTOP1|STOP1	C2H2
AT5G63790	ANAC102|NAC102	NAC	MIR5658	AT1G34370	AtSTOP1|STOP1	C2H2
AT4G24020	NLP7	RWP-RK	MIR5658	AT1G34370	AtSTOP1|STOP1	C2H2
AT1G77300	ASHH2|CCR1|EFS|LAZ2|SDG8	SET	MIR5658	AT1G34370	AtSTOP1|STOP1	C2H2
AT2G16390	CHR35|DMS1|DRD1	SNF2	MIR5658	AT1G34370	AtSTOP1|STOP1	C2H2
AT2G28290	CHR3|SYD	SNF2	MIR5658	AT1G34370	AtSTOP1|STOP1	C2H2
AT2G46020	ATBRM|BRM|CHA2|CHR2	SNF2	MIR5658	AT1G34370	AtSTOP1|STOP1	C2H2
AT3G10390	FLD	SWI/SNF-SWI3	MIR5658	AT1G34370	AtSTOP1|STOP1	C2H2
AT4G14720	PPD2|TIFY4B	Tify	MIR5658	AT1G34370	AtSTOP1|STOP1	C2H2
AT3G11100		Trihelix	MIR5658	AT1G34370	AtSTOP1|STOP1	C2H2
AT1G80840	ATWRKY40|WRKY40	WRKY	MIR5658	AT1G34370	AtSTOP1|STOP1	C2H2
AT2G38470	ATWRKY33|WRKY33	WRKY	MIR5658	AT1G34370	AtSTOP1|STOP1	C2H2
AT4G31800	ATWRKY18|WRKY18	WRKY	MIR5658	AT1G34370	AtSTOP1|STOP1	C2H2
AT2G25180	ARR12|RR12	ARR-B	MIR854a	AT1G34370	AtSTOP1|STOP1	C2H2
AT2G46270	GBF3	bZIP	MIR854a	AT1G34370	AtSTOP1|STOP1	C2H2
AT4G01120	ATBZIP54|GBF2	bZIP	MIR854a	AT1G34370	AtSTOP1|STOP1	C2H2
AT4G15180	ATXR3|SDG2	SET	MIR854a	AT1G34370	AtSTOP1|STOP1	C2H2
AT5G04940	SUVH1	SET	MIR854a	AT1G34370	AtSTOP1|STOP1	C2H2
AT4G32010	HSI2-L1|HSL1|VAL2	ABI3-VP1	MIR854b	AT1G34370	AtSTOP1|STOP1	C2H2
AT2G46270	GBF3	bZIP	MIR854b	AT1G34370	AtSTOP1|STOP1	C2H2
AT4G01120	ATBZIP54|GBF2	bZIP	MIR854b	AT1G34370	AtSTOP1|STOP1	C2H2
AT3G20770	AtEIN3|EIN3	EIL	MIR854b	AT1G34370	AtSTOP1|STOP1	C2H2
AT4G15180	ATXR3|SDG2	SET	MIR854b	AT1G34370	AtSTOP1|STOP1	C2H2
AT5G04940	SUVH1	SET	MIR854b	AT1G34370	AtSTOP1|STOP1	C2H2
AT2G46270	GBF3	bZIP	MIR854c	AT1G34370	AtSTOP1|STOP1	C2H2
AT4G01120	ATBZIP54|GBF2	bZIP	MIR854c	AT1G34370	AtSTOP1|STOP1	C2H2
AT3G20770	AtEIN3|EIN3	EIL	MIR854c	AT1G34370	AtSTOP1|STOP1	C2H2
AT4G15180	ATXR3|SDG2	SET	MIR854c	AT1G34370	AtSTOP1|STOP1	C2H2
AT5G04940	SUVH1	SET	MIR854c	AT1G34370	AtSTOP1|STOP1	C2H2
AT2G46270	GBF3	bZIP	MIR854d	AT1G34370	AtSTOP1|STOP1	C2H2
AT4G15180	ATXR3|SDG2	SET	MIR854d	AT1G34370	AtSTOP1|STOP1	C2H2
AT4G32010	HSI2-L1|HSL1|VAL2	ABI3-VP1	MIR854e	AT1G34370	AtSTOP1|STOP1	C2H2
AT2G46270	GBF3	bZIP	MIR854e	AT1G34370	AtSTOP1|STOP1	C2H2
AT4G01120	ATBZIP54|GBF2	bZIP	MIR854e	AT1G34370	AtSTOP1|STOP1	C2H2
AT4G15180	ATXR3|SDG2	SET	MIR854e	AT1G34370	AtSTOP1|STOP1	C2H2
AT5G04940	SUVH1	SET	MIR854e	AT1G34370	AtSTOP1|STOP1	C2H2
AT5G47640	NF-YB2	CCAAT	MIR5021	AT1G59750	ARF1	ARF
AT5G18960	FRS12	FAR1	MIR5021	AT1G59750	ARF1	ARF
AT5G65310	ATHB-5|ATHB5|HB5	HB	MIR5021	AT1G59750	ARF1	ARF
AT1G77300	ASHH2|CCR1|EFS|LAZ2|SDG8	SET	MIR5021	AT1G59750	ARF1	ARF
AT5G04340	C2H2|CZF2|ZAT6	C2H2	MIR5021	AT1G77640		AP2-EREBP
AT5G47640	NF-YB2	CCAAT	MIR5021	AT1G77640		AP2-EREBP
AT5G18960	FRS12	FAR1	MIR5021	AT1G77640		AP2-EREBP
AT2G46680	ATHB-7|ATHB7|HB-7	HB	MIR5021	AT1G77640		AP2-EREBP
AT4G37790	HAT22	HB	MIR5021	AT1G77640		AP2-EREBP
AT5G65310	ATHB-5|ATHB5|HB5	HB	MIR5021	AT1G77640		AP2-EREBP
AT2G28290	CHR3|SYD	SNF2	MIR5021	AT1G77640		AP2-EREBP
AT5G17430	BBM	AP2-EREBP	MIR5641	AT1G77640		AP2-EREBP
AT2G25180	ARR12|RR12	ARR-B	MIR5641	AT1G77640		AP2-EREBP
AT5G11260	HY5|TED	bZIP	MIR5641	AT1G77640		AP2-EREBP
AT5G18960	FRS12	FAR1	MIR5641	AT1G77640		AP2-EREBP
AT3G58190	ASL16|LBD29	LBD	MIR5641	AT1G77640		AP2-EREBP
AT1G24260	AGL9|SEP3	MADS	MIR5641	AT1G77640		AP2-EREBP
AT4G22140	EBS	PHD	MIR5641	AT1G77640		AP2-EREBP
AT3G15030	MEE35|TCP4	TCP	MIR5641	AT1G77640		AP2-EREBP
AT2G46270	GBF3	bZIP	MIR5650	AT2G31280	CPUORF7	bHLH
AT2G28290	CHR3|SYD	SNF2	MIR5650	AT2G31280	CPUORF7	bHLH
AT5G47640	NF-YB2	CCAAT	MIR5021	AT2G31380	BBX25|STH	Orphans
AT5G65310	ATHB-5|ATHB5|HB5	HB	MIR5021	AT2G31380	BBX25|STH	Orphans
AT1G77300	ASHH2|CCR1|EFS|LAZ2|SDG8	SET	MIR5021	AT2G31380	BBX25|STH	Orphans
AT5G17430	BBM	AP2-EREBP	MIR165a	AT2G34710	ATHB-14|ATHB14|PHB|PHB-1D	HB
AT2G01760	ARR14|RR14	ARR-B	MIR165a	AT2G34710	ATHB-14|ATHB14|PHB|PHB-1D	HB
AT3G16857	ARR1|RR1	ARR-B	MIR165a	AT2G34710	ATHB-14|ATHB14|PHB|PHB-1D	HB
AT2G01930	ATBPC1|BBR|BPC1	BBR-BPC	MIR165a	AT2G34710	ATHB-14|ATHB14|PHB|PHB-1D	HB
AT5G53210	SPCH	bHLH	MIR165a	AT2G34710	ATHB-14|ATHB14|PHB|PHB-1D	HB
AT1G49720	ABF1|AtABF1	bZIP	MIR165a	AT2G34710	ATHB-14|ATHB14|PHB|PHB-1D	HB
AT2G46270	GBF3	bZIP	MIR165a	AT2G34710	ATHB-14|ATHB14|PHB|PHB-1D	HB
AT3G19290	ABF4|AREB2	bZIP	MIR165a	AT2G34710	ATHB-14|ATHB14|PHB|PHB-1D	HB
AT4G01120	ATBZIP54|GBF2	bZIP	MIR165a	AT2G34710	ATHB-14|ATHB14|PHB|PHB-1D	HB
AT4G34000	ABF3|AtABF3|DPBF5	bZIP	MIR165a	AT2G34710	ATHB-14|ATHB14|PHB|PHB-1D	HB
AT5G11260	HY5|TED	bZIP	MIR165a	AT2G34710	ATHB-14|ATHB14|PHB|PHB-1D	HB
AT5G04340	C2H2|CZF2|ZAT6	C2H2	MIR165a	AT2G34710	ATHB-14|ATHB14|PHB|PHB-1D	HB
AT5G47640	NF-YB2	CCAAT	MIR165a	AT2G34710	ATHB-14|ATHB14|PHB|PHB-1D	HB
AT3G20740	FIE|FIE1|FIS3		MIR165a	AT2G34710	ATHB-14|ATHB14|PHB|PHB-1D	HB
AT4G37790	HAT22	HB	MIR165a	AT2G34710	ATHB-14|ATHB14|PHB|PHB-1D	HB
AT5G02030	BLH9|BLR|HB-6|LSN|PNY|RPL|VAN	HB	MIR165a	AT2G34710	ATHB-14|ATHB14|PHB|PHB-1D	HB
AT5G65310	ATHB-5|ATHB5|HB5	HB	MIR165a	AT2G34710	ATHB-14|ATHB14|PHB|PHB-1D	HB
AT1G24260	AGL9|SEP3	MADS	MIR165a	AT2G34710	ATHB-14|ATHB14|PHB|PHB-1D	HB
AT5G60910	AGL8|FUL	MADS	MIR165a	AT2G34710	ATHB-14|ATHB14|PHB|PHB-1D	HB
AT1G22640	ATMYB3|MYB3	MYB	MIR165a	AT2G34710	ATHB-14|ATHB14|PHB|PHB-1D	HB
AT5G04760		MYB	MIR165a	AT2G34710	ATHB-14|ATHB14|PHB|PHB-1D	HB
AT5G67300	ATMYB44|ATMYBR1|MYB44|MYBR1	MYB	MIR165a	AT2G34710	ATHB-14|ATHB14|PHB|PHB-1D	HB
AT1G49950	ATTRB1|TRB1	MYB-related	MIR165a	AT2G34710	ATHB-14|ATHB14|PHB|PHB-1D	HB
AT1G80840	ATWRKY40|WRKY40	WRKY	MIR165a	AT2G34710	ATHB-14|ATHB14|PHB|PHB-1D	HB
AT2G38470	ATWRKY33|WRKY33	WRKY	MIR165a	AT2G34710	ATHB-14|ATHB14|PHB|PHB-1D	HB
AT4G31800	ATWRKY18|WRKY18	WRKY	MIR165a	AT2G34710	ATHB-14|ATHB14|PHB|PHB-1D	HB
AT4G37750	ANT|CKC|CKC1|DRG	AP2-EREBP	MIR165b	AT2G34710	ATHB-14|ATHB14|PHB|PHB-1D	HB
AT5G17430	BBM	AP2-EREBP	MIR165b	AT2G34710	ATHB-14|ATHB14|PHB|PHB-1D	HB
AT2G01760	ARR14|RR14	ARR-B	MIR165b	AT2G34710	ATHB-14|ATHB14|PHB|PHB-1D	HB
AT2G01930	ATBPC1|BBR|BPC1	BBR-BPC	MIR165b	AT2G34710	ATHB-14|ATHB14|PHB|PHB-1D	HB
AT5G53210	SPCH	bHLH	MIR165b	AT2G34710	ATHB-14|ATHB14|PHB|PHB-1D	HB
AT5G56860	GATA21|GNC	C2C2-GATA	MIR165b	AT2G34710	ATHB-14|ATHB14|PHB|PHB-1D	HB
AT5G04340	C2H2|CZF2|ZAT6	C2H2	MIR165b	AT2G34710	ATHB-14|ATHB14|PHB|PHB-1D	HB
AT5G47640	NF-YB2	CCAAT	MIR165b	AT2G34710	ATHB-14|ATHB14|PHB|PHB-1D	HB
AT5G18960	FRS12	FAR1	MIR165b	AT2G34710	ATHB-14|ATHB14|PHB|PHB-1D	HB
AT3G20740	FIE|FIE1|FIS3		MIR165b	AT2G34710	ATHB-14|ATHB14|PHB|PHB-1D	HB
AT2G01570	RGA|RGA1	GRAS	MIR165b	AT2G34710	ATHB-14|ATHB14|PHB|PHB-1D	HB
AT4G37790	HAT22	HB	MIR165b	AT2G34710	ATHB-14|ATHB14|PHB|PHB-1D	HB
AT5G02030	BLH9|BLR|HB-6|LSN|PNY|RPL|VAN	HB	MIR165b	AT2G34710	ATHB-14|ATHB14|PHB|PHB-1D	HB
AT5G65310	ATHB-5|ATHB5|HB5	HB	MIR165b	AT2G34710	ATHB-14|ATHB14|PHB|PHB-1D	HB
AT5G16820	ATHSF3|ATHSFA1B|HSF3|HSFA1B	HSF	MIR165b	AT2G34710	ATHB-14|ATHB14|PHB|PHB-1D	HB
AT1G24260	AGL9|SEP3	MADS	MIR165b	AT2G34710	ATHB-14|ATHB14|PHB|PHB-1D	HB
AT1G69120	AGL7|AP1	MADS	MIR165b	AT2G34710	ATHB-14|ATHB14|PHB|PHB-1D	HB
AT5G60910	AGL8|FUL	MADS	MIR165b	AT2G34710	ATHB-14|ATHB14|PHB|PHB-1D	HB
AT1G22640	ATMYB3|MYB3	MYB	MIR165b	AT2G34710	ATHB-14|ATHB14|PHB|PHB-1D	HB
AT5G04760		MYB	MIR165b	AT2G34710	ATHB-14|ATHB14|PHB|PHB-1D	HB
AT1G01060	LHY|LHY1	MYB-related	MIR165b	AT2G34710	ATHB-14|ATHB14|PHB|PHB-1D	HB
AT3G01460	ATMBD9|MBD9	PHD	MIR165b	AT2G34710	ATHB-14|ATHB14|PHB|PHB-1D	HB
AT1G80840	ATWRKY40|WRKY40	WRKY	MIR165b	AT2G34710	ATHB-14|ATHB14|PHB|PHB-1D	HB
AT2G38470	ATWRKY33|WRKY33	WRKY	MIR165b	AT2G34710	ATHB-14|ATHB14|PHB|PHB-1D	HB
AT4G31800	ATWRKY18|WRKY18	WRKY	MIR165b	AT2G34710	ATHB-14|ATHB14|PHB|PHB-1D	HB
AT4G32010	HSI2-L1|HSL1|VAL2	ABI3-VP1	MIR166a	AT2G34710	ATHB-14|ATHB14|PHB|PHB-1D	HB
AT5G17430	BBM	AP2-EREBP	MIR166a	AT2G34710	ATHB-14|ATHB14|PHB|PHB-1D	HB
AT2G01760	ARR14|RR14	ARR-B	MIR166a	AT2G34710	ATHB-14|ATHB14|PHB|PHB-1D	HB
AT3G16857	ARR1|RR1	ARR-B	MIR166a	AT2G34710	ATHB-14|ATHB14|PHB|PHB-1D	HB
AT4G31920	ARR10|RR10	ARR-B	MIR166a	AT2G34710	ATHB-14|ATHB14|PHB|PHB-1D	HB
AT2G01930	ATBPC1|BBR|BPC1	BBR-BPC	MIR166a	AT2G34710	ATHB-14|ATHB14|PHB|PHB-1D	HB
AT5G42520	ATBPC6|BBR/BPC6|BPC6	BBR-BPC	MIR166a	AT2G34710	ATHB-14|ATHB14|PHB|PHB-1D	HB
AT1G09530	PAP3|PIF3|POC1	bHLH	MIR166a	AT2G34710	ATHB-14|ATHB14|PHB|PHB-1D	HB
AT1G32640	ATMYC2|JAI1|JIN1|MYC2|RD22BP1|ZBF1	bHLH	MIR166a	AT2G34710	ATHB-14|ATHB14|PHB|PHB-1D	HB
AT1G51140	FBH3	bHLH	MIR166a	AT2G34710	ATHB-14|ATHB14|PHB|PHB-1D	HB
AT2G43010	AtPIF4|PIF4|SRL2	bHLH	MIR166a	AT2G34710	ATHB-14|ATHB14|PHB|PHB-1D	HB
AT5G53210	SPCH	bHLH	MIR166a	AT2G34710	ATHB-14|ATHB14|PHB|PHB-1D	HB
AT5G67060	HEC1	bHLH	MIR166a	AT2G34710	ATHB-14|ATHB14|PHB|PHB-1D	HB
AT1G49720	ABF1|AtABF1	bZIP	MIR166a	AT2G34710	ATHB-14|ATHB14|PHB|PHB-1D	HB
AT2G46270	GBF3	bZIP	MIR166a	AT2G34710	ATHB-14|ATHB14|PHB|PHB-1D	HB
AT3G19290	ABF4|AREB2	bZIP	MIR166a	AT2G34710	ATHB-14|ATHB14|PHB|PHB-1D	HB
AT4G01120	ATBZIP54|GBF2	bZIP	MIR166a	AT2G34710	ATHB-14|ATHB14|PHB|PHB-1D	HB
AT4G34000	ABF3|AtABF3|DPBF5	bZIP	MIR166a	AT2G34710	ATHB-14|ATHB14|PHB|PHB-1D	HB
AT5G11260	HY5|TED	bZIP	MIR166a	AT2G34710	ATHB-14|ATHB14|PHB|PHB-1D	HB
AT5G56860	GATA21|GNC	C2C2-GATA	MIR166a	AT2G34710	ATHB-14|ATHB14|PHB|PHB-1D	HB
AT5G04340	C2H2|CZF2|ZAT6	C2H2	MIR166a	AT2G34710	ATHB-14|ATHB14|PHB|PHB-1D	HB
AT1G21970	AtLEC1|EMB|EMB212|LEC1|NF-YB9	CCAAT	MIR166a	AT2G34710	ATHB-14|ATHB14|PHB|PHB-1D	HB
AT1G56170	ATHAP5B|HAP5B|NF-YC2	CCAAT	MIR166a	AT2G34710	ATHB-14|ATHB14|PHB|PHB-1D	HB
AT5G47640	NF-YB2	CCAAT	MIR166a	AT2G34710	ATHB-14|ATHB14|PHB|PHB-1D	HB
AT5G18960	FRS12	FAR1	MIR166a	AT2G34710	ATHB-14|ATHB14|PHB|PHB-1D	HB
AT3G20740	FIE|FIE1|FIS3		MIR166a	AT2G34710	ATHB-14|ATHB14|PHB|PHB-1D	HB
AT2G01570	RGA|RGA1	GRAS	MIR166a	AT2G34710	ATHB-14|ATHB14|PHB|PHB-1D	HB
AT2G17950	PGA6|WUS|WUS1	HB	MIR166a	AT2G34710	ATHB-14|ATHB14|PHB|PHB-1D	HB
AT2G46680	ATHB-7|ATHB7|HB-7	HB	MIR166a	AT2G34710	ATHB-14|ATHB14|PHB|PHB-1D	HB
AT4G37790	HAT22	HB	MIR166a	AT2G34710	ATHB-14|ATHB14|PHB|PHB-1D	HB
AT5G60690	IFL|IFL1|REV	HB	MIR166a	AT2G34710	ATHB-14|ATHB14|PHB|PHB-1D	HB
AT5G65310	ATHB-5|ATHB5|HB5	HB	MIR166a	AT2G34710	ATHB-14|ATHB14|PHB|PHB-1D	HB
AT5G61850	LFY|LFY3	LFY	MIR166a	AT2G34710	ATHB-14|ATHB14|PHB|PHB-1D	HB
AT1G24260	AGL9|SEP3	MADS	MIR166a	AT2G34710	ATHB-14|ATHB14|PHB|PHB-1D	HB
AT5G60910	AGL8|FUL	MADS	MIR166a	AT2G34710	ATHB-14|ATHB14|PHB|PHB-1D	HB
AT1G22640	ATMYB3|MYB3	MYB	MIR166a	AT2G34710	ATHB-14|ATHB14|PHB|PHB-1D	HB
AT5G04760		MYB	MIR166a	AT2G34710	ATHB-14|ATHB14|PHB|PHB-1D	HB
AT5G67300	ATMYB44|ATMYBR1|MYB44|MYBR1	MYB	MIR166a	AT2G34710	ATHB-14|ATHB14|PHB|PHB-1D	HB
AT1G01060	LHY|LHY1	MYB-related	MIR166a	AT2G34710	ATHB-14|ATHB14|PHB|PHB-1D	HB
AT1G49950	ATTRB1|TRB1	MYB-related	MIR166a	AT2G34710	ATHB-14|ATHB14|PHB|PHB-1D	HB
AT1G77450	anac032|NAC032	NAC	MIR166a	AT2G34710	ATHB-14|ATHB14|PHB|PHB-1D	HB
AT4G27410	ANAC072|RD26	NAC	MIR166a	AT2G34710	ATHB-14|ATHB14|PHB|PHB-1D	HB
AT5G63790	ANAC102|NAC102	NAC	MIR166a	AT2G34710	ATHB-14|ATHB14|PHB|PHB-1D	HB
AT4G22140	EBS	PHD	MIR166a	AT2G34710	ATHB-14|ATHB14|PHB|PHB-1D	HB
AT5G24470	APRR5|PRR5	Pseudo ARR-B	MIR166a	AT2G34710	ATHB-14|ATHB14|PHB|PHB-1D	HB
AT4G13460	SDG22|SET22|SUVH9	SET	MIR166a	AT2G34710	ATHB-14|ATHB14|PHB|PHB-1D	HB
AT2G46020	ATBRM|BRM|CHA2|CHR2	SNF2	MIR166a	AT2G34710	ATHB-14|ATHB14|PHB|PHB-1D	HB
AT3G10390	FLD	SWI/SNF-SWI3	MIR166a	AT2G34710	ATHB-14|ATHB14|PHB|PHB-1D	HB
AT4G16310	LDL3	SWI/SNF-SWI3	MIR166a	AT2G34710	ATHB-14|ATHB14|PHB|PHB-1D	HB
AT1G80840	ATWRKY40|WRKY40	WRKY	MIR166a	AT2G34710	ATHB-14|ATHB14|PHB|PHB-1D	HB
AT2G38470	ATWRKY33|WRKY33	WRKY	MIR166a	AT2G34710	ATHB-14|ATHB14|PHB|PHB-1D	HB
AT4G31800	ATWRKY18|WRKY18	WRKY	MIR166a	AT2G34710	ATHB-14|ATHB14|PHB|PHB-1D	HB
AT2G30470	HSI2|VAL1	ABI3-VP1	MIR166b	AT2G34710	ATHB-14|ATHB14|PHB|PHB-1D	HB
AT4G32010	HSI2-L1|HSL1|VAL2	ABI3-VP1	MIR166b	AT2G34710	ATHB-14|ATHB14|PHB|PHB-1D	HB
AT4G37750	ANT|CKC|CKC1|DRG	AP2-EREBP	MIR166b	AT2G34710	ATHB-14|ATHB14|PHB|PHB-1D	HB
AT5G17430	BBM	AP2-EREBP	MIR166b	AT2G34710	ATHB-14|ATHB14|PHB|PHB-1D	HB
AT2G01760	ARR14|RR14	ARR-B	MIR166b	AT2G34710	ATHB-14|ATHB14|PHB|PHB-1D	HB
AT3G16857	ARR1|RR1	ARR-B	MIR166b	AT2G34710	ATHB-14|ATHB14|PHB|PHB-1D	HB
AT5G42520	ATBPC6|BBR/BPC6|BPC6	BBR-BPC	MIR166b	AT2G34710	ATHB-14|ATHB14|PHB|PHB-1D	HB
AT5G53210	SPCH	bHLH	MIR166b	AT2G34710	ATHB-14|ATHB14|PHB|PHB-1D	HB
AT5G67060	HEC1	bHLH	MIR166b	AT2G34710	ATHB-14|ATHB14|PHB|PHB-1D	HB
AT1G49720	ABF1|AtABF1	bZIP	MIR166b	AT2G34710	ATHB-14|ATHB14|PHB|PHB-1D	HB
AT2G46270	GBF3	bZIP	MIR166b	AT2G34710	ATHB-14|ATHB14|PHB|PHB-1D	HB
AT4G34000	ABF3|AtABF3|DPBF5	bZIP	MIR166b	AT2G34710	ATHB-14|ATHB14|PHB|PHB-1D	HB
AT5G11260	HY5|TED	bZIP	MIR166b	AT2G34710	ATHB-14|ATHB14|PHB|PHB-1D	HB
AT5G04340	C2H2|CZF2|ZAT6	C2H2	MIR166b	AT2G34710	ATHB-14|ATHB14|PHB|PHB-1D	HB
AT5G67450	AZF1|ZF1	C2H2	MIR166b	AT2G34710	ATHB-14|ATHB14|PHB|PHB-1D	HB
AT1G21970	AtLEC1|EMB|EMB212|LEC1|NF-YB9	CCAAT	MIR166b	AT2G34710	ATHB-14|ATHB14|PHB|PHB-1D	HB
AT5G47640	NF-YB2	CCAAT	MIR166b	AT2G34710	ATHB-14|ATHB14|PHB|PHB-1D	HB
AT3G20740	FIE|FIE1|FIS3		MIR166b	AT2G34710	ATHB-14|ATHB14|PHB|PHB-1D	HB
AT5G16560	KAN|KAN1	G2-like	MIR166b	AT2G34710	ATHB-14|ATHB14|PHB|PHB-1D	HB
AT2G01570	RGA|RGA1	GRAS	MIR166b	AT2G34710	ATHB-14|ATHB14|PHB|PHB-1D	HB
AT4G37790	HAT22	HB	MIR166b	AT2G34710	ATHB-14|ATHB14|PHB|PHB-1D	HB
AT5G02030	BLH9|BLR|HB-6|LSN|PNY|RPL|VAN	HB	MIR166b	AT2G34710	ATHB-14|ATHB14|PHB|PHB-1D	HB
AT5G65310	ATHB-5|ATHB5|HB5	HB	MIR166b	AT2G34710	ATHB-14|ATHB14|PHB|PHB-1D	HB
AT1G24260	AGL9|SEP3	MADS	MIR166b	AT2G34710	ATHB-14|ATHB14|PHB|PHB-1D	HB
AT1G69120	AGL7|AP1	MADS	MIR166b	AT2G34710	ATHB-14|ATHB14|PHB|PHB-1D	HB
AT4G18960	AG	MADS	MIR166b	AT2G34710	ATHB-14|ATHB14|PHB|PHB-1D	HB
AT5G20240	PI	MADS	MIR166b	AT2G34710	ATHB-14|ATHB14|PHB|PHB-1D	HB
AT5G60910	AGL8|FUL	MADS	MIR166b	AT2G34710	ATHB-14|ATHB14|PHB|PHB-1D	HB
AT5G04760		MYB	MIR166b	AT2G34710	ATHB-14|ATHB14|PHB|PHB-1D	HB
AT4G27410	ANAC072|RD26	NAC	MIR166b	AT2G34710	ATHB-14|ATHB14|PHB|PHB-1D	HB
AT2G46020	ATBRM|BRM|CHA2|CHR2	SNF2	MIR166b	AT2G34710	ATHB-14|ATHB14|PHB|PHB-1D	HB
AT3G10390	FLD	SWI/SNF-SWI3	MIR166b	AT2G34710	ATHB-14|ATHB14|PHB|PHB-1D	HB
AT1G80840	ATWRKY40|WRKY40	WRKY	MIR166b	AT2G34710	ATHB-14|ATHB14|PHB|PHB-1D	HB
AT2G38470	ATWRKY33|WRKY33	WRKY	MIR166b	AT2G34710	ATHB-14|ATHB14|PHB|PHB-1D	HB
AT4G31800	ATWRKY18|WRKY18	WRKY	MIR166b	AT2G34710	ATHB-14|ATHB14|PHB|PHB-1D	HB
AT5G17430	BBM	AP2-EREBP	MIR166c	AT2G34710	ATHB-14|ATHB14|PHB|PHB-1D	HB
AT2G01760	ARR14|RR14	ARR-B	MIR166c	AT2G34710	ATHB-14|ATHB14|PHB|PHB-1D	HB
AT3G16857	ARR1|RR1	ARR-B	MIR166c	AT2G34710	ATHB-14|ATHB14|PHB|PHB-1D	HB
AT4G31920	ARR10|RR10	ARR-B	MIR166c	AT2G34710	ATHB-14|ATHB14|PHB|PHB-1D	HB
AT5G53210	SPCH	bHLH	MIR166c	AT2G34710	ATHB-14|ATHB14|PHB|PHB-1D	HB
AT5G67060	HEC1	bHLH	MIR166c	AT2G34710	ATHB-14|ATHB14|PHB|PHB-1D	HB
AT1G49720	ABF1|AtABF1	bZIP	MIR166c	AT2G34710	ATHB-14|ATHB14|PHB|PHB-1D	HB
AT3G19290	ABF4|AREB2	bZIP	MIR166c	AT2G34710	ATHB-14|ATHB14|PHB|PHB-1D	HB
AT4G01120	ATBZIP54|GBF2	bZIP	MIR166c	AT2G34710	ATHB-14|ATHB14|PHB|PHB-1D	HB
AT4G34000	ABF3|AtABF3|DPBF5	bZIP	MIR166c	AT2G34710	ATHB-14|ATHB14|PHB|PHB-1D	HB
AT4G35900	atbzip14|FD|FD-1	bZIP	MIR166c	AT2G34710	ATHB-14|ATHB14|PHB|PHB-1D	HB
AT5G56860	GATA21|GNC	C2C2-GATA	MIR166c	AT2G34710	ATHB-14|ATHB14|PHB|PHB-1D	HB
AT5G04340	C2H2|CZF2|ZAT6	C2H2	MIR166c	AT2G34710	ATHB-14|ATHB14|PHB|PHB-1D	HB
AT5G18960	FRS12	FAR1	MIR166c	AT2G34710	ATHB-14|ATHB14|PHB|PHB-1D	HB
AT3G20740	FIE|FIE1|FIS3		MIR166c	AT2G34710	ATHB-14|ATHB14|PHB|PHB-1D	HB
AT2G01570	RGA|RGA1	GRAS	MIR166c	AT2G34710	ATHB-14|ATHB14|PHB|PHB-1D	HB
AT2G46680	ATHB-7|ATHB7|HB-7	HB	MIR166c	AT2G34710	ATHB-14|ATHB14|PHB|PHB-1D	HB
AT4G37790	HAT22	HB	MIR166c	AT2G34710	ATHB-14|ATHB14|PHB|PHB-1D	HB
AT5G02030	BLH9|BLR|HB-6|LSN|PNY|RPL|VAN	HB	MIR166c	AT2G34710	ATHB-14|ATHB14|PHB|PHB-1D	HB
AT5G65310	ATHB-5|ATHB5|HB5	HB	MIR166c	AT2G34710	ATHB-14|ATHB14|PHB|PHB-1D	HB
AT5G16820	ATHSF3|ATHSFA1B|HSF3|HSFA1B	HSF	MIR166c	AT2G34710	ATHB-14|ATHB14|PHB|PHB-1D	HB
AT1G24260	AGL9|SEP3	MADS	MIR166c	AT2G34710	ATHB-14|ATHB14|PHB|PHB-1D	HB
AT1G69120	AGL7|AP1	MADS	MIR166c	AT2G34710	ATHB-14|ATHB14|PHB|PHB-1D	HB
AT3G54340	AP3|ATAP3	MADS	MIR166c	AT2G34710	ATHB-14|ATHB14|PHB|PHB-1D	HB
AT4G18960	AG	MADS	MIR166c	AT2G34710	ATHB-14|ATHB14|PHB|PHB-1D	HB
AT5G20240	PI	MADS	MIR166c	AT2G34710	ATHB-14|ATHB14|PHB|PHB-1D	HB
AT5G60910	AGL8|FUL	MADS	MIR166c	AT2G34710	ATHB-14|ATHB14|PHB|PHB-1D	HB
AT1G22640	ATMYB3|MYB3	MYB	MIR166c	AT2G34710	ATHB-14|ATHB14|PHB|PHB-1D	HB
AT5G04760		MYB	MIR166c	AT2G34710	ATHB-14|ATHB14|PHB|PHB-1D	HB
AT5G67300	ATMYB44|ATMYBR1|MYB44|MYBR1	MYB	MIR166c	AT2G34710	ATHB-14|ATHB14|PHB|PHB-1D	HB
AT1G01060	LHY|LHY1	MYB-related	MIR166c	AT2G34710	ATHB-14|ATHB14|PHB|PHB-1D	HB
AT4G27410	ANAC072|RD26	NAC	MIR166c	AT2G34710	ATHB-14|ATHB14|PHB|PHB-1D	HB
AT3G01460	ATMBD9|MBD9	PHD	MIR166c	AT2G34710	ATHB-14|ATHB14|PHB|PHB-1D	HB
AT1G80840	ATWRKY40|WRKY40	WRKY	MIR166c	AT2G34710	ATHB-14|ATHB14|PHB|PHB-1D	HB
AT2G38470	ATWRKY33|WRKY33	WRKY	MIR166c	AT2G34710	ATHB-14|ATHB14|PHB|PHB-1D	HB
AT4G31800	ATWRKY18|WRKY18	WRKY	MIR166c	AT2G34710	ATHB-14|ATHB14|PHB|PHB-1D	HB
AT5G17430	BBM	AP2-EREBP	MIR166d	AT2G34710	ATHB-14|ATHB14|PHB|PHB-1D	HB
AT2G01760	ARR14|RR14	ARR-B	MIR166d	AT2G34710	ATHB-14|ATHB14|PHB|PHB-1D	HB
AT3G16857	ARR1|RR1	ARR-B	MIR166d	AT2G34710	ATHB-14|ATHB14|PHB|PHB-1D	HB
AT4G31920	ARR10|RR10	ARR-B	MIR166d	AT2G34710	ATHB-14|ATHB14|PHB|PHB-1D	HB
AT5G53210	SPCH	bHLH	MIR166d	AT2G34710	ATHB-14|ATHB14|PHB|PHB-1D	HB
AT5G67060	HEC1	bHLH	MIR166d	AT2G34710	ATHB-14|ATHB14|PHB|PHB-1D	HB
AT1G49720	ABF1|AtABF1	bZIP	MIR166d	AT2G34710	ATHB-14|ATHB14|PHB|PHB-1D	HB
AT3G19290	ABF4|AREB2	bZIP	MIR166d	AT2G34710	ATHB-14|ATHB14|PHB|PHB-1D	HB
AT4G01120	ATBZIP54|GBF2	bZIP	MIR166d	AT2G34710	ATHB-14|ATHB14|PHB|PHB-1D	HB
AT4G34000	ABF3|AtABF3|DPBF5	bZIP	MIR166d	AT2G34710	ATHB-14|ATHB14|PHB|PHB-1D	HB
AT4G35900	atbzip14|FD|FD-1	bZIP	MIR166d	AT2G34710	ATHB-14|ATHB14|PHB|PHB-1D	HB
AT5G56860	GATA21|GNC	C2C2-GATA	MIR166d	AT2G34710	ATHB-14|ATHB14|PHB|PHB-1D	HB
AT5G04340	C2H2|CZF2|ZAT6	C2H2	MIR166d	AT2G34710	ATHB-14|ATHB14|PHB|PHB-1D	HB
AT5G18960	FRS12	FAR1	MIR166d	AT2G34710	ATHB-14|ATHB14|PHB|PHB-1D	HB
AT3G20740	FIE|FIE1|FIS3		MIR166d	AT2G34710	ATHB-14|ATHB14|PHB|PHB-1D	HB
AT2G01570	RGA|RGA1	GRAS	MIR166d	AT2G34710	ATHB-14|ATHB14|PHB|PHB-1D	HB
AT2G46680	ATHB-7|ATHB7|HB-7	HB	MIR166d	AT2G34710	ATHB-14|ATHB14|PHB|PHB-1D	HB
AT4G37790	HAT22	HB	MIR166d	AT2G34710	ATHB-14|ATHB14|PHB|PHB-1D	HB
AT5G02030	BLH9|BLR|HB-6|LSN|PNY|RPL|VAN	HB	MIR166d	AT2G34710	ATHB-14|ATHB14|PHB|PHB-1D	HB
AT5G65310	ATHB-5|ATHB5|HB5	HB	MIR166d	AT2G34710	ATHB-14|ATHB14|PHB|PHB-1D	HB
AT5G16820	ATHSF3|ATHSFA1B|HSF3|HSFA1B	HSF	MIR166d	AT2G34710	ATHB-14|ATHB14|PHB|PHB-1D	HB
AT1G24260	AGL9|SEP3	MADS	MIR166d	AT2G34710	ATHB-14|ATHB14|PHB|PHB-1D	HB
AT1G69120	AGL7|AP1	MADS	MIR166d	AT2G34710	ATHB-14|ATHB14|PHB|PHB-1D	HB
AT3G54340	AP3|ATAP3	MADS	MIR166d	AT2G34710	ATHB-14|ATHB14|PHB|PHB-1D	HB
AT4G18960	AG	MADS	MIR166d	AT2G34710	ATHB-14|ATHB14|PHB|PHB-1D	HB
AT5G20240	PI	MADS	MIR166d	AT2G34710	ATHB-14|ATHB14|PHB|PHB-1D	HB
AT5G60910	AGL8|FUL	MADS	MIR166d	AT2G34710	ATHB-14|ATHB14|PHB|PHB-1D	HB
AT1G22640	ATMYB3|MYB3	MYB	MIR166d	AT2G34710	ATHB-14|ATHB14|PHB|PHB-1D	HB
AT5G04760		MYB	MIR166d	AT2G34710	ATHB-14|ATHB14|PHB|PHB-1D	HB
AT5G67300	ATMYB44|ATMYBR1|MYB44|MYBR1	MYB	MIR166d	AT2G34710	ATHB-14|ATHB14|PHB|PHB-1D	HB
AT1G01060	LHY|LHY1	MYB-related	MIR166d	AT2G34710	ATHB-14|ATHB14|PHB|PHB-1D	HB
AT4G27410	ANAC072|RD26	NAC	MIR166d	AT2G34710	ATHB-14|ATHB14|PHB|PHB-1D	HB
AT3G01460	ATMBD9|MBD9	PHD	MIR166d	AT2G34710	ATHB-14|ATHB14|PHB|PHB-1D	HB
AT1G80840	ATWRKY40|WRKY40	WRKY	MIR166d	AT2G34710	ATHB-14|ATHB14|PHB|PHB-1D	HB
AT2G38470	ATWRKY33|WRKY33	WRKY	MIR166d	AT2G34710	ATHB-14|ATHB14|PHB|PHB-1D	HB
AT4G31800	ATWRKY18|WRKY18	WRKY	MIR166d	AT2G34710	ATHB-14|ATHB14|PHB|PHB-1D	HB
AT3G16857	ARR1|RR1	ARR-B	MIR166e	AT2G34710	ATHB-14|ATHB14|PHB|PHB-1D	HB
AT5G42520	ATBPC6|BBR/BPC6|BPC6	BBR-BPC	MIR166e	AT2G34710	ATHB-14|ATHB14|PHB|PHB-1D	HB
AT1G09530	PAP3|PIF3|POC1	bHLH	MIR166e	AT2G34710	ATHB-14|ATHB14|PHB|PHB-1D	HB
AT2G43010	AtPIF4|PIF4|SRL2	bHLH	MIR166e	AT2G34710	ATHB-14|ATHB14|PHB|PHB-1D	HB
AT5G53210	SPCH	bHLH	MIR166e	AT2G34710	ATHB-14|ATHB14|PHB|PHB-1D	HB
AT5G67060	HEC1	bHLH	MIR166e	AT2G34710	ATHB-14|ATHB14|PHB|PHB-1D	HB
AT4G34000	ABF3|AtABF3|DPBF5	bZIP	MIR166e	AT2G34710	ATHB-14|ATHB14|PHB|PHB-1D	HB
AT4G35610		C2H2	MIR166e	AT2G34710	ATHB-14|ATHB14|PHB|PHB-1D	HB
AT5G04340	C2H2|CZF2|ZAT6	C2H2	MIR166e	AT2G34710	ATHB-14|ATHB14|PHB|PHB-1D	HB
AT5G47640	NF-YB2	CCAAT	MIR166e	AT2G34710	ATHB-14|ATHB14|PHB|PHB-1D	HB
AT5G18960	FRS12	FAR1	MIR166e	AT2G34710	ATHB-14|ATHB14|PHB|PHB-1D	HB
AT3G20740	FIE|FIE1|FIS3		MIR166e	AT2G34710	ATHB-14|ATHB14|PHB|PHB-1D	HB
AT5G16560	KAN|KAN1	G2-like	MIR166e	AT2G34710	ATHB-14|ATHB14|PHB|PHB-1D	HB
AT2G17950	PGA6|WUS|WUS1	HB	MIR166e	AT2G34710	ATHB-14|ATHB14|PHB|PHB-1D	HB
AT2G46680	ATHB-7|ATHB7|HB-7	HB	MIR166e	AT2G34710	ATHB-14|ATHB14|PHB|PHB-1D	HB
AT4G37790	HAT22	HB	MIR166e	AT2G34710	ATHB-14|ATHB14|PHB|PHB-1D	HB
AT5G60690	IFL|IFL1|REV	HB	MIR166e	AT2G34710	ATHB-14|ATHB14|PHB|PHB-1D	HB
AT5G65310	ATHB-5|ATHB5|HB5	HB	MIR166e	AT2G34710	ATHB-14|ATHB14|PHB|PHB-1D	HB
AT1G24260	AGL9|SEP3	MADS	MIR166e	AT2G34710	ATHB-14|ATHB14|PHB|PHB-1D	HB
AT1G22640	ATMYB3|MYB3	MYB	MIR166e	AT2G34710	ATHB-14|ATHB14|PHB|PHB-1D	HB
AT5G04760		MYB	MIR166e	AT2G34710	ATHB-14|ATHB14|PHB|PHB-1D	HB
AT5G67300	ATMYB44|ATMYBR1|MYB44|MYBR1	MYB	MIR166e	AT2G34710	ATHB-14|ATHB14|PHB|PHB-1D	HB
AT1G80840	ATWRKY40|WRKY40	WRKY	MIR166e	AT2G34710	ATHB-14|ATHB14|PHB|PHB-1D	HB
AT2G38470	ATWRKY33|WRKY33	WRKY	MIR166e	AT2G34710	ATHB-14|ATHB14|PHB|PHB-1D	HB
AT4G31800	ATWRKY18|WRKY18	WRKY	MIR166e	AT2G34710	ATHB-14|ATHB14|PHB|PHB-1D	HB
AT4G37750	ANT|CKC|CKC1|DRG	AP2-EREBP	MIR166g	AT2G34710	ATHB-14|ATHB14|PHB|PHB-1D	HB
AT5G17430	BBM	AP2-EREBP	MIR166g	AT2G34710	ATHB-14|ATHB14|PHB|PHB-1D	HB
AT2G01760	ARR14|RR14	ARR-B	MIR166g	AT2G34710	ATHB-14|ATHB14|PHB|PHB-1D	HB
AT3G16857	ARR1|RR1	ARR-B	MIR166g	AT2G34710	ATHB-14|ATHB14|PHB|PHB-1D	HB
AT5G53210	SPCH	bHLH	MIR166g	AT2G34710	ATHB-14|ATHB14|PHB|PHB-1D	HB
AT2G46270	GBF3	bZIP	MIR166g	AT2G34710	ATHB-14|ATHB14|PHB|PHB-1D	HB
AT3G19290	ABF4|AREB2	bZIP	MIR166g	AT2G34710	ATHB-14|ATHB14|PHB|PHB-1D	HB
AT4G01120	ATBZIP54|GBF2	bZIP	MIR166g	AT2G34710	ATHB-14|ATHB14|PHB|PHB-1D	HB
AT4G34000	ABF3|AtABF3|DPBF5	bZIP	MIR166g	AT2G34710	ATHB-14|ATHB14|PHB|PHB-1D	HB
AT4G35900	atbzip14|FD|FD-1	bZIP	MIR166g	AT2G34710	ATHB-14|ATHB14|PHB|PHB-1D	HB
AT5G11260	HY5|TED	bZIP	MIR166g	AT2G34710	ATHB-14|ATHB14|PHB|PHB-1D	HB
AT4G35610		C2H2	MIR166g	AT2G34710	ATHB-14|ATHB14|PHB|PHB-1D	HB
AT5G04340	C2H2|CZF2|ZAT6	C2H2	MIR166g	AT2G34710	ATHB-14|ATHB14|PHB|PHB-1D	HB
AT1G21970	AtLEC1|EMB|EMB212|LEC1|NF-YB9	CCAAT	MIR166g	AT2G34710	ATHB-14|ATHB14|PHB|PHB-1D	HB
AT1G56170	ATHAP5B|HAP5B|NF-YC2	CCAAT	MIR166g	AT2G34710	ATHB-14|ATHB14|PHB|PHB-1D	HB
AT5G47640	NF-YB2	CCAAT	MIR166g	AT2G34710	ATHB-14|ATHB14|PHB|PHB-1D	HB
AT2G01570	RGA|RGA1	GRAS	MIR166g	AT2G34710	ATHB-14|ATHB14|PHB|PHB-1D	HB
AT2G46680	ATHB-7|ATHB7|HB-7	HB	MIR166g	AT2G34710	ATHB-14|ATHB14|PHB|PHB-1D	HB
AT4G37790	HAT22	HB	MIR166g	AT2G34710	ATHB-14|ATHB14|PHB|PHB-1D	HB
AT5G02030	BLH9|BLR|HB-6|LSN|PNY|RPL|VAN	HB	MIR166g	AT2G34710	ATHB-14|ATHB14|PHB|PHB-1D	HB
AT5G65310	ATHB-5|ATHB5|HB5	HB	MIR166g	AT2G34710	ATHB-14|ATHB14|PHB|PHB-1D	HB
AT5G16820	ATHSF3|ATHSFA1B|HSF3|HSFA1B	HSF	MIR166g	AT2G34710	ATHB-14|ATHB14|PHB|PHB-1D	HB
AT1G24260	AGL9|SEP3	MADS	MIR166g	AT2G34710	ATHB-14|ATHB14|PHB|PHB-1D	HB
AT1G69120	AGL7|AP1	MADS	MIR166g	AT2G34710	ATHB-14|ATHB14|PHB|PHB-1D	HB
AT3G54340	AP3|ATAP3	MADS	MIR166g	AT2G34710	ATHB-14|ATHB14|PHB|PHB-1D	HB
AT4G18960	AG	MADS	MIR166g	AT2G34710	ATHB-14|ATHB14|PHB|PHB-1D	HB
AT5G20240	PI	MADS	MIR166g	AT2G34710	ATHB-14|ATHB14|PHB|PHB-1D	HB
AT5G60910	AGL8|FUL	MADS	MIR166g	AT2G34710	ATHB-14|ATHB14|PHB|PHB-1D	HB
AT5G04760		MYB	MIR166g	AT2G34710	ATHB-14|ATHB14|PHB|PHB-1D	HB
AT5G67300	ATMYB44|ATMYBR1|MYB44|MYBR1	MYB	MIR166g	AT2G34710	ATHB-14|ATHB14|PHB|PHB-1D	HB
AT4G27410	ANAC072|RD26	NAC	MIR166g	AT2G34710	ATHB-14|ATHB14|PHB|PHB-1D	HB
AT5G63790	ANAC102|NAC102	NAC	MIR166g	AT2G34710	ATHB-14|ATHB14|PHB|PHB-1D	HB
AT5G24470	APRR5|PRR5	Pseudo ARR-B	MIR166g	AT2G34710	ATHB-14|ATHB14|PHB|PHB-1D	HB
AT1G80840	ATWRKY40|WRKY40	WRKY	MIR166g	AT2G34710	ATHB-14|ATHB14|PHB|PHB-1D	HB
AT2G38470	ATWRKY33|WRKY33	WRKY	MIR166g	AT2G34710	ATHB-14|ATHB14|PHB|PHB-1D	HB
AT4G31800	ATWRKY18|WRKY18	WRKY	MIR166g	AT2G34710	ATHB-14|ATHB14|PHB|PHB-1D	HB
AT4G37750	ANT|CKC|CKC1|DRG	AP2-EREBP	MIR396a	AT2G36400	AtGRF3|GRF3	GRF
AT5G17430	BBM	AP2-EREBP	MIR396a	AT2G36400	AtGRF3|GRF3	GRF
AT2G01760	ARR14|RR14	ARR-B	MIR396a	AT2G36400	AtGRF3|GRF3	GRF
AT2G25180	ARR12|RR12	ARR-B	MIR396a	AT2G36400	AtGRF3|GRF3	GRF
AT3G16857	ARR1|RR1	ARR-B	MIR396a	AT2G36400	AtGRF3|GRF3	GRF
AT1G49720	ABF1|AtABF1	bZIP	MIR396a	AT2G36400	AtGRF3|GRF3	GRF
AT2G41070	ATBZIP12|DPBF4|EEL	bZIP	MIR396a	AT2G36400	AtGRF3|GRF3	GRF
AT2G46270	GBF3	bZIP	MIR396a	AT2G36400	AtGRF3|GRF3	GRF
AT3G19290	ABF4|AREB2	bZIP	MIR396a	AT2G36400	AtGRF3|GRF3	GRF
AT4G01120	ATBZIP54|GBF2	bZIP	MIR396a	AT2G36400	AtGRF3|GRF3	GRF
AT4G34000	ABF3|AtABF3|DPBF5	bZIP	MIR396a	AT2G36400	AtGRF3|GRF3	GRF
AT5G04340	C2H2|CZF2|ZAT6	C2H2	MIR396a	AT2G36400	AtGRF3|GRF3	GRF
AT5G47640	NF-YB2	CCAAT	MIR396a	AT2G36400	AtGRF3|GRF3	GRF
AT3G20740	FIE|FIE1|FIS3		MIR396a	AT2G36400	AtGRF3|GRF3	GRF
AT2G46680	ATHB-7|ATHB7|HB-7	HB	MIR396a	AT2G36400	AtGRF3|GRF3	GRF
AT4G37790	HAT22	HB	MIR396a	AT2G36400	AtGRF3|GRF3	GRF
AT5G65310	ATHB-5|ATHB5|HB5	HB	MIR396a	AT2G36400	AtGRF3|GRF3	GRF
AT5G16820	ATHSF3|ATHSFA1B|HSF3|HSFA1B	HSF	MIR396a	AT2G36400	AtGRF3|GRF3	GRF
AT5G60910	AGL8|FUL	MADS	MIR396a	AT2G36400	AtGRF3|GRF3	GRF
AT1G22640	ATMYB3|MYB3	MYB	MIR396a	AT2G36400	AtGRF3|GRF3	GRF
AT5G67300	ATMYB44|ATMYBR1|MYB44|MYBR1	MYB	MIR396a	AT2G36400	AtGRF3|GRF3	GRF
AT1G49950	ATTRB1|TRB1	MYB-related	MIR396a	AT2G36400	AtGRF3|GRF3	GRF
AT4G15180	ATXR3|SDG2	SET	MIR396a	AT2G36400	AtGRF3|GRF3	GRF
AT5G04940	SUVH1	SET	MIR396a	AT2G36400	AtGRF3|GRF3	GRF
AT2G16390	CHR35|DMS1|DRD1	SNF2	MIR396a	AT2G36400	AtGRF3|GRF3	GRF
AT2G46020	ATBRM|BRM|CHA2|CHR2	SNF2	MIR396a	AT2G36400	AtGRF3|GRF3	GRF
AT2G38470	ATWRKY33|WRKY33	WRKY	MIR396a	AT2G36400	AtGRF3|GRF3	GRF
AT5G17430	BBM	AP2-EREBP	MIR396b	AT2G36400	AtGRF3|GRF3	GRF
AT2G33860	ARF3|ETT	ARF	MIR396b	AT2G36400	AtGRF3|GRF3	GRF
AT2G01760	ARR14|RR14	ARR-B	MIR396b	AT2G36400	AtGRF3|GRF3	GRF
AT2G25180	ARR12|RR12	ARR-B	MIR396b	AT2G36400	AtGRF3|GRF3	GRF
AT3G16857	ARR1|RR1	ARR-B	MIR396b	AT2G36400	AtGRF3|GRF3	GRF
AT4G31920	ARR10|RR10	ARR-B	MIR396b	AT2G36400	AtGRF3|GRF3	GRF
AT5G42520	ATBPC6|BBR/BPC6|BPC6	BBR-BPC	MIR396b	AT2G36400	AtGRF3|GRF3	GRF
AT1G51140	FBH3	bHLH	MIR396b	AT2G36400	AtGRF3|GRF3	GRF
AT2G43010	AtPIF4|PIF4|SRL2	bHLH	MIR396b	AT2G36400	AtGRF3|GRF3	GRF
AT5G53210	SPCH	bHLH	MIR396b	AT2G36400	AtGRF3|GRF3	GRF
AT5G67060	HEC1	bHLH	MIR396b	AT2G36400	AtGRF3|GRF3	GRF
AT1G49720	ABF1|AtABF1	bZIP	MIR396b	AT2G36400	AtGRF3|GRF3	GRF
AT2G41070	ATBZIP12|DPBF4|EEL	bZIP	MIR396b	AT2G36400	AtGRF3|GRF3	GRF
AT2G46270	GBF3	bZIP	MIR396b	AT2G36400	AtGRF3|GRF3	GRF
AT3G19290	ABF4|AREB2	bZIP	MIR396b	AT2G36400	AtGRF3|GRF3	GRF
AT4G01120	ATBZIP54|GBF2	bZIP	MIR396b	AT2G36400	AtGRF3|GRF3	GRF
AT4G34000	ABF3|AtABF3|DPBF5	bZIP	MIR396b	AT2G36400	AtGRF3|GRF3	GRF
AT5G56860	GATA21|GNC	C2C2-GATA	MIR396b	AT2G36400	AtGRF3|GRF3	GRF
AT3G48430	JMJ12|REF6	C2H2	MIR396b	AT2G36400	AtGRF3|GRF3	GRF
AT5G04340	C2H2|CZF2|ZAT6	C2H2	MIR396b	AT2G36400	AtGRF3|GRF3	GRF
AT1G56170	ATHAP5B|HAP5B|NF-YC2	CCAAT	MIR396b	AT2G36400	AtGRF3|GRF3	GRF
AT5G47640	NF-YB2	CCAAT	MIR396b	AT2G36400	AtGRF3|GRF3	GRF
AT2G01570	RGA|RGA1	GRAS	MIR396b	AT2G36400	AtGRF3|GRF3	GRF
AT2G46680	ATHB-7|ATHB7|HB-7	HB	MIR396b	AT2G36400	AtGRF3|GRF3	GRF
AT4G37790	HAT22	HB	MIR396b	AT2G36400	AtGRF3|GRF3	GRF
AT5G02030	BLH9|BLR|HB-6|LSN|PNY|RPL|VAN	HB	MIR396b	AT2G36400	AtGRF3|GRF3	GRF
AT5G60690	IFL|IFL1|REV	HB	MIR396b	AT2G36400	AtGRF3|GRF3	GRF
AT5G65310	ATHB-5|ATHB5|HB5	HB	MIR396b	AT2G36400	AtGRF3|GRF3	GRF
AT5G16820	ATHSF3|ATHSFA1B|HSF3|HSFA1B	HSF	MIR396b	AT2G36400	AtGRF3|GRF3	GRF
AT1G24260	AGL9|SEP3	MADS	MIR396b	AT2G36400	AtGRF3|GRF3	GRF
AT5G60910	AGL8|FUL	MADS	MIR396b	AT2G36400	AtGRF3|GRF3	GRF
AT1G22640	ATMYB3|MYB3	MYB	MIR396b	AT2G36400	AtGRF3|GRF3	GRF
AT5G04760		MYB	MIR396b	AT2G36400	AtGRF3|GRF3	GRF
AT5G67300	ATMYB44|ATMYBR1|MYB44|MYBR1	MYB	MIR396b	AT2G36400	AtGRF3|GRF3	GRF
AT1G77450	anac032|NAC032	NAC	MIR396b	AT2G36400	AtGRF3|GRF3	GRF
AT4G27410	ANAC072|RD26	NAC	MIR396b	AT2G36400	AtGRF3|GRF3	GRF
AT3G01460	ATMBD9|MBD9	PHD	MIR396b	AT2G36400	AtGRF3|GRF3	GRF
AT5G04940	SUVH1	SET	MIR396b	AT2G36400	AtGRF3|GRF3	GRF
AT2G16390	CHR35|DMS1|DRD1	SNF2	MIR396b	AT2G36400	AtGRF3|GRF3	GRF
AT2G46020	ATBRM|BRM|CHA2|CHR2	SNF2	MIR396b	AT2G36400	AtGRF3|GRF3	GRF
AT4G31270		Trihelix	MIR396b	AT2G36400	AtGRF3|GRF3	GRF
AT5G47640	NF-YB2	CCAAT	MIR5021	AT2G38130	ATMAK3	GNAT
AT5G18960	FRS12	FAR1	MIR5021	AT2G38130	ATMAK3	GNAT
AT1G77300	ASHH2|CCR1|EFS|LAZ2|SDG8	SET	MIR5021	AT2G38130	ATMAK3	GNAT
AT5G67450	AZF1|ZF1	C2H2	MIR169d	AT2G46020	ATBRM|BRM|CHA2|CHR2	SNF2
AT3G20740	FIE|FIE1|FIS3		MIR169d	AT2G46020	ATBRM|BRM|CHA2|CHR2	SNF2
AT4G27410	ANAC072|RD26	NAC	MIR169d	AT2G46020	ATBRM|BRM|CHA2|CHR2	SNF2
AT5G17430	BBM	AP2-EREBP	MIR169e	AT2G46020	ATBRM|BRM|CHA2|CHR2	SNF2
AT2G01760	ARR14|RR14	ARR-B	MIR169e	AT2G46020	ATBRM|BRM|CHA2|CHR2	SNF2
AT4G34000	ABF3|AtABF3|DPBF5	bZIP	MIR169e	AT2G46020	ATBRM|BRM|CHA2|CHR2	SNF2
AT5G04340	C2H2|CZF2|ZAT6	C2H2	MIR169e	AT2G46020	ATBRM|BRM|CHA2|CHR2	SNF2
AT5G67450	AZF1|ZF1	C2H2	MIR169e	AT2G46020	ATBRM|BRM|CHA2|CHR2	SNF2
AT3G20740	FIE|FIE1|FIS3		MIR169e	AT2G46020	ATBRM|BRM|CHA2|CHR2	SNF2
AT4G28610	AtPHR1|PHR1	G2-like	MIR169e	AT2G46020	ATBRM|BRM|CHA2|CHR2	SNF2
AT2G22430	ATHB6|HB6	HB	MIR169e	AT2G46020	ATBRM|BRM|CHA2|CHR2	SNF2
AT5G04760		MYB	MIR169e	AT2G46020	ATBRM|BRM|CHA2|CHR2	SNF2
AT5G67300	ATMYB44|ATMYBR1|MYB44|MYBR1	MYB	MIR169e	AT2G46020	ATBRM|BRM|CHA2|CHR2	SNF2
AT2G46830	AtCCA1|CCA1	MYB-related	MIR169e	AT2G46020	ATBRM|BRM|CHA2|CHR2	SNF2
AT2G28290	CHR3|SYD	SNF2	MIR169e	AT2G46020	ATBRM|BRM|CHA2|CHR2	SNF2
AT4G31800	ATWRKY18|WRKY18	WRKY	MIR169e	AT2G46020	ATBRM|BRM|CHA2|CHR2	SNF2
AT1G49720	ABF1|AtABF1	bZIP	MIR169f	AT2G46020	ATBRM|BRM|CHA2|CHR2	SNF2
AT3G19290	ABF4|AREB2	bZIP	MIR169f	AT2G46020	ATBRM|BRM|CHA2|CHR2	SNF2
AT4G01120	ATBZIP54|GBF2	bZIP	MIR169f	AT2G46020	ATBRM|BRM|CHA2|CHR2	SNF2
AT5G04340	C2H2|CZF2|ZAT6	C2H2	MIR169f	AT2G46020	ATBRM|BRM|CHA2|CHR2	SNF2
AT4G27410	ANAC072|RD26	NAC	MIR169f	AT2G46020	ATBRM|BRM|CHA2|CHR2	SNF2
AT2G38470	ATWRKY33|WRKY33	WRKY	MIR169f	AT2G46020	ATBRM|BRM|CHA2|CHR2	SNF2
AT4G31800	ATWRKY18|WRKY18	WRKY	MIR169f	AT2G46020	ATBRM|BRM|CHA2|CHR2	SNF2
AT1G32150	AtbZIP68|bZIP68	bZIP	MIR169g	AT2G46020	ATBRM|BRM|CHA2|CHR2	SNF2
AT1G49720	ABF1|AtABF1	bZIP	MIR169g	AT2G46020	ATBRM|BRM|CHA2|CHR2	SNF2
AT2G41070	ATBZIP12|DPBF4|EEL	bZIP	MIR169g	AT2G46020	ATBRM|BRM|CHA2|CHR2	SNF2
AT2G46270	GBF3	bZIP	MIR169g	AT2G46020	ATBRM|BRM|CHA2|CHR2	SNF2
AT3G19290	ABF4|AREB2	bZIP	MIR169g	AT2G46020	ATBRM|BRM|CHA2|CHR2	SNF2
AT4G01120	ATBZIP54|GBF2	bZIP	MIR169g	AT2G46020	ATBRM|BRM|CHA2|CHR2	SNF2
AT4G34000	ABF3|AtABF3|DPBF5	bZIP	MIR169g	AT2G46020	ATBRM|BRM|CHA2|CHR2	SNF2
AT5G04340	C2H2|CZF2|ZAT6	C2H2	MIR169g	AT2G46020	ATBRM|BRM|CHA2|CHR2	SNF2
AT4G28610	AtPHR1|PHR1	G2-like	MIR169g	AT2G46020	ATBRM|BRM|CHA2|CHR2	SNF2
AT4G27410	ANAC072|RD26	NAC	MIR169g	AT2G46020	ATBRM|BRM|CHA2|CHR2	SNF2
AT5G04340	C2H2|CZF2|ZAT6	C2H2	MIR5021	AT2G48100		C2H2
AT5G47640	NF-YB2	CCAAT	MIR5021	AT2G48100		C2H2
AT2G46680	ATHB-7|ATHB7|HB-7	HB	MIR5021	AT2G48100		C2H2
AT4G37790	HAT22	HB	MIR5021	AT2G48100		C2H2
AT5G65310	ATHB-5|ATHB5|HB5	HB	MIR5021	AT2G48100		C2H2
AT1G77300	ASHH2|CCR1|EFS|LAZ2|SDG8	SET	MIR5021	AT2G48100		C2H2
AT2G28290	CHR3|SYD	SNF2	MIR5021	AT2G48100		C2H2
AT5G04340	C2H2|CZF2|ZAT6	C2H2	MIR5021	AT3G04850		CPP
AT5G47640	NF-YB2	CCAAT	MIR5021	AT3G04850		CPP
AT2G28290	CHR3|SYD	SNF2	MIR5021	AT3G04850		CPP
AT2G01760	ARR14|RR14	ARR-B	MIR866	AT3G05380	ALY2|ATALY2	MYB-related
AT3G16857	ARR1|RR1	ARR-B	MIR866	AT3G05380	ALY2|ATALY2	MYB-related
AT4G31920	ARR10|RR10	ARR-B	MIR866	AT3G05380	ALY2|ATALY2	MYB-related
AT5G53210	SPCH	bHLH	MIR866	AT3G05380	ALY2|ATALY2	MYB-related
AT1G32150	AtbZIP68|bZIP68	bZIP	MIR866	AT3G05380	ALY2|ATALY2	MYB-related
AT1G49720	ABF1|AtABF1	bZIP	MIR866	AT3G05380	ALY2|ATALY2	MYB-related
AT2G36270	ABI5|AtABI5|GIA1	bZIP	MIR866	AT3G05380	ALY2|ATALY2	MYB-related
AT2G41070	ATBZIP12|DPBF4|EEL	bZIP	MIR866	AT3G05380	ALY2|ATALY2	MYB-related
AT2G46270	GBF3	bZIP	MIR866	AT3G05380	ALY2|ATALY2	MYB-related
AT3G19290	ABF4|AREB2	bZIP	MIR866	AT3G05380	ALY2|ATALY2	MYB-related
AT4G01120	ATBZIP54|GBF2	bZIP	MIR866	AT3G05380	ALY2|ATALY2	MYB-related
AT4G34000	ABF3|AtABF3|DPBF5	bZIP	MIR866	AT3G05380	ALY2|ATALY2	MYB-related
AT4G35900	atbzip14|FD|FD-1	bZIP	MIR866	AT3G05380	ALY2|ATALY2	MYB-related
AT5G11260	HY5|TED	bZIP	MIR866	AT3G05380	ALY2|ATALY2	MYB-related
AT5G04340	C2H2|CZF2|ZAT6	C2H2	MIR866	AT3G05380	ALY2|ATALY2	MYB-related
AT1G21970	AtLEC1|EMB|EMB212|LEC1|NF-YB9	CCAAT	MIR866	AT3G05380	ALY2|ATALY2	MYB-related
AT1G56170	ATHAP5B|HAP5B|NF-YC2	CCAAT	MIR866	AT3G05380	ALY2|ATALY2	MYB-related
AT5G47640	NF-YB2	CCAAT	MIR866	AT3G05380	ALY2|ATALY2	MYB-related
AT2G22430	ATHB6|HB6	HB	MIR866	AT3G05380	ALY2|ATALY2	MYB-related
AT2G46680	ATHB-7|ATHB7|HB-7	HB	MIR866	AT3G05380	ALY2|ATALY2	MYB-related
AT4G37790	HAT22	HB	MIR866	AT3G05380	ALY2|ATALY2	MYB-related
AT5G65310	ATHB-5|ATHB5|HB5	HB	MIR866	AT3G05380	ALY2|ATALY2	MYB-related
AT5G04760		MYB	MIR866	AT3G05380	ALY2|ATALY2	MYB-related
AT5G67300	ATMYB44|ATMYBR1|MYB44|MYBR1	MYB	MIR866	AT3G05380	ALY2|ATALY2	MYB-related
AT1G77450	anac032|NAC032	NAC	MIR866	AT3G05380	ALY2|ATALY2	MYB-related
AT4G27410	ANAC072|RD26	NAC	MIR866	AT3G05380	ALY2|ATALY2	MYB-related
AT5G63790	ANAC102|NAC102	NAC	MIR866	AT3G05380	ALY2|ATALY2	MYB-related
AT3G11100		Trihelix	MIR866	AT3G05380	ALY2|ATALY2	MYB-related
AT3G16857	ARR1|RR1	ARR-B	MIR414	AT3G11200	AL2	Alfin-like
AT2G43010	AtPIF4|PIF4|SRL2	bHLH	MIR414	AT3G11200	AL2	Alfin-like
AT4G34000	ABF3|AtABF3|DPBF5	bZIP	MIR414	AT3G11200	AL2	Alfin-like
AT5G47640	NF-YB2	CCAAT	MIR414	AT3G11200	AL2	Alfin-like
AT2G36010	ATE2FA|E2F3	E2F-DP	MIR414	AT3G11200	AL2	Alfin-like
AT2G22430	ATHB6|HB6	HB	MIR414	AT3G11200	AL2	Alfin-like
AT2G46680	ATHB-7|ATHB7|HB-7	HB	MIR414	AT3G11200	AL2	Alfin-like
AT5G16820	ATHSF3|ATHSFA1B|HSF3|HSFA1B	HSF	MIR414	AT3G11200	AL2	Alfin-like
AT1G22640	ATMYB3|MYB3	MYB	MIR414	AT3G11200	AL2	Alfin-like
AT5G04760		MYB	MIR414	AT3G11200	AL2	Alfin-like
AT1G77450	anac032|NAC032	NAC	MIR414	AT3G11200	AL2	Alfin-like
AT4G27410	ANAC072|RD26	NAC	MIR414	AT3G11200	AL2	Alfin-like
AT5G63790	ANAC102|NAC102	NAC	MIR414	AT3G11200	AL2	Alfin-like
AT1G80840	ATWRKY40|WRKY40	WRKY	MIR414	AT3G11200	AL2	Alfin-like
AT2G38470	ATWRKY33|WRKY33	WRKY	MIR414	AT3G11200	AL2	Alfin-like
AT4G31800	ATWRKY18|WRKY18	WRKY	MIR414	AT3G11200	AL2	Alfin-like
AT5G47640	NF-YB2	CCAAT	MIR414	AT3G12270	ATPRMT3|PRMT3	C2H2
AT2G36010	ATE2FA|E2F3	E2F-DP	MIR414	AT3G12270	ATPRMT3|PRMT3	C2H2
AT5G04340	C2H2|CZF2|ZAT6	C2H2	MIR5021	AT3G23150	ETR2	Orphans
AT5G47640	NF-YB2	CCAAT	MIR5021	AT3G23150	ETR2	Orphans
AT5G18960	FRS12	FAR1	MIR5021	AT3G23150	ETR2	Orphans
AT2G46680	ATHB-7|ATHB7|HB-7	HB	MIR5021	AT3G23150	ETR2	Orphans
AT4G37790	HAT22	HB	MIR5021	AT3G23150	ETR2	Orphans
AT5G65310	ATHB-5|ATHB5|HB5	HB	MIR5021	AT3G23150	ETR2	Orphans
AT1G77300	ASHH2|CCR1|EFS|LAZ2|SDG8	SET	MIR5021	AT3G23150	ETR2	Orphans
AT2G28290	CHR3|SYD	SNF2	MIR5021	AT3G23150	ETR2	Orphans
AT2G01760	ARR14|RR14	ARR-B	MIR414	AT3G42790	AL3	Alfin-like
AT3G16857	ARR1|RR1	ARR-B	MIR414	AT3G42790	AL3	Alfin-like
AT4G31920	ARR10|RR10	ARR-B	MIR414	AT3G42790	AL3	Alfin-like
AT5G56860	GATA21|GNC	C2C2-GATA	MIR414	AT3G42790	AL3	Alfin-like
AT5G47640	NF-YB2	CCAAT	MIR414	AT3G42790	AL3	Alfin-like
AT2G46680	ATHB-7|ATHB7|HB-7	HB	MIR414	AT3G42790	AL3	Alfin-like
AT5G61850	LFY|LFY3	LFY	MIR414	AT3G42790	AL3	Alfin-like
AT5G04760		MYB	MIR414	AT3G42790	AL3	Alfin-like
AT1G80840	ATWRKY40|WRKY40	WRKY	MIR414	AT3G42790	AL3	Alfin-like
AT2G38470	ATWRKY33|WRKY33	WRKY	MIR414	AT3G42790	AL3	Alfin-like
AT4G31800	ATWRKY18|WRKY18	WRKY	MIR414	AT3G42790	AL3	Alfin-like
AT2G01760	ARR14|RR14	ARR-B	MIR414	AT3G51880	AtHMGB1|HMGB1|NFD1	HMG
AT2G25180	ARR12|RR12	ARR-B	MIR414	AT3G51880	AtHMGB1|HMGB1|NFD1	HMG
AT3G16857	ARR1|RR1	ARR-B	MIR414	AT3G51880	AtHMGB1|HMGB1|NFD1	HMG
AT4G31920	ARR10|RR10	ARR-B	MIR414	AT3G51880	AtHMGB1|HMGB1|NFD1	HMG
AT1G32640	ATMYC2|JAI1|JIN1|MYC2|RD22BP1|ZBF1	bHLH	MIR414	AT3G51880	AtHMGB1|HMGB1|NFD1	HMG
AT2G43010	AtPIF4|PIF4|SRL2	bHLH	MIR414	AT3G51880	AtHMGB1|HMGB1|NFD1	HMG
AT5G46760	MYC3	bHLH	MIR414	AT3G51880	AtHMGB1|HMGB1|NFD1	HMG
AT4G34000	ABF3|AtABF3|DPBF5	bZIP	MIR414	AT3G51880	AtHMGB1|HMGB1|NFD1	HMG
AT5G56860	GATA21|GNC	C2C2-GATA	MIR414	AT3G51880	AtHMGB1|HMGB1|NFD1	HMG
AT2G02080	AtIDD4|IDD4	C2H2	MIR414	AT3G51880	AtHMGB1|HMGB1|NFD1	HMG
AT5G04340	C2H2|CZF2|ZAT6	C2H2	MIR414	AT3G51880	AtHMGB1|HMGB1|NFD1	HMG
AT5G47640	NF-YB2	CCAAT	MIR414	AT3G51880	AtHMGB1|HMGB1|NFD1	HMG
AT2G36010	ATE2FA|E2F3	E2F-DP	MIR414	AT3G51880	AtHMGB1|HMGB1|NFD1	HMG
AT2G01570	RGA|RGA1	GRAS	MIR414	AT3G51880	AtHMGB1|HMGB1|NFD1	HMG
AT2G22430	ATHB6|HB6	HB	MIR414	AT3G51880	AtHMGB1|HMGB1|NFD1	HMG
AT2G46680	ATHB-7|ATHB7|HB-7	HB	MIR414	AT3G51880	AtHMGB1|HMGB1|NFD1	HMG
AT4G37790	HAT22	HB	MIR414	AT3G51880	AtHMGB1|HMGB1|NFD1	HMG
AT5G65310	ATHB-5|ATHB5|HB5	HB	MIR414	AT3G51880	AtHMGB1|HMGB1|NFD1	HMG
AT5G16820	ATHSF3|ATHSFA1B|HSF3|HSFA1B	HSF	MIR414	AT3G51880	AtHMGB1|HMGB1|NFD1	HMG
AT1G22640	ATMYB3|MYB3	MYB	MIR414	AT3G51880	AtHMGB1|HMGB1|NFD1	HMG
AT5G04760		MYB	MIR414	AT3G51880	AtHMGB1|HMGB1|NFD1	HMG
AT5G67300	ATMYB44|ATMYBR1|MYB44|MYBR1	MYB	MIR414	AT3G51880	AtHMGB1|HMGB1|NFD1	HMG
AT4G27410	ANAC072|RD26	NAC	MIR414	AT3G51880	AtHMGB1|HMGB1|NFD1	HMG
AT4G31800	ATWRKY18|WRKY18	WRKY	MIR414	AT3G51880	AtHMGB1|HMGB1|NFD1	HMG
AT5G04340	C2H2|CZF2|ZAT6	C2H2	MIR5021	AT3G52250		MYB
AT5G47640	NF-YB2	CCAAT	MIR5021	AT3G52250		MYB
AT2G46680	ATHB-7|ATHB7|HB-7	HB	MIR5021	AT3G52250		MYB
AT1G77300	ASHH2|CCR1|EFS|LAZ2|SDG8	SET	MIR5021	AT3G52250		MYB
AT5G05410	DREB2|DREB2A	AP2-EREBP	MIR824	AT3G57230	AGL16	MADS
AT2G01760	ARR14|RR14	ARR-B	MIR824	AT3G57230	AGL16	MADS
AT3G16857	ARR1|RR1	ARR-B	MIR824	AT3G57230	AGL16	MADS
AT4G31920	ARR10|RR10	ARR-B	MIR824	AT3G57230	AGL16	MADS
AT1G32640	ATMYC2|JAI1|JIN1|MYC2|RD22BP1|ZBF1	bHLH	MIR824	AT3G57230	AGL16	MADS
AT1G51140	FBH3	bHLH	MIR824	AT3G57230	AGL16	MADS
AT5G46760	MYC3	bHLH	MIR824	AT3G57230	AGL16	MADS
AT5G53210	SPCH	bHLH	MIR824	AT3G57230	AGL16	MADS
AT1G49720	ABF1|AtABF1	bZIP	MIR824	AT3G57230	AGL16	MADS
AT2G36270	ABI5|AtABI5|GIA1	bZIP	MIR824	AT3G57230	AGL16	MADS
AT2G46270	GBF3	bZIP	MIR824	AT3G57230	AGL16	MADS
AT3G19290	ABF4|AREB2	bZIP	MIR824	AT3G57230	AGL16	MADS
AT4G01120	ATBZIP54|GBF2	bZIP	MIR824	AT3G57230	AGL16	MADS
AT4G34000	ABF3|AtABF3|DPBF5	bZIP	MIR824	AT3G57230	AGL16	MADS
AT4G35900	atbzip14|FD|FD-1	bZIP	MIR824	AT3G57230	AGL16	MADS
AT1G56170	ATHAP5B|HAP5B|NF-YC2	CCAAT	MIR824	AT3G57230	AGL16	MADS
AT5G47640	NF-YB2	CCAAT	MIR824	AT3G57230	AGL16	MADS
AT2G36010	ATE2FA|E2F3	E2F-DP	MIR824	AT3G57230	AGL16	MADS
AT5G16560	KAN|KAN1	G2-like	MIR824	AT3G57230	AGL16	MADS
AT5G16820	ATHSF3|ATHSFA1B|HSF3|HSFA1B	HSF	MIR824	AT3G57230	AGL16	MADS
AT1G24260	AGL9|SEP3	MADS	MIR824	AT3G57230	AGL16	MADS
AT1G69120	AGL7|AP1	MADS	MIR824	AT3G57230	AGL16	MADS
AT5G10140	AGL25|FLC|FLF|RSB6	MADS	MIR824	AT3G57230	AGL16	MADS
AT5G60910	AGL8|FUL	MADS	MIR824	AT3G57230	AGL16	MADS
AT1G22640	ATMYB3|MYB3	MYB	MIR824	AT3G57230	AGL16	MADS
AT5G04760		MYB	MIR824	AT3G57230	AGL16	MADS
AT5G67300	ATMYB44|ATMYBR1|MYB44|MYBR1	MYB	MIR824	AT3G57230	AGL16	MADS
AT1G01060	LHY|LHY1	MYB-related	MIR824	AT3G57230	AGL16	MADS
AT1G49950	ATTRB1|TRB1	MYB-related	MIR824	AT3G57230	AGL16	MADS
AT1G77450	anac032|NAC032	NAC	MIR824	AT3G57230	AGL16	MADS
AT5G63790	ANAC102|NAC102	NAC	MIR824	AT3G57230	AGL16	MADS
AT2G46020	ATBRM|BRM|CHA2|CHR2	SNF2	MIR824	AT3G57230	AGL16	MADS
AT3G10390	FLD	SWI/SNF-SWI3	MIR824	AT3G57230	AGL16	MADS
AT3G11100		Trihelix	MIR824	AT3G57230	AGL16	MADS
AT4G31800	ATWRKY18|WRKY18	WRKY	MIR824	AT3G57230	AGL16	MADS
AT5G67450	AZF1|ZF1	C2H2	MIR414	AT4G16310	LDL3	SWI/SNF-SWI3
AT5G47640	NF-YB2	CCAAT	MIR414	AT4G16310	LDL3	SWI/SNF-SWI3
AT5G18960	FRS12	FAR1	MIR414	AT4G16310	LDL3	SWI/SNF-SWI3
AT4G32010	HSI2-L1|HSL1|VAL2	ABI3-VP1	MIR5658	AT4G24240	ATWRKY7|WRKY7	WRKY
AT5G17430	BBM	AP2-EREBP	MIR5658	AT4G24240	ATWRKY7|WRKY7	WRKY
AT2G01760	ARR14|RR14	ARR-B	MIR5658	AT4G24240	ATWRKY7|WRKY7	WRKY
AT2G25180	ARR12|RR12	ARR-B	MIR5658	AT4G24240	ATWRKY7|WRKY7	WRKY
AT3G16857	ARR1|RR1	ARR-B	MIR5658	AT4G24240	ATWRKY7|WRKY7	WRKY
AT4G31920	ARR10|RR10	ARR-B	MIR5658	AT4G24240	ATWRKY7|WRKY7	WRKY
AT1G09530	PAP3|PIF3|POC1	bHLH	MIR5658	AT4G24240	ATWRKY7|WRKY7	WRKY
AT2G43010	AtPIF4|PIF4|SRL2	bHLH	MIR5658	AT4G24240	ATWRKY7|WRKY7	WRKY
AT5G53210	SPCH	bHLH	MIR5658	AT4G24240	ATWRKY7|WRKY7	WRKY
AT5G67060	HEC1	bHLH	MIR5658	AT4G24240	ATWRKY7|WRKY7	WRKY
AT1G32150	AtbZIP68|bZIP68	bZIP	MIR5658	AT4G24240	ATWRKY7|WRKY7	WRKY
AT1G49720	ABF1|AtABF1	bZIP	MIR5658	AT4G24240	ATWRKY7|WRKY7	WRKY
AT2G46270	GBF3	bZIP	MIR5658	AT4G24240	ATWRKY7|WRKY7	WRKY
AT3G19290	ABF4|AREB2	bZIP	MIR5658	AT4G24240	ATWRKY7|WRKY7	WRKY
AT4G01120	ATBZIP54|GBF2	bZIP	MIR5658	AT4G24240	ATWRKY7|WRKY7	WRKY
AT4G34000	ABF3|AtABF3|DPBF5	bZIP	MIR5658	AT4G24240	ATWRKY7|WRKY7	WRKY
AT5G11260	HY5|TED	bZIP	MIR5658	AT4G24240	ATWRKY7|WRKY7	WRKY
AT5G56860	GATA21|GNC	C2C2-GATA	MIR5658	AT4G24240	ATWRKY7|WRKY7	WRKY
AT3G48430	JMJ12|REF6	C2H2	MIR5658	AT4G24240	ATWRKY7|WRKY7	WRKY
AT4G35610		C2H2	MIR5658	AT4G24240	ATWRKY7|WRKY7	WRKY
AT5G04340	C2H2|CZF2|ZAT6	C2H2	MIR5658	AT4G24240	ATWRKY7|WRKY7	WRKY
AT5G47640	NF-YB2	CCAAT	MIR5658	AT4G24240	ATWRKY7|WRKY7	WRKY
AT5G18960	FRS12	FAR1	MIR5658	AT4G24240	ATWRKY7|WRKY7	WRKY
AT2G17950	PGA6|WUS|WUS1	HB	MIR5658	AT4G24240	ATWRKY7|WRKY7	WRKY
AT2G22430	ATHB6|HB6	HB	MIR5658	AT4G24240	ATWRKY7|WRKY7	WRKY
AT2G46680	ATHB-7|ATHB7|HB-7	HB	MIR5658	AT4G24240	ATWRKY7|WRKY7	WRKY
AT4G37790	HAT22	HB	MIR5658	AT4G24240	ATWRKY7|WRKY7	WRKY
AT5G02030	BLH9|BLR|HB-6|LSN|PNY|RPL|VAN	HB	MIR5658	AT4G24240	ATWRKY7|WRKY7	WRKY
AT5G65310	ATHB-5|ATHB5|HB5	HB	MIR5658	AT4G24240	ATWRKY7|WRKY7	WRKY
AT5G16820	ATHSF3|ATHSFA1B|HSF3|HSFA1B	HSF	MIR5658	AT4G24240	ATWRKY7|WRKY7	WRKY
AT5G61850	LFY|LFY3	LFY	MIR5658	AT4G24240	ATWRKY7|WRKY7	WRKY
AT1G24260	AGL9|SEP3	MADS	MIR5658	AT4G24240	ATWRKY7|WRKY7	WRKY
AT5G60910	AGL8|FUL	MADS	MIR5658	AT4G24240	ATWRKY7|WRKY7	WRKY
AT1G22640	ATMYB3|MYB3	MYB	MIR5658	AT4G24240	ATWRKY7|WRKY7	WRKY
AT5G04760		MYB	MIR5658	AT4G24240	ATWRKY7|WRKY7	WRKY
AT5G67300	ATMYB44|ATMYBR1|MYB44|MYBR1	MYB	MIR5658	AT4G24240	ATWRKY7|WRKY7	WRKY
AT1G77450	anac032|NAC032	NAC	MIR5658	AT4G24240	ATWRKY7|WRKY7	WRKY
AT4G27410	ANAC072|RD26	NAC	MIR5658	AT4G24240	ATWRKY7|WRKY7	WRKY
AT5G63790	ANAC102|NAC102	NAC	MIR5658	AT4G24240	ATWRKY7|WRKY7	WRKY
AT5G24470	APRR5|PRR5	Pseudo ARR-B	MIR5658	AT4G24240	ATWRKY7|WRKY7	WRKY
AT4G24020	NLP7	RWP-RK	MIR5658	AT4G24240	ATWRKY7|WRKY7	WRKY
AT1G77300	ASHH2|CCR1|EFS|LAZ2|SDG8	SET	MIR5658	AT4G24240	ATWRKY7|WRKY7	WRKY
AT2G16390	CHR35|DMS1|DRD1	SNF2	MIR5658	AT4G24240	ATWRKY7|WRKY7	WRKY
AT2G28290	CHR3|SYD	SNF2	MIR5658	AT4G24240	ATWRKY7|WRKY7	WRKY
AT2G46020	ATBRM|BRM|CHA2|CHR2	SNF2	MIR5658	AT4G24240	ATWRKY7|WRKY7	WRKY
AT3G15030	MEE35|TCP4	TCP	MIR5658	AT4G24240	ATWRKY7|WRKY7	WRKY
AT4G14720	PPD2|TIFY4B	Tify	MIR5658	AT4G24240	ATWRKY7|WRKY7	WRKY
AT1G80840	ATWRKY40|WRKY40	WRKY	MIR5658	AT4G24240	ATWRKY7|WRKY7	WRKY
AT2G38470	ATWRKY33|WRKY33	WRKY	MIR5658	AT4G24240	ATWRKY7|WRKY7	WRKY
AT4G31800	ATWRKY18|WRKY18	WRKY	MIR5658	AT4G24240	ATWRKY7|WRKY7	WRKY
AT3G16857	ARR1|RR1	ARR-B	MIR864	AT4G25210		GeBP
AT1G09530	PAP3|PIF3|POC1	bHLH	MIR864	AT4G25210		GeBP
AT2G43010	AtPIF4|PIF4|SRL2	bHLH	MIR864	AT4G25210		GeBP
AT1G49720	ABF1|AtABF1	bZIP	MIR864	AT4G25210		GeBP
AT3G19290	ABF4|AREB2	bZIP	MIR864	AT4G25210		GeBP
AT4G01120	ATBZIP54|GBF2	bZIP	MIR864	AT4G25210		GeBP
AT4G34000	ABF3|AtABF3|DPBF5	bZIP	MIR864	AT4G25210		GeBP
AT5G47640	NF-YB2	CCAAT	MIR864	AT4G25210		GeBP
AT2G22430	ATHB6|HB6	HB	MIR864	AT4G25210		GeBP
AT5G04760		MYB	MIR864	AT4G25210		GeBP
AT1G49950	ATTRB1|TRB1	MYB-related	MIR864	AT4G25210		GeBP
AT4G27410	ANAC072|RD26	NAC	MIR864	AT4G25210		GeBP
AT2G28290	CHR3|SYD	SNF2	MIR864	AT4G25210		GeBP
AT1G80840	ATWRKY40|WRKY40	WRKY	MIR864	AT4G25210		GeBP
AT2G38470	ATWRKY33|WRKY33	WRKY	MIR864	AT4G25210		GeBP
AT4G31800	ATWRKY18|WRKY18	WRKY	MIR864	AT4G25210		GeBP
AT5G04340	C2H2|CZF2|ZAT6	C2H2	MIR5021	AT4G31550	ATWRKY11|WRKY11	WRKY
AT5G47640	NF-YB2	CCAAT	MIR5021	AT4G31550	ATWRKY11|WRKY11	WRKY
AT5G18960	FRS12	FAR1	MIR5021	AT4G31550	ATWRKY11|WRKY11	WRKY
AT2G46680	ATHB-7|ATHB7|HB-7	HB	MIR5021	AT4G31550	ATWRKY11|WRKY11	WRKY
AT4G37790	HAT22	HB	MIR5021	AT4G31550	ATWRKY11|WRKY11	WRKY
AT5G65310	ATHB-5|ATHB5|HB5	HB	MIR5021	AT4G31550	ATWRKY11|WRKY11	WRKY
AT2G28290	CHR3|SYD	SNF2	MIR5021	AT4G31550	ATWRKY11|WRKY11	WRKY
AT5G04340	C2H2|CZF2|ZAT6	C2H2	MIR5021	AT5G03150	JKD	C2H2
AT5G47640	NF-YB2	CCAAT	MIR5021	AT5G03150	JKD	C2H2
AT4G37790	HAT22	HB	MIR5021	AT5G03150	JKD	C2H2
AT5G65310	ATHB-5|ATHB5|HB5	HB	MIR5021	AT5G03150	JKD	C2H2
AT2G28290	CHR3|SYD	SNF2	MIR5021	AT5G03150	JKD	C2H2
AT2G01760	ARR14|RR14	ARR-B	MIR414	AT5G05550		Trihelix
AT3G16857	ARR1|RR1	ARR-B	MIR414	AT5G05550		Trihelix
AT5G04340	C2H2|CZF2|ZAT6	C2H2	MIR414	AT5G05550		Trihelix
AT5G47640	NF-YB2	CCAAT	MIR414	AT5G05550		Trihelix
AT2G22430	ATHB6|HB6	HB	MIR414	AT5G05550		Trihelix
AT2G46680	ATHB-7|ATHB7|HB-7	HB	MIR414	AT5G05550		Trihelix
AT5G16820	ATHSF3|ATHSFA1B|HSF3|HSFA1B	HSF	MIR414	AT5G05550		Trihelix
AT1G24260	AGL9|SEP3	MADS	MIR414	AT5G05550		Trihelix
AT5G04760		MYB	MIR414	AT5G05550		Trihelix
AT5G67300	ATMYB44|ATMYBR1|MYB44|MYBR1	MYB	MIR414	AT5G05550		Trihelix
AT4G31800	ATWRKY18|WRKY18	WRKY	MIR414	AT5G05550		Trihelix
AT3G16857	ARR1|RR1	ARR-B	MIR159a	AT5G06100	ATMYB33|MYB33	MYB
AT5G42520	ATBPC6|BBR/BPC6|BPC6	BBR-BPC	MIR159a	AT5G06100	ATMYB33|MYB33	MYB
AT5G53210	SPCH	bHLH	MIR159a	AT5G06100	ATMYB33|MYB33	MYB
AT2G41070	ATBZIP12|DPBF4|EEL	bZIP	MIR159a	AT5G06100	ATMYB33|MYB33	MYB
AT2G46270	GBF3	bZIP	MIR159a	AT5G06100	ATMYB33|MYB33	MYB
AT3G19290	ABF4|AREB2	bZIP	MIR159a	AT5G06100	ATMYB33|MYB33	MYB
AT4G01120	ATBZIP54|GBF2	bZIP	MIR159a	AT5G06100	ATMYB33|MYB33	MYB
AT4G34000	ABF3|AtABF3|DPBF5	bZIP	MIR159a	AT5G06100	ATMYB33|MYB33	MYB
AT5G11260	HY5|TED	bZIP	MIR159a	AT5G06100	ATMYB33|MYB33	MYB
AT5G56860	GATA21|GNC	C2C2-GATA	MIR159a	AT5G06100	ATMYB33|MYB33	MYB
AT5G04340	C2H2|CZF2|ZAT6	C2H2	MIR159a	AT5G06100	ATMYB33|MYB33	MYB
AT1G21970	AtLEC1|EMB|EMB212|LEC1|NF-YB9	CCAAT	MIR159a	AT5G06100	ATMYB33|MYB33	MYB
AT5G47640	NF-YB2	CCAAT	MIR159a	AT5G06100	ATMYB33|MYB33	MYB
AT2G17950	PGA6|WUS|WUS1	HB	MIR159a	AT5G06100	ATMYB33|MYB33	MYB
AT2G22430	ATHB6|HB6	HB	MIR159a	AT5G06100	ATMYB33|MYB33	MYB
AT2G46680	ATHB-7|ATHB7|HB-7	HB	MIR159a	AT5G06100	ATMYB33|MYB33	MYB
AT5G02030	BLH9|BLR|HB-6|LSN|PNY|RPL|VAN	HB	MIR159a	AT5G06100	ATMYB33|MYB33	MYB
AT5G65310	ATHB-5|ATHB5|HB5	HB	MIR159a	AT5G06100	ATMYB33|MYB33	MYB
AT5G60910	AGL8|FUL	MADS	MIR159a	AT5G06100	ATMYB33|MYB33	MYB
AT1G22640	ATMYB3|MYB3	MYB	MIR159a	AT5G06100	ATMYB33|MYB33	MYB
AT5G04760		MYB	MIR159a	AT5G06100	ATMYB33|MYB33	MYB
AT5G67300	ATMYB44|ATMYBR1|MYB44|MYBR1	MYB	MIR159a	AT5G06100	ATMYB33|MYB33	MYB
AT1G77450	anac032|NAC032	NAC	MIR159a	AT5G06100	ATMYB33|MYB33	MYB
AT4G27410	ANAC072|RD26	NAC	MIR159a	AT5G06100	ATMYB33|MYB33	MYB
AT5G63790	ANAC102|NAC102	NAC	MIR159a	AT5G06100	ATMYB33|MYB33	MYB
AT2G46020	ATBRM|BRM|CHA2|CHR2	SNF2	MIR159a	AT5G06100	ATMYB33|MYB33	MYB
AT3G10390	FLD	SWI/SNF-SWI3	MIR159a	AT5G06100	ATMYB33|MYB33	MYB
AT2G38470	ATWRKY33|WRKY33	WRKY	MIR159a	AT5G06100	ATMYB33|MYB33	MYB
AT4G31800	ATWRKY18|WRKY18	WRKY	MIR159a	AT5G06100	ATMYB33|MYB33	MYB
AT5G39760	AtHB23|HB23|ZHD10	zf-HD	MIR159a	AT5G06100	ATMYB33|MYB33	MYB
AT2G46270	GBF3	bZIP	MIR159c	AT5G06100	ATMYB33|MYB33	MYB
AT3G16857	ARR1|RR1	ARR-B	MIR319a	AT5G06100	ATMYB33|MYB33	MYB
AT4G34000	ABF3|AtABF3|DPBF5	bZIP	MIR319a	AT5G06100	ATMYB33|MYB33	MYB
AT5G47640	NF-YB2	CCAAT	MIR319a	AT5G06100	ATMYB33|MYB33	MYB
AT2G22430	ATHB6|HB6	HB	MIR319a	AT5G06100	ATMYB33|MYB33	MYB
AT2G46680	ATHB-7|ATHB7|HB-7	HB	MIR319a	AT5G06100	ATMYB33|MYB33	MYB
AT5G02030	BLH9|BLR|HB-6|LSN|PNY|RPL|VAN	HB	MIR319a	AT5G06100	ATMYB33|MYB33	MYB
AT5G65310	ATHB-5|ATHB5|HB5	HB	MIR319a	AT5G06100	ATMYB33|MYB33	MYB
AT5G60910	AGL8|FUL	MADS	MIR319a	AT5G06100	ATMYB33|MYB33	MYB
AT5G67300	ATMYB44|ATMYBR1|MYB44|MYBR1	MYB	MIR319a	AT5G06100	ATMYB33|MYB33	MYB
AT3G16857	ARR1|RR1	ARR-B	MIR319b	AT5G06100	ATMYB33|MYB33	MYB
AT2G46270	GBF3	bZIP	MIR319b	AT5G06100	ATMYB33|MYB33	MYB
AT3G19290	ABF4|AREB2	bZIP	MIR319b	AT5G06100	ATMYB33|MYB33	MYB
AT4G01120	ATBZIP54|GBF2	bZIP	MIR319b	AT5G06100	ATMYB33|MYB33	MYB
AT5G56860	GATA21|GNC	C2C2-GATA	MIR319b	AT5G06100	ATMYB33|MYB33	MYB
AT1G21970	AtLEC1|EMB|EMB212|LEC1|NF-YB9	CCAAT	MIR319b	AT5G06100	ATMYB33|MYB33	MYB
AT5G02030	BLH9|BLR|HB-6|LSN|PNY|RPL|VAN	HB	MIR319b	AT5G06100	ATMYB33|MYB33	MYB
AT5G60910	AGL8|FUL	MADS	MIR319b	AT5G06100	ATMYB33|MYB33	MYB
AT2G46270	GBF3	bZIP	MIR319c	AT5G06100	ATMYB33|MYB33	MYB
AT4G01120	ATBZIP54|GBF2	bZIP	MIR319c	AT5G06100	ATMYB33|MYB33	MYB
AT4G34000	ABF3|AtABF3|DPBF5	bZIP	MIR319c	AT5G06100	ATMYB33|MYB33	MYB
AT5G56860	GATA21|GNC	C2C2-GATA	MIR319c	AT5G06100	ATMYB33|MYB33	MYB
AT5G04340	C2H2|CZF2|ZAT6	C2H2	MIR319c	AT5G06100	ATMYB33|MYB33	MYB
AT5G47640	NF-YB2	CCAAT	MIR319c	AT5G06100	ATMYB33|MYB33	MYB
AT5G18960	FRS12	FAR1	MIR319c	AT5G06100	ATMYB33|MYB33	MYB
AT2G22430	ATHB6|HB6	HB	MIR319c	AT5G06100	ATMYB33|MYB33	MYB
AT2G46680	ATHB-7|ATHB7|HB-7	HB	MIR319c	AT5G06100	ATMYB33|MYB33	MYB
AT5G65310	ATHB-5|ATHB5|HB5	HB	MIR319c	AT5G06100	ATMYB33|MYB33	MYB
AT5G60910	AGL8|FUL	MADS	MIR319c	AT5G06100	ATMYB33|MYB33	MYB
AT1G22640	ATMYB3|MYB3	MYB	MIR319c	AT5G06100	ATMYB33|MYB33	MYB
AT5G04760		MYB	MIR319c	AT5G06100	ATMYB33|MYB33	MYB
AT5G04340	C2H2|CZF2|ZAT6	C2H2	MIR5021	AT5G10510	AIL6|PLT3	AP2-EREBP
AT5G47640	NF-YB2	CCAAT	MIR5021	AT5G10510	AIL6|PLT3	AP2-EREBP
AT5G18960	FRS12	FAR1	MIR5021	AT5G10510	AIL6|PLT3	AP2-EREBP
AT2G46680	ATHB-7|ATHB7|HB-7	HB	MIR5021	AT5G10510	AIL6|PLT3	AP2-EREBP
AT4G37790	HAT22	HB	MIR5021	AT5G10510	AIL6|PLT3	AP2-EREBP
AT5G65310	ATHB-5|ATHB5|HB5	HB	MIR5021	AT5G10510	AIL6|PLT3	AP2-EREBP
AT2G28290	CHR3|SYD	SNF2	MIR5021	AT5G10510	AIL6|PLT3	AP2-EREBP
AT5G04340	C2H2|CZF2|ZAT6	C2H2	MIR5021	AT5G10720	AHK5|CKI2|HK5	Orphans
AT5G47640	NF-YB2	CCAAT	MIR5021	AT5G10720	AHK5|CKI2|HK5	Orphans
AT5G18960	FRS12	FAR1	MIR5021	AT5G10720	AHK5|CKI2|HK5	Orphans
AT2G46680	ATHB-7|ATHB7|HB-7	HB	MIR5021	AT5G10720	AHK5|CKI2|HK5	Orphans
AT4G37790	HAT22	HB	MIR5021	AT5G10720	AHK5|CKI2|HK5	Orphans
AT5G65310	ATHB-5|ATHB5|HB5	HB	MIR5021	AT5G10720	AHK5|CKI2|HK5	Orphans
AT2G28290	CHR3|SYD	SNF2	MIR5021	AT5G10720	AHK5|CKI2|HK5	Orphans
AT2G01760	ARR14|RR14	ARR-B	MIR857	AT5G10720	AHK5|CKI2|HK5	Orphans
AT2G36010	ATE2FA|E2F3	E2F-DP	MIR857	AT5G10720	AHK5|CKI2|HK5	Orphans
AT3G11100		Trihelix	MIR857	AT5G10720	AHK5|CKI2|HK5	Orphans
AT4G31800	ATWRKY18|WRKY18	WRKY	MIR857	AT5G10720	AHK5|CKI2|HK5	Orphans
AT5G17430	BBM	AP2-EREBP	MIR167a	AT5G37020	ARF8|ATARF8	ARF
AT2G01760	ARR14|RR14	ARR-B	MIR167a	AT5G37020	ARF8|ATARF8	ARF
AT3G16857	ARR1|RR1	ARR-B	MIR167a	AT5G37020	ARF8|ATARF8	ARF
AT4G31920	ARR10|RR10	ARR-B	MIR167a	AT5G37020	ARF8|ATARF8	ARF
AT5G42520	ATBPC6|BBR/BPC6|BPC6	BBR-BPC	MIR167a	AT5G37020	ARF8|ATARF8	ARF
AT2G43010	AtPIF4|PIF4|SRL2	bHLH	MIR167a	AT5G37020	ARF8|ATARF8	ARF
AT5G53210	SPCH	bHLH	MIR167a	AT5G37020	ARF8|ATARF8	ARF
AT5G67060	HEC1	bHLH	MIR167a	AT5G37020	ARF8|ATARF8	ARF
AT1G49720	ABF1|AtABF1	bZIP	MIR167a	AT5G37020	ARF8|ATARF8	ARF
AT2G46270	GBF3	bZIP	MIR167a	AT5G37020	ARF8|ATARF8	ARF
AT3G19290	ABF4|AREB2	bZIP	MIR167a	AT5G37020	ARF8|ATARF8	ARF
AT4G01120	ATBZIP54|GBF2	bZIP	MIR167a	AT5G37020	ARF8|ATARF8	ARF
AT4G34000	ABF3|AtABF3|DPBF5	bZIP	MIR167a	AT5G37020	ARF8|ATARF8	ARF
AT5G11260	HY5|TED	bZIP	MIR167a	AT5G37020	ARF8|ATARF8	ARF
AT5G56860	GATA21|GNC	C2C2-GATA	MIR167a	AT5G37020	ARF8|ATARF8	ARF
AT5G04340	C2H2|CZF2|ZAT6	C2H2	MIR167a	AT5G37020	ARF8|ATARF8	ARF
AT1G21970	AtLEC1|EMB|EMB212|LEC1|NF-YB9	CCAAT	MIR167a	AT5G37020	ARF8|ATARF8	ARF
AT1G56170	ATHAP5B|HAP5B|NF-YC2	CCAAT	MIR167a	AT5G37020	ARF8|ATARF8	ARF
AT5G47640	NF-YB2	CCAAT	MIR167a	AT5G37020	ARF8|ATARF8	ARF
AT2G01570	RGA|RGA1	GRAS	MIR167a	AT5G37020	ARF8|ATARF8	ARF
AT2G17950	PGA6|WUS|WUS1	HB	MIR167a	AT5G37020	ARF8|ATARF8	ARF
AT2G22430	ATHB6|HB6	HB	MIR167a	AT5G37020	ARF8|ATARF8	ARF
AT2G46680	ATHB-7|ATHB7|HB-7	HB	MIR167a	AT5G37020	ARF8|ATARF8	ARF
AT4G37790	HAT22	HB	MIR167a	AT5G37020	ARF8|ATARF8	ARF
AT5G02030	BLH9|BLR|HB-6|LSN|PNY|RPL|VAN	HB	MIR167a	AT5G37020	ARF8|ATARF8	ARF
AT5G60690	IFL|IFL1|REV	HB	MIR167a	AT5G37020	ARF8|ATARF8	ARF
AT5G65310	ATHB-5|ATHB5|HB5	HB	MIR167a	AT5G37020	ARF8|ATARF8	ARF
AT5G16820	ATHSF3|ATHSFA1B|HSF3|HSFA1B	HSF	MIR167a	AT5G37020	ARF8|ATARF8	ARF
AT5G61850	LFY|LFY3	LFY	MIR167a	AT5G37020	ARF8|ATARF8	ARF
AT1G24260	AGL9|SEP3	MADS	MIR167a	AT5G37020	ARF8|ATARF8	ARF
AT5G60910	AGL8|FUL	MADS	MIR167a	AT5G37020	ARF8|ATARF8	ARF
AT1G22640	ATMYB3|MYB3	MYB	MIR167a	AT5G37020	ARF8|ATARF8	ARF
AT5G04760		MYB	MIR167a	AT5G37020	ARF8|ATARF8	ARF
AT5G67300	ATMYB44|ATMYBR1|MYB44|MYBR1	MYB	MIR167a	AT5G37020	ARF8|ATARF8	ARF
AT1G01060	LHY|LHY1	MYB-related	MIR167a	AT5G37020	ARF8|ATARF8	ARF
AT1G49950	ATTRB1|TRB1	MYB-related	MIR167a	AT5G37020	ARF8|ATARF8	ARF
AT1G77450	anac032|NAC032	NAC	MIR167a	AT5G37020	ARF8|ATARF8	ARF
AT4G27410	ANAC072|RD26	NAC	MIR167a	AT5G37020	ARF8|ATARF8	ARF
AT3G01460	ATMBD9|MBD9	PHD	MIR167a	AT5G37020	ARF8|ATARF8	ARF
AT5G24470	APRR5|PRR5	Pseudo ARR-B	MIR167a	AT5G37020	ARF8|ATARF8	ARF
AT4G02020	EZA1|SDG10|SWN	SET	MIR167a	AT5G37020	ARF8|ATARF8	ARF
AT2G46020	ATBRM|BRM|CHA2|CHR2	SNF2	MIR167a	AT5G37020	ARF8|ATARF8	ARF
AT3G10390	FLD	SWI/SNF-SWI3	MIR167a	AT5G37020	ARF8|ATARF8	ARF
AT4G31270		Trihelix	MIR167a	AT5G37020	ARF8|ATARF8	ARF
AT1G80840	ATWRKY40|WRKY40	WRKY	MIR167a	AT5G37020	ARF8|ATARF8	ARF
AT2G38470	ATWRKY33|WRKY33	WRKY	MIR167a	AT5G37020	ARF8|ATARF8	ARF
AT4G31800	ATWRKY18|WRKY18	WRKY	MIR167a	AT5G37020	ARF8|ATARF8	ARF
AT3G48430	JMJ12|REF6	C2H2	MIR167b	AT5G37020	ARF8|ATARF8	ARF
AT5G17430	BBM	AP2-EREBP	MIR167c	AT5G37020	ARF8|ATARF8	ARF
AT2G25180	ARR12|RR12	ARR-B	MIR167c	AT5G37020	ARF8|ATARF8	ARF
AT3G16857	ARR1|RR1	ARR-B	MIR167c	AT5G37020	ARF8|ATARF8	ARF
AT5G53210	SPCH	bHLH	MIR167c	AT5G37020	ARF8|ATARF8	ARF
AT5G67060	HEC1	bHLH	MIR167c	AT5G37020	ARF8|ATARF8	ARF
AT1G49720	ABF1|AtABF1	bZIP	MIR167c	AT5G37020	ARF8|ATARF8	ARF
AT2G46270	GBF3	bZIP	MIR167c	AT5G37020	ARF8|ATARF8	ARF
AT3G19290	ABF4|AREB2	bZIP	MIR167c	AT5G37020	ARF8|ATARF8	ARF
AT4G01120	ATBZIP54|GBF2	bZIP	MIR167c	AT5G37020	ARF8|ATARF8	ARF
AT4G34000	ABF3|AtABF3|DPBF5	bZIP	MIR167c	AT5G37020	ARF8|ATARF8	ARF
AT5G47640	NF-YB2	CCAAT	MIR167c	AT5G37020	ARF8|ATARF8	ARF
AT2G22430	ATHB6|HB6	HB	MIR167c	AT5G37020	ARF8|ATARF8	ARF
AT2G46680	ATHB-7|ATHB7|HB-7	HB	MIR167c	AT5G37020	ARF8|ATARF8	ARF
AT5G04760		MYB	MIR167c	AT5G37020	ARF8|ATARF8	ARF
AT5G67300	ATMYB44|ATMYBR1|MYB44|MYBR1	MYB	MIR167c	AT5G37020	ARF8|ATARF8	ARF
AT1G77450	anac032|NAC032	NAC	MIR167c	AT5G37020	ARF8|ATARF8	ARF
AT4G27410	ANAC072|RD26	NAC	MIR167c	AT5G37020	ARF8|ATARF8	ARF
AT5G63790	ANAC102|NAC102	NAC	MIR167c	AT5G37020	ARF8|ATARF8	ARF
AT4G02020	EZA1|SDG10|SWN	SET	MIR167c	AT5G37020	ARF8|ATARF8	ARF
AT5G04940	SUVH1	SET	MIR167c	AT5G37020	ARF8|ATARF8	ARF
AT2G16390	CHR35|DMS1|DRD1	SNF2	MIR167c	AT5G37020	ARF8|ATARF8	ARF
AT2G46020	ATBRM|BRM|CHA2|CHR2	SNF2	MIR167c	AT5G37020	ARF8|ATARF8	ARF
AT2G38470	ATWRKY33|WRKY33	WRKY	MIR167c	AT5G37020	ARF8|ATARF8	ARF
AT4G31800	ATWRKY18|WRKY18	WRKY	MIR167c	AT5G37020	ARF8|ATARF8	ARF
AT2G46270	GBF3	bZIP	MIR828	AT5G52600	AtMYB82|MYB82	MYB
AT3G10390	FLD	SWI/SNF-SWI3	MIR828	AT5G52600	AtMYB82|MYB82	MYB
AT3G16857	ARR1|RR1	ARR-B	MIR159a	AT5G55020	ATMYB120|MYB120	MYB
AT1G09530	PAP3|PIF3|POC1	bHLH	MIR159a	AT5G55020	ATMYB120|MYB120	MYB
AT2G46270	GBF3	bZIP	MIR159a	AT5G55020	ATMYB120|MYB120	MYB
AT5G04340	C2H2|CZF2|ZAT6	C2H2	MIR159a	AT5G55020	ATMYB120|MYB120	MYB
AT1G21970	AtLEC1|EMB|EMB212|LEC1|NF-YB9	CCAAT	MIR159a	AT5G55020	ATMYB120|MYB120	MYB
AT5G47640	NF-YB2	CCAAT	MIR159a	AT5G55020	ATMYB120|MYB120	MYB
AT2G01570	RGA|RGA1	GRAS	MIR159a	AT5G55020	ATMYB120|MYB120	MYB
AT2G46680	ATHB-7|ATHB7|HB-7	HB	MIR159a	AT5G55020	ATMYB120|MYB120	MYB
AT4G37790	HAT22	HB	MIR159a	AT5G55020	ATMYB120|MYB120	MYB
AT5G65310	ATHB-5|ATHB5|HB5	HB	MIR159a	AT5G55020	ATMYB120|MYB120	MYB
AT5G61850	LFY|LFY3	LFY	MIR159a	AT5G55020	ATMYB120|MYB120	MYB
AT1G49950	ATTRB1|TRB1	MYB-related	MIR159a	AT5G55020	ATMYB120|MYB120	MYB
AT2G28290	CHR3|SYD	SNF2	MIR159a	AT5G55020	ATMYB120|MYB120	MYB
AT3G10390	FLD	SWI/SNF-SWI3	MIR159a	AT5G55020	ATMYB120|MYB120	MYB
AT3G16857	ARR1|RR1	ARR-B	MIR159b	AT5G55020	ATMYB120|MYB120	MYB
AT1G09530	PAP3|PIF3|POC1	bHLH	MIR159b	AT5G55020	ATMYB120|MYB120	MYB
AT2G46270	GBF3	bZIP	MIR159b	AT5G55020	ATMYB120|MYB120	MYB
AT5G04340	C2H2|CZF2|ZAT6	C2H2	MIR159b	AT5G55020	ATMYB120|MYB120	MYB
AT1G21970	AtLEC1|EMB|EMB212|LEC1|NF-YB9	CCAAT	MIR159b	AT5G55020	ATMYB120|MYB120	MYB
AT5G47640	NF-YB2	CCAAT	MIR159b	AT5G55020	ATMYB120|MYB120	MYB
AT2G01570	RGA|RGA1	GRAS	MIR159b	AT5G55020	ATMYB120|MYB120	MYB
AT2G46680	ATHB-7|ATHB7|HB-7	HB	MIR159b	AT5G55020	ATMYB120|MYB120	MYB
AT4G37790	HAT22	HB	MIR159b	AT5G55020	ATMYB120|MYB120	MYB
AT5G65310	ATHB-5|ATHB5|HB5	HB	MIR159b	AT5G55020	ATMYB120|MYB120	MYB
AT5G61850	LFY|LFY3	LFY	MIR159b	AT5G55020	ATMYB120|MYB120	MYB
AT2G28290	CHR3|SYD	SNF2	MIR159b	AT5G55020	ATMYB120|MYB120	MYB
AT3G10390	FLD	SWI/SNF-SWI3	MIR159b	AT5G55020	ATMYB120|MYB120	MYB
AT2G46270	GBF3	bZIP	MIR159c	AT5G55020	ATMYB120|MYB120	MYB
AT3G58190	ASL16|LBD29	LBD	MIR159c	AT5G55020	ATMYB120|MYB120	MYB
AT2G28290	CHR3|SYD	SNF2	MIR159c	AT5G55020	ATMYB120|MYB120	MYB
AT3G16857	ARR1|RR1	ARR-B	MIR5658	AT5G55020	ATMYB120|MYB120	MYB
AT1G09530	PAP3|PIF3|POC1	bHLH	MIR5658	AT5G55020	ATMYB120|MYB120	MYB
AT2G46270	GBF3	bZIP	MIR5658	AT5G55020	ATMYB120|MYB120	MYB
AT3G48430	JMJ12|REF6	C2H2	MIR5658	AT5G55020	ATMYB120|MYB120	MYB
AT5G04340	C2H2|CZF2|ZAT6	C2H2	MIR5658	AT5G55020	ATMYB120|MYB120	MYB
AT5G47640	NF-YB2	CCAAT	MIR5658	AT5G55020	ATMYB120|MYB120	MYB
AT2G46680	ATHB-7|ATHB7|HB-7	HB	MIR5658	AT5G55020	ATMYB120|MYB120	MYB
AT4G37790	HAT22	HB	MIR5658	AT5G55020	ATMYB120|MYB120	MYB
AT5G65310	ATHB-5|ATHB5|HB5	HB	MIR5658	AT5G55020	ATMYB120|MYB120	MYB
AT5G61850	LFY|LFY3	LFY	MIR5658	AT5G55020	ATMYB120|MYB120	MYB
AT2G28290	CHR3|SYD	SNF2	MIR5658	AT5G55020	ATMYB120|MYB120	MYB
AT3G10390	FLD	SWI/SNF-SWI3	MIR5658	AT5G55020	ATMYB120|MYB120	MYB
AT3G16857	ARR1|RR1	ARR-B	MIR858b	AT5G55020	ATMYB120|MYB120	MYB
AT2G46270	GBF3	bZIP	MIR858b	AT5G55020	ATMYB120|MYB120	MYB
AT5G04340	C2H2|CZF2|ZAT6	C2H2	MIR858b	AT5G55020	ATMYB120|MYB120	MYB
AT1G21970	AtLEC1|EMB|EMB212|LEC1|NF-YB9	CCAAT	MIR858b	AT5G55020	ATMYB120|MYB120	MYB
AT5G47640	NF-YB2	CCAAT	MIR858b	AT5G55020	ATMYB120|MYB120	MYB
AT2G01570	RGA|RGA1	GRAS	MIR858b	AT5G55020	ATMYB120|MYB120	MYB
AT2G46680	ATHB-7|ATHB7|HB-7	HB	MIR858b	AT5G55020	ATMYB120|MYB120	MYB
AT5G61850	LFY|LFY3	LFY	MIR858b	AT5G55020	ATMYB120|MYB120	MYB
AT1G49950	ATTRB1|TRB1	MYB-related	MIR858b	AT5G55020	ATMYB120|MYB120	MYB
AT5G17430	BBM	AP2-EREBP	MIR165a	AT5G60690	IFL|IFL1|REV	HB
AT2G01760	ARR14|RR14	ARR-B	MIR165a	AT5G60690	IFL|IFL1|REV	HB
AT3G16857	ARR1|RR1	ARR-B	MIR165a	AT5G60690	IFL|IFL1|REV	HB
AT5G53210	SPCH	bHLH	MIR165a	AT5G60690	IFL|IFL1|REV	HB
AT2G41070	ATBZIP12|DPBF4|EEL	bZIP	MIR165a	AT5G60690	IFL|IFL1|REV	HB
AT2G46270	GBF3	bZIP	MIR165a	AT5G60690	IFL|IFL1|REV	HB
AT4G01120	ATBZIP54|GBF2	bZIP	MIR165a	AT5G60690	IFL|IFL1|REV	HB
AT4G34000	ABF3|AtABF3|DPBF5	bZIP	MIR165a	AT5G60690	IFL|IFL1|REV	HB
AT5G11260	HY5|TED	bZIP	MIR165a	AT5G60690	IFL|IFL1|REV	HB
AT5G04340	C2H2|CZF2|ZAT6	C2H2	MIR165a	AT5G60690	IFL|IFL1|REV	HB
AT5G47640	NF-YB2	CCAAT	MIR165a	AT5G60690	IFL|IFL1|REV	HB
AT4G37790	HAT22	HB	MIR165a	AT5G60690	IFL|IFL1|REV	HB
AT5G02030	BLH9|BLR|HB-6|LSN|PNY|RPL|VAN	HB	MIR165a	AT5G60690	IFL|IFL1|REV	HB
AT5G65310	ATHB-5|ATHB5|HB5	HB	MIR165a	AT5G60690	IFL|IFL1|REV	HB
AT1G24260	AGL9|SEP3	MADS	MIR165a	AT5G60690	IFL|IFL1|REV	HB
AT5G60910	AGL8|FUL	MADS	MIR165a	AT5G60690	IFL|IFL1|REV	HB
AT1G22640	ATMYB3|MYB3	MYB	MIR165a	AT5G60690	IFL|IFL1|REV	HB
AT5G04760		MYB	MIR165a	AT5G60690	IFL|IFL1|REV	HB
AT5G67300	ATMYB44|ATMYBR1|MYB44|MYBR1	MYB	MIR165a	AT5G60690	IFL|IFL1|REV	HB
AT3G11100		Trihelix	MIR165a	AT5G60690	IFL|IFL1|REV	HB
AT1G80840	ATWRKY40|WRKY40	WRKY	MIR165a	AT5G60690	IFL|IFL1|REV	HB
AT4G31800	ATWRKY18|WRKY18	WRKY	MIR165a	AT5G60690	IFL|IFL1|REV	HB
AT4G37750	ANT|CKC|CKC1|DRG	AP2-EREBP	MIR165b	AT5G60690	IFL|IFL1|REV	HB
AT5G17430	BBM	AP2-EREBP	MIR165b	AT5G60690	IFL|IFL1|REV	HB
AT2G01760	ARR14|RR14	ARR-B	MIR165b	AT5G60690	IFL|IFL1|REV	HB
AT5G53210	SPCH	bHLH	MIR165b	AT5G60690	IFL|IFL1|REV	HB
AT5G04340	C2H2|CZF2|ZAT6	C2H2	MIR165b	AT5G60690	IFL|IFL1|REV	HB
AT5G47640	NF-YB2	CCAAT	MIR165b	AT5G60690	IFL|IFL1|REV	HB
AT5G18960	FRS12	FAR1	MIR165b	AT5G60690	IFL|IFL1|REV	HB
AT4G37790	HAT22	HB	MIR165b	AT5G60690	IFL|IFL1|REV	HB
AT5G02030	BLH9|BLR|HB-6|LSN|PNY|RPL|VAN	HB	MIR165b	AT5G60690	IFL|IFL1|REV	HB
AT5G65310	ATHB-5|ATHB5|HB5	HB	MIR165b	AT5G60690	IFL|IFL1|REV	HB
AT5G16820	ATHSF3|ATHSFA1B|HSF3|HSFA1B	HSF	MIR165b	AT5G60690	IFL|IFL1|REV	HB
AT1G24260	AGL9|SEP3	MADS	MIR165b	AT5G60690	IFL|IFL1|REV	HB
AT1G69120	AGL7|AP1	MADS	MIR165b	AT5G60690	IFL|IFL1|REV	HB
AT5G60910	AGL8|FUL	MADS	MIR165b	AT5G60690	IFL|IFL1|REV	HB
AT1G22640	ATMYB3|MYB3	MYB	MIR165b	AT5G60690	IFL|IFL1|REV	HB
AT5G04760		MYB	MIR165b	AT5G60690	IFL|IFL1|REV	HB
AT3G01460	ATMBD9|MBD9	PHD	MIR165b	AT5G60690	IFL|IFL1|REV	HB
AT4G14720	PPD2|TIFY4B	Tify	MIR165b	AT5G60690	IFL|IFL1|REV	HB
AT1G80840	ATWRKY40|WRKY40	WRKY	MIR165b	AT5G60690	IFL|IFL1|REV	HB
AT4G31800	ATWRKY18|WRKY18	WRKY	MIR165b	AT5G60690	IFL|IFL1|REV	HB
AT5G17430	BBM	AP2-EREBP	MIR166a	AT5G60690	IFL|IFL1|REV	HB
AT2G01760	ARR14|RR14	ARR-B	MIR166a	AT5G60690	IFL|IFL1|REV	HB
AT3G16857	ARR1|RR1	ARR-B	MIR166a	AT5G60690	IFL|IFL1|REV	HB
AT4G31920	ARR10|RR10	ARR-B	MIR166a	AT5G60690	IFL|IFL1|REV	HB
AT5G42520	ATBPC6|BBR/BPC6|BPC6	BBR-BPC	MIR166a	AT5G60690	IFL|IFL1|REV	HB
AT1G32640	ATMYC2|JAI1|JIN1|MYC2|RD22BP1|ZBF1	bHLH	MIR166a	AT5G60690	IFL|IFL1|REV	HB
AT2G43010	AtPIF4|PIF4|SRL2	bHLH	MIR166a	AT5G60690	IFL|IFL1|REV	HB
AT5G53210	SPCH	bHLH	MIR166a	AT5G60690	IFL|IFL1|REV	HB
AT2G46270	GBF3	bZIP	MIR166a	AT5G60690	IFL|IFL1|REV	HB
AT4G01120	ATBZIP54|GBF2	bZIP	MIR166a	AT5G60690	IFL|IFL1|REV	HB
AT4G34000	ABF3|AtABF3|DPBF5	bZIP	MIR166a	AT5G60690	IFL|IFL1|REV	HB
AT5G11260	HY5|TED	bZIP	MIR166a	AT5G60690	IFL|IFL1|REV	HB
AT5G04340	C2H2|CZF2|ZAT6	C2H2	MIR166a	AT5G60690	IFL|IFL1|REV	HB
AT1G21970	AtLEC1|EMB|EMB212|LEC1|NF-YB9	CCAAT	MIR166a	AT5G60690	IFL|IFL1|REV	HB
AT1G56170	ATHAP5B|HAP5B|NF-YC2	CCAAT	MIR166a	AT5G60690	IFL|IFL1|REV	HB
AT5G47640	NF-YB2	CCAAT	MIR166a	AT5G60690	IFL|IFL1|REV	HB
AT5G18960	FRS12	FAR1	MIR166a	AT5G60690	IFL|IFL1|REV	HB
AT2G17950	PGA6|WUS|WUS1	HB	MIR166a	AT5G60690	IFL|IFL1|REV	HB
AT2G22430	ATHB6|HB6	HB	MIR166a	AT5G60690	IFL|IFL1|REV	HB
AT2G46680	ATHB-7|ATHB7|HB-7	HB	MIR166a	AT5G60690	IFL|IFL1|REV	HB
AT4G37790	HAT22	HB	MIR166a	AT5G60690	IFL|IFL1|REV	HB
AT5G60690	IFL|IFL1|REV	HB	MIR166a	AT5G60690	IFL|IFL1|REV	HB
AT5G65310	ATHB-5|ATHB5|HB5	HB	MIR166a	AT5G60690	IFL|IFL1|REV	HB
AT1G24260	AGL9|SEP3	MADS	MIR166a	AT5G60690	IFL|IFL1|REV	HB
AT5G60910	AGL8|FUL	MADS	MIR166a	AT5G60690	IFL|IFL1|REV	HB
AT1G22640	ATMYB3|MYB3	MYB	MIR166a	AT5G60690	IFL|IFL1|REV	HB
AT5G04760		MYB	MIR166a	AT5G60690	IFL|IFL1|REV	HB
AT5G67300	ATMYB44|ATMYBR1|MYB44|MYBR1	MYB	MIR166a	AT5G60690	IFL|IFL1|REV	HB
AT1G77450	anac032|NAC032	NAC	MIR166a	AT5G60690	IFL|IFL1|REV	HB
AT4G27410	ANAC072|RD26	NAC	MIR166a	AT5G60690	IFL|IFL1|REV	HB
AT5G63790	ANAC102|NAC102	NAC	MIR166a	AT5G60690	IFL|IFL1|REV	HB
AT2G46020	ATBRM|BRM|CHA2|CHR2	SNF2	MIR166a	AT5G60690	IFL|IFL1|REV	HB
AT3G10390	FLD	SWI/SNF-SWI3	MIR166a	AT5G60690	IFL|IFL1|REV	HB
AT4G16310	LDL3	SWI/SNF-SWI3	MIR166a	AT5G60690	IFL|IFL1|REV	HB
AT3G15030	MEE35|TCP4	TCP	MIR166a	AT5G60690	IFL|IFL1|REV	HB
AT4G14720	PPD2|TIFY4B	Tify	MIR166a	AT5G60690	IFL|IFL1|REV	HB
AT1G80840	ATWRKY40|WRKY40	WRKY	MIR166a	AT5G60690	IFL|IFL1|REV	HB
AT4G31800	ATWRKY18|WRKY18	WRKY	MIR166a	AT5G60690	IFL|IFL1|REV	HB
AT4G37750	ANT|CKC|CKC1|DRG	AP2-EREBP	MIR166b	AT5G60690	IFL|IFL1|REV	HB
AT5G17430	BBM	AP2-EREBP	MIR166b	AT5G60690	IFL|IFL1|REV	HB
AT2G01760	ARR14|RR14	ARR-B	MIR166b	AT5G60690	IFL|IFL1|REV	HB
AT3G16857	ARR1|RR1	ARR-B	MIR166b	AT5G60690	IFL|IFL1|REV	HB
AT5G42520	ATBPC6|BBR/BPC6|BPC6	BBR-BPC	MIR166b	AT5G60690	IFL|IFL1|REV	HB
AT5G53210	SPCH	bHLH	MIR166b	AT5G60690	IFL|IFL1|REV	HB
AT2G46270	GBF3	bZIP	MIR166b	AT5G60690	IFL|IFL1|REV	HB
AT4G34000	ABF3|AtABF3|DPBF5	bZIP	MIR166b	AT5G60690	IFL|IFL1|REV	HB
AT5G11260	HY5|TED	bZIP	MIR166b	AT5G60690	IFL|IFL1|REV	HB
AT5G04340	C2H2|CZF2|ZAT6	C2H2	MIR166b	AT5G60690	IFL|IFL1|REV	HB
AT1G21970	AtLEC1|EMB|EMB212|LEC1|NF-YB9	CCAAT	MIR166b	AT5G60690	IFL|IFL1|REV	HB
AT5G47640	NF-YB2	CCAAT	MIR166b	AT5G60690	IFL|IFL1|REV	HB
AT5G16560	KAN|KAN1	G2-like	MIR166b	AT5G60690	IFL|IFL1|REV	HB
AT4G37790	HAT22	HB	MIR166b	AT5G60690	IFL|IFL1|REV	HB
AT5G02030	BLH9|BLR|HB-6|LSN|PNY|RPL|VAN	HB	MIR166b	AT5G60690	IFL|IFL1|REV	HB
AT5G65310	ATHB-5|ATHB5|HB5	HB	MIR166b	AT5G60690	IFL|IFL1|REV	HB
AT1G24260	AGL9|SEP3	MADS	MIR166b	AT5G60690	IFL|IFL1|REV	HB
AT1G69120	AGL7|AP1	MADS	MIR166b	AT5G60690	IFL|IFL1|REV	HB
AT4G18960	AG	MADS	MIR166b	AT5G60690	IFL|IFL1|REV	HB
AT5G20240	PI	MADS	MIR166b	AT5G60690	IFL|IFL1|REV	HB
AT5G60910	AGL8|FUL	MADS	MIR166b	AT5G60690	IFL|IFL1|REV	HB
AT5G04760		MYB	MIR166b	AT5G60690	IFL|IFL1|REV	HB
AT4G27410	ANAC072|RD26	NAC	MIR166b	AT5G60690	IFL|IFL1|REV	HB
AT2G46020	ATBRM|BRM|CHA2|CHR2	SNF2	MIR166b	AT5G60690	IFL|IFL1|REV	HB
AT3G10390	FLD	SWI/SNF-SWI3	MIR166b	AT5G60690	IFL|IFL1|REV	HB
AT1G80840	ATWRKY40|WRKY40	WRKY	MIR166b	AT5G60690	IFL|IFL1|REV	HB
AT4G31800	ATWRKY18|WRKY18	WRKY	MIR166b	AT5G60690	IFL|IFL1|REV	HB
AT5G17430	BBM	AP2-EREBP	MIR166c	AT5G60690	IFL|IFL1|REV	HB
AT2G01760	ARR14|RR14	ARR-B	MIR166c	AT5G60690	IFL|IFL1|REV	HB
AT3G16857	ARR1|RR1	ARR-B	MIR166c	AT5G60690	IFL|IFL1|REV	HB
AT4G31920	ARR10|RR10	ARR-B	MIR166c	AT5G60690	IFL|IFL1|REV	HB
AT5G53210	SPCH	bHLH	MIR166c	AT5G60690	IFL|IFL1|REV	HB
AT4G01120	ATBZIP54|GBF2	bZIP	MIR166c	AT5G60690	IFL|IFL1|REV	HB
AT4G34000	ABF3|AtABF3|DPBF5	bZIP	MIR166c	AT5G60690	IFL|IFL1|REV	HB
AT5G04340	C2H2|CZF2|ZAT6	C2H2	MIR166c	AT5G60690	IFL|IFL1|REV	HB
AT5G18960	FRS12	FAR1	MIR166c	AT5G60690	IFL|IFL1|REV	HB
AT2G22430	ATHB6|HB6	HB	MIR166c	AT5G60690	IFL|IFL1|REV	HB
AT2G46680	ATHB-7|ATHB7|HB-7	HB	MIR166c	AT5G60690	IFL|IFL1|REV	HB
AT4G37790	HAT22	HB	MIR166c	AT5G60690	IFL|IFL1|REV	HB
AT5G02030	BLH9|BLR|HB-6|LSN|PNY|RPL|VAN	HB	MIR166c	AT5G60690	IFL|IFL1|REV	HB
AT5G65310	ATHB-5|ATHB5|HB5	HB	MIR166c	AT5G60690	IFL|IFL1|REV	HB
AT5G16820	ATHSF3|ATHSFA1B|HSF3|HSFA1B	HSF	MIR166c	AT5G60690	IFL|IFL1|REV	HB
AT1G24260	AGL9|SEP3	MADS	MIR166c	AT5G60690	IFL|IFL1|REV	HB
AT1G69120	AGL7|AP1	MADS	MIR166c	AT5G60690	IFL|IFL1|REV	HB
AT3G54340	AP3|ATAP3	MADS	MIR166c	AT5G60690	IFL|IFL1|REV	HB
AT4G18960	AG	MADS	MIR166c	AT5G60690	IFL|IFL1|REV	HB
AT5G20240	PI	MADS	MIR166c	AT5G60690	IFL|IFL1|REV	HB
AT5G60910	AGL8|FUL	MADS	MIR166c	AT5G60690	IFL|IFL1|REV	HB
AT1G22640	ATMYB3|MYB3	MYB	MIR166c	AT5G60690	IFL|IFL1|REV	HB
AT5G04760		MYB	MIR166c	AT5G60690	IFL|IFL1|REV	HB
AT5G67300	ATMYB44|ATMYBR1|MYB44|MYBR1	MYB	MIR166c	AT5G60690	IFL|IFL1|REV	HB
AT4G27410	ANAC072|RD26	NAC	MIR166c	AT5G60690	IFL|IFL1|REV	HB
AT3G01460	ATMBD9|MBD9	PHD	MIR166c	AT5G60690	IFL|IFL1|REV	HB
AT1G80840	ATWRKY40|WRKY40	WRKY	MIR166c	AT5G60690	IFL|IFL1|REV	HB
AT4G31800	ATWRKY18|WRKY18	WRKY	MIR166c	AT5G60690	IFL|IFL1|REV	HB
AT5G17430	BBM	AP2-EREBP	MIR166d	AT5G60690	IFL|IFL1|REV	HB
AT2G01760	ARR14|RR14	ARR-B	MIR166d	AT5G60690	IFL|IFL1|REV	HB
AT3G16857	ARR1|RR1	ARR-B	MIR166d	AT5G60690	IFL|IFL1|REV	HB
AT4G31920	ARR10|RR10	ARR-B	MIR166d	AT5G60690	IFL|IFL1|REV	HB
AT5G53210	SPCH	bHLH	MIR166d	AT5G60690	IFL|IFL1|REV	HB
AT4G01120	ATBZIP54|GBF2	bZIP	MIR166d	AT5G60690	IFL|IFL1|REV	HB
AT4G34000	ABF3|AtABF3|DPBF5	bZIP	MIR166d	AT5G60690	IFL|IFL1|REV	HB
AT5G04340	C2H2|CZF2|ZAT6	C2H2	MIR166d	AT5G60690	IFL|IFL1|REV	HB
AT5G18960	FRS12	FAR1	MIR166d	AT5G60690	IFL|IFL1|REV	HB
AT2G22430	ATHB6|HB6	HB	MIR166d	AT5G60690	IFL|IFL1|REV	HB
AT2G46680	ATHB-7|ATHB7|HB-7	HB	MIR166d	AT5G60690	IFL|IFL1|REV	HB
AT4G37790	HAT22	HB	MIR166d	AT5G60690	IFL|IFL1|REV	HB
AT5G02030	BLH9|BLR|HB-6|LSN|PNY|RPL|VAN	HB	MIR166d	AT5G60690	IFL|IFL1|REV	HB
AT5G65310	ATHB-5|ATHB5|HB5	HB	MIR166d	AT5G60690	IFL|IFL1|REV	HB
AT5G16820	ATHSF3|ATHSFA1B|HSF3|HSFA1B	HSF	MIR166d	AT5G60690	IFL|IFL1|REV	HB
AT1G24260	AGL9|SEP3	MADS	MIR166d	AT5G60690	IFL|IFL1|REV	HB
AT1G69120	AGL7|AP1	MADS	MIR166d	AT5G60690	IFL|IFL1|REV	HB
AT3G54340	AP3|ATAP3	MADS	MIR166d	AT5G60690	IFL|IFL1|REV	HB
AT4G18960	AG	MADS	MIR166d	AT5G60690	IFL|IFL1|REV	HB
AT5G20240	PI	MADS	MIR166d	AT5G60690	IFL|IFL1|REV	HB
AT5G60910	AGL8|FUL	MADS	MIR166d	AT5G60690	IFL|IFL1|REV	HB
AT1G22640	ATMYB3|MYB3	MYB	MIR166d	AT5G60690	IFL|IFL1|REV	HB
AT5G04760		MYB	MIR166d	AT5G60690	IFL|IFL1|REV	HB
AT5G67300	ATMYB44|ATMYBR1|MYB44|MYBR1	MYB	MIR166d	AT5G60690	IFL|IFL1|REV	HB
AT4G27410	ANAC072|RD26	NAC	MIR166d	AT5G60690	IFL|IFL1|REV	HB
AT3G01460	ATMBD9|MBD9	PHD	MIR166d	AT5G60690	IFL|IFL1|REV	HB
AT1G80840	ATWRKY40|WRKY40	WRKY	MIR166d	AT5G60690	IFL|IFL1|REV	HB
AT4G31800	ATWRKY18|WRKY18	WRKY	MIR166d	AT5G60690	IFL|IFL1|REV	HB
AT3G16857	ARR1|RR1	ARR-B	MIR166e	AT5G60690	IFL|IFL1|REV	HB
AT5G42520	ATBPC6|BBR/BPC6|BPC6	BBR-BPC	MIR166e	AT5G60690	IFL|IFL1|REV	HB
AT2G43010	AtPIF4|PIF4|SRL2	bHLH	MIR166e	AT5G60690	IFL|IFL1|REV	HB
AT5G53210	SPCH	bHLH	MIR166e	AT5G60690	IFL|IFL1|REV	HB
AT4G34000	ABF3|AtABF3|DPBF5	bZIP	MIR166e	AT5G60690	IFL|IFL1|REV	HB
AT4G35610		C2H2	MIR166e	AT5G60690	IFL|IFL1|REV	HB
AT5G04340	C2H2|CZF2|ZAT6	C2H2	MIR166e	AT5G60690	IFL|IFL1|REV	HB
AT5G47640	NF-YB2	CCAAT	MIR166e	AT5G60690	IFL|IFL1|REV	HB
AT5G18960	FRS12	FAR1	MIR166e	AT5G60690	IFL|IFL1|REV	HB
AT5G16560	KAN|KAN1	G2-like	MIR166e	AT5G60690	IFL|IFL1|REV	HB
AT2G17950	PGA6|WUS|WUS1	HB	MIR166e	AT5G60690	IFL|IFL1|REV	HB
AT2G22430	ATHB6|HB6	HB	MIR166e	AT5G60690	IFL|IFL1|REV	HB
AT2G46680	ATHB-7|ATHB7|HB-7	HB	MIR166e	AT5G60690	IFL|IFL1|REV	HB
AT4G37790	HAT22	HB	MIR166e	AT5G60690	IFL|IFL1|REV	HB
AT5G60690	IFL|IFL1|REV	HB	MIR166e	AT5G60690	IFL|IFL1|REV	HB
AT5G65310	ATHB-5|ATHB5|HB5	HB	MIR166e	AT5G60690	IFL|IFL1|REV	HB
AT1G24260	AGL9|SEP3	MADS	MIR166e	AT5G60690	IFL|IFL1|REV	HB
AT1G22640	ATMYB3|MYB3	MYB	MIR166e	AT5G60690	IFL|IFL1|REV	HB
AT5G04760		MYB	MIR166e	AT5G60690	IFL|IFL1|REV	HB
AT5G67300	ATMYB44|ATMYBR1|MYB44|MYBR1	MYB	MIR166e	AT5G60690	IFL|IFL1|REV	HB
AT1G80840	ATWRKY40|WRKY40	WRKY	MIR166e	AT5G60690	IFL|IFL1|REV	HB
AT4G31800	ATWRKY18|WRKY18	WRKY	MIR166e	AT5G60690	IFL|IFL1|REV	HB
AT4G14720	PPD2|TIFY4B	Tify	MIR166f	AT5G60690	IFL|IFL1|REV	HB
AT4G37750	ANT|CKC|CKC1|DRG	AP2-EREBP	MIR166g	AT5G60690	IFL|IFL1|REV	HB
AT5G17430	BBM	AP2-EREBP	MIR166g	AT5G60690	IFL|IFL1|REV	HB
AT2G01760	ARR14|RR14	ARR-B	MIR166g	AT5G60690	IFL|IFL1|REV	HB
AT3G16857	ARR1|RR1	ARR-B	MIR166g	AT5G60690	IFL|IFL1|REV	HB
AT5G53210	SPCH	bHLH	MIR166g	AT5G60690	IFL|IFL1|REV	HB
AT2G46270	GBF3	bZIP	MIR166g	AT5G60690	IFL|IFL1|REV	HB
AT4G01120	ATBZIP54|GBF2	bZIP	MIR166g	AT5G60690	IFL|IFL1|REV	HB
AT4G34000	ABF3|AtABF3|DPBF5	bZIP	MIR166g	AT5G60690	IFL|IFL1|REV	HB
AT5G11260	HY5|TED	bZIP	MIR166g	AT5G60690	IFL|IFL1|REV	HB
AT4G35610		C2H2	MIR166g	AT5G60690	IFL|IFL1|REV	HB
AT5G04340	C2H2|CZF2|ZAT6	C2H2	MIR166g	AT5G60690	IFL|IFL1|REV	HB
AT1G21970	AtLEC1|EMB|EMB212|LEC1|NF-YB9	CCAAT	MIR166g	AT5G60690	IFL|IFL1|REV	HB
AT1G56170	ATHAP5B|HAP5B|NF-YC2	CCAAT	MIR166g	AT5G60690	IFL|IFL1|REV	HB
AT5G47640	NF-YB2	CCAAT	MIR166g	AT5G60690	IFL|IFL1|REV	HB
AT2G46680	ATHB-7|ATHB7|HB-7	HB	MIR166g	AT5G60690	IFL|IFL1|REV	HB
AT4G37790	HAT22	HB	MIR166g	AT5G60690	IFL|IFL1|REV	HB
AT5G02030	BLH9|BLR|HB-6|LSN|PNY|RPL|VAN	HB	MIR166g	AT5G60690	IFL|IFL1|REV	HB
AT5G65310	ATHB-5|ATHB5|HB5	HB	MIR166g	AT5G60690	IFL|IFL1|REV	HB
AT5G16820	ATHSF3|ATHSFA1B|HSF3|HSFA1B	HSF	MIR166g	AT5G60690	IFL|IFL1|REV	HB
AT1G24260	AGL9|SEP3	MADS	MIR166g	AT5G60690	IFL|IFL1|REV	HB
AT1G69120	AGL7|AP1	MADS	MIR166g	AT5G60690	IFL|IFL1|REV	HB
AT3G54340	AP3|ATAP3	MADS	MIR166g	AT5G60690	IFL|IFL1|REV	HB
AT4G18960	AG	MADS	MIR166g	AT5G60690	IFL|IFL1|REV	HB
AT5G20240	PI	MADS	MIR166g	AT5G60690	IFL|IFL1|REV	HB
AT5G60910	AGL8|FUL	MADS	MIR166g	AT5G60690	IFL|IFL1|REV	HB
AT5G04760		MYB	MIR166g	AT5G60690	IFL|IFL1|REV	HB
AT5G67300	ATMYB44|ATMYBR1|MYB44|MYBR1	MYB	MIR166g	AT5G60690	IFL|IFL1|REV	HB
AT4G27410	ANAC072|RD26	NAC	MIR166g	AT5G60690	IFL|IFL1|REV	HB
AT5G63790	ANAC102|NAC102	NAC	MIR166g	AT5G60690	IFL|IFL1|REV	HB
AT1G80840	ATWRKY40|WRKY40	WRKY	MIR166g	AT5G60690	IFL|IFL1|REV	HB
AT4G31800	ATWRKY18|WRKY18	WRKY	MIR166g	AT5G60690	IFL|IFL1|REV	HB
AT5G04340	C2H2|CZF2|ZAT6	C2H2	MIR5021	AT5G60690	IFL|IFL1|REV	HB
AT5G47640	NF-YB2	CCAAT	MIR5021	AT5G60690	IFL|IFL1|REV	HB
AT5G18960	FRS12	FAR1	MIR5021	AT5G60690	IFL|IFL1|REV	HB
AT2G46680	ATHB-7|ATHB7|HB-7	HB	MIR5021	AT5G60690	IFL|IFL1|REV	HB
AT4G37790	HAT22	HB	MIR5021	AT5G60690	IFL|IFL1|REV	HB
AT5G65310	ATHB-5|ATHB5|HB5	HB	MIR5021	AT5G60690	IFL|IFL1|REV	HB
AT1G77300	ASHH2|CCR1|EFS|LAZ2|SDG8	SET	MIR5021	AT5G60690	IFL|IFL1|REV	HB
AT2G28290	CHR3|SYD	SNF2	MIR5021	AT5G60690	IFL|IFL1|REV	HB
AT5G05410	DREB2|DREB2A	AP2-EREBP	MIR866	AT5G62000	ARF1-BP|ARF2|HSS|ORE14	ARF
AT2G01760	ARR14|RR14	ARR-B	MIR866	AT5G62000	ARF1-BP|ARF2|HSS|ORE14	ARF
AT2G25180	ARR12|RR12	ARR-B	MIR866	AT5G62000	ARF1-BP|ARF2|HSS|ORE14	ARF
AT3G16857	ARR1|RR1	ARR-B	MIR866	AT5G62000	ARF1-BP|ARF2|HSS|ORE14	ARF
AT4G31920	ARR10|RR10	ARR-B	MIR866	AT5G62000	ARF1-BP|ARF2|HSS|ORE14	ARF
AT2G43010	AtPIF4|PIF4|SRL2	bHLH	MIR866	AT5G62000	ARF1-BP|ARF2|HSS|ORE14	ARF
AT3G59060	PIF5|PIL6	bHLH	MIR866	AT5G62000	ARF1-BP|ARF2|HSS|ORE14	ARF
AT5G53210	SPCH	bHLH	MIR866	AT5G62000	ARF1-BP|ARF2|HSS|ORE14	ARF
AT1G32150	AtbZIP68|bZIP68	bZIP	MIR866	AT5G62000	ARF1-BP|ARF2|HSS|ORE14	ARF
AT1G49720	ABF1|AtABF1	bZIP	MIR866	AT5G62000	ARF1-BP|ARF2|HSS|ORE14	ARF
AT2G36270	ABI5|AtABI5|GIA1	bZIP	MIR866	AT5G62000	ARF1-BP|ARF2|HSS|ORE14	ARF
AT2G41070	ATBZIP12|DPBF4|EEL	bZIP	MIR866	AT5G62000	ARF1-BP|ARF2|HSS|ORE14	ARF
AT2G46270	GBF3	bZIP	MIR866	AT5G62000	ARF1-BP|ARF2|HSS|ORE14	ARF
AT3G19290	ABF4|AREB2	bZIP	MIR866	AT5G62000	ARF1-BP|ARF2|HSS|ORE14	ARF
AT4G01120	ATBZIP54|GBF2	bZIP	MIR866	AT5G62000	ARF1-BP|ARF2|HSS|ORE14	ARF
AT4G34000	ABF3|AtABF3|DPBF5	bZIP	MIR866	AT5G62000	ARF1-BP|ARF2|HSS|ORE14	ARF
AT4G35900	atbzip14|FD|FD-1	bZIP	MIR866	AT5G62000	ARF1-BP|ARF2|HSS|ORE14	ARF
AT5G11260	HY5|TED	bZIP	MIR866	AT5G62000	ARF1-BP|ARF2|HSS|ORE14	ARF
AT5G04340	C2H2|CZF2|ZAT6	C2H2	MIR866	AT5G62000	ARF1-BP|ARF2|HSS|ORE14	ARF
AT1G21970	AtLEC1|EMB|EMB212|LEC1|NF-YB9	CCAAT	MIR866	AT5G62000	ARF1-BP|ARF2|HSS|ORE14	ARF
AT1G56170	ATHAP5B|HAP5B|NF-YC2	CCAAT	MIR866	AT5G62000	ARF1-BP|ARF2|HSS|ORE14	ARF
AT5G47640	NF-YB2	CCAAT	MIR866	AT5G62000	ARF1-BP|ARF2|HSS|ORE14	ARF
AT2G22430	ATHB6|HB6	HB	MIR866	AT5G62000	ARF1-BP|ARF2|HSS|ORE14	ARF
AT2G46680	ATHB-7|ATHB7|HB-7	HB	MIR866	AT5G62000	ARF1-BP|ARF2|HSS|ORE14	ARF
AT4G37790	HAT22	HB	MIR866	AT5G62000	ARF1-BP|ARF2|HSS|ORE14	ARF
AT5G65310	ATHB-5|ATHB5|HB5	HB	MIR866	AT5G62000	ARF1-BP|ARF2|HSS|ORE14	ARF
AT5G43840	AT-HSFA6A|HSFA6A	HSF	MIR866	AT5G62000	ARF1-BP|ARF2|HSS|ORE14	ARF
AT3G58190	ASL16|LBD29	LBD	MIR866	AT5G62000	ARF1-BP|ARF2|HSS|ORE14	ARF
AT5G61850	LFY|LFY3	LFY	MIR866	AT5G62000	ARF1-BP|ARF2|HSS|ORE14	ARF
AT1G22640	ATMYB3|MYB3	MYB	MIR866	AT5G62000	ARF1-BP|ARF2|HSS|ORE14	ARF
AT5G04760		MYB	MIR866	AT5G62000	ARF1-BP|ARF2|HSS|ORE14	ARF
AT5G67300	ATMYB44|ATMYBR1|MYB44|MYBR1	MYB	MIR866	AT5G62000	ARF1-BP|ARF2|HSS|ORE14	ARF
AT1G49950	ATTRB1|TRB1	MYB-related	MIR866	AT5G62000	ARF1-BP|ARF2|HSS|ORE14	ARF
AT1G77450	anac032|NAC032	NAC	MIR866	AT5G62000	ARF1-BP|ARF2|HSS|ORE14	ARF
AT4G27410	ANAC072|RD26	NAC	MIR866	AT5G62000	ARF1-BP|ARF2|HSS|ORE14	ARF
AT5G63790	ANAC102|NAC102	NAC	MIR866	AT5G62000	ARF1-BP|ARF2|HSS|ORE14	ARF
AT5G04940	SUVH1	SET	MIR866	AT5G62000	ARF1-BP|ARF2|HSS|ORE14	ARF
AT2G28290	CHR3|SYD	SNF2	MIR866	AT5G62000	ARF1-BP|ARF2|HSS|ORE14	ARF
AT4G14720	PPD2|TIFY4B	Tify	MIR866	AT5G62000	ARF1-BP|ARF2|HSS|ORE14	ARF
AT3G11100		Trihelix	MIR866	AT5G62000	ARF1-BP|ARF2|HSS|ORE14	ARF
AT2G38470	ATWRKY33|WRKY33	WRKY	MIR866	AT5G62000	ARF1-BP|ARF2|HSS|ORE14	ARF
AT5G17430	BBM	AP2-EREBP	MIR396b	AT1G01520	ASG4	MYB-related
AT2G01760	ARR14|RR14	ARR-B	MIR396b	AT1G01520	ASG4	MYB-related
AT3G16857	ARR1|RR1	ARR-B	MIR396b	AT1G01520	ASG4	MYB-related
AT2G43010	AtPIF4|PIF4|SRL2	bHLH	MIR396b	AT1G01520	ASG4	MYB-related
AT5G53210	SPCH	bHLH	MIR396b	AT1G01520	ASG4	MYB-related
AT1G49720	ABF1|AtABF1	bZIP	MIR396b	AT1G01520	ASG4	MYB-related
AT2G41070	ATBZIP12|DPBF4|EEL	bZIP	MIR396b	AT1G01520	ASG4	MYB-related
AT2G46270	GBF3	bZIP	MIR396b	AT1G01520	ASG4	MYB-related
AT3G19290	ABF4|AREB2	bZIP	MIR396b	AT1G01520	ASG4	MYB-related
AT4G01120	ATBZIP54|GBF2	bZIP	MIR396b	AT1G01520	ASG4	MYB-related
AT4G34000	ABF3|AtABF3|DPBF5	bZIP	MIR396b	AT1G01520	ASG4	MYB-related
AT3G48430	JMJ12|REF6	C2H2	MIR396b	AT1G01520	ASG4	MYB-related
AT1G56170	ATHAP5B|HAP5B|NF-YC2	CCAAT	MIR396b	AT1G01520	ASG4	MYB-related
AT5G47640	NF-YB2	CCAAT	MIR396b	AT1G01520	ASG4	MYB-related
AT2G01570	RGA|RGA1	GRAS	MIR396b	AT1G01520	ASG4	MYB-related
AT5G04760		MYB	MIR396b	AT1G01520	ASG4	MYB-related
AT5G67300	ATMYB44|ATMYBR1|MYB44|MYBR1	MYB	MIR396b	AT1G01520	ASG4	MYB-related
AT2G46020	ATBRM|BRM|CHA2|CHR2	SNF2	MIR396b	AT1G01520	ASG4	MYB-related
AT3G16857	ARR1|RR1	ARR-B	MIR414	AT1G04050	SDG13|SUVR1	SET
AT2G43010	AtPIF4|PIF4|SRL2	bHLH	MIR414	AT1G04050	SDG13|SUVR1	SET
AT5G67060	HEC1	bHLH	MIR414	AT1G04050	SDG13|SUVR1	SET
AT4G34000	ABF3|AtABF3|DPBF5	bZIP	MIR414	AT1G04050	SDG13|SUVR1	SET
AT5G04340	C2H2|CZF2|ZAT6	C2H2	MIR414	AT1G04050	SDG13|SUVR1	SET
AT5G47640	NF-YB2	CCAAT	MIR414	AT1G04050	SDG13|SUVR1	SET
AT2G01570	RGA|RGA1	GRAS	MIR414	AT1G04050	SDG13|SUVR1	SET
AT2G22430	ATHB6|HB6	HB	MIR414	AT1G04050	SDG13|SUVR1	SET
AT2G46680	ATHB-7|ATHB7|HB-7	HB	MIR414	AT1G04050	SDG13|SUVR1	SET
AT4G37790	HAT22	HB	MIR414	AT1G04050	SDG13|SUVR1	SET
AT5G65310	ATHB-5|ATHB5|HB5	HB	MIR414	AT1G04050	SDG13|SUVR1	SET
AT5G16820	ATHSF3|ATHSFA1B|HSF3|HSFA1B	HSF	MIR414	AT1G04050	SDG13|SUVR1	SET
AT1G22640	ATMYB3|MYB3	MYB	MIR414	AT1G04050	SDG13|SUVR1	SET
AT5G04760		MYB	MIR414	AT1G04050	SDG13|SUVR1	SET
AT5G67300	ATMYB44|ATMYBR1|MYB44|MYBR1	MYB	MIR414	AT1G04050	SDG13|SUVR1	SET
AT1G77450	anac032|NAC032	NAC	MIR414	AT1G04050	SDG13|SUVR1	SET
AT4G27410	ANAC072|RD26	NAC	MIR414	AT1G04050	SDG13|SUVR1	SET
AT5G63790	ANAC102|NAC102	NAC	MIR414	AT1G04050	SDG13|SUVR1	SET
AT1G80840	ATWRKY40|WRKY40	WRKY	MIR414	AT1G04050	SDG13|SUVR1	SET
AT2G38470	ATWRKY33|WRKY33	WRKY	MIR414	AT1G04050	SDG13|SUVR1	SET
AT4G31800	ATWRKY18|WRKY18	WRKY	MIR414	AT1G04050	SDG13|SUVR1	SET
AT4G31920	ARR10|RR10	ARR-B	MIR1886	AT1G06040	BBX24|STO	Orphans
AT4G37790	HAT22	HB	MIR1886	AT1G06040	BBX24|STO	Orphans
AT4G31800	ATWRKY18|WRKY18	WRKY	MIR1886	AT1G06040	BBX24|STO	Orphans
AT5G04340	C2H2|CZF2|ZAT6	C2H2	MIR5021	AT1G06070		bZIP
AT5G47640	NF-YB2	CCAAT	MIR5021	AT1G06070		bZIP
AT2G46680	ATHB-7|ATHB7|HB-7	HB	MIR5021	AT1G06070		bZIP
AT4G37790	HAT22	HB	MIR5021	AT1G06070		bZIP
AT5G65310	ATHB-5|ATHB5|HB5	HB	MIR5021	AT1G06070		bZIP
AT1G77300	ASHH2|CCR1|EFS|LAZ2|SDG8	SET	MIR5021	AT1G06070		bZIP
AT5G04340	C2H2|CZF2|ZAT6	C2H2	MIR5021	AT1G10470	ARR4|ATRR1|IBC7|MEE7	Orphans
AT5G47640	NF-YB2	CCAAT	MIR5021	AT1G10470	ARR4|ATRR1|IBC7|MEE7	Orphans
AT2G46680	ATHB-7|ATHB7|HB-7	HB	MIR5021	AT1G10470	ARR4|ATRR1|IBC7|MEE7	Orphans
AT4G37790	HAT22	HB	MIR5021	AT1G10470	ARR4|ATRR1|IBC7|MEE7	Orphans
AT5G65310	ATHB-5|ATHB5|HB5	HB	MIR5021	AT1G10470	ARR4|ATRR1|IBC7|MEE7	Orphans
AT1G77300	ASHH2|CCR1|EFS|LAZ2|SDG8	SET	MIR5021	AT1G10470	ARR4|ATRR1|IBC7|MEE7	Orphans
AT2G28290	CHR3|SYD	SNF2	MIR5021	AT1G10470	ARR4|ATRR1|IBC7|MEE7	Orphans
AT5G47640	NF-YB2	CCAAT	MIR5021	AT1G12860	ICE2|SCRM2	bHLH
AT5G65310	ATHB-5|ATHB5|HB5	HB	MIR5021	AT1G12860	ICE2|SCRM2	bHLH
AT1G77300	ASHH2|CCR1|EFS|LAZ2|SDG8	SET	MIR5021	AT1G12860	ICE2|SCRM2	bHLH
AT2G28290	CHR3|SYD	SNF2	MIR5021	AT1G12890		AP2-EREBP
AT4G32010	HSI2-L1|HSL1|VAL2	ABI3-VP1	MIR5658	AT1G14920	GAI|RGA2	GRAS
AT5G17430	BBM	AP2-EREBP	MIR5658	AT1G14920	GAI|RGA2	GRAS
AT2G01760	ARR14|RR14	ARR-B	MIR5658	AT1G14920	GAI|RGA2	GRAS
AT2G25180	ARR12|RR12	ARR-B	MIR5658	AT1G14920	GAI|RGA2	GRAS
AT3G16857	ARR1|RR1	ARR-B	MIR5658	AT1G14920	GAI|RGA2	GRAS
AT4G31920	ARR10|RR10	ARR-B	MIR5658	AT1G14920	GAI|RGA2	GRAS
AT1G09530	PAP3|PIF3|POC1	bHLH	MIR5658	AT1G14920	GAI|RGA2	GRAS
AT1G32640	ATMYC2|JAI1|JIN1|MYC2|RD22BP1|ZBF1	bHLH	MIR5658	AT1G14920	GAI|RGA2	GRAS
AT2G43010	AtPIF4|PIF4|SRL2	bHLH	MIR5658	AT1G14920	GAI|RGA2	GRAS
AT5G46760	MYC3	bHLH	MIR5658	AT1G14920	GAI|RGA2	GRAS
AT5G53210	SPCH	bHLH	MIR5658	AT1G14920	GAI|RGA2	GRAS
AT5G67060	HEC1	bHLH	MIR5658	AT1G14920	GAI|RGA2	GRAS
AT1G32150	AtbZIP68|bZIP68	bZIP	MIR5658	AT1G14920	GAI|RGA2	GRAS
AT1G49720	ABF1|AtABF1	bZIP	MIR5658	AT1G14920	GAI|RGA2	GRAS
AT2G46270	GBF3	bZIP	MIR5658	AT1G14920	GAI|RGA2	GRAS
AT3G19290	ABF4|AREB2	bZIP	MIR5658	AT1G14920	GAI|RGA2	GRAS
AT4G01120	ATBZIP54|GBF2	bZIP	MIR5658	AT1G14920	GAI|RGA2	GRAS
AT4G34000	ABF3|AtABF3|DPBF5	bZIP	MIR5658	AT1G14920	GAI|RGA2	GRAS
AT5G11260	HY5|TED	bZIP	MIR5658	AT1G14920	GAI|RGA2	GRAS
AT5G56860	GATA21|GNC	C2C2-GATA	MIR5658	AT1G14920	GAI|RGA2	GRAS
AT4G35610		C2H2	MIR5658	AT1G14920	GAI|RGA2	GRAS
AT5G04340	C2H2|CZF2|ZAT6	C2H2	MIR5658	AT1G14920	GAI|RGA2	GRAS
AT5G47640	NF-YB2	CCAAT	MIR5658	AT1G14920	GAI|RGA2	GRAS
AT5G18960	FRS12	FAR1	MIR5658	AT1G14920	GAI|RGA2	GRAS
AT2G17950	PGA6|WUS|WUS1	HB	MIR5658	AT1G14920	GAI|RGA2	GRAS
AT2G22430	ATHB6|HB6	HB	MIR5658	AT1G14920	GAI|RGA2	GRAS
AT2G46680	ATHB-7|ATHB7|HB-7	HB	MIR5658	AT1G14920	GAI|RGA2	GRAS
AT4G37790	HAT22	HB	MIR5658	AT1G14920	GAI|RGA2	GRAS
AT5G02030	BLH9|BLR|HB-6|LSN|PNY|RPL|VAN	HB	MIR5658	AT1G14920	GAI|RGA2	GRAS
AT5G65310	ATHB-5|ATHB5|HB5	HB	MIR5658	AT1G14920	GAI|RGA2	GRAS
AT5G16820	ATHSF3|ATHSFA1B|HSF3|HSFA1B	HSF	MIR5658	AT1G14920	GAI|RGA2	GRAS
AT5G61850	LFY|LFY3	LFY	MIR5658	AT1G14920	GAI|RGA2	GRAS
AT1G24260	AGL9|SEP3	MADS	MIR5658	AT1G14920	GAI|RGA2	GRAS
AT5G60910	AGL8|FUL	MADS	MIR5658	AT1G14920	GAI|RGA2	GRAS
AT1G22640	ATMYB3|MYB3	MYB	MIR5658	AT1G14920	GAI|RGA2	GRAS
AT5G04760		MYB	MIR5658	AT1G14920	GAI|RGA2	GRAS
AT5G67300	ATMYB44|ATMYBR1|MYB44|MYBR1	MYB	MIR5658	AT1G14920	GAI|RGA2	GRAS
AT1G77450	anac032|NAC032	NAC	MIR5658	AT1G14920	GAI|RGA2	GRAS
AT4G27410	ANAC072|RD26	NAC	MIR5658	AT1G14920	GAI|RGA2	GRAS
AT5G63790	ANAC102|NAC102	NAC	MIR5658	AT1G14920	GAI|RGA2	GRAS
AT5G02810	APRR7|PRR7	Pseudo ARR-B	MIR5658	AT1G14920	GAI|RGA2	GRAS
AT5G24470	APRR5|PRR5	Pseudo ARR-B	MIR5658	AT1G14920	GAI|RGA2	GRAS
AT4G24020	NLP7	RWP-RK	MIR5658	AT1G14920	GAI|RGA2	GRAS
AT1G77300	ASHH2|CCR1|EFS|LAZ2|SDG8	SET	MIR5658	AT1G14920	GAI|RGA2	GRAS
AT2G28290	CHR3|SYD	SNF2	MIR5658	AT1G14920	GAI|RGA2	GRAS
AT2G46020	ATBRM|BRM|CHA2|CHR2	SNF2	MIR5658	AT1G14920	GAI|RGA2	GRAS
AT3G10390	FLD	SWI/SNF-SWI3	MIR5658	AT1G14920	GAI|RGA2	GRAS
AT3G15030	MEE35|TCP4	TCP	MIR5658	AT1G14920	GAI|RGA2	GRAS
AT4G14720	PPD2|TIFY4B	Tify	MIR5658	AT1G14920	GAI|RGA2	GRAS
AT3G11100		Trihelix	MIR5658	AT1G14920	GAI|RGA2	GRAS
AT1G80840	ATWRKY40|WRKY40	WRKY	MIR5658	AT1G14920	GAI|RGA2	GRAS
AT2G38470	ATWRKY33|WRKY33	WRKY	MIR5658	AT1G14920	GAI|RGA2	GRAS
AT4G31800	ATWRKY18|WRKY18	WRKY	MIR5658	AT1G14920	GAI|RGA2	GRAS
AT2G46270	GBF3	bZIP	MIR169a	AT1G17590	NF-YA8	CCAAT
AT3G48430	JMJ12|REF6	C2H2	MIR169a	AT1G17590	NF-YA8	CCAAT
AT2G46680	ATHB-7|ATHB7|HB-7	HB	MIR169a	AT1G17590	NF-YA8	CCAAT
AT2G28290	CHR3|SYD	SNF2	MIR169a	AT1G17590	NF-YA8	CCAAT
AT2G46270	GBF3	bZIP	MIR169b	AT1G17590	NF-YA8	CCAAT
AT2G46680	ATHB-7|ATHB7|HB-7	HB	MIR169b	AT1G17590	NF-YA8	CCAAT
AT2G46270	GBF3	bZIP	MIR169m	AT1G17590	NF-YA8	CCAAT
AT2G46270	GBF3	bZIP	MIR169n	AT1G17590	NF-YA8	CCAAT
AT2G46270	GBF3	bZIP	MIR5650	AT1G17590	NF-YA8	CCAAT
AT2G28290	CHR3|SYD	SNF2	MIR5650	AT1G17590	NF-YA8	CCAAT
AT5G04340	C2H2|CZF2|ZAT6	C2H2	MIR5021	AT1G20696	HMGB3|NFD03|NFD3	HMG
AT5G47640	NF-YB2	CCAAT	MIR5021	AT1G20696	HMGB3|NFD03|NFD3	HMG
AT2G46680	ATHB-7|ATHB7|HB-7	HB	MIR5021	AT1G20696	HMGB3|NFD03|NFD3	HMG
AT4G37790	HAT22	HB	MIR5021	AT1G20696	HMGB3|NFD03|NFD3	HMG
AT5G65310	ATHB-5|ATHB5|HB5	HB	MIR5021	AT1G20696	HMGB3|NFD03|NFD3	HMG
AT1G77300	ASHH2|CCR1|EFS|LAZ2|SDG8	SET	MIR5021	AT1G20696	HMGB3|NFD03|NFD3	HMG
AT2G28290	CHR3|SYD	SNF2	MIR5021	AT1G20696	HMGB3|NFD03|NFD3	HMG
AT4G37790	HAT22	HB	MIR5021	AT1G24190	ATSIN3|SIN3|SNL3	Orphans
AT5G65310	ATHB-5|ATHB5|HB5	HB	MIR5021	AT1G24190	ATSIN3|SIN3|SNL3	Orphans
AT1G77300	ASHH2|CCR1|EFS|LAZ2|SDG8	SET	MIR5021	AT1G24190	ATSIN3|SIN3|SNL3	Orphans
AT2G01760	ARR14|RR14	ARR-B	MIR156a	AT1G27370	SPL10	SBP
AT3G16857	ARR1|RR1	ARR-B	MIR156a	AT1G27370	SPL10	SBP
AT5G42520	ATBPC6|BBR/BPC6|BPC6	BBR-BPC	MIR156a	AT1G27370	SPL10	SBP
AT5G53210	SPCH	bHLH	MIR156a	AT1G27370	SPL10	SBP
AT5G56860	GATA21|GNC	C2C2-GATA	MIR156a	AT1G27370	SPL10	SBP
AT5G04340	C2H2|CZF2|ZAT6	C2H2	MIR156a	AT1G27370	SPL10	SBP
AT5G47640	NF-YB2	CCAAT	MIR156a	AT1G27370	SPL10	SBP
AT5G16560	KAN|KAN1	G2-like	MIR156a	AT1G27370	SPL10	SBP
AT5G65310	ATHB-5|ATHB5|HB5	HB	MIR156a	AT1G27370	SPL10	SBP
AT1G24260	AGL9|SEP3	MADS	MIR156a	AT1G27370	SPL10	SBP
AT5G60910	AGL8|FUL	MADS	MIR156a	AT1G27370	SPL10	SBP
AT5G04760		MYB	MIR156a	AT1G27370	SPL10	SBP
AT4G27410	ANAC072|RD26	NAC	MIR156a	AT1G27370	SPL10	SBP
AT2G28290	CHR3|SYD	SNF2	MIR156a	AT1G27370	SPL10	SBP
AT2G46020	ATBRM|BRM|CHA2|CHR2	SNF2	MIR156a	AT1G27370	SPL10	SBP
AT3G10390	FLD	SWI/SNF-SWI3	MIR156a	AT1G27370	SPL10	SBP
AT1G80840	ATWRKY40|WRKY40	WRKY	MIR156a	AT1G27370	SPL10	SBP
AT4G31800	ATWRKY18|WRKY18	WRKY	MIR156a	AT1G27370	SPL10	SBP
AT2G01760	ARR14|RR14	ARR-B	MIR156b	AT1G27370	SPL10	SBP
AT3G16857	ARR1|RR1	ARR-B	MIR156b	AT1G27370	SPL10	SBP
AT5G53210	SPCH	bHLH	MIR156b	AT1G27370	SPL10	SBP
AT5G16560	KAN|KAN1	G2-like	MIR156b	AT1G27370	SPL10	SBP
AT1G24260	AGL9|SEP3	MADS	MIR156b	AT1G27370	SPL10	SBP
AT5G60910	AGL8|FUL	MADS	MIR156b	AT1G27370	SPL10	SBP
AT1G22640	ATMYB3|MYB3	MYB	MIR156b	AT1G27370	SPL10	SBP
AT2G28290	CHR3|SYD	SNF2	MIR156b	AT1G27370	SPL10	SBP
AT2G46020	ATBRM|BRM|CHA2|CHR2	SNF2	MIR156b	AT1G27370	SPL10	SBP
AT2G01760	ARR14|RR14	ARR-B	MIR156c	AT1G27370	SPL10	SBP
AT3G16857	ARR1|RR1	ARR-B	MIR156c	AT1G27370	SPL10	SBP
AT4G31920	ARR10|RR10	ARR-B	MIR156c	AT1G27370	SPL10	SBP
AT5G42520	ATBPC6|BBR/BPC6|BPC6	BBR-BPC	MIR156c	AT1G27370	SPL10	SBP
AT1G09530	PAP3|PIF3|POC1	bHLH	MIR156c	AT1G27370	SPL10	SBP
AT5G53210	SPCH	bHLH	MIR156c	AT1G27370	SPL10	SBP
AT5G56860	GATA21|GNC	C2C2-GATA	MIR156c	AT1G27370	SPL10	SBP
AT1G14580		C2H2	MIR156c	AT1G27370	SPL10	SBP
AT5G04340	C2H2|CZF2|ZAT6	C2H2	MIR156c	AT1G27370	SPL10	SBP
AT5G47640	NF-YB2	CCAAT	MIR156c	AT1G27370	SPL10	SBP
AT5G16560	KAN|KAN1	G2-like	MIR156c	AT1G27370	SPL10	SBP
AT2G01570	RGA|RGA1	GRAS	MIR156c	AT1G27370	SPL10	SBP
AT2G17950	PGA6|WUS|WUS1	HB	MIR156c	AT1G27370	SPL10	SBP
AT2G46680	ATHB-7|ATHB7|HB-7	HB	MIR156c	AT1G27370	SPL10	SBP
AT5G02030	BLH9|BLR|HB-6|LSN|PNY|RPL|VAN	HB	MIR156c	AT1G27370	SPL10	SBP
AT5G60690	IFL|IFL1|REV	HB	MIR156c	AT1G27370	SPL10	SBP
AT5G65310	ATHB-5|ATHB5|HB5	HB	MIR156c	AT1G27370	SPL10	SBP
AT1G24260	AGL9|SEP3	MADS	MIR156c	AT1G27370	SPL10	SBP
AT5G60910	AGL8|FUL	MADS	MIR156c	AT1G27370	SPL10	SBP
AT1G22640	ATMYB3|MYB3	MYB	MIR156c	AT1G27370	SPL10	SBP
AT5G04760		MYB	MIR156c	AT1G27370	SPL10	SBP
AT5G67300	ATMYB44|ATMYBR1|MYB44|MYBR1	MYB	MIR156c	AT1G27370	SPL10	SBP
AT4G27410	ANAC072|RD26	NAC	MIR156c	AT1G27370	SPL10	SBP
AT3G01460	ATMBD9|MBD9	PHD	MIR156c	AT1G27370	SPL10	SBP
AT5G24470	APRR5|PRR5	Pseudo ARR-B	MIR156c	AT1G27370	SPL10	SBP
AT2G28290	CHR3|SYD	SNF2	MIR156c	AT1G27370	SPL10	SBP
AT2G46020	ATBRM|BRM|CHA2|CHR2	SNF2	MIR156c	AT1G27370	SPL10	SBP
AT3G10390	FLD	SWI/SNF-SWI3	MIR156c	AT1G27370	SPL10	SBP
AT3G15030	MEE35|TCP4	TCP	MIR156c	AT1G27370	SPL10	SBP
AT3G11100		Trihelix	MIR156c	AT1G27370	SPL10	SBP
AT1G80840	ATWRKY40|WRKY40	WRKY	MIR156c	AT1G27370	SPL10	SBP
AT2G38470	ATWRKY33|WRKY33	WRKY	MIR156c	AT1G27370	SPL10	SBP
AT4G31800	ATWRKY18|WRKY18	WRKY	MIR156c	AT1G27370	SPL10	SBP
AT5G39760	AtHB23|HB23|ZHD10	zf-HD	MIR156c	AT1G27370	SPL10	SBP
AT1G09530	PAP3|PIF3|POC1	bHLH	MIR156d	AT1G27370	SPL10	SBP
AT5G56860	GATA21|GNC	C2C2-GATA	MIR156d	AT1G27370	SPL10	SBP
AT5G67450	AZF1|ZF1	C2H2	MIR156d	AT1G27370	SPL10	SBP
AT1G24260	AGL9|SEP3	MADS	MIR156d	AT1G27370	SPL10	SBP
AT5G60910	AGL8|FUL	MADS	MIR156d	AT1G27370	SPL10	SBP
AT5G67300	ATMYB44|ATMYBR1|MYB44|MYBR1	MYB	MIR156d	AT1G27370	SPL10	SBP
AT2G46020	ATBRM|BRM|CHA2|CHR2	SNF2	MIR156d	AT1G27370	SPL10	SBP
AT3G15030	MEE35|TCP4	TCP	MIR156d	AT1G27370	SPL10	SBP
AT3G16857	ARR1|RR1	ARR-B	MIR156e	AT1G27370	SPL10	SBP
AT4G31920	ARR10|RR10	ARR-B	MIR156e	AT1G27370	SPL10	SBP
AT1G09530	PAP3|PIF3|POC1	bHLH	MIR156e	AT1G27370	SPL10	SBP
AT5G04340	C2H2|CZF2|ZAT6	C2H2	MIR156e	AT1G27370	SPL10	SBP
AT5G47640	NF-YB2	CCAAT	MIR156e	AT1G27370	SPL10	SBP
AT5G16560	KAN|KAN1	G2-like	MIR156e	AT1G27370	SPL10	SBP
AT2G01570	RGA|RGA1	GRAS	MIR156e	AT1G27370	SPL10	SBP
AT2G17950	PGA6|WUS|WUS1	HB	MIR156e	AT1G27370	SPL10	SBP
AT5G02030	BLH9|BLR|HB-6|LSN|PNY|RPL|VAN	HB	MIR156e	AT1G27370	SPL10	SBP
AT5G65310	ATHB-5|ATHB5|HB5	HB	MIR156e	AT1G27370	SPL10	SBP
AT1G24260	AGL9|SEP3	MADS	MIR156e	AT1G27370	SPL10	SBP
AT5G60910	AGL8|FUL	MADS	MIR156e	AT1G27370	SPL10	SBP
AT1G22640	ATMYB3|MYB3	MYB	MIR156e	AT1G27370	SPL10	SBP
AT5G04760		MYB	MIR156e	AT1G27370	SPL10	SBP
AT5G67300	ATMYB44|ATMYBR1|MYB44|MYBR1	MYB	MIR156e	AT1G27370	SPL10	SBP
AT4G27410	ANAC072|RD26	NAC	MIR156e	AT1G27370	SPL10	SBP
AT1G80840	ATWRKY40|WRKY40	WRKY	MIR156e	AT1G27370	SPL10	SBP
AT2G38470	ATWRKY33|WRKY33	WRKY	MIR156e	AT1G27370	SPL10	SBP
AT4G31800	ATWRKY18|WRKY18	WRKY	MIR156e	AT1G27370	SPL10	SBP
AT2G01760	ARR14|RR14	ARR-B	MIR156f	AT1G27370	SPL10	SBP
AT3G16857	ARR1|RR1	ARR-B	MIR156f	AT1G27370	SPL10	SBP
AT4G31920	ARR10|RR10	ARR-B	MIR156f	AT1G27370	SPL10	SBP
AT5G42520	ATBPC6|BBR/BPC6|BPC6	BBR-BPC	MIR156f	AT1G27370	SPL10	SBP
AT5G04340	C2H2|CZF2|ZAT6	C2H2	MIR156f	AT1G27370	SPL10	SBP
AT5G47640	NF-YB2	CCAAT	MIR156f	AT1G27370	SPL10	SBP
AT2G46680	ATHB-7|ATHB7|HB-7	HB	MIR156f	AT1G27370	SPL10	SBP
AT5G65310	ATHB-5|ATHB5|HB5	HB	MIR156f	AT1G27370	SPL10	SBP
AT5G60910	AGL8|FUL	MADS	MIR156f	AT1G27370	SPL10	SBP
AT1G22640	ATMYB3|MYB3	MYB	MIR156f	AT1G27370	SPL10	SBP
AT5G04760		MYB	MIR156f	AT1G27370	SPL10	SBP
AT5G67300	ATMYB44|ATMYBR1|MYB44|MYBR1	MYB	MIR156f	AT1G27370	SPL10	SBP
AT4G27410	ANAC072|RD26	NAC	MIR156f	AT1G27370	SPL10	SBP
AT4G31920	ARR10|RR10	ARR-B	MIR156g	AT1G27370	SPL10	SBP
AT5G60910	AGL8|FUL	MADS	MIR156g	AT1G27370	SPL10	SBP
AT2G46830	AtCCA1|CCA1	MYB-related	MIR156g	AT1G27370	SPL10	SBP
AT3G11100		Trihelix	MIR156g	AT1G27370	SPL10	SBP
AT2G01760	ARR14|RR14	ARR-B	MIR156h	AT1G27370	SPL10	SBP
AT3G16857	ARR1|RR1	ARR-B	MIR156h	AT1G27370	SPL10	SBP
AT4G31920	ARR10|RR10	ARR-B	MIR156h	AT1G27370	SPL10	SBP
AT1G09530	PAP3|PIF3|POC1	bHLH	MIR156h	AT1G27370	SPL10	SBP
AT5G56860	GATA21|GNC	C2C2-GATA	MIR156h	AT1G27370	SPL10	SBP
AT5G04340	C2H2|CZF2|ZAT6	C2H2	MIR156h	AT1G27370	SPL10	SBP
AT2G01570	RGA|RGA1	GRAS	MIR156h	AT1G27370	SPL10	SBP
AT2G17950	PGA6|WUS|WUS1	HB	MIR156h	AT1G27370	SPL10	SBP
AT2G46680	ATHB-7|ATHB7|HB-7	HB	MIR156h	AT1G27370	SPL10	SBP
AT5G02030	BLH9|BLR|HB-6|LSN|PNY|RPL|VAN	HB	MIR156h	AT1G27370	SPL10	SBP
AT5G16820	ATHSF3|ATHSFA1B|HSF3|HSFA1B	HSF	MIR156h	AT1G27370	SPL10	SBP
AT5G60910	AGL8|FUL	MADS	MIR156h	AT1G27370	SPL10	SBP
AT1G22640	ATMYB3|MYB3	MYB	MIR156h	AT1G27370	SPL10	SBP
AT5G04760		MYB	MIR156h	AT1G27370	SPL10	SBP
AT5G67300	ATMYB44|ATMYBR1|MYB44|MYBR1	MYB	MIR156h	AT1G27370	SPL10	SBP
AT4G27410	ANAC072|RD26	NAC	MIR156h	AT1G27370	SPL10	SBP
AT2G28290	CHR3|SYD	SNF2	MIR156h	AT1G27370	SPL10	SBP
AT2G46020	ATBRM|BRM|CHA2|CHR2	SNF2	MIR156h	AT1G27370	SPL10	SBP
AT3G15030	MEE35|TCP4	TCP	MIR156h	AT1G27370	SPL10	SBP
AT3G11100		Trihelix	MIR156h	AT1G27370	SPL10	SBP
AT4G31270		Trihelix	MIR156h	AT1G27370	SPL10	SBP
AT5G67450	AZF1|ZF1	C2H2	MIR156i	AT1G27370	SPL10	SBP
AT1G24260	AGL9|SEP3	MADS	MIR156i	AT1G27370	SPL10	SBP
AT5G60910	AGL8|FUL	MADS	MIR156i	AT1G27370	SPL10	SBP
AT4G27410	ANAC072|RD26	NAC	MIR156i	AT1G27370	SPL10	SBP
AT2G28290	CHR3|SYD	SNF2	MIR156i	AT1G27370	SPL10	SBP
AT5G67450	AZF1|ZF1	C2H2	MIR156j	AT1G27370	SPL10	SBP
AT5G16560	KAN|KAN1	G2-like	MIR156j	AT1G27370	SPL10	SBP
AT2G46680	ATHB-7|ATHB7|HB-7	HB	MIR156j	AT1G27370	SPL10	SBP
AT5G04760		MYB	MIR156j	AT1G27370	SPL10	SBP
AT3G15030	MEE35|TCP4	TCP	MIR156j	AT1G27370	SPL10	SBP
AT2G01760	ARR14|RR14	ARR-B	MIR157a	AT1G27370	SPL10	SBP
AT3G16857	ARR1|RR1	ARR-B	MIR157a	AT1G27370	SPL10	SBP
AT5G67450	AZF1|ZF1	C2H2	MIR157a	AT1G27370	SPL10	SBP
AT5G16560	KAN|KAN1	G2-like	MIR157a	AT1G27370	SPL10	SBP
AT2G17950	PGA6|WUS|WUS1	HB	MIR157a	AT1G27370	SPL10	SBP
AT5G02030	BLH9|BLR|HB-6|LSN|PNY|RPL|VAN	HB	MIR157a	AT1G27370	SPL10	SBP
AT1G24260	AGL9|SEP3	MADS	MIR157a	AT1G27370	SPL10	SBP
AT5G60910	AGL8|FUL	MADS	MIR157a	AT1G27370	SPL10	SBP
AT5G04760		MYB	MIR157a	AT1G27370	SPL10	SBP
AT1G80840	ATWRKY40|WRKY40	WRKY	MIR157a	AT1G27370	SPL10	SBP
AT2G38470	ATWRKY33|WRKY33	WRKY	MIR157a	AT1G27370	SPL10	SBP
AT4G31800	ATWRKY18|WRKY18	WRKY	MIR157a	AT1G27370	SPL10	SBP
AT5G04340	C2H2|CZF2|ZAT6	C2H2	MIR157b	AT1G27370	SPL10	SBP
AT5G67450	AZF1|ZF1	C2H2	MIR157b	AT1G27370	SPL10	SBP
AT5G47640	NF-YB2	CCAAT	MIR157b	AT1G27370	SPL10	SBP
AT5G16560	KAN|KAN1	G2-like	MIR157b	AT1G27370	SPL10	SBP
AT2G46680	ATHB-7|ATHB7|HB-7	HB	MIR157b	AT1G27370	SPL10	SBP
AT5G02030	BLH9|BLR|HB-6|LSN|PNY|RPL|VAN	HB	MIR157b	AT1G27370	SPL10	SBP
AT5G65310	ATHB-5|ATHB5|HB5	HB	MIR157b	AT1G27370	SPL10	SBP
AT5G60910	AGL8|FUL	MADS	MIR157b	AT1G27370	SPL10	SBP
AT5G04760		MYB	MIR157b	AT1G27370	SPL10	SBP
AT4G27410	ANAC072|RD26	NAC	MIR157b	AT1G27370	SPL10	SBP
AT2G28290	CHR3|SYD	SNF2	MIR157b	AT1G27370	SPL10	SBP
AT1G80840	ATWRKY40|WRKY40	WRKY	MIR157b	AT1G27370	SPL10	SBP
AT2G38470	ATWRKY33|WRKY33	WRKY	MIR157b	AT1G27370	SPL10	SBP
AT4G31800	ATWRKY18|WRKY18	WRKY	MIR157b	AT1G27370	SPL10	SBP
AT2G01760	ARR14|RR14	ARR-B	MIR157c	AT1G27370	SPL10	SBP
AT3G16857	ARR1|RR1	ARR-B	MIR157c	AT1G27370	SPL10	SBP
AT4G31920	ARR10|RR10	ARR-B	MIR157c	AT1G27370	SPL10	SBP
AT5G42520	ATBPC6|BBR/BPC6|BPC6	BBR-BPC	MIR157c	AT1G27370	SPL10	SBP
AT1G09530	PAP3|PIF3|POC1	bHLH	MIR157c	AT1G27370	SPL10	SBP
AT5G53210	SPCH	bHLH	MIR157c	AT1G27370	SPL10	SBP
AT5G56860	GATA21|GNC	C2C2-GATA	MIR157c	AT1G27370	SPL10	SBP
AT5G04340	C2H2|CZF2|ZAT6	C2H2	MIR157c	AT1G27370	SPL10	SBP
AT5G47640	NF-YB2	CCAAT	MIR157c	AT1G27370	SPL10	SBP
AT5G16560	KAN|KAN1	G2-like	MIR157c	AT1G27370	SPL10	SBP
AT2G01570	RGA|RGA1	GRAS	MIR157c	AT1G27370	SPL10	SBP
AT2G46680	ATHB-7|ATHB7|HB-7	HB	MIR157c	AT1G27370	SPL10	SBP
AT5G02030	BLH9|BLR|HB-6|LSN|PNY|RPL|VAN	HB	MIR157c	AT1G27370	SPL10	SBP
AT5G60690	IFL|IFL1|REV	HB	MIR157c	AT1G27370	SPL10	SBP
AT5G65310	ATHB-5|ATHB5|HB5	HB	MIR157c	AT1G27370	SPL10	SBP
AT5G16820	ATHSF3|ATHSFA1B|HSF3|HSFA1B	HSF	MIR157c	AT1G27370	SPL10	SBP
AT1G24260	AGL9|SEP3	MADS	MIR157c	AT1G27370	SPL10	SBP
AT5G60910	AGL8|FUL	MADS	MIR157c	AT1G27370	SPL10	SBP
AT1G22640	ATMYB3|MYB3	MYB	MIR157c	AT1G27370	SPL10	SBP
AT5G04760		MYB	MIR157c	AT1G27370	SPL10	SBP
AT5G67300	ATMYB44|ATMYBR1|MYB44|MYBR1	MYB	MIR157c	AT1G27370	SPL10	SBP
AT3G01460	ATMBD9|MBD9	PHD	MIR157c	AT1G27370	SPL10	SBP
AT2G28290	CHR3|SYD	SNF2	MIR157c	AT1G27370	SPL10	SBP
AT1G80840	ATWRKY40|WRKY40	WRKY	MIR157c	AT1G27370	SPL10	SBP
AT2G38470	ATWRKY33|WRKY33	WRKY	MIR157c	AT1G27370	SPL10	SBP
AT4G31800	ATWRKY18|WRKY18	WRKY	MIR157c	AT1G27370	SPL10	SBP
AT3G16857	ARR1|RR1	ARR-B	MIR157d	AT1G27370	SPL10	SBP
AT4G31920	ARR10|RR10	ARR-B	MIR157d	AT1G27370	SPL10	SBP
AT5G42520	ATBPC6|BBR/BPC6|BPC6	BBR-BPC	MIR157d	AT1G27370	SPL10	SBP
AT1G09530	PAP3|PIF3|POC1	bHLH	MIR157d	AT1G27370	SPL10	SBP
AT5G53210	SPCH	bHLH	MIR157d	AT1G27370	SPL10	SBP
AT5G56860	GATA21|GNC	C2C2-GATA	MIR157d	AT1G27370	SPL10	SBP
AT5G47640	NF-YB2	CCAAT	MIR157d	AT1G27370	SPL10	SBP
AT2G01570	RGA|RGA1	GRAS	MIR157d	AT1G27370	SPL10	SBP
AT2G17950	PGA6|WUS|WUS1	HB	MIR157d	AT1G27370	SPL10	SBP
AT2G46680	ATHB-7|ATHB7|HB-7	HB	MIR157d	AT1G27370	SPL10	SBP
AT5G02030	BLH9|BLR|HB-6|LSN|PNY|RPL|VAN	HB	MIR157d	AT1G27370	SPL10	SBP
AT5G16820	ATHSF3|ATHSFA1B|HSF3|HSFA1B	HSF	MIR157d	AT1G27370	SPL10	SBP
AT1G24260	AGL9|SEP3	MADS	MIR157d	AT1G27370	SPL10	SBP
AT5G60910	AGL8|FUL	MADS	MIR157d	AT1G27370	SPL10	SBP
AT1G22640	ATMYB3|MYB3	MYB	MIR157d	AT1G27370	SPL10	SBP
AT5G04760		MYB	MIR157d	AT1G27370	SPL10	SBP
AT5G67300	ATMYB44|ATMYBR1|MYB44|MYBR1	MYB	MIR157d	AT1G27370	SPL10	SBP
AT4G27410	ANAC072|RD26	NAC	MIR157d	AT1G27370	SPL10	SBP
AT3G01460	ATMBD9|MBD9	PHD	MIR157d	AT1G27370	SPL10	SBP
AT5G24470	APRR5|PRR5	Pseudo ARR-B	MIR157d	AT1G27370	SPL10	SBP
AT2G46020	ATBRM|BRM|CHA2|CHR2	SNF2	MIR157d	AT1G27370	SPL10	SBP
AT3G15030	MEE35|TCP4	TCP	MIR157d	AT1G27370	SPL10	SBP
AT3G11100		Trihelix	MIR157d	AT1G27370	SPL10	SBP
AT1G80840	ATWRKY40|WRKY40	WRKY	MIR157d	AT1G27370	SPL10	SBP
AT2G38470	ATWRKY33|WRKY33	WRKY	MIR157d	AT1G27370	SPL10	SBP
AT4G31800	ATWRKY18|WRKY18	WRKY	MIR157d	AT1G27370	SPL10	SBP
AT5G39760	AtHB23|HB23|ZHD10	zf-HD	MIR157d	AT1G27370	SPL10	SBP
AT5G17430	BBM	AP2-EREBP	MIR5658	AT1G28310		C2C2-Dof
AT2G01760	ARR14|RR14	ARR-B	MIR5658	AT1G28310		C2C2-Dof
AT3G16857	ARR1|RR1	ARR-B	MIR5658	AT1G28310		C2C2-Dof
AT4G31920	ARR10|RR10	ARR-B	MIR5658	AT1G28310		C2C2-Dof
AT1G32640	ATMYC2|JAI1|JIN1|MYC2|RD22BP1|ZBF1	bHLH	MIR5658	AT1G28310		C2C2-Dof
AT2G46270	GBF3	bZIP	MIR5658	AT1G28310		C2C2-Dof
AT4G34000	ABF3|AtABF3|DPBF5	bZIP	MIR5658	AT1G28310		C2C2-Dof
AT5G56860	GATA21|GNC	C2C2-GATA	MIR5658	AT1G28310		C2C2-Dof
AT5G04340	C2H2|CZF2|ZAT6	C2H2	MIR5658	AT1G28310		C2C2-Dof
AT2G17950	PGA6|WUS|WUS1	HB	MIR5658	AT1G28310		C2C2-Dof
AT4G37790	HAT22	HB	MIR5658	AT1G28310		C2C2-Dof
AT5G02030	BLH9|BLR|HB-6|LSN|PNY|RPL|VAN	HB	MIR5658	AT1G28310		C2C2-Dof
AT5G65310	ATHB-5|ATHB5|HB5	HB	MIR5658	AT1G28310		C2C2-Dof
AT5G61850	LFY|LFY3	LFY	MIR5658	AT1G28310		C2C2-Dof
AT1G24260	AGL9|SEP3	MADS	MIR5658	AT1G28310		C2C2-Dof
AT5G60910	AGL8|FUL	MADS	MIR5658	AT1G28310		C2C2-Dof
AT1G22640	ATMYB3|MYB3	MYB	MIR5658	AT1G28310		C2C2-Dof
AT5G67300	ATMYB44|ATMYBR1|MYB44|MYBR1	MYB	MIR5658	AT1G28310		C2C2-Dof
AT4G27410	ANAC072|RD26	NAC	MIR5658	AT1G28310		C2C2-Dof
AT5G24470	APRR5|PRR5	Pseudo ARR-B	MIR5658	AT1G28310		C2C2-Dof
AT2G16390	CHR35|DMS1|DRD1	SNF2	MIR5658	AT1G28310		C2C2-Dof
AT2G28290	CHR3|SYD	SNF2	MIR5658	AT1G28310		C2C2-Dof
AT3G10390	FLD	SWI/SNF-SWI3	MIR5658	AT1G28310		C2C2-Dof
AT3G15030	MEE35|TCP4	TCP	MIR5658	AT1G28310		C2C2-Dof
AT4G31800	ATWRKY18|WRKY18	WRKY	MIR5658	AT1G28310		C2C2-Dof
AT2G46270	GBF3	bZIP	MIR417	AT1G28420	HB-1|RLT1	HB
AT5G47640	NF-YB2	CCAAT	MIR5021	AT1G28420	HB-1|RLT1	HB
AT1G77300	ASHH2|CCR1|EFS|LAZ2|SDG8	SET	MIR5021	AT1G28420	HB-1|RLT1	HB
AT5G04340	C2H2|CZF2|ZAT6	C2H2	MIR5021	AT1G29950		bHLH
AT5G47640	NF-YB2	CCAAT	MIR5021	AT1G29950		bHLH
AT4G37790	HAT22	HB	MIR5021	AT1G29950		bHLH
AT5G65310	ATHB-5|ATHB5|HB5	HB	MIR5021	AT1G29950		bHLH
AT1G77300	ASHH2|CCR1|EFS|LAZ2|SDG8	SET	MIR5021	AT1G29950		bHLH
AT5G47640	NF-YB2	CCAAT	MIR5021	AT1G30810	JMJ18	Jumonji
AT2G46680	ATHB-7|ATHB7|HB-7	HB	MIR5021	AT1G30810	JMJ18	Jumonji
AT1G77300	ASHH2|CCR1|EFS|LAZ2|SDG8	SET	MIR5021	AT1G30810	JMJ18	Jumonji
AT2G28290	CHR3|SYD	SNF2	MIR5021	AT1G30810	JMJ18	Jumonji
AT2G01760	ARR14|RR14	ARR-B	MIR847	AT1G30970	SUF4	C2H2
AT2G46270	GBF3	bZIP	MIR847	AT1G30970	SUF4	C2H2
AT5G47640	NF-YB2	CCAAT	MIR847	AT1G30970	SUF4	C2H2
AT3G10390	FLD	SWI/SNF-SWI3	MIR847	AT1G30970	SUF4	C2H2
AT5G17430	BBM	AP2-EREBP	MIR5658	AT1G32360		C3H
AT2G01760	ARR14|RR14	ARR-B	MIR5658	AT1G32360		C3H
AT3G16857	ARR1|RR1	ARR-B	MIR5658	AT1G32360		C3H
AT4G31920	ARR10|RR10	ARR-B	MIR5658	AT1G32360		C3H
AT1G32640	ATMYC2|JAI1|JIN1|MYC2|RD22BP1|ZBF1	bHLH	MIR5658	AT1G32360		C3H
AT5G46760	MYC3	bHLH	MIR5658	AT1G32360		C3H
AT5G53210	SPCH	bHLH	MIR5658	AT1G32360		C3H
AT4G34000	ABF3|AtABF3|DPBF5	bZIP	MIR5658	AT1G32360		C3H
AT5G11260	HY5|TED	bZIP	MIR5658	AT1G32360		C3H
AT5G56860	GATA21|GNC	C2C2-GATA	MIR5658	AT1G32360		C3H
AT4G35610		C2H2	MIR5658	AT1G32360		C3H
AT5G04340	C2H2|CZF2|ZAT6	C2H2	MIR5658	AT1G32360		C3H
AT5G47640	NF-YB2	CCAAT	MIR5658	AT1G32360		C3H
AT2G36010	ATE2FA|E2F3	E2F-DP	MIR5658	AT1G32360		C3H
AT2G22430	ATHB6|HB6	HB	MIR5658	AT1G32360		C3H
AT4G37790	HAT22	HB	MIR5658	AT1G32360		C3H
AT5G65310	ATHB-5|ATHB5|HB5	HB	MIR5658	AT1G32360		C3H
AT5G16820	ATHSF3|ATHSFA1B|HSF3|HSFA1B	HSF	MIR5658	AT1G32360		C3H
AT5G60910	AGL8|FUL	MADS	MIR5658	AT1G32360		C3H
AT1G22640	ATMYB3|MYB3	MYB	MIR5658	AT1G32360		C3H
AT5G04760		MYB	MIR5658	AT1G32360		C3H
AT5G67300	ATMYB44|ATMYBR1|MYB44|MYBR1	MYB	MIR5658	AT1G32360		C3H
AT4G27410	ANAC072|RD26	NAC	MIR5658	AT1G32360		C3H
AT1G77300	ASHH2|CCR1|EFS|LAZ2|SDG8	SET	MIR5658	AT1G32360		C3H
AT2G46020	ATBRM|BRM|CHA2|CHR2	SNF2	MIR5658	AT1G32360		C3H
AT3G10390	FLD	SWI/SNF-SWI3	MIR5658	AT1G32360		C3H
AT2G38470	ATWRKY33|WRKY33	WRKY	MIR5658	AT1G32360		C3H
AT4G31800	ATWRKY18|WRKY18	WRKY	MIR5658	AT1G32360		C3H
AT2G01760	ARR14|RR14	ARR-B	MIR156h	AT1G32700		PLATZ
AT2G25180	ARR12|RR12	ARR-B	MIR156h	AT1G32700		PLATZ
AT3G16857	ARR1|RR1	ARR-B	MIR156h	AT1G32700		PLATZ
AT4G31920	ARR10|RR10	ARR-B	MIR156h	AT1G32700		PLATZ
AT1G09530	PAP3|PIF3|POC1	bHLH	MIR156h	AT1G32700		PLATZ
AT1G32640	ATMYC2|JAI1|JIN1|MYC2|RD22BP1|ZBF1	bHLH	MIR156h	AT1G32700		PLATZ
AT1G51140	FBH3	bHLH	MIR156h	AT1G32700		PLATZ
AT2G43010	AtPIF4|PIF4|SRL2	bHLH	MIR156h	AT1G32700		PLATZ
AT1G49720	ABF1|AtABF1	bZIP	MIR156h	AT1G32700		PLATZ
AT2G46270	GBF3	bZIP	MIR156h	AT1G32700		PLATZ
AT3G19290	ABF4|AREB2	bZIP	MIR156h	AT1G32700		PLATZ
AT4G01120	ATBZIP54|GBF2	bZIP	MIR156h	AT1G32700		PLATZ
AT4G34000	ABF3|AtABF3|DPBF5	bZIP	MIR156h	AT1G32700		PLATZ
AT5G56860	GATA21|GNC	C2C2-GATA	MIR156h	AT1G32700		PLATZ
AT3G48430	JMJ12|REF6	C2H2	MIR156h	AT1G32700		PLATZ
AT5G04340	C2H2|CZF2|ZAT6	C2H2	MIR156h	AT1G32700		PLATZ
AT1G56170	ATHAP5B|HAP5B|NF-YC2	CCAAT	MIR156h	AT1G32700		PLATZ
AT2G01570	RGA|RGA1	GRAS	MIR156h	AT1G32700		PLATZ
AT2G17950	PGA6|WUS|WUS1	HB	MIR156h	AT1G32700		PLATZ
AT2G22430	ATHB6|HB6	HB	MIR156h	AT1G32700		PLATZ
AT2G46680	ATHB-7|ATHB7|HB-7	HB	MIR156h	AT1G32700		PLATZ
AT4G37790	HAT22	HB	MIR156h	AT1G32700		PLATZ
AT5G02030	BLH9|BLR|HB-6|LSN|PNY|RPL|VAN	HB	MIR156h	AT1G32700		PLATZ
AT5G16820	ATHSF3|ATHSFA1B|HSF3|HSFA1B	HSF	MIR156h	AT1G32700		PLATZ
AT5G43840	AT-HSFA6A|HSFA6A	HSF	MIR156h	AT1G32700		PLATZ
AT5G60910	AGL8|FUL	MADS	MIR156h	AT1G32700		PLATZ
AT1G22640	ATMYB3|MYB3	MYB	MIR156h	AT1G32700		PLATZ
AT5G04760		MYB	MIR156h	AT1G32700		PLATZ
AT5G67300	ATMYB44|ATMYBR1|MYB44|MYBR1	MYB	MIR156h	AT1G32700		PLATZ
AT1G49950	ATTRB1|TRB1	MYB-related	MIR156h	AT1G32700		PLATZ
AT1G77450	anac032|NAC032	NAC	MIR156h	AT1G32700		PLATZ
AT4G27410	ANAC072|RD26	NAC	MIR156h	AT1G32700		PLATZ
AT2G28290	CHR3|SYD	SNF2	MIR156h	AT1G32700		PLATZ
AT2G46020	ATBRM|BRM|CHA2|CHR2	SNF2	MIR156h	AT1G32700		PLATZ
AT3G15030	MEE35|TCP4	TCP	MIR156h	AT1G32700		PLATZ
AT4G14720	PPD2|TIFY4B	Tify	MIR156h	AT1G32700		PLATZ
AT3G11100		Trihelix	MIR156h	AT1G32700		PLATZ
AT4G31270		Trihelix	MIR156h	AT1G32700		PLATZ
AT5G04340	C2H2|CZF2|ZAT6	C2H2	MIR5021	AT1G33240	AT-GTL1|ATGTL1|GTL1	Trihelix
AT5G47640	NF-YB2	CCAAT	MIR5021	AT1G33240	AT-GTL1|ATGTL1|GTL1	Trihelix
AT2G46680	ATHB-7|ATHB7|HB-7	HB	MIR5021	AT1G33240	AT-GTL1|ATGTL1|GTL1	Trihelix
AT4G37790	HAT22	HB	MIR5021	AT1G33240	AT-GTL1|ATGTL1|GTL1	Trihelix
AT5G65310	ATHB-5|ATHB5|HB5	HB	MIR5021	AT1G33240	AT-GTL1|ATGTL1|GTL1	Trihelix
AT1G77300	ASHH2|CCR1|EFS|LAZ2|SDG8	SET	MIR5021	AT1G33240	AT-GTL1|ATGTL1|GTL1	Trihelix
AT2G28290	CHR3|SYD	SNF2	MIR5021	AT1G33240	AT-GTL1|ATGTL1|GTL1	Trihelix
AT3G16857	ARR1|RR1	ARR-B	MIR414	AT1G34190	anac017|NAC017	NAC
AT5G56860	GATA21|GNC	C2C2-GATA	MIR414	AT1G34190	anac017|NAC017	NAC
AT5G47640	NF-YB2	CCAAT	MIR414	AT1G34190	anac017|NAC017	NAC
AT2G46680	ATHB-7|ATHB7|HB-7	HB	MIR414	AT1G34190	anac017|NAC017	NAC
AT4G27410	ANAC072|RD26	NAC	MIR414	AT1G34190	anac017|NAC017	NAC
AT2G25180	ARR12|RR12	ARR-B	MIR414	AT1G49900		C2H2
AT3G16857	ARR1|RR1	ARR-B	MIR414	AT1G49900		C2H2
AT4G34000	ABF3|AtABF3|DPBF5	bZIP	MIR414	AT1G49900		C2H2
AT5G04340	C2H2|CZF2|ZAT6	C2H2	MIR414	AT1G49900		C2H2
AT5G67450	AZF1|ZF1	C2H2	MIR414	AT1G49900		C2H2
AT5G47640	NF-YB2	CCAAT	MIR414	AT1G49900		C2H2
AT2G22430	ATHB6|HB6	HB	MIR414	AT1G49900		C2H2
AT2G46680	ATHB-7|ATHB7|HB-7	HB	MIR414	AT1G49900		C2H2
AT4G37790	HAT22	HB	MIR414	AT1G49900		C2H2
AT5G65310	ATHB-5|ATHB5|HB5	HB	MIR414	AT1G49900		C2H2
AT5G04760		MYB	MIR414	AT1G49900		C2H2
AT5G67300	ATMYB44|ATMYBR1|MYB44|MYBR1	MYB	MIR414	AT1G49900		C2H2
AT1G77450	anac032|NAC032	NAC	MIR414	AT1G49900		C2H2
AT4G27410	ANAC072|RD26	NAC	MIR414	AT1G49900		C2H2
AT5G63790	ANAC102|NAC102	NAC	MIR414	AT1G49900		C2H2
AT4G02020	EZA1|SDG10|SWN	SET	MIR414	AT1G49900		C2H2
AT1G80840	ATWRKY40|WRKY40	WRKY	MIR414	AT1G49900		C2H2
AT2G38470	ATWRKY33|WRKY33	WRKY	MIR414	AT1G49900		C2H2
AT4G31800	ATWRKY18|WRKY18	WRKY	MIR414	AT1G49900		C2H2
AT5G04340	C2H2|CZF2|ZAT6	C2H2	MIR5021	AT1G49900		C2H2
AT5G47640	NF-YB2	CCAAT	MIR5021	AT1G49900		C2H2
AT2G46680	ATHB-7|ATHB7|HB-7	HB	MIR5021	AT1G49900		C2H2
AT4G37790	HAT22	HB	MIR5021	AT1G49900		C2H2
AT5G65310	ATHB-5|ATHB5|HB5	HB	MIR5021	AT1G49900		C2H2
AT2G28290	CHR3|SYD	SNF2	MIR5021	AT1G49900		C2H2
AT5G17430	BBM	AP2-EREBP	MIR165a	AT1G52150	ATHB-15|ATHB15|CNA|ICU4	HB
AT3G16857	ARR1|RR1	ARR-B	MIR165a	AT1G52150	ATHB-15|ATHB15|CNA|ICU4	HB
AT4G34000	ABF3|AtABF3|DPBF5	bZIP	MIR165a	AT1G52150	ATHB-15|ATHB15|CNA|ICU4	HB
AT5G11260	HY5|TED	bZIP	MIR165a	AT1G52150	ATHB-15|ATHB15|CNA|ICU4	HB
AT5G04340	C2H2|CZF2|ZAT6	C2H2	MIR165a	AT1G52150	ATHB-15|ATHB15|CNA|ICU4	HB
AT5G47640	NF-YB2	CCAAT	MIR165a	AT1G52150	ATHB-15|ATHB15|CNA|ICU4	HB
AT4G37790	HAT22	HB	MIR165a	AT1G52150	ATHB-15|ATHB15|CNA|ICU4	HB
AT5G02030	BLH9|BLR|HB-6|LSN|PNY|RPL|VAN	HB	MIR165a	AT1G52150	ATHB-15|ATHB15|CNA|ICU4	HB
AT5G65310	ATHB-5|ATHB5|HB5	HB	MIR165a	AT1G52150	ATHB-15|ATHB15|CNA|ICU4	HB
AT1G24260	AGL9|SEP3	MADS	MIR165a	AT1G52150	ATHB-15|ATHB15|CNA|ICU4	HB
AT5G60910	AGL8|FUL	MADS	MIR165a	AT1G52150	ATHB-15|ATHB15|CNA|ICU4	HB
AT1G22640	ATMYB3|MYB3	MYB	MIR165a	AT1G52150	ATHB-15|ATHB15|CNA|ICU4	HB
AT5G04760		MYB	MIR165a	AT1G52150	ATHB-15|ATHB15|CNA|ICU4	HB
AT5G67300	ATMYB44|ATMYBR1|MYB44|MYBR1	MYB	MIR165a	AT1G52150	ATHB-15|ATHB15|CNA|ICU4	HB
AT4G02020	EZA1|SDG10|SWN	SET	MIR165a	AT1G52150	ATHB-15|ATHB15|CNA|ICU4	HB
AT4G31800	ATWRKY18|WRKY18	WRKY	MIR165a	AT1G52150	ATHB-15|ATHB15|CNA|ICU4	HB
AT5G17430	BBM	AP2-EREBP	MIR165b	AT1G52150	ATHB-15|ATHB15|CNA|ICU4	HB
AT5G04340	C2H2|CZF2|ZAT6	C2H2	MIR165b	AT1G52150	ATHB-15|ATHB15|CNA|ICU4	HB
AT5G47640	NF-YB2	CCAAT	MIR165b	AT1G52150	ATHB-15|ATHB15|CNA|ICU4	HB
AT5G18960	FRS12	FAR1	MIR165b	AT1G52150	ATHB-15|ATHB15|CNA|ICU4	HB
AT4G37790	HAT22	HB	MIR165b	AT1G52150	ATHB-15|ATHB15|CNA|ICU4	HB
AT5G02030	BLH9|BLR|HB-6|LSN|PNY|RPL|VAN	HB	MIR165b	AT1G52150	ATHB-15|ATHB15|CNA|ICU4	HB
AT5G65310	ATHB-5|ATHB5|HB5	HB	MIR165b	AT1G52150	ATHB-15|ATHB15|CNA|ICU4	HB
AT1G24260	AGL9|SEP3	MADS	MIR165b	AT1G52150	ATHB-15|ATHB15|CNA|ICU4	HB
AT5G60910	AGL8|FUL	MADS	MIR165b	AT1G52150	ATHB-15|ATHB15|CNA|ICU4	HB
AT1G22640	ATMYB3|MYB3	MYB	MIR165b	AT1G52150	ATHB-15|ATHB15|CNA|ICU4	HB
AT5G04760		MYB	MIR165b	AT1G52150	ATHB-15|ATHB15|CNA|ICU4	HB
AT4G02020	EZA1|SDG10|SWN	SET	MIR165b	AT1G52150	ATHB-15|ATHB15|CNA|ICU4	HB
AT5G04940	SUVH1	SET	MIR165b	AT1G52150	ATHB-15|ATHB15|CNA|ICU4	HB
AT4G14720	PPD2|TIFY4B	Tify	MIR165b	AT1G52150	ATHB-15|ATHB15|CNA|ICU4	HB
AT4G31800	ATWRKY18|WRKY18	WRKY	MIR165b	AT1G52150	ATHB-15|ATHB15|CNA|ICU4	HB
AT5G17430	BBM	AP2-EREBP	MIR166a	AT1G52150	ATHB-15|ATHB15|CNA|ICU4	HB
AT3G16857	ARR1|RR1	ARR-B	MIR166a	AT1G52150	ATHB-15|ATHB15|CNA|ICU4	HB
AT1G32640	ATMYC2|JAI1|JIN1|MYC2|RD22BP1|ZBF1	bHLH	MIR166a	AT1G52150	ATHB-15|ATHB15|CNA|ICU4	HB
AT5G46760	MYC3	bHLH	MIR166a	AT1G52150	ATHB-15|ATHB15|CNA|ICU4	HB
AT5G67060	HEC1	bHLH	MIR166a	AT1G52150	ATHB-15|ATHB15|CNA|ICU4	HB
AT4G34000	ABF3|AtABF3|DPBF5	bZIP	MIR166a	AT1G52150	ATHB-15|ATHB15|CNA|ICU4	HB
AT5G11260	HY5|TED	bZIP	MIR166a	AT1G52150	ATHB-15|ATHB15|CNA|ICU4	HB
AT5G04340	C2H2|CZF2|ZAT6	C2H2	MIR166a	AT1G52150	ATHB-15|ATHB15|CNA|ICU4	HB
AT5G47640	NF-YB2	CCAAT	MIR166a	AT1G52150	ATHB-15|ATHB15|CNA|ICU4	HB
AT5G18960	FRS12	FAR1	MIR166a	AT1G52150	ATHB-15|ATHB15|CNA|ICU4	HB
AT2G17950	PGA6|WUS|WUS1	HB	MIR166a	AT1G52150	ATHB-15|ATHB15|CNA|ICU4	HB
AT2G22430	ATHB6|HB6	HB	MIR166a	AT1G52150	ATHB-15|ATHB15|CNA|ICU4	HB
AT2G46680	ATHB-7|ATHB7|HB-7	HB	MIR166a	AT1G52150	ATHB-15|ATHB15|CNA|ICU4	HB
AT4G37790	HAT22	HB	MIR166a	AT1G52150	ATHB-15|ATHB15|CNA|ICU4	HB
AT5G60690	IFL|IFL1|REV	HB	MIR166a	AT1G52150	ATHB-15|ATHB15|CNA|ICU4	HB
AT5G65310	ATHB-5|ATHB5|HB5	HB	MIR166a	AT1G52150	ATHB-15|ATHB15|CNA|ICU4	HB
AT5G61850	LFY|LFY3	LFY	MIR166a	AT1G52150	ATHB-15|ATHB15|CNA|ICU4	HB
AT1G24260	AGL9|SEP3	MADS	MIR166a	AT1G52150	ATHB-15|ATHB15|CNA|ICU4	HB
AT5G60910	AGL8|FUL	MADS	MIR166a	AT1G52150	ATHB-15|ATHB15|CNA|ICU4	HB
AT1G22640	ATMYB3|MYB3	MYB	MIR166a	AT1G52150	ATHB-15|ATHB15|CNA|ICU4	HB
AT5G04760		MYB	MIR166a	AT1G52150	ATHB-15|ATHB15|CNA|ICU4	HB
AT5G67300	ATMYB44|ATMYBR1|MYB44|MYBR1	MYB	MIR166a	AT1G52150	ATHB-15|ATHB15|CNA|ICU4	HB
AT1G77450	anac032|NAC032	NAC	MIR166a	AT1G52150	ATHB-15|ATHB15|CNA|ICU4	HB
AT4G27410	ANAC072|RD26	NAC	MIR166a	AT1G52150	ATHB-15|ATHB15|CNA|ICU4	HB
AT5G63790	ANAC102|NAC102	NAC	MIR166a	AT1G52150	ATHB-15|ATHB15|CNA|ICU4	HB
AT4G02020	EZA1|SDG10|SWN	SET	MIR166a	AT1G52150	ATHB-15|ATHB15|CNA|ICU4	HB
AT3G10390	FLD	SWI/SNF-SWI3	MIR166a	AT1G52150	ATHB-15|ATHB15|CNA|ICU4	HB
AT4G14720	PPD2|TIFY4B	Tify	MIR166a	AT1G52150	ATHB-15|ATHB15|CNA|ICU4	HB
AT4G31800	ATWRKY18|WRKY18	WRKY	MIR166a	AT1G52150	ATHB-15|ATHB15|CNA|ICU4	HB
AT5G17430	BBM	AP2-EREBP	MIR166b	AT1G52150	ATHB-15|ATHB15|CNA|ICU4	HB
AT3G16857	ARR1|RR1	ARR-B	MIR166b	AT1G52150	ATHB-15|ATHB15|CNA|ICU4	HB
AT5G67060	HEC1	bHLH	MIR166b	AT1G52150	ATHB-15|ATHB15|CNA|ICU4	HB
AT4G34000	ABF3|AtABF3|DPBF5	bZIP	MIR166b	AT1G52150	ATHB-15|ATHB15|CNA|ICU4	HB
AT5G11260	HY5|TED	bZIP	MIR166b	AT1G52150	ATHB-15|ATHB15|CNA|ICU4	HB
AT5G04340	C2H2|CZF2|ZAT6	C2H2	MIR166b	AT1G52150	ATHB-15|ATHB15|CNA|ICU4	HB
AT5G47640	NF-YB2	CCAAT	MIR166b	AT1G52150	ATHB-15|ATHB15|CNA|ICU4	HB
AT4G37790	HAT22	HB	MIR166b	AT1G52150	ATHB-15|ATHB15|CNA|ICU4	HB
AT5G02030	BLH9|BLR|HB-6|LSN|PNY|RPL|VAN	HB	MIR166b	AT1G52150	ATHB-15|ATHB15|CNA|ICU4	HB
AT5G65310	ATHB-5|ATHB5|HB5	HB	MIR166b	AT1G52150	ATHB-15|ATHB15|CNA|ICU4	HB
AT3G58190	ASL16|LBD29	LBD	MIR166b	AT1G52150	ATHB-15|ATHB15|CNA|ICU4	HB
AT1G24260	AGL9|SEP3	MADS	MIR166b	AT1G52150	ATHB-15|ATHB15|CNA|ICU4	HB
AT5G60910	AGL8|FUL	MADS	MIR166b	AT1G52150	ATHB-15|ATHB15|CNA|ICU4	HB
AT5G04760		MYB	MIR166b	AT1G52150	ATHB-15|ATHB15|CNA|ICU4	HB
AT4G27410	ANAC072|RD26	NAC	MIR166b	AT1G52150	ATHB-15|ATHB15|CNA|ICU4	HB
AT4G02020	EZA1|SDG10|SWN	SET	MIR166b	AT1G52150	ATHB-15|ATHB15|CNA|ICU4	HB
AT3G10390	FLD	SWI/SNF-SWI3	MIR166b	AT1G52150	ATHB-15|ATHB15|CNA|ICU4	HB
AT4G31800	ATWRKY18|WRKY18	WRKY	MIR166b	AT1G52150	ATHB-15|ATHB15|CNA|ICU4	HB
AT5G17430	BBM	AP2-EREBP	MIR166c	AT1G52150	ATHB-15|ATHB15|CNA|ICU4	HB
AT3G16857	ARR1|RR1	ARR-B	MIR166c	AT1G52150	ATHB-15|ATHB15|CNA|ICU4	HB
AT5G67060	HEC1	bHLH	MIR166c	AT1G52150	ATHB-15|ATHB15|CNA|ICU4	HB
AT4G34000	ABF3|AtABF3|DPBF5	bZIP	MIR166c	AT1G52150	ATHB-15|ATHB15|CNA|ICU4	HB
AT5G04340	C2H2|CZF2|ZAT6	C2H2	MIR166c	AT1G52150	ATHB-15|ATHB15|CNA|ICU4	HB
AT5G18960	FRS12	FAR1	MIR166c	AT1G52150	ATHB-15|ATHB15|CNA|ICU4	HB
AT2G22430	ATHB6|HB6	HB	MIR166c	AT1G52150	ATHB-15|ATHB15|CNA|ICU4	HB
AT2G46680	ATHB-7|ATHB7|HB-7	HB	MIR166c	AT1G52150	ATHB-15|ATHB15|CNA|ICU4	HB
AT4G37790	HAT22	HB	MIR166c	AT1G52150	ATHB-15|ATHB15|CNA|ICU4	HB
AT5G02030	BLH9|BLR|HB-6|LSN|PNY|RPL|VAN	HB	MIR166c	AT1G52150	ATHB-15|ATHB15|CNA|ICU4	HB
AT5G65310	ATHB-5|ATHB5|HB5	HB	MIR166c	AT1G52150	ATHB-15|ATHB15|CNA|ICU4	HB
AT1G24260	AGL9|SEP3	MADS	MIR166c	AT1G52150	ATHB-15|ATHB15|CNA|ICU4	HB
AT5G60910	AGL8|FUL	MADS	MIR166c	AT1G52150	ATHB-15|ATHB15|CNA|ICU4	HB
AT1G22640	ATMYB3|MYB3	MYB	MIR166c	AT1G52150	ATHB-15|ATHB15|CNA|ICU4	HB
AT5G04760		MYB	MIR166c	AT1G52150	ATHB-15|ATHB15|CNA|ICU4	HB
AT5G67300	ATMYB44|ATMYBR1|MYB44|MYBR1	MYB	MIR166c	AT1G52150	ATHB-15|ATHB15|CNA|ICU4	HB
AT4G27410	ANAC072|RD26	NAC	MIR166c	AT1G52150	ATHB-15|ATHB15|CNA|ICU4	HB
AT4G31800	ATWRKY18|WRKY18	WRKY	MIR166c	AT1G52150	ATHB-15|ATHB15|CNA|ICU4	HB
AT5G17430	BBM	AP2-EREBP	MIR166d	AT1G52150	ATHB-15|ATHB15|CNA|ICU4	HB
AT3G16857	ARR1|RR1	ARR-B	MIR166d	AT1G52150	ATHB-15|ATHB15|CNA|ICU4	HB
AT5G67060	HEC1	bHLH	MIR166d	AT1G52150	ATHB-15|ATHB15|CNA|ICU4	HB
AT4G34000	ABF3|AtABF3|DPBF5	bZIP	MIR166d	AT1G52150	ATHB-15|ATHB15|CNA|ICU4	HB
AT5G04340	C2H2|CZF2|ZAT6	C2H2	MIR166d	AT1G52150	ATHB-15|ATHB15|CNA|ICU4	HB
AT5G18960	FRS12	FAR1	MIR166d	AT1G52150	ATHB-15|ATHB15|CNA|ICU4	HB
AT2G22430	ATHB6|HB6	HB	MIR166d	AT1G52150	ATHB-15|ATHB15|CNA|ICU4	HB
AT2G46680	ATHB-7|ATHB7|HB-7	HB	MIR166d	AT1G52150	ATHB-15|ATHB15|CNA|ICU4	HB
AT4G37790	HAT22	HB	MIR166d	AT1G52150	ATHB-15|ATHB15|CNA|ICU4	HB
AT5G02030	BLH9|BLR|HB-6|LSN|PNY|RPL|VAN	HB	MIR166d	AT1G52150	ATHB-15|ATHB15|CNA|ICU4	HB
AT5G65310	ATHB-5|ATHB5|HB5	HB	MIR166d	AT1G52150	ATHB-15|ATHB15|CNA|ICU4	HB
AT1G24260	AGL9|SEP3	MADS	MIR166d	AT1G52150	ATHB-15|ATHB15|CNA|ICU4	HB
AT5G60910	AGL8|FUL	MADS	MIR166d	AT1G52150	ATHB-15|ATHB15|CNA|ICU4	HB
AT1G22640	ATMYB3|MYB3	MYB	MIR166d	AT1G52150	ATHB-15|ATHB15|CNA|ICU4	HB
AT5G04760		MYB	MIR166d	AT1G52150	ATHB-15|ATHB15|CNA|ICU4	HB
AT5G67300	ATMYB44|ATMYBR1|MYB44|MYBR1	MYB	MIR166d	AT1G52150	ATHB-15|ATHB15|CNA|ICU4	HB
AT4G27410	ANAC072|RD26	NAC	MIR166d	AT1G52150	ATHB-15|ATHB15|CNA|ICU4	HB
AT4G31800	ATWRKY18|WRKY18	WRKY	MIR166d	AT1G52150	ATHB-15|ATHB15|CNA|ICU4	HB
AT3G16857	ARR1|RR1	ARR-B	MIR166e	AT1G52150	ATHB-15|ATHB15|CNA|ICU4	HB
AT5G67060	HEC1	bHLH	MIR166e	AT1G52150	ATHB-15|ATHB15|CNA|ICU4	HB
AT4G34000	ABF3|AtABF3|DPBF5	bZIP	MIR166e	AT1G52150	ATHB-15|ATHB15|CNA|ICU4	HB
AT5G04340	C2H2|CZF2|ZAT6	C2H2	MIR166e	AT1G52150	ATHB-15|ATHB15|CNA|ICU4	HB
AT5G47640	NF-YB2	CCAAT	MIR166e	AT1G52150	ATHB-15|ATHB15|CNA|ICU4	HB
AT5G18960	FRS12	FAR1	MIR166e	AT1G52150	ATHB-15|ATHB15|CNA|ICU4	HB
AT2G17950	PGA6|WUS|WUS1	HB	MIR166e	AT1G52150	ATHB-15|ATHB15|CNA|ICU4	HB
AT2G22430	ATHB6|HB6	HB	MIR166e	AT1G52150	ATHB-15|ATHB15|CNA|ICU4	HB
AT2G46680	ATHB-7|ATHB7|HB-7	HB	MIR166e	AT1G52150	ATHB-15|ATHB15|CNA|ICU4	HB
AT4G37790	HAT22	HB	MIR166e	AT1G52150	ATHB-15|ATHB15|CNA|ICU4	HB
AT5G60690	IFL|IFL1|REV	HB	MIR166e	AT1G52150	ATHB-15|ATHB15|CNA|ICU4	HB
AT5G65310	ATHB-5|ATHB5|HB5	HB	MIR166e	AT1G52150	ATHB-15|ATHB15|CNA|ICU4	HB
AT1G24260	AGL9|SEP3	MADS	MIR166e	AT1G52150	ATHB-15|ATHB15|CNA|ICU4	HB
AT1G22640	ATMYB3|MYB3	MYB	MIR166e	AT1G52150	ATHB-15|ATHB15|CNA|ICU4	HB
AT5G04760		MYB	MIR166e	AT1G52150	ATHB-15|ATHB15|CNA|ICU4	HB
AT5G67300	ATMYB44|ATMYBR1|MYB44|MYBR1	MYB	MIR166e	AT1G52150	ATHB-15|ATHB15|CNA|ICU4	HB
AT4G02020	EZA1|SDG10|SWN	SET	MIR166e	AT1G52150	ATHB-15|ATHB15|CNA|ICU4	HB
AT4G31800	ATWRKY18|WRKY18	WRKY	MIR166e	AT1G52150	ATHB-15|ATHB15|CNA|ICU4	HB
AT4G14720	PPD2|TIFY4B	Tify	MIR166f	AT1G52150	ATHB-15|ATHB15|CNA|ICU4	HB
AT5G17430	BBM	AP2-EREBP	MIR166g	AT1G52150	ATHB-15|ATHB15|CNA|ICU4	HB
AT3G16857	ARR1|RR1	ARR-B	MIR166g	AT1G52150	ATHB-15|ATHB15|CNA|ICU4	HB
AT4G34000	ABF3|AtABF3|DPBF5	bZIP	MIR166g	AT1G52150	ATHB-15|ATHB15|CNA|ICU4	HB
AT5G11260	HY5|TED	bZIP	MIR166g	AT1G52150	ATHB-15|ATHB15|CNA|ICU4	HB
AT5G04340	C2H2|CZF2|ZAT6	C2H2	MIR166g	AT1G52150	ATHB-15|ATHB15|CNA|ICU4	HB
AT5G47640	NF-YB2	CCAAT	MIR166g	AT1G52150	ATHB-15|ATHB15|CNA|ICU4	HB
AT2G46680	ATHB-7|ATHB7|HB-7	HB	MIR166g	AT1G52150	ATHB-15|ATHB15|CNA|ICU4	HB
AT4G37790	HAT22	HB	MIR166g	AT1G52150	ATHB-15|ATHB15|CNA|ICU4	HB
AT5G02030	BLH9|BLR|HB-6|LSN|PNY|RPL|VAN	HB	MIR166g	AT1G52150	ATHB-15|ATHB15|CNA|ICU4	HB
AT5G65310	ATHB-5|ATHB5|HB5	HB	MIR166g	AT1G52150	ATHB-15|ATHB15|CNA|ICU4	HB
AT1G24260	AGL9|SEP3	MADS	MIR166g	AT1G52150	ATHB-15|ATHB15|CNA|ICU4	HB
AT5G60910	AGL8|FUL	MADS	MIR166g	AT1G52150	ATHB-15|ATHB15|CNA|ICU4	HB
AT5G04760		MYB	MIR166g	AT1G52150	ATHB-15|ATHB15|CNA|ICU4	HB
AT5G67300	ATMYB44|ATMYBR1|MYB44|MYBR1	MYB	MIR166g	AT1G52150	ATHB-15|ATHB15|CNA|ICU4	HB
AT4G27410	ANAC072|RD26	NAC	MIR166g	AT1G52150	ATHB-15|ATHB15|CNA|ICU4	HB
AT5G63790	ANAC102|NAC102	NAC	MIR166g	AT1G52150	ATHB-15|ATHB15|CNA|ICU4	HB
AT4G02020	EZA1|SDG10|SWN	SET	MIR166g	AT1G52150	ATHB-15|ATHB15|CNA|ICU4	HB
AT4G31800	ATWRKY18|WRKY18	WRKY	MIR166g	AT1G52150	ATHB-15|ATHB15|CNA|ICU4	HB
AT5G17430	BBM	AP2-EREBP	MIR319a	AT1G53230	TCP3	TCP
AT3G16857	ARR1|RR1	ARR-B	MIR319a	AT1G53230	TCP3	TCP
AT2G01930	ATBPC1|BBR|BPC1	BBR-BPC	MIR319a	AT1G53230	TCP3	TCP
AT2G43010	AtPIF4|PIF4|SRL2	bHLH	MIR319a	AT1G53230	TCP3	TCP
AT4G34000	ABF3|AtABF3|DPBF5	bZIP	MIR319a	AT1G53230	TCP3	TCP
AT5G47640	NF-YB2	CCAAT	MIR319a	AT1G53230	TCP3	TCP
AT2G46680	ATHB-7|ATHB7|HB-7	HB	MIR319a	AT1G53230	TCP3	TCP
AT4G37790	HAT22	HB	MIR319a	AT1G53230	TCP3	TCP
AT5G02030	BLH9|BLR|HB-6|LSN|PNY|RPL|VAN	HB	MIR319a	AT1G53230	TCP3	TCP
AT5G65310	ATHB-5|ATHB5|HB5	HB	MIR319a	AT1G53230	TCP3	TCP
AT5G61850	LFY|LFY3	LFY	MIR319a	AT1G53230	TCP3	TCP
AT1G24260	AGL9|SEP3	MADS	MIR319a	AT1G53230	TCP3	TCP
AT5G60910	AGL8|FUL	MADS	MIR319a	AT1G53230	TCP3	TCP
AT5G67300	ATMYB44|ATMYBR1|MYB44|MYBR1	MYB	MIR319a	AT1G53230	TCP3	TCP
AT2G28290	CHR3|SYD	SNF2	MIR319a	AT1G53230	TCP3	TCP
AT5G17430	BBM	AP2-EREBP	MIR319b	AT1G53230	TCP3	TCP
AT2G01760	ARR14|RR14	ARR-B	MIR319b	AT1G53230	TCP3	TCP
AT3G16857	ARR1|RR1	ARR-B	MIR319b	AT1G53230	TCP3	TCP
AT2G46270	GBF3	bZIP	MIR319b	AT1G53230	TCP3	TCP
AT4G01120	ATBZIP54|GBF2	bZIP	MIR319b	AT1G53230	TCP3	TCP
AT5G56860	GATA21|GNC	C2C2-GATA	MIR319b	AT1G53230	TCP3	TCP
AT5G02030	BLH9|BLR|HB-6|LSN|PNY|RPL|VAN	HB	MIR319b	AT1G53230	TCP3	TCP
AT1G24260	AGL9|SEP3	MADS	MIR319b	AT1G53230	TCP3	TCP
AT5G60910	AGL8|FUL	MADS	MIR319b	AT1G53230	TCP3	TCP
AT5G17430	BBM	AP2-EREBP	MIR319c	AT1G53230	TCP3	TCP
AT2G46270	GBF3	bZIP	MIR319c	AT1G53230	TCP3	TCP
AT4G01120	ATBZIP54|GBF2	bZIP	MIR319c	AT1G53230	TCP3	TCP
AT4G34000	ABF3|AtABF3|DPBF5	bZIP	MIR319c	AT1G53230	TCP3	TCP
AT5G56860	GATA21|GNC	C2C2-GATA	MIR319c	AT1G53230	TCP3	TCP
AT5G04340	C2H2|CZF2|ZAT6	C2H2	MIR319c	AT1G53230	TCP3	TCP
AT5G47640	NF-YB2	CCAAT	MIR319c	AT1G53230	TCP3	TCP
AT2G46680	ATHB-7|ATHB7|HB-7	HB	MIR319c	AT1G53230	TCP3	TCP
AT4G37790	HAT22	HB	MIR319c	AT1G53230	TCP3	TCP
AT5G65310	ATHB-5|ATHB5|HB5	HB	MIR319c	AT1G53230	TCP3	TCP
AT1G24260	AGL9|SEP3	MADS	MIR319c	AT1G53230	TCP3	TCP
AT5G60910	AGL8|FUL	MADS	MIR319c	AT1G53230	TCP3	TCP
AT1G22640	ATMYB3|MYB3	MYB	MIR319c	AT1G53230	TCP3	TCP
AT5G04760		MYB	MIR319c	AT1G53230	TCP3	TCP
AT5G04340	C2H2|CZF2|ZAT6	C2H2	MIR5021	AT1G53230	TCP3	TCP
AT5G47640	NF-YB2	CCAAT	MIR5021	AT1G53230	TCP3	TCP
AT2G46680	ATHB-7|ATHB7|HB-7	HB	MIR5021	AT1G53230	TCP3	TCP
AT4G37790	HAT22	HB	MIR5021	AT1G53230	TCP3	TCP
AT5G65310	ATHB-5|ATHB5|HB5	HB	MIR5021	AT1G53230	TCP3	TCP
AT1G77300	ASHH2|CCR1|EFS|LAZ2|SDG8	SET	MIR5021	AT1G53230	TCP3	TCP
AT2G28290	CHR3|SYD	SNF2	MIR5021	AT1G53230	TCP3	TCP
AT5G17430	BBM	AP2-EREBP	MIR5658	AT1G53230	TCP3	TCP
AT2G01760	ARR14|RR14	ARR-B	MIR5658	AT1G53230	TCP3	TCP
AT3G16857	ARR1|RR1	ARR-B	MIR5658	AT1G53230	TCP3	TCP
AT4G31920	ARR10|RR10	ARR-B	MIR5658	AT1G53230	TCP3	TCP
AT2G43010	AtPIF4|PIF4|SRL2	bHLH	MIR5658	AT1G53230	TCP3	TCP
AT5G53210	SPCH	bHLH	MIR5658	AT1G53230	TCP3	TCP
AT5G67060	HEC1	bHLH	MIR5658	AT1G53230	TCP3	TCP
AT2G46270	GBF3	bZIP	MIR5658	AT1G53230	TCP3	TCP
AT4G01120	ATBZIP54|GBF2	bZIP	MIR5658	AT1G53230	TCP3	TCP
AT4G34000	ABF3|AtABF3|DPBF5	bZIP	MIR5658	AT1G53230	TCP3	TCP
AT5G56860	GATA21|GNC	C2C2-GATA	MIR5658	AT1G53230	TCP3	TCP
AT3G48430	JMJ12|REF6	C2H2	MIR5658	AT1G53230	TCP3	TCP
AT4G35610		C2H2	MIR5658	AT1G53230	TCP3	TCP
AT5G04340	C2H2|CZF2|ZAT6	C2H2	MIR5658	AT1G53230	TCP3	TCP
AT5G47640	NF-YB2	CCAAT	MIR5658	AT1G53230	TCP3	TCP
AT2G36010	ATE2FA|E2F3	E2F-DP	MIR5658	AT1G53230	TCP3	TCP
AT2G17950	PGA6|WUS|WUS1	HB	MIR5658	AT1G53230	TCP3	TCP
AT2G46680	ATHB-7|ATHB7|HB-7	HB	MIR5658	AT1G53230	TCP3	TCP
AT4G37790	HAT22	HB	MIR5658	AT1G53230	TCP3	TCP
AT5G02030	BLH9|BLR|HB-6|LSN|PNY|RPL|VAN	HB	MIR5658	AT1G53230	TCP3	TCP
AT5G65310	ATHB-5|ATHB5|HB5	HB	MIR5658	AT1G53230	TCP3	TCP
AT5G16820	ATHSF3|ATHSFA1B|HSF3|HSFA1B	HSF	MIR5658	AT1G53230	TCP3	TCP
AT5G61850	LFY|LFY3	LFY	MIR5658	AT1G53230	TCP3	TCP
AT1G24260	AGL9|SEP3	MADS	MIR5658	AT1G53230	TCP3	TCP
AT5G60910	AGL8|FUL	MADS	MIR5658	AT1G53230	TCP3	TCP
AT1G22640	ATMYB3|MYB3	MYB	MIR5658	AT1G53230	TCP3	TCP
AT5G04760		MYB	MIR5658	AT1G53230	TCP3	TCP
AT5G67300	ATMYB44|ATMYBR1|MYB44|MYBR1	MYB	MIR5658	AT1G53230	TCP3	TCP
AT1G77450	anac032|NAC032	NAC	MIR5658	AT1G53230	TCP3	TCP
AT4G27410	ANAC072|RD26	NAC	MIR5658	AT1G53230	TCP3	TCP
AT5G63790	ANAC102|NAC102	NAC	MIR5658	AT1G53230	TCP3	TCP
AT1G77300	ASHH2|CCR1|EFS|LAZ2|SDG8	SET	MIR5658	AT1G53230	TCP3	TCP
AT2G28290	CHR3|SYD	SNF2	MIR5658	AT1G53230	TCP3	TCP
AT2G46020	ATBRM|BRM|CHA2|CHR2	SNF2	MIR5658	AT1G53230	TCP3	TCP
AT3G10390	FLD	SWI/SNF-SWI3	MIR5658	AT1G53230	TCP3	TCP
AT3G11100		Trihelix	MIR5658	AT1G53230	TCP3	TCP
AT1G80840	ATWRKY40|WRKY40	WRKY	MIR5658	AT1G53230	TCP3	TCP
AT2G38470	ATWRKY33|WRKY33	WRKY	MIR5658	AT1G53230	TCP3	TCP
AT4G31800	ATWRKY18|WRKY18	WRKY	MIR5658	AT1G53230	TCP3	TCP
AT3G16857	ARR1|RR1	ARR-B	MIR158a	AT1G64100		NAC
AT5G53210	SPCH	bHLH	MIR158a	AT1G64100		NAC
AT2G46270	GBF3	bZIP	MIR158a	AT1G64100		NAC
AT3G48430	JMJ12|REF6	C2H2	MIR158a	AT1G64100		NAC
AT5G47640	NF-YB2	CCAAT	MIR158a	AT1G64100		NAC
AT2G46680	ATHB-7|ATHB7|HB-7	HB	MIR158a	AT1G64100		NAC
AT4G37790	HAT22	HB	MIR158a	AT1G64100		NAC
AT5G65310	ATHB-5|ATHB5|HB5	HB	MIR158a	AT1G64100		NAC
[truncated: 11,633 more rows]

## Sheet: Table S4
Supplementary Table 4: Open chromatin datasets used for enhancer prediction.
Sample ID	Tissue	Project ID	Pubmed ID	NSC	RSC	QT	FRIP	SPOT
SRX2000803	﻿root	SRP080945	27903897	1.19422	0	NA	0.39196	0.5905
SRX2000804	root	SRP080945	27903897	1.33079	3.41262	2	0.38251	0.6
SRX5036313	root	SRP169954	30598689	1.19097	1.65802	2	0.19454	0.4108
SRX5036315	root	SRP169954	30598689	1.19081	1.88492	2	0.21706	0.4396
SRX5036314	root	SRP169954	30598689	1.32722	2.76778	2	0.31109	0.5243
SRX3348146	root	SRP120499	30420712	1.28982	2.11343	2	0.35492	0.5532
SRX3348141	root	SRP120499	30420712	1.31322	1.17008	1	0.37179	0.5108
SRX3348142	root	SRP120499	30420712	1.24328	1.2465	1	0.32938	0.4827
SRX3348147	root	SRP120499	30420712	1.48055	1.35433	1	0.51332	0.632
SRX3348150	root	SRP120499	30420712	1.31218	1.61073	2	0.41618	0.6023
SRX3348152	root	SRP120499	30420712	1.29229	2.70188	2	0.3887	0.5872
SRX3348145	root	SRP120499	30420712	1.32036	2.34468	2	0.39017	0.5508
SRX3348149	root	SRP120499	30420712	1.33551	2.21486	2	0.42343	0.6111
SRX1096551	root	SRP034156	31798605	1.60554	1.70298	2	0.41544	0.6287
SRX391990	root	SRP034156	31798605	1.51501	1.50687	2	0.48094	0.5991
SRX3006646	root hair	SRP111984	29229750	1.71175	1.2549	1	0.37817	0.4764
SRX3006647	root hair	SRP111984	29229750	1.68698	1.23392	1	0.35373	0.5164
SRX1098137	root hair	SRP034156	31798605	1.24789	0.275941	-1	0.42554	0.5391
SRX1098138	root hair	SRP034156	31798605	1.70915	1.73281	2	0.45042	0.6307
SRX391992	root hair	SRP034156	31798605	1.81292	1.33651	1	0.50392	0.6234
SRX3006644	root non-hair	SRP111984	29229750	2.0128	1.28272	1	0.46342	0.563
SRX3006645	root non-hair	SRP111984	29229750	1.5845	1.26309	1	0.30845	0.4777
SRX391991	root non-hair	SRP034156	31798605	1.52372	1.27168	1	0.42149	0.5015
SRX1096548	root non-hair	SRP034156	31798605	1.70133	1.04267	1	0.52354	0.5682
SRX1096549	root non-hair	SRP034156	31798605	1.7328	1.10094	1	0.43849	0.5387
SRX1096550	root non-hair	SRP034156	31798605	1.6656	1.07315	1	0.43269	0.5466
SRX3348137	shoot	SRP120499	30420712	1.25764	1.27804	1	0.35853	0.5024
SRX3348139	shoot	SRP120499	30420712	1.33765	1.61325	2	0.44887	0.6113
SRX2000807	seedling	SRP080945	27903897	1.42672	4.06168	2	0.55674	0.6273
SRX2000799	seedling	SRP080945	27903897	1.40745	4.7684	2	0.54357	0.644
SRX2000801	seedling	SRP080945	27903897	1.32324	4.50857	2	0.43202	0.6473
SRX2000806	seedling	SRP080945	27903897	1.41441	2.14229	2	0.52457	0.6247
SRX3041699	seedling	SRP113667	29513366	1.46288	1.4099	1	0.52338	0.6207
SRX3041697	seedling	SRP113667	29513366	1.51657	1.38412	1	0.5252	0.6314
SRX3041698	seedling	SRP113667	29513366	1.55378	1.45571	1	0.54459	0.6325
SRX2000805	seedling	SRP080945	27903897	1.39113	11.1724	2	0.36183	0.5978
SRX2000808	seedling	SRP080945	27903897	1.20193	4.32578	2	0.32566	0.4622
SRX2000800	seedling	SRP080945	27903897	1.20389	0	NA	0.36177	0.5387
SRX2000802	seedling	SRP080945	27903897	1.19586	3.84926	2	0.30915	0.5792
SRX3041700	leaf	SRP113667	29513366	1.38781	1.30926	1	0.5091	0.6508
SRX3041701	leaf	SRP113667	29513366	1.57671	1.3194	1	0.53587	0.6644
SRX3041702	leaf	SRP113667	29513366	1.43007	1.33453	1	0.52216	0.6704
SRX391993	seed coat	SRP034156	31798605	1.46078	1.12237	1	0.46025	0.6171
SRX391994	seed coat	SRP034156	31798605	1.51022	1.2391	1	0.50753	0.6184
SRX1098135	seed coat	SRP034156	31798605	1.72608	1.08693	1	0.48936	0.657
SRX1098136	seed coat	SRP034156	31798605	1.51071	1.04586	1	0.46949	0.6382
SRX391995	seed coat	SRP034156	31798605	1.16024	0.651157	0	0.32171	0.5507
SRX1098134	seed coat	SRP034156	31798605	1.27766	0.609099	0	0.29014	0.5471
SRX3040869	seed	SRP113642	31798605	1.51389	1.24177	1	0.50939	0.6172
SRX3040867	seed	SRP113642	31798605	1.58485	1.31913	1	0.49082	0.6477
SRX3040868	seed	SRP113642	31798605	1.8782	1.35542	1	0.43263	0.6612
SRX3040866	seed	SRP113642	31798605	1.19848	1.09677	1	0.34211	0.5553
SRX3040870	seed	SRP113642	31798605	1.3964	1.29701	1	0.29524	0.5815
SRX277582	inflorescences	SRP022587	24581456	1.12732	1.01389	1	0.26791	0.4347
SRX277581	inflorescences	SRP022587	24581456	1.04033	0.408507	-1	0.18817	0.529
SRX277579	inflorescences	SRP022587	24581456	1.04611	0.359184	-1	0.2228	0.4435
SRX277580	inflorescences	SRP022587	24581456	1.12169	1.12698	1	0.1856	0.4805
SRX111007	flower	SRP009678	22773751	1.70684	0.899735	0	0.32581	0.3951
SRX111008	flower	SRP009678	22773751	2.02639	0.99524	0	0.35477	0.4107
SRX391996	flower	SRP034156	31798605	1.19596	0.690769	0	0.32247	0.4621
SRX391997	flower	SRP034156	31798605	1.35049	0.53617	0	0.28768	0.5321
SRX277583	control	SRP022587	24581456	1.06154	0.172467	-2	0.12258	0.2063
SRX3006648	control	SRP111984	29229750	1.31184	1.27381	1	0.08035	0.1666
SRX2000810	control	SRP080945	27903897	1.09796	1.19583	1	0.10593	0.2259
SRX2000809	control	SRP080945	27903897	1.08266	0.769052	0	0.09961	0.1917

## Sheet: Table S5
Supplementary Table 5: Quantitative analysis of promoters and enhancers.
Chrom	Start	End	Category	JSD score	SRX2000803	SRX2000804	SRX5036313	SRX5036315	SRX5036314	SRX3348146	SRX3348141	SRX3348142	SRX3348147	SRX3348150	SRX3348152	SRX3348145	SRX3348149	SRX1096551	SRX391990	SRX3006646	SRX3006647	SRX1098137	SRX1098138	SRX391992	SRX3006644	SRX3006645	SRX391991	SRX1096548	SRX1096549	SRX1096550	SRX3348137	SRX3348139	SRX2000807	SRX2000799	SRX2000801	SRX2000806	SRX3041699	SRX3041697	SRX3041698	SRX2000805	SRX2000808	SRX2000800	SRX2000802	SRX3041700	SRX3041701	SRX3041702	SRX391993	SRX391994	SRX1098135
Chr1	1190	1993	enhancer	0.281692	310.938	238.58	250.932	259.383	206.531	293.907	224.988	290.802	250.148	351.722	355.728	345.179	319.364	641.099	435.617	219.914	200.204	438.58	694.025	566.84	318.537	265.84	913.716	534.611	618.889	319.099	189.247	240.321	184.679	194.704	115.716	220.494	194.031	261.728	237.877	125.037	124.765	182.136	237.79	205.84	214.852	194.975	293.173	293.519	243.13
Chr1	2197	3754	promoter	0.155654	1279.41	460.444	1353.84	1291.62	904.123	1476.16	975.981	1298.64	1341.78	1378.44	1105.01	1237.51	1133.32	1389.83	1585.83	726.086	800.568	1105.15	1316.39	1160.25	979.864	608.321	1582.72	1218.78	1408.78	1390.91	895.667	923.062	816.426	626.846	601.914	718.327	744.562	846.846	872.593	833.79	463.235	895.29	588.679	612.586	565.537	617.519	1145.52	1091.91	1186.47
Chr1	8031	9054	promoter	0.23356	336.852	243.84	493.957	543.253	306.407	507.543	440.605	380.654	501.463	454.71	456.426	465.852	341.975	720.543	650.222	417.296	425.562	832.086	645.401	667.469	644.037	423.877	492.16	607.272	544.914	515.568	459.994	522.272	305.63	250.593	228.735	433.537	465.852	538.84	456.426	464.173	208.778	297.506	205.383	448.63	504.802	492.593	937.765	1069.75	974.235
Chr1	10877	11591	enhancer	0.296482	40.642	58.5802	67.8519	93.0123	101.772	87.1852	85.1914	99.1173	110.377	101.562	119.691	122.296	85	238.704	158.84	45.4136	43.4938	76.1235	230.852	70.0494	62.8642	62.9259	119.333	114.765	88.9383	98.7654	142.185	141.556	45.1728	35.8148	52.0123	87.0864	50.0741	72.4691	51	149.901	49.7716	65.9568	99.9815	112.173	113.735	99.7407	108.969	110.123	173.278
Chr1	13348	14165	promoter	0.279795	309.938	189.889	294.481	222.963	161.259	296.407	208.716	239.136	259.877	280.753	288.58	309.025	202.599	524.025	455.901	143.068	118.358	260.167	401.222	290.914	224.395	132.049	432.407	387.062	324.136	304.728	397.031	485.605	202.444	146.358	175.327	216.074	318.506	290.914	276.778	283.284	173.173	316.259	385.556	426.191	504.802	494.642	260.321	268.84	288.043
Chr1	14652	15795	enhancer	0.241112	496.444	195.253	471.444	443.222	341.142	399.654	299.29	315.383	417.235	442.136	469.426	443.667	302.741	1364.49	1280.25	134.765	128.062	983.728	1134.77	1210.19	305.728	202.062	1191.14	1247.99	1131.15	885.926	305.704	290.432	224.179	142.321	133.963	240.383	190.642	223.309	230.901	176.938	190.556	244.16	184.716	208.969	207.679	263.827	664.29	557.815	630.333
Chr1	16423	16936	enhancer	0.284303	72.2469	26.8889	125.512	114.864	68.642	136.395	104.691	121.5	130.58	141.21	161.296	145.525	117.272	144.543	144.247	74.6173	70.284	76.1235	113.42	81.1111	108.235	65.3333	83.5864	98.4444	85.1728	72.0123	304.716	383.765	168.358	111.37	125.963	171.728	319.272	275.296	246.815	395.198	90.4938	129.099	125.716	499.568	506.204	458.512	424.815	395.099	422.34
Chr1	19366	19583	enhancer	0.301042	82.9753	69.5802	18.2716	44.8272	24.5617	63.858	72.7037	90.5062	105.667	104.407	76.7901	62.4568	69.642	190.327	207.84	43.358	45.6667	232.475	296.574	215.42	88.6914	53.3827	156.438	177.346	85.1728	136.765	71.284	100.173	72.4444	41.7284	48.4444	41.1728	63.2469	57.0988	67.9877	36.3951	33.8395	76.821	76.2716	34.7778	34.0679	44.4198	71.8765	76.6358	114.414
Chr1	19989	21816	enhancer	0.220865	1539.79	852.963	1295.51	1423.06	1103.52	1839.58	1474.93	1500.67	1769.73	1635.74	1358.47	1574.84	1474.72	1508.31	1745.55	1478.56	1604.6	2448.9	1419.2	1635.27	2202.78	1210.07	1376.4	1550.16	1672.88	1878.65	2194.67	2861.96	2116.6	1482.08	1411.26	1974.28	2153.67	2345.05	2195.26	2959.06	1320.41	2011.4	1555.9	2393.34	2207.91	2121.14	2320.64	2406.78	2143.77
Chr1	22400	23454	promoter	0.269564	407.34	108.173	406.16	323.21	297.111	350.395	279.809	321.383	345.568	355.235	388.809	334.049	346.827	506.37	550.278	227.63	236.963	394.296	370.42	371.383	236.383	168.71	438.654	398.728	404.012	463.617	337.278	433.29	296.469	260.506	273.994	322.222	283.914	280.975	316.802	309.907	190.556	387.296	224.988	208.969	274.111	315.136	708.111	565.451	842.284
Chr1	32838	34103	promoter	0.131985	787.593	562.975	918.969	926.741	975.765	776.198	663.679	758.833	796.951	780.543	813.79	774.148	683.667	1061.58	989.926	808.543	777.438	1298.47	977.969	974.037	1085.91	673.543	1036.09	1014.77	817.963	798.16	552.537	613.71	1335.4	973.759	944.5	847.586	856.309	996.074	964.42	1607.27	620.506	687.716	414.346	827.543	893.815	874.605	1259.32	1262.32	1448.74
Chr1	37610	38737	promoter	0.19461	1306.38	1204.98	1441.22	1583.27	1215.04	1177.98	1242.43	1136.44	1229.32	1239.99	1026.96	1098.86	1029.19	1248.67	1524.32	2241.51	2139.9	1631.22	1519.13	1422.12	3356.85	1789.79	2206.72	1919.84	2126.95	1965.67	775.08	1079.69	2033.05	1522.88	1601.42	1681.14	2026.88	2335.59	2083.32	4404.09	831.444	977.914	1035.15	2448.9	2194.09	1977.72	2137.85	2316.14	2015.79
Chr1	39748	40640	promoter	0.287765	606.543	323.815	609.395	627.031	540.012	352.198	300.358	371.173	534.889	441.136	379.58	513.111	421.284	688.704	807.765	383.864	427.704	562.914	478.586	514.815	365.605	193.457	686.556	565.37	550.049	446.556	143.148	163	263.123	205.346	170.765	193.346	129.802	146.333	99.2654	266.167	166.136	240.617	273.136	54.3765	96.5679	71.4198	185.815	157.173	162.506
Chr1	41880	42124	enhancer	0.305085	92.6728	36.7531	88.7778	59.7407	93.0432	58.2593	55.4815	51.4012	108.988	97.858	73.5432	54.784	82.3827	129.056	150.16	60.3395	70.284	62.8025	113.42	102.679	57.6914	38.5556	116.358	93.8642	137.833	116.074	43.5802	50.2099	50.7778	56.3333	68.821	66.2222	43.7222	48.6173	32.8148	55.321	22.4198	60.9136	43.4938	30.5926	40.8395	40.0864	77.3827	67.963	32.7778
Chr1	44135	45360	promoter	0.240269	720.667	416.457	909.37	888.623	726.235	986.284	645.358	685.21	998.951	938.568	746.981	838.642	708.611	864.753	993.642	581.667	639.148	774.605	534.247	638.247	691.512	447.469	774.481	711.691	796.086	716.611	520.531	577.272	310.938	244.932	379.901	363.37	332.111	317.278	316.802	456.809	246.117	471.346	302.247	325.37	352.951	315.136	602.093	625.611	622.975
Chr1	46560	47245	promoter	0.283973	393.481	260.617	419.481	357.877	282.401	424.691	329.765	342.932	444.636	388.636	386.346	422.778	385.105	365.062	413.648	229.704	230.395	361.216	436.938	311.864	327.556	182.136	553.914	431.747	639.92	531	288.043	391.111	361.809	282.531	373	354.852	292.222	323.531	323.802	657.012	231.58	249.994	141.173	334.123	387.315	352.284	526.204	494.42	403.975
Chr1	48302	48516	promoter	0.305085	33.358	40.2099	77.3827	104.457	59.4815	60.7901	71.3704	52.0494	79.7716	71.0309	58.0247	50.9136	58.0494	74.679	82.3333	86.8765	107.981	103.821	113.42	81.1111	138.988	97.1235	122.852	89.179	145.889	76.4568	58.2593	48.2716	39.7901	28.2593	59.8827	68.8889	68.5556	77.8395	74.5679	114.543	33.8395	29.5494	28.1975	147.074	113.735	106.636	82.7407	102.309	162.506
Chr1	49389	50346	promoter	0.273596	536.5	293.938	511.586	454.136	386.654	747.691	462.253	507.506	667.444	635.086	551.556	728.741	525.716	699.154	809.13	237.556	236.963	361.216	512.716	512.37	288.796	168.71	683.296	541.438	582.148	488.852	472.926	588.506	465.704	376.802	296.049	296.235	379.444	394.321	439.802	559.864	318.92	465.34	576.173	316.321	356.296	287.969	724.895	651.21	738.093
Chr1	50954	52328	promoter	0.163133	1199.56	754.148	1107.86	1166.11	907.469	1368.49	1075.02	1158.27	1445.64	1265.77	1223.73	1222.49	1131.81	1571.33	1689.04	721.827	689.16	1447.67	1432.52	1380.04	1075.27	580.846	1466.43	1371.22	1643.82	1689.74	1252.51	1398.25	1502.4	1184.2	1181.79	1090.96	1035.92	1151.32	1138.05	1569.17	846.407	1398.59	816.16	900.605	1007.13	824.605	1292.27	1341.09	1283.83
Chr1	53944	54160	enhancer	0.304241	30.8395	58.5802	139.117	132.784	41.4938	128.235	92	67.9012	76.9506	91.4506	97.037	94.6914	80.9506	74.679	72.6173	132.259	133.309	89.8025	135.667	49.7654	284.167	137.284	97.1605	73.8519	121.093	67.5926	72.2654	88.6296	53.3827	28.2593	32.284	123.284	122.802	98.7654	104.377	158.704	31.2469	31.7654	22.1235	164.673	198.438	162.765	77.3827	76.9506	101.21
Chr1	54877	55830	enhancer	0.152261	759.358	669.864	915.321	1003.8	833.222	1034.65	1032.78	943.111	1090.81	1008.81	792.827	962.117	787.63	1631.47	1423.66	1349.9	1349.49	2459.24	1390.02	1585.43	2239.33	1133.86	1428.49	1487.91	1550.16	1403.53	954.451	1214.86	1198.3	867.321	815.802	1076.46	1599.27	1615.65	1521.78	2404.83	492.099	689.469	681.272	1722.42	1572.78	1444.59	1851.04	1994.53	1981.08
Chr1	56571	57823	promoter	0.156654	1574.96	1065.22	1346.75	1284.79	1014.8	1691.77	1726.4	1526.28	2028.35	1944.32	1764.23	1669.25	1613.53	1646.43	2053.35	1013.75	952.247	2036.68	2079.7	2026.88	1683.66	1287.41	2356.06	2228.81	2604.32	2152.3	1477.7	1811.51	1552.02	1324.95	1486.77	867.531	1549.7	1637.7	1634.27	2099.5	1117.22	1491.57	878.728	958.457	898.58	908.593	942.642	946.259	1048.07
Chr1	58398	58735	promoter	0.281577	299.79	202.037	204.364	222.963	143.123	303.512	363.895	270.333	414.802	368.309	244.864	237.315	337.012	206.642	138.08	338.611	324.753	218.272	250.025	225.846	574.401	257.444	333.012	321.821	451.444	463.617	218.049	248.259	181.704	154.198	158.377	178.296	300.753	269.741	210	675.383	202.309	169.154	108.099	339.642	275.994	243.784	215.407	260.321	193.679
Chr1	59243	61872	enhancer	0.240618	998.636	533.66	1396.65	1280.46	1186.2	1154.23	1401.72	1148.11	1356.64	1307.33	1365.16	1135.15	1065.95	1559.38	1713.14	522.691	593.185	949.062	1357.46	1079.31	788.951	545.377	1714.72	1154.69	1305.22	1439.96	1795.44	2234.59	1389.83	1066.18	1083.42	968.407	1108.33	1410.78	1390.12	1542.42	868.105	1489.6	922.321	1004.15	969.444	940.148	4565.55	4201.72	4886.7
Chr1	62409	63334	promoter	0.295633	207.185	154.87	337.111	316.951	265.444	173.099	209.864	221.852	193.556	277.08	214.895	198	195.778	254.877	415.654	137.988	178.759	232.475	250.025	269.117	236.383	151.247	495.444	278.759	174.333	242.802	205.506	277.679	250.531	201.123	219.951	231.605	337.494	373.432	345.932	506.235	152.963	211.975	238.383	139.691	205.654	200.432	679.364	682.617	842.284
Chr1	63713	64560	promoter	0.278782	224.827	159.741	319.259	311.58	255.71	348.889	299.605	243.975	307.062	377.074	254.494	310.383	287.932	230.753	250.951	210.79	200.204	260.167	258.969	194.438	274.741	174.216	373.728	285.302	263.716	308.247	770.432	882.852	474.833	364.815	350.673	301.519	894.068	944.543	818.63	977.395	318.173	520.914	370.395	651.21	732.198	642.79	488.963	446.302	386.315
Chr1	67315	69484	enhancer	0.139098	1525.02	968.605	1269.73	1222.74	1129.28	1724.47	1445.73	1496.21	1873.6	1643.72	1524.56	1603.38	1431.93	1881.17	2345.05	789.827	800.568	1716.9	2014.54	1957.54	1066.32	796.556	2458.98	2219.25	2640.03	2641.06	2018.07	2357.43	2100.67	1578.8	1696.5	1927.61	2015.57	2078.96	2128.59	2662.14	1231.31	2064.07	1607.27	1453.14	1404.09	1236.25	2143.77	1988.41	2100.09
Chr1	71982	72664	promoter	0.225969	298.235	268.21	301.296	407.611	353.272	469.025	378.586	388.901	447.228	461.42	429.728	387.21	356.543	635.765	643.481	506.086	470.488	974.901	676.272	718.84	743.253	449.846	634.698	645.593	639.92	622.636	456.556	458.574	519.259	317.5	396.049	478.864	557.481	614.346	652.512	1323.6	214.321	341.407	294.747	576.494	563.185	543.84	957.086	983.309	1101.1
Chr1	74491	76691	promoter	0.205801	992.519	651.642	831.025	908.691	583.963	1223.28	1227.87	1017.63	1194.65	1069.98	1198.99	1185.56	1356.91	1028.11	1242.43	789.827	655.66	1028.31	1081.01	1064.85	956.438	763.185	1560.4	1335.98	1589.16	1692.96	1475.11	1283.91	1029.11	838.284	741.877	843.593	1020.91	1077.57	1013.75	1604.34	831.444	1250.01	1049.31	802.975	683.914	756.13	1316.86	1209.78	1121.31
Chr1	77408	78054	enhancer	0.252186	254.728	228.815	231.605	316.951	270.333	338.846	303.414	274.895	356.716	361.241	330.444	340.852	292.123	726	641.574	280.37	302.086	664.025	526.574	774.185	414.673	293.488	631.951	717.019	629.444	611.593	259.031	336.784	405.562	276.605	273.994	340.494	414.265	471.383	393.049	574.698	210.704	207.29	262.265	251.556	258.741	306.253	708.111	719.907	895.247
Chr1	79319	80040	enhancer	0.27444	288.309	115.605	219.735	246.086	283.475	333.611	237.889	263.58	385.716	309.704	355.728	385.204	245.204	731.506	626.556	66.858	51.5309	394.296	190.957	299.037	104.21	101.864	300.21	233.198	282.444	253.525	200.198	228.63	201.938	156.562	194.525	151.506	144.247	109.815	162.321	204.031	109.074	214.951	211.333	61.5432	70.858	55.7901	757.722	685.049	1077.47
Chr1	81592	82585	enhancer	0.202296	521.481	348.414	820.827	655.704	712.506	529.296	531.451	426.235	477.364	542.049	560.654	501.284	439.895	1622.42	1370.76	445.623	499.352	1571.98	1505.77	1395.36	593.5	489.173	1938.32	1730.56	1790.4	1603.24	288.043	294.222	449.932	332.877	413.296	422.093	611.309	969.37	790.481	638.037	290.086	300.679	279.012	1948.8	1188.88	1825.02	2052	526.716	1564.54
Chr1	82793	83738	enhancer	0.211732	307.673	207.377	827.494	788.068	456.901	506.222	321.679	320.043	364.957	362.062	426.944	462.889	387.63	190.327	279.321	537.784	565.741	470.975	296.574	274.136	857.753	585.321	332.012	319.037	494.407	439.543	502.444	556.488	580.802	286.494	304.753	466.531	579.901	630.827	582.778	1108.53	426.877	318.228	347.012	789.16	797.198	708.926	395.173	439.043	297.321
Chr1	85023	85792	promoter	0.258473	279.42	180.302	343.383	270.79	358.864	267.272	233.963	209.685	277.136	307.691	321.444	276.988	351.549	1080.03	980.29	161.278	145.741	1080.62	1116.04	1219.53	221.667	162.877	1246.93	1369.67	1237.78	904.012	234.531	217.87	186.16	154.198	234.531	154.136	151.827	142.593	134.278	90.1852	104.685	107.605	108.099	98.4568	137.216	162.765	142.79	131.864	243.13
Chr1	86722	87057	enhancer	0.242035	253.198	177.654	257.444	249.185	158.444	295.049	270.512	213.111	284.019	289.5	262	224.907	247.475	214.963	235.951	174.068	230.395	286.198	277.889	230.407	302.778	249.679	224.957	253.228	282.444	363.012	152.074	159.42	139.525	119.006	104.148	121.778	124.494	145.062	186.444	263.864	73.3457	101.333	83.6543	132.198	170.086	124.173	127.901	184.895	173.278
Chr1	88113	89138	promoter	0.184736	844.42	456.136	860.728	866.13	805.253	891.648	733.012	813.617	1087.05	1053.67	805.926	856.346	767.889	1354.02	1167	587.198	618.358	623.117	712.667	744.562	635.735	392.148	1109.8	838.679	992.519	845.111	374.981	485.605	789.938	536.012	565.698	457.704	511.79	598.846	579.833	915.914	441.259	561.37	629.34	355.506	410.623	410.37	660.778	794.568	834.932
Chr1	90956	91663	promoter	0.264851	240.444	133.71	250.932	229.728	223.988	312.111	282.222	261.864	344.815	294.296	323.642	340.136	390.247	553.272	507.259	300.611	338.327	682.111	464.852	482.87	421.173	268.284	399.278	422.957	326.889	439.543	291.846	273.84	324.994	245.901	286.833	346.123	322.247	314.648	346.574	579.049	173.605	235.457	194.037	316.321	247.42	297.148	557.932	547.531	607.5
Chr1	95276	96180	promoter	0.183946	485.698	403.963	772.531	834.235	693.568	769.926	573.006	549.259	693.481	589.241	601.074	725.272	644.074	547.025	596.185	711.753	779.056	691.241	639.179	641.685	957.296	562.914	919.358	756.025	746.58	709.58	421.481	493.432	588.37	400.531	423.469	522.914	524.352	578.988	588.383	926.907	360.809	387.296	199.056	692.63	590.364	580.469	1058.8	1071.94	926.191
Chr1	99008	100146	promoter	0.211225	1610.28	975.222	1456.3	1184.64	1111.01	1318.25	1282.1	1219.89	1624.35	1418.06	1133.64	1108.15	1035.15	1731.95	2090.56	1466.1	1349.49	1887.78	1694.13	1538.07	1852.79	1109.61	2338.89	2153.18	2333.17	2249.01	913.111	1088.67	1266.52	1041.19	1067.91	1250.74	1251.31	1481.49	1345.31	1566.74	917.519	1348.35	966.228	1029.63	1017.19	953.636	2242.33	2232.36	1847.42
Chr1	102494	102948	enhancer	0.302052	127.432	97.8951	157.469	107.025	125.593	113.407	153.037	121.975	180.42	142.111	161.296	154.765	115.877	222.79	274.963	86.2593	114.358	260.167	313.667	290.914	153.062	74.3827	223.815	224.259	195.852	140.654	166.012	242.185	135.901	65.963	110.34	168.58	165.444	193.79	169.802	144.247	87.0679	101.333	43.4938	502.198	472.444	431.037	691.802	594.346	630.333
Chr1	103827	104129	enhancer	0.300723	70.1728	11.0494	81.5185	67.0617	56.6975	103.593	42.0494	39.037	70.9012	68.4815	83.6543	71.5926	82.3827	206.642	184.123	52.1358	59.1975	132.025	201.123	119.191	78.8704	34.9321	126.185	122.815	137.833	136.765	101.716	157.531	217.086	133.074	169.086	246.228	237.34	256.525	237.877	204.031	97	140.062	117.481	208.969	288.259	186.37	240.642	235.747	173.278
Chr1	107255	109329	enhancer	0.160114	1992.37	1206.84	2357.77	2695.33	2154.8	2459.75	2650.58	2464.37	2773.89	2869.64	2329.81	2429.12	2148.94	2931.86	3125.68	1761.8	1798.39	4502.72	3155.83	3240.72	2670.94	1572.6	3438.43	3837.54	4030.25	4287.94	1746.4	2316.4	2124.25	1793.04	1717.54	1864.02	1802.01	1890.83	2018.73	2402.06	1234.46	1879.36	1563.69	2023.63	1922.78	1811.94	4766	4905.32	5060.43
Chr1	111618	113139	promoter	0.165974	1438.44	971.148	1821.77	1901.16	1275.11	1758.63	1532.21	1535.35	1803.96	1774.45	1488.32	1540.8	1436.36	1075.27	1226.33	1513.11	1548.38	1857.25	917.099	1122.42	2001.62	1112.11	1396.93	1150.25	1048.02	1278.52	1715.11	1734.9	1789.65	1320.31	1299.29	1209.7	2115.63	2077.67	1996.6	3842.48	1122.17	1491.57	1272.76	1662.49	1527.64	1570.76	1617.57	1731.12	1752.39
Chr1	113866	114404	promoter	0.304499	347.809	192.642	312.296	309.975	290.543	431.191	348.481	358.642	559.84	525.685	425.79	369.444	383.938	328.802	400.58	287.185	367.136	523.099	478.586	416.204	461.531	260.358	478.272	384.247	471.21	500.136	329.914	441.975	517.864	338.704	289.852	511.438	399.321	419.543	410.901	599.901	301.926	358.111	251.877	361.321	456.407	388.346	460.444	450.765	446.728
Chr1	115757	117162	promoter	0.20586	885.099	504.16	1152.57	1066.12	872.062	1299.37	1117.74	1336.31	1572.41	1493.98	1475.93	1321.06	1468.99	1381.2	1423.66	658.481	727.432	1402.04	1495.59	1408.16	864.864	562.914	1819.07	1392.49	1440.14	1177.4	1004.59	1280.04	1010.04	771.074	839.346	911.87	1086.65	1032.67	1135.96	877.926	582.321	761.975	711.975	913	862.272	792.716	1779.38	1579.02	1833.15
Chr1	118213	118993	promoter	0.250916	845.457	394.864	573.944	509.802	470.821	1013.85	725.025	713.222	949.901	965.08	807.272	821.568	864.074	535.21	514.309	395.802	443.92	325.012	457.951	405.333	650.012	470.58	435.025	475.457	584.407	523.012	860.29	947.617	534.605	463.099	482.414	454.889	732.815	814.198	843.272	1048.75	423.926	596.951	577.16	670.173	740.37	683.753	648.691	733.062	803.815
Chr1	120135	121567	promoter	0.129395	1155.69	866.765	1210.01	1261.15	922.494	1710.86	1672.29	1382.97	1834.19	1478.2	1351.06	1455.06	1615.72	547.025	734.747	1523.05	1406.46	774.605	657.84	638.247	2413.32	1262.07	651.34	820.58	817.963	1195.57	1604.21	1559.38	1804.15	1073.36	1354.11	1441.91	1509.38	1682.36	1573.17	4701.94	1371.56	1613.84	1339.67	1867.93	1950.86	1680.78	902.006	951.198	746.099
Chr1	128013	129830	promoter	0.174612	938.426	546.457	893.019	790.63	594.895	914.16	829.753	822.086	1008.7	895.481	923.179	866.698	727.451	1099.52	1102.48	805.457	788.296	1088.41	1101.1	992.494	1050.77	750.444	1066.54	1178.54	1369.3	1304.65	611.944	633.259	542.556	520.16	603.84	607.704	525.469	490.012	539	760.481	433.728	551.296	262.741	479.568	403.914	396.136	1705.16	1608.67	1711.95
Chr1	130317	131675	promoter	0.12231	943.111	447.926	1340.47	1262.77	1207.04	1264.62	1053.55	1067.91	1410.91	1227.27	1049.24	1072.56	947.815	1108.59	1337.77	1247.91	1220.55	1096.19	1052.86	1088.83	1754.23	1115.28	1440.67	1295.85	1332.6	1383.89	1190.6	1652.51	1844.38	1180.01	1201.56	1658.14	1336.06	1547.41	1514.75	2179.94	1100.67	1316.52	1174.49	1349.12	1250.2	1285.89	2390.65	2637.15	2356.22
Chr1	135122	136345	promoter	0.196403	623.216	444.37	844.58	707.136	622.667	977.58	851.346	809.284	967.71	893.346	776.173	1056.19	836.914	1319.68	1313.77	595.827	602.562	1638.99	1248.99	1445.89	777.302	476.802	1231.98	1340.14	1423.06	1124.8	562.296	684.778	620.556	466.648	613.488	522.296	385.049	438.222	411.815	599.901	337.37	442.457	253.605	561.056	496.617	507.864	742.802	800.099	1033.78
Chr1	138023	139368	promoter	0.254861	328.716	299.358	856.753	757.506	540.012	612.457	607.228	554.568	571.321	571.389	448.019	499.469	464.852	512.5	550.278	769.852	719.611	857.247	621	431.463	1128.94	786.519	656.636	551.364	725.92	770.698	524.704	545.79	482.901	357.833	346.389	537.198	620.574	726.086	673.981	909.062	334.123	271.778	401.605	781.204	756.29	600.506	691.802	656.617	574.049
Chr1	139785	140791	enhancer	0.187034	386.802	317.469	416.204	462.66	484.753	557.444	456.79	472.302	505.111	522.611	386.346	442.358	485.802	839.988	835.636	328.556	306.272	913.451	683.272	698.012	427.821	293.488	841.63	709.235	786.346	690.117	454.58	538.957	818.667	467.123	560.698	531.969	495.741	524.259	474.58	622.142	458.123	446.383	282.198	635.432	621.691	548.407	1379.14	1367.13	1257.08
Chr1	141307	142221	promoter	0.235074	516.827	418.543	455.901	489.506	414.383	597.185	483.975	506.265	627.068	580.049	542.111	583.198	544.019	967.938	1019.58	269.228	244.401	1061.58	1015.86	898.352	352.432	315.506	1300.35	1004.3	901.617	720.444	291.846	283.438	464.667	298.802	318.599	299.481	206.049	221.401	221.821	449.154	211.988	361.08	290.605	264.321	249.235	266.611	742.802	793.049	746.099
Chr1	143084	143810	promoter	0.284818	205.42	159.741	247.914	269.494	243.358	383.302	305.395	344.741	366.827	344.58	301.963	379.543	394.123	524.025	405.889	279.66	270.63	361.216	337.92	573.469	379.136	241.321	520.42	486.198	559.198	430.148	220.84	305.16	237.58	200.16	200.136	262.654	279.333	257.531	246.086	319.062	127.309	213.358	106.951	409.735	320.802	290.914	652.284	624.611	540.099
Chr1	145830	147281	promoter	0.202952	996.173	598.327	1677.09	1443.89	1282.02	740.605	764.395	875.636	991.932	901.846	918.642	919.944	765.728	1988.41	2059.91	593.012	559.84	1857.25	1622.81	1587.98	730.494	532.667	1954.68	1885.33	1797.41	1932.46	369.426	554.735	794.463	609.864	746.346	562.753	501.309	632.815	627.191	990.5	421.352	677.778	400.753	513.494	466.198	505.642	785.691	745.21	599.654
Chr1	148673	150244	promoter	0.233698	513.031	453.679	866.988	951.901	580.63	665.272	763.074	679.432	714.988	686.309	578.148	653.864	630.111	437.63	578.543	830.975	975.099	582.228	736.049	566.84	1275.52	885.383	1147.7	723.383	1022.64	1121.31	588.012	619.346	777.568	445.741	522.383	618.765	890.025	831.778	929.321	1202.35	548.691	422.636	390.08	799.099	704.247	765.259	522.272	518.099	403.975
Chr1	155967	157330	promoter	0.232959	1818.06	1251.44	1701.17	1645.43	1333.85	1904.45	2084.2	1816.54	2163.01	2152.95	1729.8	1706.36	1948.8	1894.06	2174.91	1556.77	1665.64	2763.03	2337.93	2221.8	2516.59	1721.3	2696	2820.64	2731.72	2465.17	1930.48	2255.65	2720.49	1927.49	2154.8	2449.07	1990.49	2132.55	2145.64	3318.94	1657.02	2038.54	1626.28	1997.2	2088.3	1838.48	2226.2	2292.65	2073.35
Chr1	158530	159901	promoter	0.167674	1383.89	1061.52	1658.14	1691.35	1431.79	1873.24	1950.65	1660.32	2104.58	2126.81	2006.81	1931.01	1792.84	2324.3	2664.38	1290.95	1433.61	2566.97	2470.37	2431.04	1943.01	1523.05	2966.1	2449.07	2345.98	2168.59	1210.58	1606.99	2355.38	1767.46	1920.74	2052	1661.32	1817.01	1767.74	3599.15	1262.91	2199.75	1379.25	1282.75	1186.41	1076.86	3258.02	3413.88	3780.58
Chr1	162500	163496	promoter	0.193609	646.358	607.148	542.981	543.253	506.432	884	835.333	653.346	960.086	888.383	843.111	884.198	883.877	1070.3	1302.01	519.37	630.568	1193.51	1277.36	1422.12	691.512	560	1383.98	1440.48	1225.54	1112.78	459.994	547.642	735.037	711.037	504.957	540.148	514.123	558.963	551.401	711.117	377.556	585.802	426.42	462.994	393.827	403.58	921.889	901.846	1019.99
Chr1	166920	168713	promoter	0.156904	947.617	728.086	1215.88	1181.04	888.265	1188.98	1364.3	1216.57	1361.48	1313.94	1165.42	1102.13	949.204	831.815	887.84	1160.73	1148.65	1341.78	1150.37	1178.68	1836.75	1203.43	1532.78	1318.81	1450.73	1340.57	1085.17	1019.36	948.5	657.056	648.16	783.148	799.136	824.944	793.858	2337.47	749.179	575.889	528.383	982.031	812.877	857.457	1076.53	1095.19	902.352
Chr1	171522	171958	enhancer	0.30048	280.284	85.0247	291.272	281.605	226.481	317.21	272.451	315.951	396.296	408.253	253.438	251.617	240.778	306.111	216.444	149.506	172.679	246.877	211.105	161.568	226.08	116.827	288.327	239.42	258.457	283.605	329.914	368.951	197.926	147.951	139.123	213.914	284.432	262.796	243.988	198	97.8642	124.309	93.5556	409.735	416.204	383.568	251.969	279.691	173.278
Chr1	172447	174019	promoter	0.227905	3604.3	2107.84	3114.67	3095.34	2470.64	3773.42	3711.4	3572.69	4301.72	3887.19	2730.55	3402.78	3330.84	2198.14	2739.65	3813.78	3698.64	2727.16	2798.48	2167.61	6282.38	3805.81	4302.85	3097.75	4161.91	3601.83	2514.05	3205.83	3146.3	2773.05	2933.8	3051.78	3210.72	3402.07	3206.95	4029.2	1491.57	1793.51	1542.57	3851.7	3856.49	3729.16	2256.4	2640.36	2122.53
Chr1	176690	177549	promoter	0.2322	817.34	433.728	893.019	902.556	739.031	925.346	1213.86	970.37	1070.3	1094.83	831.284	829.877	875.049	641.099	827.519	810.981	727.432	874.963	621	853.154	1281.22	760.895	921.648	1048.02	1112.86	1285.78	727.975	866.259	557.327	477.327	466.944	625.148	715.883	685.049	590.901	1238.77	314.531	462.617	378.395	660.148	660.383	592.006	1137.02	1165.3	1019.99
Chr1	178447	179495	enhancer	0.23949	1862.04	981.852	890.29	870.222	850.062	1191.64	1286.8	1321.17	1645.43	1756.69	1333.35	1399.23	1247.31	2383.12	2619.52	557.444	621.469	1895.12	2202.6	2075.59	973.593	727.222	2401.8	2368.04	2458.69	1907.52	583.84	872.691	591.37	666.432	666.654	580.605	356.63	354.574	407.951	624.852	391.296	789.037	527.438	232.34	349.753	396.136	546.025	489.84	489.42
Chr1	180244	180496	enhancer	0.305052	223.278	141.636	142.395	166.753	118.623	189.247	218.056	183.753	246.247	211.284	178.185	224.907	163.654	174.401	104.951	76.2716	95.9198	36.7284	147.123	194.438	146.679	85.7284	114.562	114.765	145.889	107.296	237.568	338.574	170.543	153.679	176.444	165.605	163.889	167.272	175.222	235.63	158.333	205.753	171.975	120.395	99.0741	71.4198	93.2346	63.0802	101.21
Chr1	181994	183973	enhancer	0.199475	3644.38	2260.49	2783.58	3078.94	2494.58	3238.02	3083.91	2913.31	4018.75	3673.53	3082.27	3210.01	3084.78	4064.53	4246.3	2097.4	2144.09	3543.01	3866.1	3400.75	3259.17	2247.17	4801.42	4445.49	5154.65	5146.41	2554.67	3356.85	3365.14	2759.27	2710.74	3731.01	2448.72	2738.22	2638.04	5612.22	2120.3	3280.63	2911.62	2058.1	1920.27	1919.2	2849.8	2766.99	2889.91
Chr1	184186	185817	promoter	0.194335	1106.9	671.679	1522.08	1464.9	1063.19	1267.72	1276.52	1299.88	1511.67	1431.19	1139.38	1399.23	1256.45	1385.25	1408.78	956.593	1044.41	1394.1	1052.86	1134.06	1455.85	985.228	1408.16	1313.15	1697.73	1547.53	1251.16	1468.99	1033.86	926.938	855.043	1117.96	1127.18	1226.72	1099.01	1604.34	838.086	1336.52	1003.15	930.531	919.062	947.222	1534.48	1559.38	1448.74
Chr1	186673	187615	promoter	0.272639	617.099	388.012	715.519	645.531	461.667	920.957	875.265	820.105	1028.16	897.019	791.543	818.37	798.358	677.84	594.198	597.321	559.84	791.975	683.272	698.012	862.309	470.58	908.593	829.191	1157.15	852.735	801.37	770.21	570.407	472.302	374.272	688.975	531	602.815	546.16	1120.8	395.068	481.074	414.346	670.173	661.741	692.037	691.802	672.914	531.29
Chr1	189977	190778	promoter	0.176728	419.259	325.821	752.34	633.988	532.79	402.13	398.611	407.642	416.253	421.42	369.84	426.914	340.679	399.222	411.475	772.284	738.191	204.333	258.969	330.34	1155.36	817.963	670.71	399.667	420.08	484.901	489.173	557.864	904.562	582.586	710.105	1015.2	1098.41	1238.91	1127.65	1918.51	438.58	391.58	578.988	1328.32	1114.65	1130.14	1054.88	1082.85	850.957
Chr1	192306	192753	enhancer	0.304971	101.086	64.179	83.9753	76.6543	86.3148	114.679	103.593	95.5432	115.531	107.519	105.414	116.074	82.3827	174.401	254.556	71.5926	68.5062	145.395	180.043	151.191	141.494	104.16	397.488	210.309	152.981	220.327	102.395	122.864	256.235	155.191	165.025	212.716	204.383	203.556	215.938	359.778	115.302	140.062	132.753	205.84	163.469	162.765	161.444	166.698	127.198
Chr1	194014	195955	promoter	0.168711	2251.69	1304.15	2874.12	2626.19	2486.91	2421.65	2707.94	2567.19	2734.12	2761.12	2694.06	2695.33	2390.9	4423.54	3936.42	6000.95	6111.02	4879.38	4716.65	4949.18	2916.65	1783.65	3660.51	3891.85	3726.65	3414.99	1672.51	2356.22	2543.25	1984.79	1905.91	2021.01	1824.04	2066.99	1991.23	1966.21	1220.12	1896.68	1498.25	1414.91	1501.62	1454.22	4285.43	4458.8	4628.32
Chr1	198259	200038	promoter	0.15006	2406.99	1513.32	2049.06	1934.99	1868.43	2530.59	2751.02	2406.99	2778.54	2570.36	2103.91	2533.63	1904.81	3048.82	3324.59	4485.54	4277.99	3780.58	4332.65	4395.24	2249.5	1615.31	5099.48	4455.56	4775.69	4454.02	2796.63	3058.48	2008.75	1995.99	2138.69	1904.13	1923.1	2208.85	2079.07	3774.27	1747.91	2398.32	1980.23	2088.69	2024.25	2017.58	2332.28	2470.64	2332.28
Chr1	201433	202256	promoter	0.270012	692.074	408.253	536.352	468.062	532.79	899.469	815.21	754.247	993.16	961.469	632.068	806.086	633.296	629.815	686.469	821.272	788.296	653.938	973.074	910.407	509.994	263.136	1210.12	849.543	918.272	908.309	801.37	952.173	408.704	424.395	483.716	348.414	410.568	404.815	390.105	668.852	379.364	527.481	275.815	630.963	656.951	593.963	609.778	549.475	438.877
Chr1	204486	204873	promoter	0.285111	435.444	207.377	172.037	211.432	215.321	418.383	306.926	323.321	479.698	485.593	354.488	426.914	454.506	794.636	741.778	331.389	341.975	691.241	862.716	750.142	192.42	140.056	433.309	521.63	474.099	507.864	153.037	232.617	164.117	165.123	207.636	191.691	119.025	141.333	166.025	171.975	92.7099	228.346	154.981	132.198	132.049	113.525	472.901	440.685	582.84
Chr1	206081	208864	promoter	0.196442	3788.49	2577.32	4236.87	4081.01	3181.3	4126.68	4480.68	4079.86	5231.16	4674.73	4028.16	4058.14	4093.27	2572.42	2739.65	12828.6	12828.6	3425.8	3667.53	3245.25	8133.02	4480.68	3140.9	3330.84	3440.43	4374.94	4061.4	5016.47	5023.69	3800.2	3882.28	4312.38	4769.64	5149.38	4789.68	10747.8	2554.67	3595.75	2893.97	4551.85	4755.58	4289	3612.06	3773.42	3139.17
Chr1	210509	211096	enhancer	0.275899	278.617	248.753	267.691	278.321	235.235	504.802	449.123	323.981	443.494	489.889	418.148	451.463	376.765	572	586.877	908.235	934.012	782.932	996.531	929.481	693.883	472.852	495.444	721.907	773.037	739.475	316.63	446.642	377.414	236.901	279.809	406.012	559.728	606.519	536.42	776.481	255.309	213.358	295.519	578.772	517.444	433.309	406.568	472.494	497.247
Chr1	214943	215169	promoter	0.304175	23.6358	26.8889	13.5864	17.7407	11.1667	32.8395	23.7284	25.9383	36.6852	27.784	37.6914	36.5802	28.2284	129.056	38.7407	19.6481	23.537	49.9753	62.6914	37.7593	12.5802	6.44444	39.3827	22.2222	11.0494	8.92593	28.0988	38.2469	37.9259	24.0741	15.1728	47.7099	13.5864	25.8889	26.8025	15.0494	34.4198	24.6173	58.8333	5.66667	10.8951	13.9383	123.074	60.8765	127.198
Chr1	218673	220723	promoter	0.106269	1592.8	1031.96	1850.89	1753.48	1143.3	1707.93	1761.63	1698.74	1917.96	1722.01	1477.61	1601.59	1528.38	848.815	1077.42	5506.69	5111.69	1333.85	845.938	1176.23	3386.69	2039.02	1513.74	1393.15	1694.36	1868.43	1759.56	1886.12	1958.65	1384.9	1411.79	1674.02	2071.42	2270.07	2113.95	4454.02	1252.33	1328.25	1092.67	2187.63	1921	1744.31	2819.8	2842.36	2276.1
Chr1	224733	226127	promoter	0.221399	1765.06	1110.02	1618.12	1541.91	1320.22	2520.3	1983.78	2061.41	2608.3	2288.73	1770.58	2276.3	2128.59	2410.62	2339.96	3552.13	3429.19	2535.71	2066.85	2563.23	2370.17	1474.05	1972.43	1981.88	2101.4	1833.26	1770.47	2025.31	1787.05	1206.52	1503.4	1630	1508.91	1562.77	1610.19	2420.28	1129.41	1642.93	1015.35	1550.99	1465.52	1323.53	2150.06	2348.57	2421.37
Chr1	227062	229306	promoter	0.151449	3002.31	2122.74	3051.37	2999.37	2358.59	3790.36	2968.56	3337.49	3538.37	3383.15	3077.65	3577.09	3571.94	2996.41	3545.37	5852.73	5931.37	3709.47	3276.42	3439.1	3729.16	2477.39	4086.88	3463.05	3512.67	3515.07	2447.54	2820.64	4678.75	2905.68	2778.54	2819.8	2851.14	3261.96	3144.12	5251.09	2230.2	3409.64	2934.85	1935.36	1970.52	2094.67	3137.75	3177.62	2428.78
Chr1	229835	230334	promoter	0.293657	117.889	77.0123	174.827	159.488	123.833	153.309	118.395	128	157.321	129.451	168.519	134.259	143.988	284.963	169.586	132.753	118.358	76.1235	135.667	173.265	93.7407	81	157.432	129.086	137.833	149.358	110.642	100.173	91.2346	81.9259	70.3457	93.2716	90.3457	80.4198	112.494	100.852	63.8025	93.2716	82.9568	101.895	121.5	67.2469	908.691	828.938	895.247
Chr1	232446	233048	promoter	0.288782	253.883	224.043	264.062	313.451	338.877	448.019	360.79	391.395	547.599	453.864	406.426	423.735	413.407	450.111	353.698	309.426	384.951	371.938	547.438	354.58	217.673	114.562	392.914	385.204	335.414	257.599	330.901	391.111	226.272	201.914	170.136	209.34	259	221.401	224.216	255.827	96.4753	237.29	148.642	322.272	347.642	332.747	440.031	453.42	582.84
Chr1	237437	238328	promoter	0.126309	727.432	495.025	642.333	628.259	574.148	855.358	831.111	759.395	969.111	832.167	836.296	1004.22	790.753	827.074	1124.86	1166.11	1154.69	1071.77	1052.86	1021.32	678.111	426.741	947.716	1110.02	1218.86	1136.21	534.037	674.704	661.741	487.741	677.222	715.951	613.741	671.025	657.932	974.284	331.765	396.778	367.444	723.593	676.852	657.148	1111.77	1204.46	1013.55
Chr1	239223	240354	enhancer	0.108264	808.204	598.327	896.241	1086.09	939.198	1323.53	1136.69	1217.58	1518.36	1400.17	1092.17	1489.6	1205.04	972.37	969.636	2142.15	1885.86	1071.77	1208.18	1198.99	1316.23	959.741	1283.65	1220.17	1519.34	1320.12	827.272	1056.23	896.494	578.426	646.21	970.025	776.907	715.475	700.395	1032.72	428.691	553.741	366.105	1259.32	1121.8	1085.47	1263.31	1414.21	1148.52
Chr1	245683	246493	promoter	0.214987	178.037	177.654	287.988	232.784	218.457	301.944	316.259	293.383	329.63	309.704	388.809	306.235	351.549	372.037	372.136	717.58	734.086	481.006	547.438	489.679	443.704	293.488	586.901	326.747	344.198	334.593	232.543	266.84	422.111	290.716	245.932	455.321	462.296	488.111	471.599	434.333	234.062	205.753	238.383	438.222	349.753	354.79	822.247	899.765	981.358
Chr1	248205	249427	promoter	0.1358	781.58	444.37	1035.73	839.037	933.395	759.5	837.667	739.21	778.105	750.185	841.877	822.519	712.012	1449.3	1680.78	1539.79	1538.67	1532.78	1735.93	1827.86	966.926	706.506	1395.85	1514.2	1473.4	1552.25	468.605	461.728	721.037	540.543	681.148	733.407	557.481	598.846	545.012	474.333	366.025	328.753	284.975	361.321	354.599	442.148	711.852	776.698	850.957
Chr1	254259	255208	enhancer	0.161294	278.617	270.58	498.037	615.16	446.259	433.519	447.914	454.42	461.531	423.975	395.735	490	335.556	1240.09	1060.86	1213.15	1051.09	1571.98	1272.07	1646.21	613.593	467.938	1001.57	1333.23	990.037	1002.79	291.846	383.765	316	275.395	207.074	378.259	388.642	462.864	391.5	423.852	126.019	244.16	180.753	350.673	382.272	359.549	961.037	1013.75	959.302
Chr1	262181	263159	promoter	0.129673	688.864	348.414	649.938	589.031	513.444	823.79	682.549	701.753	843.383	834.809	575.802	693.815	749.148	1121.73	1157.09	1143.4	1102.24	1298.47	1218.6	1224.02	653.827	517	1132.82	1005.19	1193.72	1162.1	651.222	622.222	634.488	514.457	545.537	556.778	548.815	548.284	464.827	487.543	348.321	445.148	477.556	446.457	523.296	431.037	1157.71	1179.33	1349.32
Chr1	265988	266618	enhancer	0.29306	430.006	268.21	532.605	519.401	435.741	482.216	507.901	539.259	653.864	542.049	472.272	452.556	511.42	437.63	381.667	843.074	740.333	572.284	423.444	438.123	583.673	355.272	423.148	401.259	479.062	548.438	521.333	578.914	546.889	404.864	377.975	461.494	548.037	609.605	550.593	1149.54	295.753	428.383	308.284	578.772	481.642	471.16	633.444	792.673	682.488
Chr1	267759	268676	promoter	0.115615	1724.47	1244.65	1104.44	1202.35	940.198	1730.45	1507.25	1407.24	1686.17	1610.75	1321.35	1331.47	1635.05	699.154	959.302	2601.43	2245.09	966.556	934.951	940.198	1973.85	963.358	1267.91	1079.31	1373.43	1403.53	1704.23	1943.53	1575.76	1306.1	1360.98	1528.19	1455.92	1553.99	1521.78	5173.83	905.08	1110.96	1101.22	2075.81	1820.66	1803.05	1981.44	2121.32	1508.31
Chr1	269139	271246	promoter	0.162775	1938.04	1411.47	1875.72	2050.94	1164.57	2140.59	1876.88	1794.53	2266.79	1864.52	1930.48	1785.93	1890.51	880.741	1290.79	3372.7	3393.12	1410.91	1316.39	1290.04	2132.55	1603.47	1614	1365.93	1684.86	1479.67	1773.06	1862.04	1446.47	1124.53	1115.86	1509.28	1266.45	1422.8	1357.38	2782.84	1284.16	1420.48	1044.6	1599.81	1545.41	1559.94	1831.67	1857.36	1572.31
Chr1	274415	275598	promoter	0.145465	640.136	412.519	860.728	977.204	864.235	869.296	907.086	848.864	863.296	896.586	864.753	793.593	772.272	886.469	982.753	1423.16	1611.48	1548.38	1450.64	1399.88	959.019	650.012	1504.57	1270.07	1243.78	1422.67	624.006	711.531	913.691	794.568	870.222	679.593	730.16	741.074	756.654	1337.47	420.654	510.253	657.148	723.593	667.42	733.704	861.951	966.605	860.105
Chr1	278326	278605	promoter	0.305085	112.778	74.5309	116.901	78.7716	104.969	182.494	143.346	146.346	225.846	161	168.519	116.772	194.284	206.642	142.235	288.543	248.481	189.556	313.667	278.759	191.16	123.735	183.444	251.08	185.074	204.272	139.272	172.642	139.111	119.753	127.198	181.889	141.407	161.457	169.802	100.852	87.9938	115.302	88.0247	132.198	126.84	109.753	219.191	208.438	252.87
Chr1	282129	282623	promoter	0.280389	271.062	270.58	250.932	340.889	435.741	338.846	267.537	387.296	386.284	361.241	305.377	302.963	255.086	424.802	351.84	446.741	425.562	204.333	83.1728	269.117	317.901	171.383	292.309	235.864	208.716	124.506	113.562	137.704	191.778	157.346	157.185	95.7407	127.79	139.907	151.525	275.877	95.2654	132.364	158.802	135.802	119	78.8704	77.3827	83.2963	60.9136
Chr1	283985	284774	promoter	0.245699	321.963	306.37	343.383	402.198	307.432	516.673	385.716	434.605	444.636	410.012	353.568	318.469	310.698	313.444	335.728	657.469	572.284	371.938	322.136	479.352	425.821	318.037	536.352	420.444	370.333	363.012	246.117	296.222	440.704	338.302	386.13	341.611	329.957	387.679	384.543	683.623	260.846	277.889	190.963	399.685	397.272	290.914	529.79	566.235	489.42
Chr1	290637	291940	enhancer	0.155683	677.938	431.463	779.185	896.728	790.049	672.346	684.16	613.827	721.358	784.185	602.512	759.704	602.63	1199.66	1361.57	1331.99	1257.92	1371.9	1532.05	1453.43	858.494	608.321	1420.38	1375.31	1420.64	1218.27	544.704	619.346	741.735	617.296	634.716	645.852	624.438	623.216	668.877	724.975	482.383	765.784	397.963	587.191	548.605	561.432	1232.56	1291.52	1234.65
Chr1	292726	293599	promoter	0.116984	790.926	451.753	761.975	812.148	766.994	822.519	880.994	971.358	1030.91	982.642	858.383	881.827	858.753	1394.44	1273.83	1335.74	1176.14	2344.52	1700.3	2006.38	902.728	570.796	1703.98	1758.31	1538.23	1215.43	581.617	696.111	1113.1	943.451	1029	747.765	723.012	787.667	822.623	972.654	406.185	674.549	582.407	644.784	514.457	563.642	889.864	987.259	974.235
Chr1	294843	295377	promoter	0.303259	267.642	231.074	305.13	370.58	289.333	290.37	331.5	324.556	438.827	360.42	294.309	269.963	309.148	313.444	176.988	480.599	488.728	246.877	305.574	303.068	424.21	318.037	259.481	271.099	310.068	341.654	311.79	355.296	321.562	258.79	351.296	294.704	403.691	428.63	426.944	615.852	171.667	265.198	260	342.432	342.383	285.025	440.031	457.296	358.42
Chr1	297921	298891	promoter	0.201333	1415.1	1061.52	1135.09	1184.64	1121.04	1569.6	1554.14	1424.22	1845.96	1718.52	1378.69	1405.37	1474.72	2620.62	2844.36	2477.39	2255.01	2891.32	2886.52	3146.79	1821.09	1092.74	2010.81	2322.8	2333.17	1759.44	1099.65	1312.08	1496.74	1265.59	1332.7	1460.91	950.593	1151.32	1117.96	1745.83	846.407	1077.42	1059.41	1107.57	1028.01	1005.74	1691.48	1771.96	1868.99
Chr1	300704	301465	promoter	0.231083	167.358	147.309	226.167	226.148	170.117	182.494	178.759	192.519	190.926	206.148	226.617	215.272	271.988	222.79	302.296	235.136	258.457	438.58	296.574	326.13	172.086	129.432	469.259	254.222	365.117	326.975	292.778	379.963	487.796	327.759	321.852	774.438	422.444	472.185	469.605	549.636	255.988	300.679	274.358	535	441.92	401.259	2046.44	2108.2	1944.46
Chr1	302094	303850	promoter	0.214314	2837.47	2066.25	3619.42	3562.79	3211.36	2715.54	2773.89	2890.81	3128	3276.42	2769.84	3019	2731.72	3356.85	3116.15	6210.25	6058.8	3840.6	3472.02	3642.67	4740.98	2898.88	4315.91	3635.75	4079.86	3541.86	1679.3	2101.22	3901.22	3156.93	3217.23	3189.86	2940.79	3291.6	3245.25	4935.16	1576.05	2163.78	1735.25	2576.49	2497.93	2440.6	4085.47	4243.8	3843.35
Chr1	306085	306604	promoter	0.288864	538.272	483.136	280.944	273.926	178.432	624.086	595.432	582.914	772.63	596.488	539.519	585.154	559.605	412.537	283.79	686.914	554.735	405.63	337.92	290.914	563.71	369.914	491.198	351.42	448.568	422.741	706.019	679.568	454.654	401.383	347.963	446.16	340.562	399.58	346.574	1786.04	410.136	476.296	438.988	602.877	447.951	528.16	356.377	324.16	438.877
Chr1	308813	310596	promoter	0.118741	1498.95	878.173	1751.84	1706.04	1181.94	1656.56	1660.88	1775.01	2010.68	1913.94	1458.41	1475.7	1547.53	1004.93	1193.65	2487.25	2280.19	1096.19	1248.99	1191.41	1747.62	1200.33	1280.63	1099.2	1235.73	1527.53	1816.18	1999.69	1974.99	1509.28	1342.85	1603.1	1838.07	1868.99	1915.07	3034.57	1142.94	1271.11	1145.86	1646.9	1522.38	1522.49	1565.8	1620.26	1427.86
Chr1	312345	312949	enhancer	0.30058	199.444	149.963	216.772	244.673	140.84	241.086	296.944	225.309	252.346	261.901	287.796	217.827	293.346	206.642	138.08	555.568	517.222	118.185	169.154	225.846	479.914	331.222	174.438	170.531	215.191	192.593	256.451	288.543	213.568	141.864	135.222	240.642	286.111	343.346	325.753	388.346	113.654	135.352	165.235	350.673	292.444	335.642	232.037	225.13	151.228
Chr1	315642	316461	promoter	0.203902	415.815	332.79	419.481	534.247	389.086	595.728	602.815	599.062	688.494	595.679	499.654	614.914	556.42	350.679	375.926	850.753	868.29	602.259	393.469	615.901	611.179	465.556	483.586	496.741	476.765	604.154	513.938	623.79	583.605	491.247	523.531	611.802	519.167	641.938	565.833	691.951	322.765	300.679	464.914	515.802	560.698	455.895	739.031	711.494	574.049
Chr1	319189	320061	enhancer	0.247172	322.722	327.988	402.741	498.241	399.37	534.13	417.586	572.42	500.117	597.111	364.84	357.914	435.877	710.105	619.926	991.309	1020.56	700.593	753.086	589.79	667.012	405.136	714.494	571.352	556.049	507.864	295.901	296.222	497.895	330.753	357.198	233.173	278.753	280.975	275.16	253.333	199.333	233.5	55.8765	219.056	203.37	149.136	282.16	312.284	358.42
Chr1	322551	323233	promoter	0.275396	247.753	226.389	343.383	340.889	295.778	406.093	477.765	436.074	518.086	503.204	362.673	373.802	449.296	328.802	315.222	638.963	690.488	394.296	322.136	416.204	521.593	293.488	361.309	342.469	301.123	519.327	394.969	412.605	325.562	317.5	216.377	436.173	416.667	417.525	385.617	380.142	195.444	242.407	212.981	446.457	403.914	352.284	379.753	425.383	446.728
Chr1	324470	325700	promoter	0.100807	1692.02	1430.44	1649.06	1653.26	1253.64	1997.81	2111.3	1813.19	2404.57	2104.97	1641.99	1810.37	1784.81	601.012	982.753	4090.77	4055.1	1136.57	1035.83	1125.15	3344.22	1952.35	975.265	1142.88	1394.56	1536.78	1722.87	2116.22	1732.08	1445.16	1382.58	1644.48	1851.4	2172.04	2042.35	4615.7	1219.58	1117.43	1292.36	2111.69	1925.36	1744.31	1285.56	1414.41	1263.62
Chr1	330378	330683	enhancer	0.304169	98.1852	43.4074	57.6049	81.1975	90.3827	84.8765	79.9506	82.2963	129.901	107.519	125.765	96.2963	101.444	106.148	85.1111	66.3086	62.6914	103.821	102.92	141.148	64.7778	76.5185	120.642	87.8272	95.9753	81.037	54.7654	44.2346	68.2593	74.6235	61.6296	26.0741	49.1111	63.5802	69.1728	84.642	55.5864	93.2716	51.037	75.8333	77.9877	27.5802	55.7778	78.2593	101.21
Chr1	337015	338564	promoter	0.104227	1090.36	907.469	1226.19	1280.46	1054.19	1422.93	1155.36	1101.35	1387.12	1134.66	1121.99	1175.4	1115.73	954.531	953.068	2356.06	2391.15	1179.88	1244.48	1189.43	1696.99	1169.78	1016.6	1101.31	1074.21	1095.91	1004.59	955.648	1264.59	967.827	1078.42	1208.18	1251.31	1245.78	1293.32	1874.67	858.185	1065.67	1086.62	1142.81	1100.54	1016.09	1177.8	1333.35	1324.48
Chr1	342021	342785	promoter	0.221294	430.006	379.556	566.84	570.537	555.241	595.728	551.79	591.778	582.093	705.66	515.877	577.556	558.691	672.222	834.179	909.272	970.321	1163.22	1101.1	1100.17	714.086	591.074	750.506	988.815	946.086	874.963	344.222	499.568	817.469	642.901	630.16	599.809	670.71	765.691	706.395	833.79	327.556	428.383	311.772	578.772	537.63	471.16	609.778	609.198	639.099
Chr1	343644	346061	promoter	0.142195	1657.28	769.407	2142.53	2095.65	1643.05	1823.3	1770.47	1772.53	2107.14	2068.19	2059.62	2106.75	1696.86	2687.85	2771.43	1787.54	1956.88	2797.51	2940.79	2903.5	1489.41	1161.58	2565.68	2443.88	2464.61	2159.14	978.222	916.432	1109.46	942.531	1070.12	860.691	735.944	819.173	756.654	921.383	750.037	908.877	836.654	532.765	561.951	490.296	2689.86	2838.33	3139.17
Chr1	346327	347054	promoter	0.304156	142.79	123.63	340.154	337.716	192.593	175.407	246.037	223.667	228.815	196.654	173.012	172.426	131.698	174.401	123.136	451.846	475.623	218.272	124.123	194.438	442.475	296.086	134.883	125.136	236.914	224.16	143.148	152.963	78.0864	71.4568	81.0123	168.58	163.889	168.42	142.21	326.58	98.3025	94.7407	55.2716	298.506	262.741	207.284	178.432	163.506	139.444
Chr1	347548	348008	promoter	0.302244	133.469	100.21	57.6049	82.3951	72.2531	117.123	125.716	125.58	188.432	149.932	167.284	134.259	160.907	129.056	133.71	93.2963	90.3889	189.556	102.92	167.568	63.5556	38.5556	171.16	162.222	67.8827	94.3889	113.562	112.648	115.556	95.4691	93.8025	80.0741	59.8457	48.6173	56.6667	235.63	118.191	101.333	90.5926	54.3765	88.3457	51.858	137.519	125.006	101.21
Chr1	352866	353311	enhancer	0.297429	74.0617	69.5802	222.722	188.457	172.951	157.29	145.716	129.889	176.994	145.148	123.123	153.265	158.481	34.037	107.185	396.889	321.185	174.63	93.1728	189.247	375.87	287.407	123.864	137.216	159.494	132.821	142.185	109.457	91.2346	75.284	88.1358	101.117	164.704	203.556	163.068	243.074	97.8642	67.3951	85.7531	164.673	180.642	145.654	157.241	150.222	101.21
Chr1	354492	355455	promoter	0.220119	543.099	301.667	685.914	692.63	525.716	547.025	624.086	559.481	637.938	631.395	525.037	464	704.889	450.111	561.309	1011.9	917.907	543.272	669.784	675.778	817.173	519.722	817.34	690.741	668.765	589.444	347	433.29	401.765	329.821	270.827	433.778	346.914	393.37	351.63	611.84	342	303.907	366.827	428.556	437.556	315.136	406.568	515.136	394.969
Chr1	356176	357759	promoter	0.173298	721.568	509.506	1137.65	1067.81	980.049	606.253	641.543	777.494	628.914	681.272	766.772	698.185	771.074	1194.78	1307.93	1073.04	979.864	1154.11	1302.93	1328.46	838.037	552.778	1746.1	1396.01	1342.5	1336.95	385.889	508.056	908.198	718.704	726.568	584.173	716.519	657.753	707.13	870.889	438.58	429.988	319.302	507.66	467.852	473.519	1047.23	1008.28	943.926
Chr1	358683	358888	promoter	0.304523	21.2469	46.2469	98.5432	83.716	38.6975	54.0617	56.9506	55.0802	59.3827	54.0741	66.3765	44.679	39.7407	144.543	85.1111	139.938	122.241	118.185	180.043	86.5679	147.302	70.0617	77.6235	86.6358	74.6296	63.2593	53.0864	30.6667	42.3333	40.7037	50.0494	72.3025	78.6296	63.5802	66.9506	119.679	19.2469	16.4259	23.2284	79.5679	111.198	89.0741	87.6914	123.938	74.1728
Chr1	362675	365623	promoter	0.132345	2263.04	1531.86	3554.47	3677.09	2614.38	2804.98	2518.37	2692.19	3221.41	2780.72	2376.65	2917.46	2626.19	2020.07	2759.27	5620.38	5506.69	2526.57	2105.11	2003.86	4929.77	3397.11	1962.49	2196.78	2478.36	2888.72	2355.06	3060.75	2785.54	1847.72	1820.66	2790.7	2807.99	2732.91	2803.96	5069.94	1872.28	1941.06	1977.31	2739.04	2573.67	2329.57	4308.19	4896.67	4029.2
Chr1	367349	368711	enhancer	0.207774	490.932	293.938	1231.44	1102.35	806.525	500.333	674.296	679.907	580.969	597.765	610.704	583.198	514.198	666.741	692.815	809.537	752.216	653.938	567.71	685.086	720.444	437.926	571.395	503.784	491.963	656.901	1209.84	1313.59	1357.78	849.185	748.765	1201.44	1486.01	1452.01	1548.7	1986.67	731.531	776.784	581.136	885.852	902.988	754.148	2379.65	2421.94	2457.61
Chr1	369458	369898	enhancer	0.292677	178.037	64.179	136.185	198.383	231.284	154.685	123.037	137.21	191.444	212.981	148.093	145.525	158.481	350.679	383.241	225.617	278.519	273.617	250.025	295.031	188.16	109.185	204.222	212.358	174.333	188.704	157.29	167.111	306.679	233.056	292.235	224.864	267.235	323.531	264.117	190.241	139.568	210.432	80.1975	171.333	139.716	145.654	464.432	396.556	574.049
Chr1	371703	372212	promoter	0.304416	95.5309	55.4198	145.346	114.864	133.914	109.21	100.679	117.296	134.883	118.673	91.9136	136.747	109.457	166.79	173.352	127.309	95.9198	62.8025	180.043	245.123	137.21	72.2531	115.488	95.1852	152.981	128.475	171.117	177.833	241.79	217.556	163.469	171.728	275.877	223.309	229.716	245.531	112.21	145.827	185.34	157.617	232.926	210.481	428.586	479.154	522.494
Chr1	372422	373976	promoter	0.158397	652.58	470.395	1026.16	916.71	595.79	859.704	759.574	817.296	823.704	756.975	763.907	885.148	630.111	1075.27	1087.73	1276.52	1111.51	1595.67	1126.06	1090.96	957.772	637.654	659.37	973.704	857.605	923	771.877	976.877	893.198	763.025	707.611	796.142	814.198	839.988	840.525	1515.65	546.204	679.79	509.21	689.037	631.481	650.395	1401.89	1439.65	1648.4
Chr1	386585	387489	enhancer	0.288721	386.173	323.815	373.012	419.926	326.864	465.062	359.667	385.815	370.37	385.049	375.864	353.049	404.494	254.877	222.914	409.309	403.117	260.167	258.969	269.117	357.975	312.79	285.259	287.364	292.123	283.605	377.938	332.852	287.296	264.012	344.765	248.957	327.728	378.994	361.247	506.235	235.049	297.506	199.963	290.728	310.432	285.025	289.444	261.741	315.815
Chr1	389306	390111	promoter	0.20654	452.272	379.556	429.728	435.642	367.019	564.864	560.407	472.302	627.512	516.914	545.759	471.988	551.364	365.062	453.951	827.395	808.543	460.704	492.358	489.679	628.716	510.062	426.16	542.383	591.346	559.593	461.105	480.432	531.858	417.111	377.346	506.284	475.753	510.506	495.519	1021.67	335.864	425.395	427.951	380.58	519.222	465.019	492.864	490.821	472.395
Chr1	392371	393483	promoter	0.226316	439.951	325.821	802.235	824.259	547.309	637.543	638.556	549.858	559.321	539.519	624.759	500.259	458.654	166.79	311.099	1045.52	995.617	438.58	362.691	358.926	865.864	652.481	263.296	318.259	315.469	430.148	591.358	570.605	651.685	489.093	590	468.062	596.648	609.605	553.784	1140.89	513.833	527.481	330.543	734.37	816.333	631.383	300.259	404.889	315.815
Chr1	394824	396050	promoter	0.130575	540.543	507.679	972.889	1205.4	767.932	773.222	917.074	834.235	865.728	784.975	752.691	691.272	709.765	590.099	495.08	2105.51	2274.91	1172.01	803.543	808.154	1895.64	1150.81	572.383	771.074	764.198	838.716	777.951	768.543	931.049	656.679	714.333	871.117	1097.43	1212.17	1169.27	1940.35	787.167	659.988	572.988	1032.04	992.63	909.914	974.525	932.469	754.444
Chr1	400998	402685	promoter	0.130467	690.883	711.531	1289.81	1262.77	923.593	864.809	919.519	946.086	942.309	936.901	797.562	800.432	741.216	1085.02	1327.36	1766.91	1849.25	1792.65	1111.01	1424.85	1533.5	980.123	1055.91	1145.8	1087.44	1006.13	832.167	876.093	1453	1040.57	1023.73	1148.01	1231.54	1289.14	1160.81	2135.63	779.136	841.457	1049.31	1034.34	1004.36	953.636	1129.51	1109.12	1302.71
Chr1	404156	404894	promoter	0.198208	453.951	435.759	570.16	516.21	480.086	683.58	661.667	568.741	788.667	603.42	562.679	606.21	589.722	688.704	576.623	1025.41	1027.3	966.556	633.519	730.938	862.994	597.778	521.593	574.296	582.148	626.481	587.049	633.259	467.519	425.42	538.241	577.586	513.636	557.963	552	868.29	303.691	378.963	281.444	657.889	625.63	552.895	602.093	689.63	657.42
Chr1	408276	408987	promoter	0.270423	198.327	219.395	422.938	389.642	194.79	309.58	361	301.235	331.951	313.549	263.259	296.222	232.272	254.877	281.494	645.049	593.185	232.475	370.42	346.049	553.062	440.383	415.549	364.012	324.136	349.71	284.926	285.309	326.531	289.691	353.049	361.988	422.444	485.593	415.037	479.988	187.988	274.605	252.963	460.63	405.444	376.654	472.901	562.852	540.099
Chr1	410221	412039	promoter	0.191761	899.469	592.056	1611.93	1613.53	1061.52	1482.37	1579.27	1382.97	1463.67	1395.04	1240.09	1239.86	1334.12	989.605	1041.07	2201.8	2183.28	1218.7	910.951	1017.11	1753.38	1133.86	1447.45	1062.15	952.667	1187.81	1382.58	1395.68	1046.85	775.864	903.975	877.519	1224.9	1294.06	1166.3	1769.89	689.765	765.784	752.926	1154.11	1088.07	1010.77	1405.37	1439.15	1377.01
Chr1	414325	415655	promoter	0.131725	659.494	517.704	1475.49	1393.84	910.222	753.284	957.716	976.938	878.599	921.049	813.79	849.938	669.679	1080.03	1029.57	1973.85	1951.78	1670.04	996.531	1125.15	1824.49	1109.61	883.241	965.852	1004.36	1065.01	1043.28	1220.17	1237.2	862.66	887.84	1077.17	1386.09	1547.41	1470.7	2492.75	653.099	761.975	772.16	1620.94	1527.64	1553.99	1548.95	1655.03	1475.4
Chr1	417863	418994	promoter	0.161616	387.593	236.049	673.414	678.772	537.506	521.451	517.79	507.506	511.938	632.253	474.37	458.123	383.938	437.63	512.84	912.525	785.531	511.901	393.469	482.87	940.889	591.074	563.062	444.272	411.877	527.438	578.852	647.198	638.062	383.358	355.79	634.568	734.988	876.432	858.438	1196.36	484.136	441.043	256.012	1011.64	948.722	831.494	1628.88	1806.9	1760.96
Chr1	419782	420810	enhancer	0.171085	667.864	442.525	878.84	765.506	664.247	829.531	729.809	769.889	800	838.444	727.451	780.926	618.056	959.469	1309.62	1093.02	1111.51	1357.2	1342.98	1180.97	884.87	758.531	1309.27	1297.25	1182.05	962.049	443.247	475.506	584.907	495.519	484.358	449.074	593.457	640.907	577.667	551.42	313.877	375.012	313.346	494.296	366.864	373.914	785.691	729.136	827.519
Chr1	424414	425104	enhancer	0.190688	420.049	299.358	343.383	410.531	372.383	428.599	316.858	369.784	441.154	440.488	328.185	467.049	393.173	804.469	897.426	714.963	637.383	939.506	934.951	1027.7	548.438	397.444	724.123	888.895	913.809	766.914	310.642	330.938	378.191	327.759	249.636	421.401	455.346	448.5	464.827	307.432	220.395	279.37	239.117	339.642	326.864	332.747	606.185	540.84	639.099
Chr1	426140	427174	enhancer	0.144977	802.019	511.259	758.593	776.981	661.383	899.469	765.691	976.938	952.951	892.63	874	1047.52	799.685	683.296	809.13	1215.82	1250.46	1044.22	889.42	808.154	1056.9	813.333	819.309	995.204	1062.06	1274.38	563.852	736.296	1013.99	891.204	556.123	779.173	1157.22	1097.54	1184.47	1021.67	562.086	676.025	625.352	818.241	807.852	740.926	858.099	854.235	860.105
Chr1	428116	428818	promoter	0.251159	238.383	272.889	204.364	247.648	297.111	345.932	362.519	245.284	284.019	294.296	335.062	366.951	376.765	779.84	820.062	477.58	477.5	884.926	1005.94	1183.67	391.864	304.562	1477.25	1254.25	1133.22	935.543	157.29	130.5	182.543	189.142	215.901	218.568	119.741	145.062	150.574	169.395	117.049	110.753	121.235	199.185	163.469	145.654	399.593	356.21	489.42
Chr1	430632	431448	promoter	0.181611	597.852	410.309	577.556	429.056	461.667	780.691	706.222	778.222	826.901	797.006	830.148	930	904.716	1268.51	1362.44	777.506	798.444	1402.04	1478.43	1447.99	572	458.685	1523.82	1624.86	1561.75	1696.75	482.63	502.735	470.735	438.352	401.401	645.383	452.222	510.506	465.556	460.691	294.981	355.136	412.42	520.914	499.784	475.79	549.747	532.642	556.593
Chr1	433897	435118	enhancer	0.131201	824.006	449.691	935.247	845.395	783.37	1027.22	833	967.593	1049.84	1066.18	1080.19	1144.8	920.84	1331.72	1496.83	1237.26	1184.98	1631.22	1870.19	1718.52	973	721.315	1685.7	1613.01	1662.35	1696.75	616.204	677.858	635.432	609.864	591.475	870.346	500.79	540.716	517.864	731.148	399.111	486.123	392.988	583.086	553.574	492.593	1228.22	1157.09	1283.83
Chr1	436725	437848	promoter	0.164806	616.272	521.741	566.84	506.815	487.438	819.71	691.395	777.025	888.352	855.444	638.778	829.877	780.963	1032.22	1134.55	877.309	687.519	913.451	1316.39	1352.89	684.13	447.469	1267.91	1255.81	1371.63	1503.67	591.358	550.216	415.568	396.543	449.154	560.346	457.796	528.58	479.346	1724.75	456.019	378.963	419.802	525.593	610.068	589.864	869.84	952.389	935.086
Chr1	439714	440361	promoter	0.289352	188.519	197.438	250.932	294.975	275.617	324.617	293.506	319.531	307.877	385.049	371.074	273.741	412.16	646.506	586.877	458.821	508.506	553.574	694.025	543.296	415.685	171.383	676.272	571.352	566.79	559.593	284.926	263.136	286.056	282.025	303.864	267.21	289.691	332.235	288.019	464.173	181.907	153.111	201.481	293.556	219.617	243.784	390.975	428.216	489.42
Chr1	442724	443240	promoter	0.293586	208.259	133.71	228.981	249.185	183.735	337.642	279.506	256.593	322.79	295.167	342.765	325.037	360.988	450.111	311.099	288.025	254.673	470.975	492.358	482.87	224.84	151.247	406.765	445.148	459.321	446.556	190.42	205.84	160.605	159.358	121.617	178.296	171.148	208.488	175.975	230.79	117.679	135.352	169.395	290.728	284.16	252.012	334.926	320.519	325.037
Chr1	446193	447492	promoter	0.239795	499.049	177.654	695.938	642.259	679.907	522.765	500.469	523.222	663.79	681.963	507.864	500.259	529.753	1061.58	1038.22	518.895	597.031	884.926	1194.57	1128.12	455.228	290.401	904.123	1018.68	1174.85	1128.12	526.704	458.574	274.802	251.148	273.617	267.71	381.691	432.543	386.42	338.877	205.463	364.617	187.685	488.809	458.111	453.025	328.074	377.556	358.42
Chr1	447826	448282	enhancer	0.297042	130.105	79.679	139.117	120.722	164.383	181.191	160.623	192.877	210.136	204.716	198.235	160.605	170.012	263.16	277.185	183.321	194.691	325.012	158.333	274.136	186.852	129.432	285.259	240.395	282.444	220.327	160.858	200.167	103.926	99.5864	137.679	132.753	163.889	174.914	174.333	135.778	77.7407	103.037	77.6543	157.617	165.543	197.623	342.383	411.642	306.722
Chr1	452455	453512	promoter	0.171075	1038.72	1057.74	790.34	766.963	792.543	1207.83	1165.1	1131.33	1384.33	1319.28	1319.85	1225.46	1179.56	2159.14	2040.67	1545.41	1538.67	2923.15	2141.74	2415.88	1240.05	727.222	1713.47	1835.51	1616.93	1514.75	1066.23	1172.01	1822.12	1516.4	1516.73	1741.56	1289.14	1412.49	1367.31	1325.12	914.525	1361.27	1451.42	1226.54	1176.78	1373.81	1970.98	1929.43	2301.51
Chr1	455353	456009	promoter	0.257431	369.951	338.994	284.432	266.346	319	427.049	439.414	396.728	470.309	445.586	385	435.568	454.506	635.765	601.302	542.938	466.531	884.926	724.778	792.772	454.173	362.691	752.722	787.556	706.265	556.185	281.383	275.679	365.407	357.284	363.123	391.222	279.333	288.815	298.407	812.469	262.889	251.827	365.074	304.716	270.444	320.204	656.574	663.66	682.488
Chr1	458646	460420	promoter	0.194655	1976.95	1273.83	2459.75	2461.49	2350.08	1706.15	2037.47	1811.79	2082.93	1944.72	1845.6	1684.62	1772.84	2913.75	2860.25	1904.13	1989.62	3282.62	3511.33	3347.15	1585.35	1325.88	3296.47	3053.38	3400.75	2875.71	752.864	786.315	831.556	822.309	885.698	1238.25	612.556	697.006	613.543	1171.49	620.506	715.093	548.062	476.963	656.951	605.21	708.111	716.679	812.235
Chr1	460888	462162	promoter	0.124556	1648.96	808.765	1475.49	1337.67	1379.38	1435.12	1492.11	1470.77	1640.79	1770.47	1539.9	1493.98	1507.15	3238.8	2914.95	1862.44	1618.2	3234.18	3188.11	3581.94	1588.86	1103.84	3339.99	2950.63	2827.81	2402.58	812.728	802.346	1140.8	1050.77	882.358	1184.06	789.309	804.086	833.815	1004.22	679.432	844.617	635.086	597.593	643.272	648.463	1639.83	1488.58	1349.32
Chr1	463322	464104	promoter	0.22051	701.265	496.753	638.765	619.654	530.062	709.642	666.981	645.926	949.901	792.346	678.716	661.988	681.173	1080.03	1029.57	967.827	1051.09	1507.05	1225.88	1380.04	912.438	537.815	1322.54	1040.89	1072.26	955	644.827	666.173	699.636	584.407	528.827	779.537	563.975	669.87	696.278	681.599	459.265	674.549	495.852	482.025	540.593	465.019	853.889	821.568	943.926
Chr1	467622	469972	promoter	0.120847	3406.85	2174.67	3928.92	3747.9	3543.01	2973.95	3417.91	3199.59	3507.09	3809.58	3244.56	3253.47	2996.41	4568.85	4773.53	6037.05	6551.46	4490.01	5114.28	4979.45	5270.86	3297.09	3965.12	4387.58	4873.05	4859.17	2447.1	2925.12	4891.99	3913.64	3600.65	4910.05	3976.2	4374.94	4147.72	4817.15	3033.25	4009.53	3137.3	2673.85	2515.04	2456.17	2867.8	3015	2812.67
Chr1	471216	472469	enhancer	0.190354	1050.67	892.802	1152.57	1273.38	1055.56	1607.85	1731.12	1510.54	1771.33	1938.04	1402.69	1445.81	1573.64	1264.12	1341.2	1811.94	1671.61	1386.87	1730	1789.51	1429.25	1155.15	1597.2	1577.43	1678.57	1829.36	1893.95	1977.88	1362.05	1106.21	1131.89	1340.47	1225.59	1311.57	1300.49	1700.3	1238.25	1376.91	1237.66	1020.91	946.321	975.981	2219.56	2218.21	2197.25
Chr1	473228	474037	promoter	0.252871	756.568	662.173	649.938	550.346	666.951	742.074	1038.98	857.568	1017.72	1075.51	855.358	712.827	732.512	2058.63	2252.06	799.512	860.105	2420.28	2376.28	2762.64	632.815	465.556	1875.72	2180.3	2084.57	1730.35	303.778	463.29	343.247	498.148	519.037	385.889	204.383	221.401	168.864	255.827	252.617	396.778	357.753	167.79	241.852	260.901	353.037	295.438	297.321
Chr1	476332	476973	promoter	0.278841	485.698	288.457	522.198	353.148	421.864	470.605	488.481	521.123	584.432	668.907	601.074	456.284	558.691	967.938	1034.6	521.667	618.358	874.963	1262.83	1299.06	410.833	315.506	1620.01	1119.18	968.031	827.185	314.438	402.617	393.79	327.759	295.685	407.642	284.988	280.975	299.852	471.568	282.79	326.963	226.593	313.481	241.852	241.056	965.469	854.235	935.086
Chr1	478764	480311	enhancer	0.224133	1010.93	694.802	1032.33	1016.97	1213.58	895.012	1326.96	1153.36	1182.05	1326.09	1291.43	1007.62	932.537	2474.86	2632.95	1015.58	1051.09	2137.38	3072.28	3003.91	848.926	683.358	3043	2730.19	2848.91	2611.52	646.062	698.235	758.136	661.16	484.358	1176.54	586.025	630.827	602.512	636	533.068	552.593	494.994	367	342.383	349.685	2325.57	2229.02	2619.98
Chr1	480567	480940	promoter	0.304731	180.043	141.636	186.29	172.123	240.914	197.988	341.648	233.519	311.395	346.105	267.154	177.741	171.42	350.679	407.623	262.605	234.765	273.617	485.185	492.827	313.457	233.216	443.074	383.469	425.29	408.29	208.531	399.247	160.025	141.173	148.988	314.395	319.272	404.815	379.198	253.333	131.852	85.2716	90.1111	171.333	198.438	124.173	182.198	221.926	193.679
Chr1	482282	484328	promoter	0.156922	1946.4	1041.07	2004.46	2139.15	1794.73	1798.39	2194.47	1980.23	2277.32	2435.21	1976.38	2011.71	1606	3488.44	3704.52	3353	3241.58	4857.18	3593.41	4113.89	2988.04	2163.21	3614.7	3487.02	3465.85	3315.33	1747.23	1799.11	1969.36	1515.31	1346.12	1782.37	1813.01	2168.83	2032.9	2235.66	1362.05	1451.12	1089.43	1155.94	1173.73	1117.88	2863.75	3059.35	3201.17
Chr1	485441	486910	promoter	0.241371	2718.4	1124.68	1879.23	1903.98	1732.62	2211.9	2548.46	2304.42	2847.15	2607.96	2204.3	2182.23	2137.14	3649.75	3730.09	2139.9	2169.29	4126.68	4312.38	4036.48	1917.48	1422.67	3453.02	3540.36	3553.7	3623.46	2062.83	2374.37	1269.56	1229.49	1167.38	1053.44	1082.41	1294.06	1206.3	1664.62	865.444	1095.49	1017.72	892.543	899.636	974.099	1145.52	1056.23	1186.47
Chr1	487541	489670	promoter	0.169452	2891.57	1428.16	2600.27	2324.56	2138.69	2333.99	2530.88	2456.17	2658.88	2635.58	2257.95	2298.7	2256.62	2846.81	2912.04	3014.6	2961.27	3076.47	2765.81	2978.17	2653.6	2025.12	3335.44	2947.86	3332.94	3330.84	3522.52	3812.79	2499.2	2011.1	1889.72	2732.54	2880.69	2814.42	2700.85	2539.19	1686.96	1835.77	1593.73	2724.32	2829.19	2853.91	2551.59	2360.41	1904.81
Chr1	490501	491173	promoter	0.250301	530.012	446.179	395.383	351.642	260.938	458.284	607.228	478.093	685.611	619.395	436.037	448.531	430.883	900.648	1062.41	518.309	505.136	1201.98	1081.01	1228.48	411.327	378.191	995.79	936.346	987.025	966.049	694.568	699.667	472.432	441.247	360.117	459.667	506.481	503.42	494.099	689.63	384.099	566.086	329.66	448.63	459.63	424.025	790.321	885.049	1055.8
Chr1	492759	493870	promoter	0.132436	844.42	705.531	939.037	1057.52	981.093	1113.96	1220.72	1045.72	1350.35	1208.14	1052.27	990.975	955.506	1035.94	1217.81	1383.89	1210.9	1105.15	1281.88	1001.25	1141.83	738.988	1008.58	1008.09	1203.28	1199.16	1077.25	1147.12	1101.04	999.778	1020.51	1240.26	970.123	1085.91	1061.86	1094.78	769.383	843.037	734.525	888.062	1016.27	1000.01	1022.26	1157.64	1019.99
Chr1	496280	496567	promoter	0.301562	21.2469	30.4568	35.179	62.9074	29.9383	89.358	77.0123	64.9506	92.0864	117.889	53.0988	76.6975	106.864	113.815	92.2099	91.6728	66.7407	174.63	221.21	199.401	62.2593	34.9321	320.735	228.481	230.901	184.802	60.6667	52.1543	28.6728	72.0802	113.198	29.3025	48.2593	35.2222	39.7037	90.1852	27.6543	47.4815	61.1111	57.9938	40.8395	31.8025	71.8765	98.3457	74.1728
Chr1	498327	499367	promoter	0.119077	907.117	824.259	719.012	593.827	567.222	929.543	827.185	855.914	916.58	908.309	785.691	1137.1	741.216	1381.2	1630.23	1595.96	1403.07	1595.67	1647.37	1557.29	1211.95	878.556	1639.96	1703.16	1955.74	1654.36	616.204	594.321	821.531	841.167	917.654	845.309	742.136	730.185	741.568	719.969	432.16	511.679	321.704	729.136	675.519	685.58	1295.17	1180.67	1148.52
Chr1	501298	502740	enhancer	0.209362	404.778	361.506	657.123	529.506	477.963	536.741	514.012	581.395	634.346	657.056	449.136	614.914	479.667	1336.26	1220.99	684.963	657.309	1759.56	1096.27	1237.34	545.716	517	847.728	1158.04	1108.48	868.414	491.426	550.216	492.611	388.494	414.21	493.593	504.074	548.284	466.148	331.123	281.667	380.525	311.772	298.506	420.827	393.37	1022.26	931.148	1219.89
Chr1	504939	506309	promoter	0.270813	608.728	346.037	626.346	590.728	568.877	583.451	447.914	581.395	597.29	453.049	532.605	467.049	463.667	488.698	648.741	985.543	870.222	523.099	633.519	524.16	868.951	494.481	582.765	581.111	600.358	746.796	407.636	408.173	515.401	436.802	335.111	527.969	664.914	681.346	705.531	585.105	400.173	396.778	284.975	367	372.864	335.642	504.506	574.068	522.494
Chr1	508083	508283	enhancer	0.304711	62.3827	46.2469	39.4198	50.2099	81.1728	59.5556	39.0617	48.0864	74.8457	59.0123	87.4506	64.1975	60.4938	97.9259	96.6605	39.7654	20.8765	49.9753	93.1728	64.8148	32.0741	49.0679	37.3025	39.8148	38.9012	72.0123	27.3333	44.2346	65.1481	63.5556	47.7099	53.6543	64.0679	69.6605	61.7469	26.7407	48.1358	52.784	66.4815	22.0741	14.6543	22.9012	165.914	132.667	204.056
Chr1	510907	511558	enhancer	0.270022	199.444	123.63	222.722	256.049	271.667	315.969	333.531	296.543	352.901	282.235	282.136	326.111	278.247	412.537	443.148	501.562	538.957	691.241	574.66	482.87	405.932	257.444	371.42	424.185	417.272	426.395	243.136	240.321	301.963	273.889	322.333	319.457	423.253	447.877	442.889	333.519	142.235	228.346	100.778	334.123	392.222	282.272	553.407	532.099	722.142
Chr1	515178	515932	promoter	0.160895	878.914	688.944	622.889	633.988	493.809	1060.8	873.568	888.938	1125.67	972.136	858.383	885.148	830.784	657.123	749.481	810.099	736.049	791.975	742.136	755.654	711.753	499.519	873.938	863.617	972.346	977.58	1010.33	981.519	928.957	884.617	1064.06	938.907	724.315	863.401	815.543	1780.85	614.265	780.42	822.031	823.457	676.852	708.926	794.407	846.846	935.086
Chr1	516362	518474	promoter	0.164807	1560.4	1088.01	2200.27	2287.94	2035.92	1676.42	1746.4	1857.25	1956.05	1864.96	1999.14	1699.81	1669.06	1946.4	2065.23	2513.72	2381.9	1962.9	1819.88	1904.13	1796.44	1276.6	1812.07	1747.23	1913.4	2061.96	1516.14	1588.65	1772.38	1495.43	1667.28	1643.93	1557.19	1690.02	1586.36	1718.16	1203.98	1371.82	1235.09	1276.6	1052.07	1000.01	3098.87	3125.07	2853.52
Chr1	519294	520077	enhancer	0.293813	264.84	238.58	570.16	564.198	230.056	332.043	303.907	306.981	292.605	350.247	240.093	225.914	253.84	166.79	222.914	808.049	910.92	311.772	354.66	259.951	800.642	576.37	336.488	252.198	404.012	287.259	286.056	266.84	130.309	139.883	118.864	276.654	265.568	295.827	292.074	445.123	175.426	144.432	53.0864	322.272	344.049	403.58	285.667	281.691	342.222
Chr1	521507	523009	promoter	0.117556	1201.5	1134.02	1645.86	1588.65	1576.57	1225.8	1161.23	1051.02	1098.78	1201.91	1219.41	1156.49	1014.77	2223.56	2039.55	2569.69	2843.64	2684.38	2271.56	2364.14	2182.86	1470.64	2711.59	2563.46	2758.08	2480.17	607.821	833	1250.85	1117.92	1184.47	1256.09	1353.84	1495.91	1324.38	1726.56	560.099	695.802	734.525	964.994	927.358	796.951	2609.13	2435.98	2781.52
Chr1	523246	523746	promoter	0.295617	146.006	102.852	207.148	165.519	255.71	158.444	148.543	142.617	163.488	144.321	206.13	168.617	194.284	357.815	355.704	143.568	149.963	532.988	547.438	618.691	110.321	81	495.444	510.914	448.568	384.099	53.963	86.7222	90.7037	86.8395	62.0741	86.4753	62.3395	43.6852	71.5679	117.074	49.0926	81.8025	19.6481	61.5432	10.8951	40.0864	236.377	228.457	193.679
Chr1	528785	529577	promoter	0.264098	231.895	167.556	226.167	185.963	247.988	275.074	201.914	210.457	252.346	224.574	270.444	265.247	228.784	559.642	496.617	182.074	256.642	394.296	492.358	456	133.395	156.494	480.272	416.58	349.735	319.099	106.136	94.4321	183.778	156.562	147.519	138.605	106.889	138.568	107.37	63.1728	89	113.605	61.1111	104.79	49.8765	106.636	675.012	647.111	820.272
Chr1	536692	538182	promoter	0.120899	923.296	862.747	824.049	932.136	730.123	934.735	1080.67	935.037	1089.22	1038.46	856.654	944.123	813.883	1316.06	1338.79	1758.9	1548.38	1744.96	1741.56	1665.73	1394.02	992.759	1350.73	1580.59	1688.48	1543.89	875.58	884.87	1203.93	904.012	1091.67	1282.8	1116.76	1167.97	1188.73	758.321	807.056	862.605	855.84	953.481	919.062	902.006	1408.46	1469.44	1580.11
Chr1	539743	540493	enhancer	0.251115	148.531	133.71	189.284	198.383	143.123	197.988	203.883	183.753	235.877	225.148	209.42	172.426	223.667	313.444	256.574	219.914	232.37	189.556	378.432	316.475	148.395	151.247	272.642	263.148	304.259	239.37	141.21	179.222	134.272	147.272	128.846	171.179	197.951	181.42	198.623	212.309	105.407	170.654	144.37	164.673	146.605	179.728	517.593	484.198	665.938
Chr1	544244	545114	promoter	0.299142	152.846	102.852	125.512	123.37	106.025	245.963	219.019	213.111	222.63	251.574	174.068	187.994	167.358	365.062	368.216	111.284	92.3519	562.914	639.179	618.691	78.8704	60.2222	457.173	450.568	352.315	439.543	162.765	203.815	172.938	199.056	173.92	120.142	156.278	138.568	168.864	152.778	145.525	197.704	144.988	104.79	44.2222	103.333	440.031	358.556	548.438
Chr1	552212	554438	promoter	0.121017	1623.83	1344.46	1538.07	1463.95	1280.8	2051.52	2137.63	2020.27	2259.62	1858.95	1701.49	2177.5	1488.58	1449.3	1571.9	2126.23	2274.91	1341.78	1527.88	1456.14	1868.8	1338.3	1664.62	1537.31	1519.34	1633.4	2180.3	2093.65	1704.23	1236.91	1439.56	1420.93	1644.13	1537.67	1482.27	2553.16	1485.89	1833.58	1935.51	1367.41	1317.83	1268.27	2635.58	2642.85	2840.88
Chr1	554868	555527	promoter	0.259001	434.407	399.346	322.809	300.265	381.469	306.938	355.735	293.383	388.346	325.84	338.741	330.784	311.951	754.062	941.654	370.741	341.975	874.963	934.951	932.136	307.691	260.358	818.111	761.747	968.031	735.778	282.951	379.963	438.086	308.444	222.259	394.056	278.136	371.167	369.407	489.685	293.506	495.444	324.753	423.481	364.981	315.136	1478.43	1305.74	1667.64
Chr1	555893	557505	promoter	0.161244	1189.59	841.401	1534.37	1369.52	1482.08	1505.77	1355.12	1314.91	1378.17	1261.9	1316.44	1428.49	1215.63	2189.89	2305.54	2038.54	2309.57	2467.38	2431.36	2458.69	1708.65	1252.27	2515.04	2383.85	2570.94	2501.98	1485.59	1789.65	1967.02	1657.67	1744.43	1506.67	1593.17	1834.86	1745.72	1213.43	1288.25	1804.73	1277.93	1229.38	1158.27	1090.36	1561.14	1496.06	1682.78
Chr1	558469	559170	enhancer	0.294822	347.809	286.346	429.728	479.136	414.383	389.278	389.259	369.784	457.265	359.568	258.914	363.87	302.741	759.735	636.562	574.519	597.031	532.988	627.512	570.086	458.296	321.123	454.315	484.58	420.08	534.13	254.383	319.759	372.79	323.784	358.42	315.136	374.926	374.37	387.111	523.321	317.432	356.747	264.068	296.062	264.79	248.889	541.975	544.84	648.556
Chr1	559472	560573	enhancer	0.255739	714.086	410.309	752.34	660.994	631.889	682.111	512.926	700.759	755.074	573.944	599.691	838.642	662.395	1445.11	1105.28	636.123	666.765	501.012	581.568	427.543	341.432	287.407	413.679	398.728	388.383	426.395	686.87	895.395	884.136	954.198	1138.69	763.37	915.809	1007.07	1005.52	399.593	638.667	1141.34	708.852	287.932	333.58	317.833	565.864	557.333	514.062
Chr1	563665	563991	promoter	0.299034	117.889	115.605	128.074	135.642	118.623	221.852	160.623	211.679	300.741	231.012	240.093	269.963	217.364	418.642	375.926	138.432	172.679	159.722	124.123	178.691	104.21	90.2593	190.185	151.741	117.296	128.475	260.79	408.173	168.179	212.235	174.914	132.753	187.432	183.444	168.012	245.531	135.765	256.938	214.407	54.3765	101.321	89.0741	444.537	478.877	842.284
Chr1	564310	567453	promoter	0.163283	3033.69	1726.86	3797.99	4519.48	3249.91	4445.49	3849.17	3997.6	4748.17	3729.16	3565.86	4186.76	3463.05	1622.42	1660.88	6341.65	5817.14	1768.86	1554.7	1265.88	5282.44	3450.98	1875.72	1755.77	1933.8	2787.63	5060.43	4812.35	4352.05	3469.19	3549.52	3222.85	4667.23	4771.59	4797.96	7339.37	3429.19	3633.21	3068.99	3072.28	3184.46	3078.11	3318.94	3766.33	3075.62
Chr1	568261	568549	promoter	0.293201	186.605	95.3086	148.395	151.543	138.815	242.327	212.741	150.444	281.383	213.753	254.494	203.957	212.821	391.988	306.84	162.253	213.765	159.722	230.852	282.84	199.093	114.562	276	243.42	212.086	261.043	240.556	416.025	350.673	277.185	283.432	257.364	298.198	319.099	287.327	309.907	171.667	238.877	284.185	290.728	272.142	269.253	513.154	418.667	403.975
Chr1	569083	569513	promoter	0.301639	258.358	202.037	399.321	342.451	275.617	534.13	458.975	327.16	564.802	459	369.84	365	407.66	206.642	256.574	763.605	698.877	232.475	250.025	390.784	669.074	407.636	414.494	306.667	315.469	401.253	665.556	618	327.185	253.16	205.049	463.926	475.753	584.685	492.012	921.383	248.92	339.704	242.654	510.895	385.975	381.389	359.667	323.914	271.975
Chr1	571086	572607	enhancer	0.243362	1135.02	499.753	1126.01	1061.35	993.617	1499.63	1783.32	1784.57	1779.15	1622.68	1353.84	1646.43	1213.26	1339.93	1315.43	1180.86	1330.32	1019.2	1035.83	1070.93	918.457	732.981	1208.63	1083.36	1036.4	1285.78	2613.08	3162.31	1662.62	1684.42	1685.57	1212.67	2081.49	2025.77	1952.07	1039.27	1195.67	1823.65	1780.05	1151.99	1237.42	1193.77	1731.95	1700.02	1704.89
Chr1	574843	576555	promoter	0.158602	2818.52	1217.11	1830.95	1844.87	1616.3	2391.37	2209.3	2147.38	3054.48	2884.86	1754.41	2057.5	2067.46	2022.88	2047.88	2578.36	2078.53	2051.76	1982.07	1889.57	2173.4	1422.67	2262.56	2167.19	2811.22	3315.33	3061.74	3483.09	1750.75	1664.36	1564.46	2022.88	1881.44	2124.64	1968.22	2779.46	1974.16	3335.44	2401.2	1782.22	1670.04	1676.17	3009.26	3175.3	2478.94
Chr1	580234	580886	promoter	0.227038	389.494	416.457	498.037	430.698	342.148	544.333	555.272	488.951	593.506	605.185	421.111	429.475	421.284	444.173	425.802	1071.33	1098.53	449.877	471.988	604.753	962.426	765.802	602.049	535.654	556.049	507.864	489.173	466.617	540.025	463.099	448.827	617.778	721.383	771.309	712.383	969.043	289.37	309.753	276.451	569.358	641.636	541.642	517.593	579.605	590.975
Chr1	581749	582748	enhancer	0.269659	348.519	281.84	546.062	567.42	444.019	407.438	412.963	357.543	472.444	446.623	375.864	420.71	340.679	488.698	557.444	754.895	684.16	737.185	712.667	675.778	649.296	467.938	479.173	565.37	600.358	552.383	444.259	422.889	388.679	357.833	320.222	409.012	486.185	470.728	445.914	401.926	329.469	299.037	200.827	391.951	371.167	357.117	541.975	587.377	796.086
Chr1	583561	584537	promoter	0.117076	731.481	764.642	745.284	739.167	759.605	968.136	1136.69	916.432	1056.05	1049.17	912.58	823.457	881.198	1089.72	1148.84	1817.01	1691.48	1420.28	1199.66	1196.49	1344.6	1011.52	1215.96	1197.88	1383.17	1143.96	901.099	910.543	1003.64	820.79	989.025	1024.26	1126.56	1119.78	1130.78	735.673	537.012	543.222	558.049	813.481	745.401	807.63	1100.09	1164.01	1263.62
Chr1	590645	591919	promoter	0.141293	1380.36	808.765	1210.01	1199.1	1047.04	1154.23	1032.25	1226.4	1402.89	1163.69	1061.64	1426.43	1116.72	1244.6	1138.58	1435.01	1490.22	983.728	830.951	811.099	1249.57	921.827	1079.93	816.994	970.198	811.981	482.63	536.858	948.809	845.568	718.093	558.049	615.549	564.988	657.932	543.099	520.198	668.481	584.926	404.654	426	393.37	1666.33	1577.73	1580.11
Chr1	593158	593848	enhancer	0.29003	197.395	149.963	210.21	226.148	227.914	217.92	198.383	238.84	344.815	226.617	232.284	201.938	228.784	238.704	268.636	374.111	334.395	204.333	258.969	167.568	226.741	106.617	209.506	185.136	177.944	192.593	270.519	192.747	240.617	183.494	160.346	161.809	207.58	232.617	227.735	176.938	178.074	153.111	165.235	248.056	178.648	141.889	517.593	438.358	358.42
Chr1	598446	599184	promoter	0.170279	371.667	385.34	419.481	413.426	367.019	524.222	394.79	441.395	404.778	502.16	416.019	406.185	378.074	635.765	731.87	593.012	594.864	653.938	874	831.778	525.284	375.222	592.858	759.247	805.809	727.685	325.216	347.938	517.556	450.568	520.074	520.383	439.747	586.926	503.222	547.395	286.457	218.389	220.852	348.154	439.043	405.599	1216.6	1295.83	1283.83
Chr1	599400	599887	promoter	0.294804	99.1605	108.173	192.747	159.488	193.741	224.457	145.716	160.877	161.975	174.852	161.296	160.605	151.907	462.469	340.562	171.605	131.451	449.877	534.247	509.321	161.469	95.0864	613.981	412.79	341.37	349.71	124.667	128.438	152.574	118.556	144.481	92.1914	101.537	97.2099	77.5494	127.611	84.6914	91.9136	79.5926	104.79	103.821	35.9012	251.969	263.074	350.272
Chr1	601812	602843	promoter	0.218328	1104.59	813.617	1049.31	1022.4	932.259	969.963	1112.54	962.531	1125.09	1026.79	936.179	958.753	986.969	1762.13	1743.84	1947.88	1721.91	1912.12	1780.66	2058.3	1785.17	1257.28	1703.16	1817.63	1843.27	1387.12	738.093	918.716	1246.43	1042.51	1098.53	1244.54	1098.41	1264.72	1203.93	921.383	880.5	900.296	931.111	1160.67	1158.27	1046.64	1336.77	1418.46	1548.62
Chr1	607089	608240	promoter	0.204397	386.173	474.432	467.728	446.012	390.136	693.481	431.111	495.802	559.84	532.5	556.401	606.21	515.642	418.642	476.407	421.506	389.031	232.475	346.247	371.383	306.722	202.062	524.469	421.401	279.235	290.759	483.642	464.963	525.877	385.105	423.469	330.84	340.562	378.994	344.247	668.852	355.673	419.395	326.938	383.117	399.074	352.284	1035.54	1025.9	1234.65
Chr1	609203	609771	promoter	0.296574	352.858	317.469	241.556	209.259	233.284	391.63	328.012	342.932	431.5	355.778	369.84	402.241	338.346	399.222	417.525	361.136	336.426	246.877	444.16	420.296	373.519	263.136	152.426	340.506	324.136	401.253	299.16	378.025	317.031	280.284	264.951	334.154	289.691	305.401	321.543	220.037	277.315	338.123	396.636	264.321	306.815	255.383	375.901	363.259	413.056
Chr1	616123	618467	promoter	0.153377	2715.86	2159.14	2189.01	2314.52	2163.01	1960.4	2848.46	2514.05	2590.72	2685.4	2480.47	2396.49	1894.06	3642.67	4189.86	3721	3543.59	5130.18	4821.58	5135.04	3345.23	2847.49	4488.28	4458.8	4324.44	3724.21	1330.12	1487.4	2490.04	2124.81	2179.58	1782.37	1824.04	2030.92	1966.56	1963.66	1440.31	1395.14	1294.39	1483.23	1477.61	1553.99	2016.67	2098.9	1995.83
Chr1	619807	621762	promoter	0.196395	2800.8	1859.95	2700.46	2497.09	1908.69	2458.14	2621.38	2355.89	2737.27	2730.19	2115.26	2262.8	2027.91	2072.35	2242.03	4586.04	4573	3092.97	2202.6	2343.09	4410.85	3232.42	2668.42	2402.06	3101.3	2646.56	1951.06	1798.28	2583.59	2138.22	2207.47	2213	2170.85	2241.73	2259.1	4201.72	1584.8	1956.05	1841.11	1584.28	1740.89	1830.62	2604.11	2765.48	2666.95
Chr1	622791	623559	enhancer	0.305044	208.259	100.21	213.586	165.519	156.21	168.691	195.802	182.543	198.957	206.778	235.914	198.728	191.753	306.111	357.815	172.735	155.988	361.216	337.92	338.716	136.636	101.864	661.235	326.747	354.704	301.296	355.543	358.988	418.16	220.691	251.185	321.728	271.21	250.37	266.883	506.235	356.728	401.556	334.654	530.37	466.198	473.519	264.481	266.185	315.815
Chr1	625454	626140	promoter	0.222645	344.16	323.815	660.691	565.852	473.698	390.414	501.864	419.444	513.654	476.901	322.623	410.877	339.475	759.735	488.235	1107.37	991.827	1136.57	724.778	826.556	1035.94	786.519	620.049	548.852	629.444	571.173	416.42	419.235	586.877	438.827	360.802	573.21	672.914	771.309	767.13	702.636	354.148	318.228	213.568	708.025	739	631.383	569.796	621.512	614.963
Chr1	626449	627057	promoter	0.295188	370.84	334.951	350.457	369.222	288.198	333.611	369.58	335.79	372.827	426.599	259.87	327.111	357.784	284.963	331.784	439.395	401.142	501.012	436.938	350.154	399.395	293.488	458.259	419.204	559.198	404.457	295.123	263.136	285.395	260.938	336.278	327.401	328.877	400.549	338.321	523.321	251.549	245.716	191.488	358.265	284.16	287.969	331.21	358.667	297.321
Chr1	629579	630671	promoter	0.23331	534.531	438.049	653.481	622.543	480.086	535.457	548.086	543.667	519.494	505.642	469.426	543.296	413.407	541.383	509.259	705.321	748.216	613.296	478.586	534.531	560.407	402.753	1144.02	639.519	662.531	453.358	545.815	572.444	601.395	563.759	628.716	869.407	499.753	566.173	554.525	917.907	394.556	346.389	435.568	313.481	325.037	285.025	590.179	553.191	472.395
Chr1	633122	635498	promoter	0.16368	1918.51	1210.3	1463.01	1304.65	1384.16	2007.17	1796.15	1878.85	2297.74	2095.37	1918.67	2147.95	1946.54	2597.71	2863.35	1522.8	1640.63	2891.32	2837.9	3285.32	1063.96	1014.16	2391.81	2766.26	2490.04	2637.44	1511.35	1478.02	1382.81	1447.27	1277.51	1190.43	964.642	1084.63	1030.17	1001.85	1060.59	1404.81	1321.72	537.21	531.407	593.963	656.574	736.37	796.086
Chr1	636135	636667	promoter	0.294354	125.753	110.765	234.63	202.568	210.012	225.809	241.438	229.272	201.846	215.037	160.012	174.333	222.383	263.16	283.79	319.907	274.778	511.901	519.259	629.099	280.586	276	663.481	615.136	494.407	446.556	155.648	126.469	103.346	131.802	139.623	127.407	85.3951	133.37	98.2963	161.37	99.7654	98.1667	43.4938	112.173	99.0741	82.1975	66.4136	104.765	74.1728
Chr1	638660	639003	promoter	0.288994	247.753	350.673	114.519	76.6543	207.679	345.932	243.222	223.667	369.407	321.549	232.284	264.241	300.506	159.383	146.222	285.926	240.481	174.63	124.123	209.753	261.698	190.654	137.778	167.111	152.981	204.272	268.111	313.815	202.741	187.827	198.488	255.031	249.086	243.136	258.148	359.778	211.395	221.802	189.889	267.321	221.654	203.815	232.037	230.333	333.753
Chr1	641534	643146	enhancer	0.249896	545.506	451.753	811	732.006	649.253	600.198	691.395	695.938	668	661.691	661.469	608.765	667.204	565.543	681.852	821.951	794.84	691.241	945.605	602	619.395	555.21	1020.22	826.475	798.519	746.796	640.704	547.642	398.938	314.185	370.444	395.5	433.309	454.506	460.247	555.309	574.272	447.877	400.753	467.747	389.012	325.16	716.086	705.309	607.5
Chr1	644240	645521	promoter	0.144821	796.5	583.469	905.889	900.821	1022.7	956.815	1070.07	990.228	1232.51	1186.69	1036.36	925.654	1107.86	929.512	988.457	1023.65	883.833	1044.22	1357.46	1286.2	793.63	657.852	1123.98	1243.1	1313.94	1556.12	984.025	1027.54	738.914	676.043	629.136	719.568	607.901	619.728	703.815	975.667	623.944	751.753	673.432	633.272	612.679	534.074	853.889	885.889	959.302
Chr1	651854	655654	promoter	0.13972	3760.47	2027.1	3292.07	3308.75	3545.37	4254.21	4014.31	4293.83	4602.77	4249.3	4082.16	4251.93	3738.89	4374.94	4362.44	3634.12	3849.17	3526.27	3766.33	3920.86	2759.27	2557.98	4382.46	3549.52	3814.72	4231.1	2747.1	2984.59	3318.32	3554.47	3356.85	1702.9	2312.23	2448.2	2499.98	2237.84	2363.34	2933.02	2215.11	1365.16	1289.81	1143.35	1952.66	2129.56	2031.47
Chr1	658057	658897	promoter	0.249945	662.519	605.154	409.58	446.012	529.123	463.926	546.457	501.864	504.136	585.642	483.852	444.84	498.802	1398.59	1423.66	878.321	925.556	1702.23	2061.96	1907.69	787.389	613.117	1661.67	1779.38	1573.86	1187.81	323.407	340.63	496.605	694.951	629.136	367.037	317.735	369.389	346.574	366.333	433.086	385.309	261.84	261.519	232.926	320.204	356.377	310.759	342.222
Chr1	659609	660447	promoter	0.244674	250.765	519.759	347	264.377	352.241	380.784	606.932	431.5	332.58	472.444	345.253	245.907	290.759	651.981	728.821	875.265	868.29	974.901	1058.33	1155.69	831.994	730.142	1416.48	1147.91	1115.33	1068.63	402.87	568.877	330.877	843.321	813.333	259.099	293.617	275.296	296.963	350.531	352.364	210.432	222.16	241.691	282.309	364.981	137.519	146.5	151.228
Chr1	661155	661355	enhancer	0.303489	51.8086	49.5185	67.8519	38.216	62.716	37.8889	70.3333	61.2346	79.7716	61.3333	67.6852	47.4815	75.216	144.543	115.272	69.5185	70.284	174.63	268.383	215.42	67.5864	53.3827	223.815	258.191	215.191	157.747	92.7407	88.6296	48.6358	83.6173	97.3704	16.5864	42.5802	17.1111	31.5062	50.4691	46.7963	16.4259	55.8765	72.4568	85.6296	55.7901	27.216	28.2593	17.6481
Chr1	662115	662931	promoter	0.184944	361.198	377.222	471.444	430.698	571.728	408.58	505.605	539.031	447.988	509.562	412.815	398.037	310.698	635.765	879.222	684.42	729.852	904.198	1139.68	1097.28	593.012	455.784	1081.05	1091.67	1052.2	1202.94	752.864	841.562	585.877	917.716	964.994	491.84	786.395	693.636	816.426	373.247	530.753	318.228	440	839.037	795.556	859.704	456.247	460.877	386.315
Chr1	669506	670115	promoter	0.291906	287.444	212.031	241.556	168.049	202.568	332.043	300.358	259.309	339.117	312.086	300.13	245.907	263.296	399.222	437.63	463.519	445.66	501.012	354.66	531.383	445.716	276	258.611	360.37	367.642	356.877	388	401.006	295.802	323.784	381.716	367.037	448.049	468.438	431.802	314.704	346.815	364.617	329.66	391.951	357.852	367.198	363.92	326.272	367.617
Chr1	670977	671192	enhancer	0.299208	20.0988	11.0494	25.2901	21.3086	20.179	50.7469	15.963	16.0864	57.9506	53.2346	41.1975	37.2593	53.2716	74.679	43.6667	8.34568	7.70988	76.1235	41.5185	59.9753	10.2963	11.5556	14.3951	20.8765	27.8272	25.4938	31.1481	60.3395	9.32099	8.49383	12.1914	10.5802	10.4198	11.6728	7.70988	10.1728	13.9383	39.7901	44.5309	13.2037	17.9753	6.75926	55.7778	21.8272	47.8025
Chr1	672581	673563	promoter	0.142702	810.068	521.741	536.352	562.556	566.13	815.679	601.506	688.642	822.562	780.543	742.691	720.105	722.142	1032.22	986.691	1103.84	1206.37	746.815	996.531	903.895	936.074	676.025	582.765	814.889	868.815	1038.22	534.716	707.321	694.969	748.216	541.901	929.272	943.654	869.247	964.42	838.414	589.37	782.815	669.846	633.272	627.068	567.975	798.358	874.142	1019.99
Chr1	687000	687885	promoter	0.2644	400.778	253.506	267.691	246.086	416.716	236.741	197.833	253.302	276.241	242.525	262	271.086	310.698	306.111	405.889	210.79	213.765	481.006	464.852	452.309	156.506	116.827	412.574	397.827	481.457	484.901	202.957	207.673	379.136	421.321	478.247	320.235	259	268.185	302.457	314.704	452.111	343.025	392.988	150.444	170.086	271.778	637.216	629.333	738.093
Chr1	692303	693208	promoter	0.280274	400.191	322.049	222.722	269.494	363.148	269.519	226.765	326.747	307.877	356.432	301.963	294.821	330.117	372.037	372.136	329.827	340.302	371.938	393.469	346.049	181.272	207.636	222.63	234.531	349.735	279.926	295.901	340.63	421.642	435.111	381.29	345.309	330.5	308.247	336.877	406.642	483.63	449.506	317.883	293.556	200.975	246.185	637.216	588.975	657.42
Chr1	700890	701768	promoter	0.12566	810.068	1067.65	699.025	669.846	791.049	689.37	769.815	786.741	818.883	841.765	660.29	681.086	741.216	612.488	1007.27	1639.1	1679.45	1186.81	967.827	1079.31	1488.58	1075.44	972.852	1047.62	1171.73	1199.16	802.704	850.574	1046.47	1205.64	1170.72	1056.9	1256.94	1373.04	1332.92	1996.2	848.691	778.642	683.778	992.864	1004.36	1106.15	961.037	1080.67	877.08
Chr1	704410	705270	enhancer	0.267031	501.086	456.136	480.469	546.667	475.753	562.914	512.593	588.654	624.37	565.309	589.457	535.173	580.716	379.025	498.611	632.117	657.309	427.71	401.222	330.34	486.765	321.123	432.407	357.543	326.889	326.975	367.352	404.395	349.272	331.901	257.593	221.488	190.642	248.031	189.037	440.704	385.321	261.969	293.506	202.802	235.049	223.364	609.778	605.049	582.84
Chr1	706302	707688	promoter	0.109409	1476.05	1253.33	1444.19	1480.28	1415.59	1140.45	1311.36	1347.31	1481.99	1361.37	1321.35	1475.7	1173.77	1641.17	1577.67	1939.3	1973.02	1816.18	1571.98	1519.02	1373.36	1216.93	1335.98	1395.14	1561.75	1749.05	977.025	1196.78	1512.87	1838.59	1861.58	1435.2	1642.93	1553.99	1803.44	992.926	1190.96	1284.69	1344.12	859.432	865.117	773.414	2262.05	2201.8	1833.15
Chr1	711941	712302	promoter	0.291634	92.6728	74.5309	35.179	43.7778	66.5185	79.8148	53.7037	77	83.8704	92.0988	87.4506	68.4321	102.84	74.679	100.802	48.2716	37.0617	118.185	221.21	113.704	42.1235	18.9259	53.4136	85.3457	74.6296	85.716	79.9877	94.4321	134.784	137.914	164.654	107.79	104.377	107.068	115.488	63.1728	123.123	122.623	132.049	47.4383	91.4506	78.8704	108.969	107.228	101.21
Chr1	713360	713589	enhancer	0.303067	18.9877	55.4198	72.7037	86.7531	71.037	43.9136	56.5926	59.6235	36.6852	42.9074	54.4506	48.8765	42.2963	24.463	51.3765	137.988	99.4568	89.8025	29.5185	54.9877	122.377	116.827	64.7099	74.9383	52.1728	85.716	46.321	38.2469	52.3333	48.037	52.6667	44.037	45.9753	51.7222	41.2222	87.2901	20.6543	16.4259	56.7284	65.1728	80.6235	40.0864	44.4753	76.6358	74.1728
Chr1	727042	729203	promoter	0.1429	1382.81	998.58	1665.07	1512.12	1648.06	1352.09	1437.56	1355.35	1594.48	1546.96	1413.41	1520.36	1222.99	2072.35	2117.8	1808.62	1831.56	2858.96	2669.43	2708.69	1258.75	1224.16	1815.36	2449.07	2343.4	2950.63	1139.56	1193	1233.78	1684.42	1636.07	1362.92	1144.75	1194.14	1257.16	724.975	1194.65	1446.36	1462.56	850.821	816.333	754.148	2358.59	2101.06	2428.78
Chr1	729488	730184	promoter	0.256404	258.901	246.185	477.481	509.802	414.383	247.111	272.031	249.79	253.728	253.691	219.358	228.025	209.895	328.802	353.698	529.827	565.741	311.772	492.358	448.5	498.679	355.272	405.926	340.506	471.21	411.926	177.42	228.63	303.883	285.981	235.012	428.685	368.667	438.222	417.148	591.815	181.907	156.136	220.852	394.377	382.272	403.58	648.691	686.802	622.975
Chr1	737712	740262	promoter	0.216699	2846.81	2107.84	3090.19	2870.06	2941.56	3292.52	3061.74	2940.79	2970.77	2782.84	2829.92	3540.36	2637.44	4037.49	3862.6	4402.22	4610.17	4471.45	4440.18	4716.65	3527.12	2995.02	3839.6	4086.88	4009.53	3856.49	1934.11	2104.33	3637.54	3166.84	2903.09	2652.17	2540.6	2780.33	2663.56	3099.28	1991.59	2442.3	2141.54	1999.96	1827.41	1883.47	3548.77	3541.3	3149.84
Chr1	741903	742181	enhancer	0.305049	31.9753	30.4568	103.593	58.358	54.0864	133.963	115.469	92.4136	75.4691	64.6049	58.0247	103.58	73.7222	43.358	56.1728	76.6543	81.2346	103.821	72.8519	75.5494	63.5556	74.3827	84.679	69.321	52.1728	67.5926	76.1975	86.7222	191.444	102.333	81.0123	53.037	51.037	95.7901	91.4568	209.494	76.6728	80.1543	113.543	94.5309	60.0556	67.2469	32.5123	66.7901	74.1728
Chr1	744059	744755	enhancer	0.305058	105.086	95.3086	151.506	183.173	141.981	548.438	346.136	315.383	238.025	231.79	160.012	521.42	302.741	121.031	117.043	202.568	192.667	204.333	180.043	183.975	148.926	162.877	215.463	164.735	170.667	157.747	188.265	246.111	339.914	157.346	154.198	109.593	314.025	251.383	220.506	414.877	185.963	207.29	233.173	120.395	132.049	152.512	148.148	181.42	101.21
Chr1	746325	747203	promoter	0.292037	236.019	197.438	216.772	202.568	141.981	356.617	299.29	259.698	243.383	264.012	267.154	332.951	248.802	238.704	214.457	238.765	198.198	232.475	240.481	346.049	178.685	126.617	254.29	233.198	205.568	172.981	252.605	307.074	236.963	180.537	202.537	235.728	317.735	322.667	327.648	227.988	269.185	208.963	224.407	212.63	241.852	232.333	460.444	375.463	497.247
Chr1	747892	749502	promoter	0.156125	582.062	649.42	899.272	891.815	710.556	729.019	895.512	738.148	780.222	714.938	726.111	686.469	626.63	859.568	922.074	1244.75	1172.91	1315.99	1121.04	1017.11	992.086	860.728	1273.74	1113.32	1002.25	1081.34	732.512	728.704	1043.59	912.099	831.815	979.506	1032.96	1146.36	1105.06	969.043	555.272	605.889	617.049	674.605	715.988	693.938	1202.07	1333.35	895.247
Chr1	751871	752436	promoter	0.287993	151.883	85.0247	136.185	193.963	151.883	153.309	161.809	163.901	181.753	172.123	121.901	151.667	128.475	263.16	258.611	204.198	198.198	204.333	180.043	189.247	221.111	137.284	149.395	133.679	185.074	196.475	137.309	190.778	252.247	194.136	342.988	263.099	187.858	223.309	230.309	305.352	154.84	190.463	114.796	282.352	185.062	169.395	549.747	520.543	548.438
Chr1	753168	753545	promoter	0.304894	60.1605	26.8889	63.6111	53.7716	76.8148	88.2469	61.7901	48.3457	68.821	69.3025	59.1667	59.7654	73.7222	24.463	77.3827	68.8889	49.9753	103.821	83.1728	70.0494	61.3333	49.0679	112.506	87.8272	67.8827	85.716	112.346	167.111	182.765	121.914	133.012	140.179	96.5123	98.7654	92.5062	382.272	210.074	196.086	199.963	72.4568	88.3457	59.7284	93.2346	94.3086	101.21
Chr1	753892	754767	promoter	0.181807	224.827	226.389	380.259	337.716	271.667	312.111	325.926	335.414	286.494	313.549	294.309	296.222	304.21	246.642	300.012	647.025	663.117	349.333	230.852	427.543	609.469	542.741	421.019	391.296	352.315	484.901	671.988	775.253	944.5	642.901	735.358	1007.19	1016.88	956.623	949.531	1612.58	893.864	930.79	811.198	964.994	997.296	869.191	508.593	533.469	455.037
Chr1	755942	756722	promoter	0.227563	430.951	412.519	412.852	384.099	425.753	470.605	573.556	510.778	568.858	514.716	448.019	485.883	552.519	462.469	443.148	708.451	633.185	746.815	471.988	527.802	605.401	481.185	430.383	498.741	479.062	523.012	633.821	499.568	355.599	393.92	341.611	479.883	540.556	490.012	541.383	689.63	358.111	364.617	449.611	553.062	525.074	455.895	517.593	515.136	489.42
Chr1	760336	761680	promoter	0.162683	530.012	385.34	893.019	806.957	685.438	694.716	712.87	664.654	717.63	688.253	692.858	620.827	588.506	916.71	854.642	1109.28	1176.14	1257.34	973.074	1036.36	1039.42	741.877	1101.04	966.827	857.605	969.963	653.556	802.346	697.778	623.519	779.889	726.852	839.494	934.377	911.901	807.21	452.111	614.883	508.679	789.16	773.92	812.673	1302.27	1231.14	1148.52
Chr1	766570	768463	enhancer	0.223386	501.864	388.012	931.111	1014.72	1189.13	643.938	579.383	733.741	608.728	644.679	649.741	638.284	650.062	618.864	798.272	802.111	902.79	673.414	663.753	742.185	490.037	455.784	779.284	664.84	666.407	720.444	706.019	748.728	1132.47	1051.94	961.654	938.568	1019.83	1320.31	1257.7	835.951	836.543	926.148	847.944	555.753	517.444	446.531	1298.64	1257.79	1343.86
Chr1	771311	771630	enhancer	0.297989	121.346	61.3889	59.6173	84.9012	134.802	113.407	81.5	77.7407	107.79	113.753	101.235	99.8704	72.2654	166.79	194.568	94.5062	99.4568	76.1235	180.043	86.5679	114.414	95.0864	98.3086	96.2284	121.093	172.981	76.1975	121.037	142.772	96.8148	73.4444	127.407	150.42	200.185	164.062	133.037	83.7531	122.623	138.093	65.1728	91.4506	109.753	232.037	264.63	262.741
Chr1	772317	773711	promoter	0.159627	595.877	537.272	899.272	802.796	790.049	666.259	828.778	797.951	756.321	740.136	636.66	770.494	696.111	916.71	801.84	1066.9	1025.35	974.901	951.42	863.086	933.802	652.481	673.019	849.543	736.975	1040.94	622.864	628.309	805.364	690.222	659.037	728.383	790.049	878.512	793.858	553.191	464.63	460.852	438.395	827.543	751.506	706.377	1346.28	1309.98	1309.73
Chr1	779888	780970	promoter	0.145238	610.407	456.136	679.889	759.21	761.074	715.568	700.827	756.16	842.142	729.407	666.556	657.5	580.716	704.531	787.63	998.691	1078.72	895.012	825.938	1014.51	910.333	758.531	812.198	896.617	955.648	1295.51	617.667	699.667	620.13	590.827	501.506	679.123	651.222	661.321	636.951	547.395	364.333	439.556	401.605	651.21	507.728	517.315	1100.09	1150.77	1033.78
Chr1	785264	787596	enhancer	0.172214	3388.14	2227.14	2953.01	2615.52	2702.81	4480.68	3536.94	3860.57	3993.6	4113.89	3426.91	3936.42	3815.65	4586.04	4647.14	3109.1	3265.6	4327.3	4537.02	4865.02	2577.32	2156.84	3765.52	4506.36	4493.51	4220.73	2721.72	2738.63	2817.96	2732.54	2900.63	3005.41	2178.44	2291.9	2321.74	2248.22	2295.46	2731.72	2501.63	1889.88	1833.58	1777.19	2464.85	2471.1	2356.22
Chr1	787875	789147	promoter	0.268845	1099.2	820.407	831.025	968.241	693.568	1481.31	1061.17	1040.36	1237.2	1099.94	971.395	1064.9	1080.67	949.531	863.568	806.191	856.654	983.728	1035.83	1017.11	858.494	557.444	1052.68	904.123	1059.64	1035.09	930.173	768.543	589.556	585.321	799.117	622.444	592.741	548.284	633.296	1277.86	1020.77	789.037	699.426	567.185	560.698	510.556	577.938	605.889	622.975
Chr1	789754	790306	promoter	0.299338	309.938	310.333	284.432	250.951	161.259	442.506	322.352	354.469	368.988	456.753	396.852	311.136	346.827	399.222	550.278	379.988	418.401	460.704	541.531	615.901	401.765	265.84	371.42	469.79	456.679	387.877	358.13	299.741	255.938	292.204	187.475	346.333	258	312.432	273.821	384.198	280.444	255.031	336.543	258.346	243.84	194.975	285.667	274.815	333.753
Chr1	790935	791515	promoter	0.286442	429.154	390.309	395.383	379.296	301.111	492.833	466.531	403.457	562.852	466.457	465.469	471.988	525.716	379.025	457.975	732.469	606.198	325.012	401.222	445.037	682.71	423.877	336.488	372.778	497.056	507.864	564.593	456.809	362.605	374.926	435.025	497.407	537.296	554.556	522.327	1295.86	348.321	391.58	377.062	456.284	466.198	383.568	444.537	534.87	403.975
Chr1	792751	793599	promoter	0.200558	371.667	350.673	540.025	425.889	559.333	378.025	473.333	430.278	497.185	438.877	327.21	437.173	364.648	629.815	621.543	582.704	594.864	416.667	588.654	681.852	501.802	307.691	613.981	616.167	676.469	774.148	472.926	491.815	488.259	482.852	359.296	480.741	552.753	511.728	502.667	485.451	304.296	403.173	375.691	580.926	603.062	485.099	750.296	627.16	540.099
Chr1	795142	795753	promoter	0.278038	311.858	248.753	442.506	357.877	392.512	355.296	465.21	390.364	479.062	422.938	433.556	325.037	370.593	357.815	313.123	420.259	440.42	232.475	277.889	321.321	434.031	318.037	421.019	350.025	464.074	599.932	481.568	387.469	294.253	278.796	133.525	350.111	383.543	354.574	342.426	587.395	220.395	282.975	370.395	367	384.222	330.21	428.586	443.42	367.617
Chr1	798258	799445	promoter	0.19216	569.222	385.34	817.58	794.543	707.864	589.833	658.432	645.444	619.877	597.111	683.519	521.42	568.284	683.296	780.346	741.117	732.006	949.062	1010.44	971.889	665.173	562.914	717.136	805.926	899.469	932.259	499.006	518.778	507.358	443.772	390.099	557.642	491.963	521.123	504.642	797.747	347.605	489.852	328.333	446.457	491.056	458.512	905.259	1011.26	902.352
Chr1	802770	803061	promoter	0.294673	110.901	97.8951	67.8519	77.7654	47.142	132.389	120.543	122.457	143.79	129.451	134.852	137.469	134.259	137.037	144.247	75.2593	72.2469	132.025	230.852	97.5062	70.9259	60.2222	116.358	115.914	124.728	153.704	69.5432	105.815	175.025	131.259	148.611	129.58	116.228	114.685	141.463	130.265	86.2037	148.642	125.191	72.4568	106.358	89.0741	304.568	234.148	252.87
Chr1	806651	807666	promoter	0.135736	566.574	478.809	416.204	435.642	531.852	595.728	599.265	621.815	672.765	635.827	602.512	571.593	544.019	818.222	874.605	931.617	888.173	913.451	1111.01	1046.23	823.679	560	1099.65	1135.91	1273.01	1102.61	431.037	550.216	597.519	565.068	654.877	757.926	653.617	685.049	628.309	1035.92	465.377	477.716	498.444	602.877	578.148	510.556	1285.56	1336.31	1370.6
Chr1	812853	813763	promoter	0.180828	322.722	325.821	515.222	462.66	449.932	494.074	476.963	483.654	495.667	473.852	455.074	356.951	379.296	198.79	355.704	804.222	711.642	553.574	313.667	398.827	796.222	532.667	436.809	415.747	404.012	519.327	379.691	493.432	681.889	566.272	661.605	889.358	786.395	734.667	793.315	1554.93	377.556	459.247	485.42	662.37	669.056	536.352	969.833	1055.26	690.185
Chr1	819073	819953	promoter	0.241444	366.957	350.673	231.605	302.358	319	453.21	478.926	356.722	488.975	403.031	406.426	415.414	378.074	704.531	643.481	418.914	376.963	709.284	967.827	755.654	342.864	273.37	795.247	622.049	621.512	585.975	385.889	421.056	403.605	415.444	389.401	496.068	349.716	365.407	390.105	227.988	227.716	318.228	307.117	423.481	439.043	393.37	488.963	411.975	455.037
Chr1	824025	824923	promoter	0.262631	298.963	286.346	452.284	434.049	334.204	420.741	402.488	390.852	482.716	381.37	350.056	306.235	395.864	635.765	514.309	569.321	534.975	774.605	651.741	573.469	480.432	355.272	637.42	565.37	624.309	589.444	388	310.21	288.37	267.691	344.321	421.593	372.068	334.228	367.111	430.574	205.463	258.636	279.765	334.123	322.914	294.204	617.463	642.056	622.975
Chr1	826151	826653	promoter	0.271041	157.901	202.037	145.346	164.08	187.099	278.599	246.691	232.716	268.84	211.284	210.401	244.864	235.025	406.185	245.265	374.79	360.037	337.469	337.92	240.043	317.407	213.154	267.043	297.846	279.235	283.605	168.136	169.309	170.198	148.932	180.568	241.025	194.728	180.37	197.704	111.914	131.272	129.099	137.309	212.63	174.383	235.105	296.488	376.704	342.222
Chr1	830061	830931	promoter	0.188991	506.204	470.395	412.852	455.895	456.901	562.914	634.16	572.877	634.346	629.173	570.765	534.265	534.222	500.148	618.383	595.321	521.358	782.932	786.284	849.938	475.66	486.525	727.037	767.574	841.914	815.741	399.222	580.333	446.333	516.636	563.42	501.759	474.235	533.988	505.136	485.451	297.556	403.173	416.605	612.586	583.543	548.407	757.722	653.074	722.142
Chr1	835113	836164	promoter	0.29776	355.395	251.235	297.611	316.951	333.414	360.79	323.815	340.284	374.259	328.222	333.753	376.778	344.494	500.148	511.346	245.42	261.901	623.117	627.512	531.383	187.617	184.642	455.284	480.79	502.426	450.049	336.278	391.111	384.296	337.827	367.87	309.716	238.494	241.981	292.778	384.198	333.321	387.296	152.019	307.765	416.204	311.926	338.716	375.901	288.043
Chr1	840845	841149	enhancer	0.304513	71.2346	49.5185	44.284	77.7654	84.1235	67.3333	69.9568	79.8395	65.0679	66.9321	87.4506	89	61.8086	97.9259	77.3827	99.679	101.265	118.185	124.123	64.8148	90.8889	81	108.062	80.2716	85.1728	76.4568	69.5432	81.1111	53.0988	67.1481	49.5556	57.0864	79.3704	80.4198	67.9877	72.0185	44.9136	49.5556	67.4383	112.173	80.6235	71.4198	82.7407	63.0802	47.8025
Chr1	843968	844625	promoter	0.292905	201.846	209.605	151.506	151.543	191.481	128.235	177.204	159.08	159.488	152.79	142.531	171.543	167.358	553.272	411.475	274.074	240.481	438.58	608.302	607.136	219.037	129.432	671.617	510.105	569.191	443.148	216.198	234.605	292.407	331.327	263.623	370.259	310.475	319.099	321.019	393.049	218.92	321.586	374.889	325.37	290.401	290.914	178.432	189.012	173.278
Chr1	846005	846975	promoter	0.29174	273.617	296.648	507.975	535.895	309.975	375.358	401.006	433.42	427.173	422.938	289.5	357.914	430.883	488.698	501.926	509.864	440.42	709.284	519.259	592.086	434.42	301.617	674.753	502.037	544.914	496.556	370.58	294.222	331.821	241.438	212.309	252.228	256.864	330.481	366.333	401.926	320.198	325.253	317.296	296.062	322.914	330.21	629.457	670.531	614.963
Chr1	847335	848090	promoter	0.214871	613.778	438.049	498.037	502.691	378.086	555.105	516.753	498.568	727.877	598.346	576.938	483.778	697.568	524.025	535.123	507.728	481.642	709.284	688.704	621.364	520.42	355.272	563.975	590.525	749.111	679.086	615.494	529.895	426.333	440.827	475.302	571.728	500.79	598.846	577.667	696.247	441.259	561.37	505.944	507.66	488.056	383.568	577.938	537.407	590.975
Chr1	849723	851117	enhancer	0.224959	316.049	301.667	356.833	384.099	416.716	514.198	349.086	375.79	317.407	463.235	479.914	403.383	424.963	572	583.222	297.062	296.284	337.469	436.938	354.58	323.025	254.63	463.654	377.877	341.37	345.71	503.642	485.605	530.302	356.722	401.802	389.691	566.667	664.494	628.309	627.191	385.852	546.383	372.469	602.877	563.185	546.043	2262.05	2143.1	2325.33
Chr1	851358	852418	promoter	0.1987	490.932	279.37	463.586	521.185	466.605	530.772	451.309	477.136	576.457	534.13	582.556	589.074	454.506	584.63	680.093	531.79	542.753	523.099	362.691	420.296	484.753	386.383	344	413.815	422.636	411.926	486.642	544.531	529.333	443.772	550.617	445.728	564.802	588.185	572.63	549.636	433.728	706.086	605.79	474.432	492.457	412.574	1336.77	1363.01	1337.77
Chr1	853089	854289	promoter	0.161495	976.154	667.864	745.284	887.451	568.877	1246.99	1013.99	989.512	1319.43	1109.53	1021.11	1148.52	1221.19	482.636	526.704	1385.53	1330.32	553.574	464.852	466.148	1353.28	1080.31	353.457	466.235	530.247	700.494	1136.77	1122.56	674.321	613.802	669.531	980.469	780.772	878.512	779.377	1528.28	625.852	919.123	623.148	877.08	735.704	807.63	621.815	727.926	722.142
Chr1	859523	860457	promoter	0.290947	348.519	154.87	315.889	256.049	291.951	439.093	406.599	410.728	574.543	502.864	331.63	425.778	334.457	365.062	555.815	382.728	391.049	602.259	415.889	553.846	362.772	254.63	371.42	503.784	479.062	743.111	331.951	424.765	333.086	291.79	258.352	323.37	301.802	364.358	357.815	321.543	200.383	303.907	297.494	391.951	288.259	317.833	452.457	433.272	438.877
Chr1	863882	866293	promoter	0.143756	1892.91	800.704	1718.9	1880.72	1875.58	2020.07	1831.23	1847.42	2506.64	2365.23	1999.14	2136.81	2120.09	3004.91	2962.19	1838.7	1793.79	2641.06	3155.83	2996.41	1471.88	1345.89	2726.49	2581.57	2561.6	2569.36	1694.36	1952.99	1584.49	1371.69	1351.14	1544.42	1451.79	1530.6	1485.4	1030.84	1435.12	2068.19	1193.91	1042.72	1012.72	1115.4	1970.98	2022.88	2037.28
Chr1	867589	869161	promoter	0.189429	2412.4	1080.75	2205.44	2275.91	2071.59	2047.65	1607.38	1856.32	2326.04	2050.94	1784	1837.84	1954.46	2458.14	2622.01	3238.8	2990.04	2703.8	2509.64	2500.83	2992.26	2117.37	2494.88	2367.05	2429.47	2758.44	1704.23	2015.79	2168.83	1940.35	1846.12	2472.65	1841.99	2124.64	2066.99	2507.7	1572.51	2216.1	1962.68	1620.94	1513.02	1663.86	2972.89	3129.23	2865.83
Chr1	870998	871809	promoter	0.14415	894.642	773.074	709	813.79	747.691	839.494	957.056	855.235	977.66	1008.47	734.346	754.975	801.025	774.728	859.123	1254.35	1157.15	904.198	967.827	1083.71	1215.38	966.173	1267.06	973.704	1151.32	1162.1	707.765	841.562	1134.7	960.21	825.37	1114.1	972.611	1051.67	969.679	900.296	714.71	924.185	809.765	913	870.469	803.457	1162.1	1287.75	1026.79
Chr1	875687	876268	enhancer	0.29557	339.512	315.352	297.611	300.265	254.728	470.605	387.025	394.469	501.463	417.272	373.179	326.111	481.852	292.204	315.222	476.309	486.84	298.704	337.92	346.049	517.617	331.222	361.309	305.784	326.889	426.395	522.691	422.889	322.049	315.099	335.679	338.111	414.265	398.66	432.519	659.414	258.667	284.698	314.944	443.938	464.42	487.778	353.037	379.568	252.87
Chr1	877258	878316	promoter	0.109376	1705.16	1506.44	1276.71	1448.8	1078.52	2290.81	2047.88	1891.36	2244.57	2063.95	1748.35	1761.33	1884.1	1035.94	1245.44	2311.23	2329.32	992.981	1020.3	1155.69	2273.68	1551.1	1183.28	1032.4	1087.44	1215.43	2096.63	2049.22	1553.06	1257.4	1429.91	1659.36	1629.2	1575.09	1567.58	3842.48	1307.33	1290.67	1114.81	1846.67	1682.9	1556.56	969.833	1094.32	996.679
Chr1	879720	880673	promoter	0.202268	426.13	263.395	467.728	471.315	414.383	325.901	403.136	343.506	358.265	399.173	371.074	329.957	319.364	541.383	574.679	611.802	657.309	562.914	651.741	604.753	573.815	418.185	700.951	635.975	535	519.327	265.031	408.173	630.407	483.617	645.741	639.272	550.16	606.519	630.519	843.321	354.951	484.407	267.815	520.914	446.321	528.16	894.377	1019.15	834.932
Chr1	883218	884034	promoter	0.280887	281.21	144.623	280.944	235.71	192.593	329.414	266.34	320.623	378.191	330.58	276.222	248.395	330.117	230.753	287.951	396.889	286.16	349.333	221.21	286.914	337.741	171.383	272.642	242.333	269.889	370.123	385.889	362.654	179.543	205.346	165.519	263.099	277.377	271.494	289.728	258.568	152.963	231.716	194.815	154.043	227.198	194.975	359.667	318.395	367.617
Chr1	887916	888465	promoter	0.300094	189.284	162.296	148.395	183.173	187.099	268.37	248.148	252.259	292.605	305.543	257.975	245.907	228.784	424.802	366.617	218.889	172.679	449.877	506.333	482.87	208.802	111.926	427.926	491.358	401.556	430.148	171.117	248.259	201.123	167.395	182.444	156.586	149.556	146.333	155.716	119.679	88.4259	142.895	129.457	135.802	124.074	200.432	248.148	268.531	204.056
Chr1	889691	890537	enhancer	0.196763	490.068	350.673	577.556	665.494	606.432	683.58	685.333	614.568	764.877	676.395	613.611	583.198	576.031	651.981	629.852	683.457	657.309	922.469	747.852	829.531	624.938	568.321	785.889	744.66	803.191	700.494	537.753	650.395	526.074	473.519	355.481	470.037	493.951	493.84	500.691	789.901	311.494	417.549	338.741	374.802	403.914	335.642	648.691	664.025	657.42
Chr1	892149	893221	promoter	0.160778	1051.74	750.142	616.395	694.852	563.877	1199.92	1128.85	1021.19	1318.25	1165.74	1081.53	1045.96	1105.52	578.704	636.562	918.272	965.37	582.228	553.846	594.889	812.877	776.148	666.833	559.84	803.191	713	1754.41	1712.4	1044.89	1096.87	1064.06	886.284	918.222	895.778	916.58	1996.2	901.741	1184.78	905.08	731.617	746.951	724.494	533.895	568.136	556.593
Chr1	896236	896851	promoter	0.290811	409.383	353	412.852	448.667	387.901	539.802	736.259	611.265	647.025	673.728	583.889	484.988	564.407	839.988	681.852	359.056	312.605	782.932	764.198	798	340.889	338.994	1104.59	866.556	766.963	693.815	278.185	253.994	257.025	231.074	172.753	114.772	150.42	180.37	195.556	377.969	234.062	248.259	244.593	177.852	88.3457	120.605	185.815	172.889	262.741
Chr1	897254	899212	promoter	0.185434	1925.19	1291.52	2176.24	2307.26	1972.79	2131.69	2411.44	2464.37	2228.81	2307.26	2106.95	2280.4	1956.19	2625.43	2561.99	2367.05	2214.41	2752.4	2935.85	2662.79	2083.74	1635.88	2612.77	2604.11	2478.36	2845.1	2042.14	2569.36	2996.83	2421.09	2625.14	2497.09	2351.17	2583.59	2601.73	2984.59	1936.79	2818.52	2409.44	1576.9	1638.75	1573.53	5116.88	5166.22	5132.73
Chr1	899578	901002	promoter	0.168558	911.012	504.16	1035.73	1036.96	922.494	1175.58	1018.13	1078.05	1146.77	1191.64	1110.15	1113.32	1040.49	1117.11	1157.09	1056.42	1143.54	1163.22	1471.12	1347.54	1113.32	857.37	1566.85	1289.22	1313.94	1540.31	1415.44	1645	1272.67	1067.52	1179.88	1166.3	1248.81	1536.37	1462.74	1679.3	1077.42	1809.56	1423.95	1268.41	1354.2	1351.43	1878	2085.25	1966.05
Chr1	903202	904324	enhancer	0.220501	655.543	466.531	467.728	464.284	547.309	1097.62	681.654	970.685	829.63	902.432	780.123	989.123	934.815	1319.68	1216.13	730.654	754.302	1579.96	1880.06	1742.59	568.716	452.37	1237.59	1642.41	1096.81	1085.5	690.883	768.543	702.333	804.778	812.827	629.889	683.395	727.222	682.333	619.784	562.086	1143.2	733.704	504.864	499.784	521.63	504.506	399.728	446.728
Chr1	907014	907929	promoter	0.139184	430.951	478.809	483.728	622.543	594.895	595.728	609.198	651.34	641.827	711.753	519.401	562.642	462.519	677.84	747.58	1312.51	1326.57	832.086	651.741	834.358	1276.71	857.37	689.42	742.302	639.92	864.123	668.691	585.105	953.438	652.994	756.13	1198.72	913.265	1089.63	989.556	2020.46	580.074	588.833	631.5	997.494	1047.74	1074.49	1485.33	1661.32	1219.89
Chr1	909217	910204	enhancer	0.144971	1195.2	960.79	802.235	759.21	682.025	1321.68	1221.1	1038.39	1490.28	1283.83	1117.81	1064.11	1011.81	482.636	651.852	1221.38	1134.66	709.284	797.296	744.562	1145.56	874.142	971.426	722.605	931.284	774.148	1060.04	1062.84	1122.21	922.698	1059.9	1227.6	708.204	821.315	784.444	1488.73	927.63	1055.77	951.556	990.111	809.765	935.543	644.84	721.605	779.975
Chr1	911944	912628	promoter	0.26397	184.296	133.71	174.827	110.889	154.957	202.093	169.512	156.753	231.741	226.617	158.716	157.58	211.296	629.815	592.568	168.673	182.556	746.815	803.543	721.407	154.025	111.926	756.16	717.84	803.191	716.611	95.4568	88.6296	81.5802	112.37	61.2346	91	83.8025	63.5802	70.3457	182.056	81.7407	112.21	100.778	86.9753	49.8765	35.9012	157.241	125.716	101.21
Chr1	917628	918633	promoter	0.110843	807.481	692.815	635.494	711.79	606.432	1066.77	1028.39	907.117	1140.19	1050.16	945.846	918.969	827.012	1513.46	1642.93	1369.19	1459.72	2014.9	1437.14	1595.96	1340.99	843.574	814.136	1215.82	1277.19	1323.36	1018.68	958.198	1079.52	945.741	929.296	1226.81	952.617	959.988	913.531	1249.41	678.975	801.543	920.66	969.593	958.198	1057.27	1022.26	970.895	1101.1
Chr1	920007	920281	promoter	0.30415	44.4691	30.4568	101.006	112.204	85.216	79.8148	85.9506	67.1235	61.2963	81.784	72.3889	71.5926	85	97.9259	96.6605	197.735	198.198	89.8025	113.42	108.173	251.605	151.247	98.3086	121.549	78.1914	81.037	56.4321	52.1543	37.9259	26.284	41.4938	81.3827	83.8025	107.068	111.519	127.611	35.9198	43.4938	38.5062	154.043	151.802	145.654	148.148	117.315	127.198
Chr1	921714	922584	enhancer	0.260896	331.025	192.642	264.062	235.71	248.84	260.963	228.883	248.049	339.586	359.568	279.827	265.247	241.963	710.105	596.185	334.765	341.975	394.296	506.333	476.309	324.753	228.426	228.605	399.667	451.444	297.753	204.704	315.691	197.056	216.099	224.827	256.444	263.519	277.704	279.543	158.704	176.074	224.877	119.58	229.062	258.741	255.383	861.951	764.198	951.605
Chr1	926992	927489	promoter	0.299063	97.2099	100.21	83.9753	82.3951	107.16	103.593	75.1975	90.1852	134.883	149.179	120.759	116.074	83.716	214.963	283.79	122.728	90.3889	218.272	180.043	194.438	123.938	76.5185	145.691	155.667	188.84	165.543	110.642	74.8642	103.667	104.556	120.117	152.426	101.537	111.062	148.309	138.765	63.8025	83.463	107.475	83.1914	137.216	149.136	675.012	741.802	812.235
Chr1	928433	929155	enhancer	0.293187	118.901	77.0123	148.395	150.247	133.914	166.142	153.617	159.691	154.198	186.901	203.667	227.031	159.722	444.173	319.63	155.481	114.358	286.198	337.92	290.914	114.414	90.2593	254.29	240.395	304.259	257.599	154.58	161.216	140.63	111.37	144.864	153.148	134.574	138.568	129.389	119.679	123.716	136.981	60.1975	98.4568	146.605	92.7099	240.642	276.654	288.043
Chr1	929603	933831	promoter	0.154819	4891.99	2756.98	4287.94	4358.2	4147.72	5083.83	5064.53	4981.35	5834.07	5219.8	4645.28	5003.38	4076.34	6776.75	7955.16	4074.81	4128.89	7955.16	9527.93	8179.83	3711.4	3315.33	6487.89	7148.6	7876.55	7896.36	3963.33	4089.48	2812.67	3148.8	2970.31	2736.43	2332.02	2439.73	2422.27	3481.2	2381.09	3121.8	2516.24	2123.43	2218.21	2237.84	4965.25	5258.6	5041.61
Chr1	936431	938182	promoter	0.130085	1181.33	1003.36	1137.65	1155.56	1140.68	1580.94	1595.13	1531.53	1900.16	1531.96	1192.89	1472.09	1254.35	1381.2	1471.68	1462.06	1166.88	1759.56	1652.29	1676.74	1339.93	1130.88	1587.35	1479.67	1488.23	1465.57	1936.94	1655.86	1086.62	976.877	982.889	1154.71	821.716	881.673	839.531	1253.41	1130.95	1102.91	843.037	958.457	1033.28	1010.77	1111.77	1276.6	1363.01
Chr1	943058	943733	promoter	0.281702	250.765	123.63	198.198	165.519	160.321	226.864	219.864	246.543	280.198	270.333	272.642	240.093	232.272	379.025	326.346	301.802	322.864	371.938	430.574	326.13	236.383	213.154	228.605	286.309	391.173	334.593	273.543	346.111	368.753	303.889	322.778	271.16	301.21	290.914	313.123	253.333	186.617	207.29	284.975	171.333	182.784	176.444	334.926	338.944	403.975
Chr1	951543	953502	promoter	0.119575	1493.26	1118.4	1107.86	1076.73	1061.52	1339.85	1448.64	1271.89	1446.72	1458.2	944.123	1077.64	797.006	1641.17	1706.36	2128.86	2051.52	1903.12	1903.44	1760.26	1936.48	1375.06	1935.17	1851.88	2143.1	1807.64	916.142	926.821	1612.91	1347.88	1390.51	1339.53	1423.34	1618.91	1516.83	1293.9	1101.35	1092.51	839.988	1457.35	1443.89	1251.01	1350.44	1369	1148.52
Chr1	953846	954661	promoter	0.301088	416.519	187.432	148.395	138.988	98.1481	173.099	187.617	190.284	221.963	233.086	167.284	153.265	112.383	518.272	461.617	227.63	211.617	371.938	415.889	358.926	238.358	202.062	356.722	319.667	261.222	239.37	123.642	126.469	286.056	254.173	149.914	122.852	350.71	361.451	378.537	212.309	160.383	147.228	89.4198	94.5309	94.1111	106.636	403.315	393.093	489.42
Chr1	956366	958431	enhancer	0.156108	1305.22	949.593	1410.99	1320.02	1019.41	817.296	1554.14	1424.22	1435.2	1512.63	1195.2	1193.08	894.58	1364.49	1368.29	1507.91	1451.05	1120.3	1328.84	1185.73	1410.91	1041	1365.35	1401.13	1396.31	1431.79	1141.63	1204.26	1358.09	1083.83	1063.33	1116.8	1781.83	1955.9	1914.54	1799.89	1093.04	1232.15	1175.49	831.395	862.272	919.457	1141.27	1068.44	1148.52
Chr1	960730	962266	promoter	0.148911	910.111	548.062	1114.2	1034.34	1126.44	924.037	915.877	903.451	1104.8	1079.69	895.704	1026.23	872.241	1666.05	1628.99	1093.24	1200.38	1036.4	1262.83	1334.53	992.364	846.154	1238.7	1295.37	1434.68	1533.91	585.556	850.574	860.235	679.753	678.772	717.605	715.179	681.346	723.364	1094.78	464.63	753.284	518.086	594.901	634.389	615.111	802.383	792.377	657.42
Chr1	966481	968021	promoter	0.231319	798.272	433.728	998.025	1047.62	894.309	890.481	772.278	890.167	915.42	953.272	813.79	853.049	804.111	1075.27	1096.35	1299.54	1314.12	1080.62	595.278	903.895	1125.04	882.914	695.117	778.012	687.716	845.111	649.148	552.63	506.185	429.556	494.42	488.605	579.901	664.494	686.642	561.802	440.136	551.296	402.259	504.864	459.63	490.296	778.222	784.642	648.556
Chr1	970370	970969	promoter	0.284894	246.605	204.765	315.889	300.265	287.086	228.858	215.272	237.833	325.938	293.488	278.568	243.136	271.988	535.21	535.123	273.21	304	273.617	378.432	264.346	304.407	193.457	288.327	311.889	474.099	380.728	193.167	172.642	175.852	158.426	111.938	216.852	239.63	274.506	204.852	217.568	95.2654	182.136	125.716	304.716	258.741	235.105	345.827	425.753	394.969
Chr1	972910	973537	enhancer	0.291103	415.037	219.395	376.889	296.648	497.123	448.019	361.321	423.253	479.698	547.84	397.765	539.21	496.309	934.815	934.309	371.241	404.827	553.574	895.512	678.66	385.204	228.426	759.63	605.654	489.444	470.432	290.728	349.969	359.247	309.605	252.148	393.667	324.605	367.531	386.42	273.327	254.747	325.253	295.519	261.519	333.58	309.012	460.444	462.846	522.494
Chr1	974735	975819	enhancer	0.24775	1346.23	894.969	1283.23	1242.94	1414.41	1883.78	1253.01	1638.29	1321.64	2172.81	1226.72	1340.38	1706.58	1957.54	1919.2	1356.91	1202.56	1880.52	2061.96	1931.2	1092.04	982.809	1796.84	1963.66	1980.02	1801.04	474.37	547.642	691.148	696.049	484.358	649.617	469.222	461.321	499.173	551.42	424.728	593.741	442.636	215.926	286.099	290.914	700.617	632.296	820.272
Chr1	976239	976469	enhancer	0.296402	98.1852	82.3086	128.074	131.259	104.969	171.056	119.691	94.0926	138.08	163.506	103.988	147.975	167.358	113.815	123.136	174.068	222.284	118.185	102.92	119.191	174.975	168.71	152.426	123.975	205.568	153.704	50.6543	88.6296	49.4753	57.6914	80.0988	98.0617	113.827	114.685	94.4136	95.6173	41.1605	80.1543	28.1975	90.6543	65.0679	48.4568	118.481	106.136	60.9136
Chr1	977517	979512	promoter	0.179669	3809.58	3188.94	3095.85	2852.79	2870.89	5028.49	4337.58	4307.05	4331.04	5099.48	3824.64	4840.75	4522.26	5481.67	5910.9	3433.26	3274.35	7187.36	7167.98	7023.52	3026.93	2688.16	7448.65	6623.84	7023.52	5471.42	1737.1	2258.49	3085.63	3154.72	3046.8	1991.23	1827.54	1820.02	1684.31	3661.28	2083.32	2700.07	2707.23	839.037	727.222	844.531	957.086	867.852	730.654
Chr1	981604	982454	promoter	0.169445	1185.56	1223.55	1065.22	1176.78	799.117	1553.59	1632.14	1398.19	1563.69	1650.4	1267.77	1382.04	1486.21	2863.75	2309.08	1691.27	1441.52	2976.79	2194.86	2543.48	1696.99	1338.3	1494.49	1909.48	1817.63	1202.94	1369.09	1578.25	1740.31	1509.28	1375.14	1312.75	1172.72	1348.67	1261.9	2305.71	1023.73	1404.81	1289.64	984.284	947.556	994.852	1181.2	1142.81	1634.27
Chr1	983188	985009	promoter	0.229956	1699.81	1472.37	2360.25	2413.32	2022.71	2337.21	2605.85	2448.9	2470.1	2670.25	2228.6	2641.78	2101.06	2117.2	2198.63	2926.26	3046.22	2535.71	2258.49	2143.36	3078.11	2470.64	2446.27	2072.99	2466.89	2038.02	2671.31	3231.9	4170.48	3495.99	3757	3015	3437.1	3973.85	3926.04	5149.38	2792.37	3380.69	3131.23	2263.9	2358.84	2449.58	2137.85	2264.88	2544.85
Chr1	990913	991380	promoter	0.305085	208.259	165.037	183.469	184.673	179.457	247.111	243.975	210.086	252.938	223.815	198.235	201.117	224.691	379.025	326.346	225.975	198.198	382.926	415.889	423.852	213.346	220.988	265.704	370.358	357.284	283.605	171.117	182.932	162.247	147.272	139.981	166.79	119.741	157.185	176.864	240.463	119.691	125.914	171.975	143.556	116.247	75.2716	174.494	164.475	173.278
Chr1	992938	993692	promoter	0.127642	818.259	899.58	653.481	701.148	715.34	1033.48	930.247	869.37	1097.54	879.673	744.846	715.049	830.784	590.099	798.272	1313.99	1295.85	857.247	835.42	739.093	1502.82	1000.31	1037.78	966.827	948.272	1065.01	603.086	803.864	848.691	840.58	659.037	835.296	864.253	878.512	863.049	1772.22	441.259	537.586	599.506	874.901	958.198	1092.59	742.802	848.333	796.086
Chr1	995650	996409	promoter	0.211854	535.383	509.506	267.691	392.79	398.111	714.463	688.358	594.84	856.074	666.407	543.426	553.784	663.679	313.444	330.21	658.84	587.901	325.012	378.432	412.63	575.457	435.16	396.475	381.5	502.426	531	637.994	506.333	466.16	402.617	489.716	557.642	440.71	439.432	457.728	559.864	435.667	482.901	415.568	518.389	557.364	510.556	428.586	461.901	413.056
Chr1	1000348	1001203	promoter	0.211279	443.309	226.389	435.617	392.79	423.037	382.185	327.16	309.778	380.889	346.932	316.58	329.957	378.074	710.105	801.84	287.185	326.951	632.778	730.556	657.333	271.593	193.457	690.383	594.802	489.444	567.586	205.506	213.796	356.469	278.21	232.475	306.605	244.673	214.512	285.815	353.235	206.272	294.099	326.938	325.37	243.84	235.105	769.691	672.914	705.716
Chr1	1004275	1005072	promoter	0.239479	377.321	312.698	366.63	234.253	299.963	265.963	313.549	272.895	343.272	306.21	319.049	262.506	318.228	500.148	444.642	235.136	224.519	438.58	457.951	423.852	216.827	121.037	456.284	433.802	385.765	456.809	252.605	236.377	333.611	261.358	289.852	243.975	255.37	273.617	332.79	302.907	262.265	349.79	291.432	212.63	245.735	220.395	664.29	688.741	762.765
Chr1	1008081	1008820	enhancer	0.296129	323.395	125.938	183.469	214.16	207.679	335.148	265.272	269.519	356.716	316.531	291.562	256.772	286.568	246.642	308.951	235.716	198.198	438.58	296.574	386.852	209.951	140.056	255.444	295.136	275.963	253.525	388.914	292.235	277.691	248.784	249.636	232.833	258.537	268.185	264.685	169.395	237.012	361.08	368.802	232.34	249.235	220.395	331.21	319.481	377.062
Chr1	1010163	1011603	promoter	0.148476	633.914	449.691	876.16	944.167	760.481	711.531	845.395	805.253	796.333	793.198	613.611	701.753	567.025	1264.12	920.531	1079.6	975.099	1306.99	1091.86	1165.93	933.16	668.457	933.901	909.105	1087.44	966.049	781.364	660.494	761.074	624.056	635.556	670.198	658.019	708.235	602.512	696.247	548.691	593.741	454.025	665.111	596.951	609.512	1108.28	980.29	989.556
Chr1	1013328	1014033	promoter	0.297209	314.568	147.309	172.037	217.228	223.988	268.37	207.864	225.846	374.963	368.309	271.623	243.988	289.309	469.426	370.111	205.654	172.679	382.926	415.889	378.994	170.395	184.642	278.667	353.469	346.864	422.741	207.444	286.877	127.111	152.673	140.753	216.074	147.963	167.272	212.123	130.265	114.679	240.617	96.2901	177.852	174.383	149.136	278.543	331.605	306.722
Chr1	1017452	1018402	promoter	0.180734	552.741	288.457	480.469	491.012	464.235	618.926	578.914	553.784	651.802	697.259	597.506	550.136	588.506	469.426	480.358	557.963	523.154	481.006	614.549	509.321	542.728	383.494	612.086	516.914	658.259	649.185	588.012	672.815	692.16	616.426	682.784	612.346	626.444	607.228	595.519	587.395	442.049	648.494	793.259	683.173	672.222	613.136	675.012	643.716	665.938
Chr1	1021917	1023101	promoter	0.2362	727.432	474.432	912.309	821.315	806.525	856.821	966.136	819.025	1001.42	924.667	994.691	802.438	984.765	906.346	1029.57	796.383	967.593	746.815	962.241	913.352	745.432	615.802	997.407	853.111	1124.8	1028.47	488.333	520.42	500.37	492.247	551.691	465.21	459.019	489.148	465.556	768.259	331.148	341.407	357.753	404.654	347.642	414.432	464.432	422.957	505.852
Chr1	1023617	1024796	promoter	0.126815	1032.4	626.099	1260.9	1233.69	1054.19	1091.62	998.864	1066.9	1216.93	1149.3	949.593	1058.8	927.889	1429.65	1557.4	1613.01	1558.81	1880.52	1721.81	1456.14	1623.69	1060.62	1192.03	1316.44	1045.93	1304.65	884.617	1093.86	1296.95	937.481	1013.22	1251.58	1258.75	1352.34	1351.23	1053.4	712.012	821.815	772.16	1155.94	1173.73	1172.06	1289.22	1443.42	1475.4
Chr1	1028037	1031433	promoter	0.0989961	3768.1	3093.49	2546.6	2706.85	2293.67	4579.42	3926.04	3814.72	4925.42	4414.05	4094.47	3779.01	4296.06	1934.99	2311.95	3195.81	3054.07	1822.95	1865.1	1703.59	3141.43	2590.31	1925.9	1888.27	2172.31	2931.86	4124.6	4067.91	2770.68	2670.25	2527.05	3202.25	2070.21	2185.57	2179.76	6388.69	3134.73	3322.15	2963.72	2373.64	2263.04	2280.6	4312.38	4246.3	4207.57
Chr1	1035871	1036828	promoter	0.148207	370.84	303.883	629.506	652.284	525.716	499.049	535.802	468.907	493.654	528.043	481.37	461.963	441.827	726	764.679	1246.69	1270.79	848.667	851.444	879.963	1310.85	941.704	783.938	833.593	866.086	868.414	495.951	554.735	783.79	611.593	712.599	991.049	834.932	911.901	820.407	1070.93	274.222	338.123	317.296	809.284	822.667	818.568	1026.93	1161.88	943.926
Chr1	1040039	1040734	promoter	0.298525	195.802	182.84	241.556	229.728	240.914	252.278	252.185	264.074	276.241	289.5	242.654	218.889	218.617	246.642	351.84	333.926	332.457	311.772	250.025	220.821	237.049	210.309	234.395	275.235	230.901	394.988	228.772	242.185	289.556	224.42	220.364	311.346	333.988	371.167	358.321	297.667	178.759	162.321	156.667	177.852	301.296	189.247	356.377	373.827	540.099
Chr1	1042846	1044208	promoter	0.252019	383.827	260.617	577.556	647.056	425.753	648.759	590.481	585.642	631.71	602.704	655.58	636.716	585.432	431.16	338.259	632.815	655.66	286.198	337.92	492.827	566.667	512.284	491.198	434.864	401.556	470.432	593.5	529.895	384.111	301.685	250.852	398.086	499.753	523.123	527.704	691.951	469.759	467.975	403.179	355.506	364.981	367.198	403.315	461.599	422.34
Chr1	1045282	1045482	enhancer	0.304848	78.037	58.5802	44.284	42.7037	76.8148	98.2593	81.6975	90.8272	116.802	106.025	131.272	120.025	105.58	263.16	138.08	44.4691	55.4012	145.395	93.1728	70.0494	47.4444	44.4691	147.778	82.7407	74.6296	103.025	48.3704	100.173	73.6667	74.6235	86.5185	29.3025	42.5802	55.7778	44.3272	36.3951	43.2099	88.6296	80.1975	39.2099	34.0679	27.5802	137.519	119.407	127.198
Chr1	1049452	1050649	promoter	0.120388	616.272	645.42	1114.2	1100.09	955.926	982.877	947.074	878.556	955.593	919.654	976.877	863.247	869.722	848.815	754.019	1414.54	1426.07	1071.77	753.086	873.123	1417.19	1060.62	1009.07	881.37	952.667	908.309	782.852	914.84	1274.6	1104.75	1200.38	1174.99	1228.07	1321.52	1240.88	1491.67	549.358	634.488	651.685	1349.12	1310.06	1193.77	1455.52	1514.2	1383.89
Chr1	1050854	1051664	promoter	0.167144	574.222	495.025	761.975	782.562	510.691	763.778	881.5	779.889	888.352	827.432	677.549	743.704	786.247	488.698	392.63	1145.52	1191.14	653.938	436.938	602	1134.55	851.716	383.346	501.062	391.173	527.438	723.63	791.864	536.71	522.198	556.944	631.173	735.944	744.179	744.414	1590.54	384.704	491.383	437.068	700.852	771.074	701.753	492.864	579.605	403.975
Chr1	1059003	1059765	promoter	0.252913	321.963	330.253	297.611	342.451	257.981	535.457	437.846	473.654	498.87	473.852	437.198	341.685	456.111	292.204	323.809	562.056	524.975	664.025	378.432	412.63	486.765	378.191	460.901	424.185	461.642	460.395	369.426	393.111	286.938	317.5	334.815	384.296	284.432	295.827	298.407	715.765	255.988	286.568	256.012	298.506	319.043	235.105	444.537	419.519	446.728
Chr1	1063977	1064840	promoter	0.136379	821.37	903.21	719.012	761.179	810.728	1235.79	957.056	800.852	1216.53	931.827	822.79	960.037	811.099	629.815	676.802	1708.38	1581.96	623.117	499.654	644.679	1901.16	1290.57	775.63	709.235	793.333	815.741	661.531	641.994	828.191	730.741	702.593	786.21	910.259	1009.86	969.679	2109.37	584.031	504.747	646.599	1056.7	1201.6	1319.51	928.623	970.272	974.235
Chr1	1070742	1073612	promoter	0.221728	3126.8	2146.15	4620.54	4920.74	4254.21	3116.15	3113.32	2968.1	3305.77	3135.3	3635.75	3871.32	3022.98	3440.43	3537.65	3095.85	3263.19	3267.42	2881.87	2841.63	3106.84	2260.05	3066.73	3206.95	3083.91	2611.52	1973.85	2331.32	2784.16	2009.04	2129.56	2661.05	2323.28	2557.98	2454.37	2855.16	1684.31	2005.43	1800.02	2122.2	2010.48	2129.78	3492.36	3744.12	3182.52
Chr1	1080257	1081707	promoter	0.11767	1462.74	873.938	1244.14	1320.02	1199.16	1415.1	1487.27	1436.17	1593.07	1410.37	1573.64	1314.96	1478.95	1023.37	1167	1583.8	1386.3	802.037	1165.1	1150.81	1510.73	1130.88	1452.01	1202.27	1263.31	1499.42	1111.7	1269.41	1641.51	1529.98	1356.59	1657.28	1089.56	1224.9	1266.81	1463.67	900.648	1352.98	1121.99	823.457	977.87	826.784	1818.64	1792.89	1556.44
Chr1	1084223	1086437	promoter	0.119489	1838.7	1204.98	2612.45	2480.47	2180.12	2324.3	2392.89	2330.11	2433.17	2353.86	2293.95	2168.41	2111.12	2100.89	2198.63	2871.31	3179.4	1994.73	2446.86	2070.04	3184.46	2194.47	2319.86	2428.38	2668.75	3238.02	2050.94	2207.04	2357.43	1964.48	2106.95	2235.01	2279.6	2480.7	2349.03	3388.83	1272.16	1703.98	1695.33	1994.93	1889.72	1930.67	2601.06	2858.1	2579.2
Chr1	1095891	1097347	promoter	0.146121	793.358	488.728	1182.4	1007.13	1050.7	980.975	903.21	885.765	1022.2	959.568	909.21	866.698	852.617	959.469	1011.95	717.019	630.568	1227.2	1367.92	1214.09	616.593	570.796	840.605	1016.46	1067.46	1336.95	724.383	791.864	963.556	961.037	899.049	900.062	636.025	675.13	742.42	895.173	641.877	864.123	920.111	734.37	685.049	600.506	1305.37	1303.21	1383.89
Chr1	1101043	1101255	promoter	0.303252	100.123	108.173	148.395	147.753	144.543	73.2222	90.3457	85.9506	136.21	139.556	148.093	105.611	120.123	214.963	144.247	55.821	55.4012	189.556	147.123	209.753	124.519	92.6728	193.309	135.988	162.778	128.475	49.0679	60.3395	67.6543	60.642	87.1728	50.1481	22.4198	31.4444	44.3272	39.463	36.7654	55.858	30.1852	47.4383	60.0556	35.9012	127.901	120.438	139.444
Chr1	1101633	1102449	enhancer	0.253721	737.58	414.531	731.821	680.093	613.401	615.074	445	683.525	883.753	857.21	683.519	661.235	629.068	1166.67	1168.8	548.852	578.136	756.5	758.833	764.988	556.778	452.37	762.364	601.043	682.728	418.895	192.272	174.302	346.284	406.302	299.42	190.506	201.185	245.278	218.648	300.265	204.21	263.623	250.698	116.228	91.4506	169.395	320.494	282.401	489.42
Chr1	1102904	1103655	enhancer	0.185653	759.358	531.926	752.34	635.938	779.377	595.728	729.019	804.5	1000.37	807.481	696.395	797.519	661.383	1331.72	1322.2	694.66	752.216	1145.06	1030.36	1176.23	695.938	530.321	810.006	900.957	805.809	962.049	320.951	515.179	439.037	480.679	547.79	460.877	446.216	426	433.123	500.235	259.457	401.556	294.747	254.901	326.864	317.833	553.407	637.691	705.716
Chr1	1104150	1104364	promoter	0.304087	182.574	100.21	83.9753	90.1852	118.623	91.8395	84.7284	107.296	173.84	142.753	139.049	111.358	101.444	214.963	203.457	54.2469	57.4198	118.185	102.92	178.691	61.3333	57.8272	139.741	119.019	78.1914	132.821	63.2346	72.963	77.7593	92.6481	73.8272	72.9753	48.2593	59.8827	52.0123	26.7407	52.1235	65.9568	141.173	47.4383	14.6543	27.5802	44.4753	51.8148	87.8148
Chr1	1105988	1106638	enhancer	0.238124	402.432	279.37	483.728	589.031	533.877	476.407	446.506	516.247	580.556	512.37	408.963	421.623	413.407	559.642	538.469	659.802	599.383	481.006	534.247	469.728	713.66	478.673	621	476.407	441.759	559.593	430.167	477.148	541.383	422.216	435.025	409.741	680.778	637.451	642.926	768.259	235.049	355.136	429.123	587.191	635.901	541.642	869.84	848.815	648.556
Chr1	1108416	1109812	promoter	0.113649	1215.7	832.123	1410.99	1218.42	1242.73	1290.48	1287.35	1351.06	1430.02	1357.97	1252.87	1309.98	1065.95	2343.4	2170.4	1308.49	1265.1	2611.52	2354.06	2474.59	1228.15	823.457	1457.91	1830.01	1880.2	1797.12	1240.09	1129.35	1227.27	1158.7	1014.33	1015.69	998.42	1045.86	999.741	1131.89	596.111	1113.77	857.111	855.556	915.809	864.883	1688.36	1653.91	1912.57
Chr1	1113918	1114697	promoter	0.252323	345.13	272.889	308.599	324.568	330.383	421.642	421.019	460.759	502.426	446.037	428.235	407.074	446.556	424.802	400.58	277.117	363.679	371.938	436.938	476.309	277.704	244.13	390.444	337.617	349.735	373.617	351.321	401.006	332.346	323.407	404.494	303.543	317.735	358.457	343.272	366.333	272.198	405.012	257.512	348.154	310.432	354.79	440.031	422.414	481.185
Chr1	1120840	1121694	promoter	0.227229	565.506	303.883	133.667	144.512	190.42	252.278	246.321	191.765	247.309	289.5	233.593	260.716	180.012	431.16	446.198	191.488	206.111	405.63	457.951	466.148	211.148	140.056	392.914	341.642	362.722	239.37	238.488	211.648	225.636	166.698	199.457	202.889	153.475	186.556	189.037	395.198	195.969	224.877	171.333	184.698	200.975	241.056	914.63	788.377	1085.94
Chr1	1122416	1124806	enhancer	0.270563	1468.7	501.796	986.475	759.21	844.988	539.802	613.827	677.321	555.309	663.827	537.247	550.136	527.062	1336.26	1385.53	452.241	384.951	553.574	803.543	764.988	436.895	298.617	651.34	740.494	706.265	682.877	496.938	563.185	732.074	535.333	406.938	535.049	451.667	516.16	502.667	579.049	634.333	695.802	610.759	355.506	364.981	367.198	1383.28	1437.48	1789.15
Chr1	1125117	1125714	promoter	0.265573	462.278	299.358	343.383	285.691	283.475	292.765	385.716	356.222	335.333	377.938	300.951	287.469	263.296	292.204	435.617	365.654	404.827	523.099	370.42	527.802	357.543	257.444	419.21	501.062	527.741	453.358	339.938	393.111	415.975	349.333	355.074	412.617	409.179	459.58	421.506	551.42	309.494	312.938	165.938	402.432	342.383	315.136	675.012	642.358	868.852
Chr1	1129179	1132948	enhancer	0.138336	4259.32	2686.17	4379.02	4272.32	3995.47	5837.99	3241.58	5790.44	3991.48	5841.91	3432.01	3757	4734.84	5077.79	5412.46	4374.94	4491.74	4113.89	4742.83	4022.23	3991.48	3385.93	3867.78	4036.48	3926.04	4812.35	2958.28	3459.82	5033.09	3812.79	4018.75	2936.21	2931	3465.31	3538.9	4701.94	3554.47	4617.16	3905.64	2508.52	2727.16	2833.8	4003.56	3999.58	3490.64
Chr1	1133735	1134892	enhancer	0.26286	521.481	460.444	553.049	630.951	541.346	807.765	472.444	740.012	453.068	706.481	548.037	516	606.593	666.741	555.815	478.407	552.383	371.938	478.586	604.753	470.309	273.37	696.099	505.037	494.407	552.383	749.062	773.37	1992.2	754.556	848.988	1686.75	992.63	1229.49	1091.28	1441.63	1323.75	1330.43	899.691	1469.85	1266.52	1087.9	790.321	708.543	796.086
Chr1	1135477	1136156	promoter	0.294175	1029.27	559.179	448.827	489.506	458.123	945.278	518.531	858.438	753.716	1004.05	558.741	662.852	934.815	1260.14	1124.86	439.926	488.728	1061.58	1174.43	1001.25	494.969	437.926	908.593	809.654	782.173	766.914	207.444	213.796	574.475	519.278	459.395	300.272	319.272	335.309	356.222	309.907	358.704	556.673	612.383	199.185	203.37	210.481	219.191	185.654	101.21
Chr1	1139681	1140491	enhancer	0.254095	964.37	504.16	705.352	839.037	741.543	910.654	755.698	849.704	1033.44	1078.52	770.173	825.636	839.691	994.691	900.648	911.049	940.679	1096.19	956.969	910.407	964.154	678.512	1039.12	859.123	1059.64	871.722	615.494	743.025	889.019	749.395	652.815	728.383	776.198	861.716	814.84	958.241	759.321	903.802	733.704	823.457	772.531	697.679	894.377	882.531	1048.07
Chr1	1140862	1141871	promoter	0.23767	678.772	622.667	1071.33	945.889	765.802	1051.09	859.858	762.951	898.889	915.086	778.772	802.438	832.086	848.815	830.963	1246.12	1148.65	1019.2	928.914	889.623	1281.22	1029.94	1209.55	941.605	933.395	845.111	840.253	930.321	679.086	584.907	455.198	635.136	702.191	681.346	646.827	1267.01	549.358	648.494	414.346	759.679	743.111	720.012	989.556	1020.53	1013.55
Chr1	1142854	1144267	promoter	0.154108	2595.53	2366.14	2841.99	2819.09	2650.19	2522.6	2796.63	2673.85	3023.4	2931.86	2506.64	2355.38	2454.11	2570.01	2806.46	4060.33	4202.94	3514.4	3055.53	3463.86	4153.21	3025.63	2929.1	3034.57	3383.88	3097.75	2528.54	2713.85	3258.6	2886.52	2791.49	2900.15	2819.09	3185.65	2968.56	5173.83	2196.35	2771.06	2440.6	2773.47	2547.51	2527.67	3655.3	4138.53	3716.14
Chr1	1146347	1147190	promoter	0.225777	749.148	626.099	814.272	754.821	743.802	804.012	633.79	670.272	750.21	846.012	917.074	753.642	824.531	1121.73	1297.19	727.877	684.16	1394.1	1586.56	1540.52	687.321	661.093	1312.21	1335.2	1090.26	1017.37	372.642	511.586	728.778	769.099	693.543	422.58	316.253	317.278	327.648	758.321	466.142	650.204	578.426	199.185	174.383	214	296.488	266.185	350.272
Chr1	1148371	1149698	promoter	0.282016	461.556	226.389	748.691	701.148	540.012	466.321	459.951	470.481	429.741	450.531	428.235	451.463	432.012	450.111	636.562	731.531	752.216	613.296	676.272	678.66	736.975	732.981	633.679	548.852	584.407	571.173	382.549	367.247	363.358	318.469	305.877	316.012	346.198	382.759	340.951	561.802	290.086	419.395	222.944	313.481	308.667	279.617	395.173	398.593	358.42
Chr1	1154303	1155400	promoter	0.133235	702.994	609.148	931.111	1076.73	947.185	743.21	852.457	789.241	864.204	707.136	890.111	766.037	603.815	864.753	958.284	864.272	1123.98	848.667	1218.6	1079.31	876.543	628.444	1246.02	1006.06	1230.88	973.648	588.012	645.741	879.673	838.284	837.988	1156.63	728.037	787.667	772.475	773.778	529.531	636.235	857.877	700.852	625.63	598.025	809.654	828.605	779.975
Chr1	1155949	1156856	promoter	0.301128	120.605	118.444	383.673	508.179	264.198	207	282.512	248.938	178.963	192.111	190.63	193.093	204.938	230.753	247.407	535.963	526.951	246.877	250.025	299.037	626.593	461	350.568	222.963	318.099	308.247	226.753	182.932	93.7654	77.2469	122.432	193.951	247.988	257.531	239.593	240.463	123.716	136.981	103.506	377.568	266.975	252.012	236.377	257.444	223.901
Chr1	1157563	1159529	promoter	0.150022	1171.49	778.154	1344.3	1354.54	1336.83	1086.09	1098.02	1079.6	1282.02	1207.15	1119.11	1125.6	973	1866.01	2223.12	1393.73	1511.22	1978.74	1918.83	2110.93	1377.28	1077.64	1741.93	2076.02	1797.41	1766.91	1085.17	1178.1	909.914	958.864	945.531	1027.65	857.111	868.333	884.074	1350.44	679.988	939.765	715.093	850.821	792.173	670.741	3811.8	3652.57	3696.79
Chr1	1161787	1162374	promoter	0.295725	342.401	238.58	380.259	385.457	414.383	225.809	232.988	218.432	252.346	286.309	256.889	217.827	226.074	641.099	583.222	222.42	206.111	427.71	415.889	466.148	204.062	168.71	328.753	475.457	359.938	422.741	172.037	184.846	169.494	180.537	260.123	216.383	176.284	148.932	154.691	281.062	98.3025	170.654	132.049	147.074	146.605	127.704	174.494	194.191	204.056
Chr1	1162671	1162882	promoter	0.298532	175.654	90.3086	83.9753	95.6173	119.691	137.414	88.5123	134.716	195.889	140.321	157.698	153.265	141.636	462.469	254.556	93.2963	126.037	174.63	147.123	156.247	65.3457	49.0679	132	122.815	117.296	149.358	63.2346	124.667	90.3025	116.691	78.0988	83.5926	51.858	37.0617	30.4074	39.463	54.5679	113.605	104.099	26.4198	44.2222	44.4198	161.444	139.704	139.444
Chr1	1164593	1165349	promoter	0.248798	483.617	346.037	315.889	328.414	278.148	287.309	346.784	366.235	372.364	375.728	291.562	338.895	322.802	372.037	463.815	375.926	457.198	470.975	485.185	338.716	406.741	290.401	577.586	466.235	539.765	637.111	431.037	473.728	623.84	471.407	457.753	800	507.025	621.086	532.012	583.296	406.827	555.241	494.994	515.802	499.784	460.704	421.457	504.093	431.111
Chr1	1166581	1167655	enhancer	0.194827	641.667	399.346	715.519	713.395	637.111	666.259	622.704	605.914	619.284	677.907	607.259	609.679	625.247	916.71	718.432	840.525	788.296	691.241	781.611	755.654	829.531	532.667	631.951	654.259	611.333	713	618.815	522.272	609.728	590.025	368.938	674.407	569.796	561.426	541.383	900.296	559.426	656.574	459.407	518.389	450.642	494.642	734.901	756.253	674.154
Chr1	1168757	1170043	promoter	0.241209	540.543	301.667	741.877	666.654	518.704	891.648	538.068	736.241	603.667	985.846	742.691	842.068	830.784	1344.46	1076.27	326.432	477.5	913.451	1091.86	879.963	418.383	383.494	922.469	740.494	639.92	686.148	384.642	572.444	735.809	686.642	699.889	397.79	554.438	533.988	534.827	410.815	544.994	747.691	586.519	389.068	414.531	376.654	845.494	749.728	796.086
Chr1	1170530	1171034	enhancer	0.29998	249.253	187.432	347	337.716	255.71	253.667	274.222	269.519	276.63	340.562	316.58	332.951	294.543	328.802	323.809	357.833	353.778	405.63	286.938	431.463	585.321	369.914	253.093	483.556	393.741	433.37	189.247	232.617	161.228	190.926	190.951	124.321	236.111	252.457	240.383	399.593	109.074	166.617	175.284	270.333	297.889	287.969	236.377	203.593	233.284
Chr1	1172653	1173644	enhancer	0.167745	409.383	377.222	553.049	444.617	551.531	476.407	399.71	492.407	480.883	569.679	411.605	544.272	435.877	1248.67	1105.28	542.938	637.383	1010.16	1203.43	1094.63	565.259	445.074	801.556	862.778	850.574	787.84	345.309	475.506	439.284	462.728	350.673	466.963	349.179	354.574	405.79	328.877	256.642	325.253	250.049	377.568	427.543	412.574	1579.27	1693.51	1944.46
Chr1	1174411	1174759	promoter	0.289629	70.1728	19.4815	65.6173	61.9136	98.1481	76.0494	61.537	50.6543	86.7901	103.716	75.5309	89	76.5556	137.037	138.08	73.5432	59.1975	159.722	250.025	167.568	79.5679	104.16	70.7037	182.765	109.648	144.944	90.8642	117.056	84.5494	83.0123	95.1481	98.0617	131.852	145.062	123.852	48.1358	57.9259	107.605	76.2716	124.481	132.049	117.074	236.377	218.444	271.975
Chr1	1183660	1183993	promoter	0.301422	131.074	105.519	98.5432	86.7531	108.074	171.056	136.981	123.074	157.321	128.741	191.877	137.469	196.938	246.642	249.216	118.451	135.352	325.012	408.494	342.42	107.185	104.16	155.346	240.395	221.228	297.753	185.444	167.111	147.21	125.191	190.593	175.043	151.827	153.519	151.525	66.1358	91.1173	121.068	132.049	75.8333	146.605	113.525	185.815	218.136	252.87
Chr1	1185476	1185962	enhancer	0.294311	140.728	169.901	111.741	89.0679	91.2469	233.16	228.506	261.864	300.741	259.284	211.63	232.469	173.852	299.062	181.84	136.309	141.864	189.556	190.957	245.123	154.605	81	279.765	281.123	227.383	253.525	383.543	329.136	154.198	141.864	169.735	156.086	115.463	123.815	123.852	95.6173	83.7531	175.975	128.901	188.296	146.605	134.716	211.284	197.321	151.228
Chr1	1188082	1189417	promoter	0.129231	1198.72	957.056	902.272	1105.06	948.179	1926.22	1394.65	1743.84	1615.58	1621.93	1433.78	1771.33	1486.21	900.648	1015.14	974.901	1040.69	1298.47	1229.49	1086.09	848.926	701.827	1298.05	1312.21	1353.23	1170.1	1743.72	1916.49	1352.27	1414.41	1224.25	986.691	1140.19	1093.33	984.877	1295.86	852.92	1403.16	1257	1356.8	1434.11	1364.14	1133.07	1206.62	1148.52
Chr1	1191058	1191913	promoter	0.143011	940.198	1134.02	814.272	648.852	571.728	1318.25	1079.65	958.395	1282.02	1161.03	950.827	1111.09	1139.74	720.543	651.852	1246.69	1096.75	922.469	901.148	817.247	1159.49	914.901	792.519	794.802	936.475	750.864	1349.49	1240.37	1134.7	1026.93	1003.26	1120.56	1106.56	1137.99	1110.02	1766.63	811.667	1046.29	998.42	1050.4	1007.13	1159.28	946.549	872.63	935.086
Chr1	1193601	1194352	enhancer	0.188593	430.951	414.531	459.71	548.593	451.938	592.185	619.605	605.914	624.37	714.086	535.988	550.136	471.753	612.488	536.815	661.827	736.049	623.117	651.741	661.16	721.185	573.63	611.358	650.173	598.062	640.765	730.716	781.667	676.321	521.358	583.173	534.074	756.92	815.284	799.852	960.617	352.364	405.012	385.556	870.63	753.037	666.123	813.883	886.593	910.599
Chr1	1195580	1196065	enhancer	0.299322	207.185	133.71	148.395	189.827	240.914	159.765	231.506	189.247	219.457	220.086	221.21	212.704	219.975	444.173	471.383	179.21	204.253	232.475	444.16	427.543	160.716	114.562	268.167	308.698	215.191	272.827	119.068	172.642	116.247	111.37	124.667	119.691	157.475	159.481	149.994	225.136	80.0988	101.333	100.778	161.346	141.914	159.407	308.932	311.679	333.753
Chr1	1197392	1198532	promoter	0.1663	618.914	451.753	676.321	722.568	685.438	1337.4	991.358	1176.14	1349.72	1335.4	1100.9	1228.67	1125.81	844.278	860.691	528.278	597.031	718.593	791.296	718.84	451.593	380.747	551.333	488.568	443.901	649.185	857.29	1135.63	727.16	689.679	820.148	600.198	531.543	669.87	585.086	768.259	437.019	895.29	677.654	660.148	675.519	792.716	1411.36	1300.07	1405.28
Chr1	1200919	1202523	promoter	0.174895	1387.25	782.432	1068.4	1018.19	1040.41	1782.06	1161.7	1551.7	1726.15	1686.03	1374.6	1583.98	1504.67	1731.95	1902.09	809.537	790.802	1776.42	1931.57	1957.54	611.778	721.315	1582.72	1699.81	1366.12	1499.42	1017.38	1001.97	797.198	875.802	666.654	732.006	502.463	552.519	575.494	624.852	677.858	1181.62	838.778	456.284	410.623	416.84	1493.26	1333.35	1589.81
Chr1	1205718	1207582	promoter	0.201772	871.42	377.222	606.333	548.593	556.401	1277.1	699.605	890.593	1011.22	957.617	780.123	1010.22	774.957	1125.95	1119.56	426.549	493.506	1088.41	1130.67	1062.89	388.469	432.346	912.901	983.864	862.938	1058.28	590.136	640.037	378.191	407.043	396.519	391.691	343.765	366.543	350.741	338.877	420.654	719.346	395.728	328.401	274.111	271.778	1459.19	1356.59	1868.99
Chr1	1215313	1216399	promoter	0.102822	1594.94	1566.96	1058.53	975.531	881.778	2593.78	2159.56	1906.44	2355.89	2169.51	1813.19	1952.21	1983.96	524.025	723.426	1662.78	1604.6	966.556	874	771.142	1762.41	1449.57	827.58	857.568	883.42	908.309	2311.95	2109.37	1432.52	1291.33	1079.86	1154.28	1877.12	1857.36	1733.62	3180.67	1494.69	1351.43	1489.17	2365.48	2240.81	2247.41	1026.93	1002.17	996.679
Chr1	1220163	1221464	promoter	0.230152	652.58	356.975	735.284	744.846	829.802	483.346	522.691	576.204	549.901	619.395	626.142	565.741	538.074	1199.66	1134.55	326.864	394.969	832.086	991.241	1011.9	379.691	235.63	1410.12	1019.64	1057.02	878.988	336.278	347.938	508.988	479.938	515.679	355.253	336.185	339.512	306.068	243.074	337.37	391.58	188.346	225.772	296.204	189.247	448.784	447.377	481.185
Chr1	1222152	1222632	enhancer	0.303617	275.877	180.302	301.296	214.16	149.309	245.963	279.506	244.827	274.877	258.457	224.309	268.037	243.136	174.401	167.451	206.148	137.309	232.475	240.481	161.568	237.716	168.71	301.827	285.302	321.185	264.741	171.117	198.216	206.519	200.16	151.765	229.654	184.148	213.525	195.556	238.025	214.321	151.556	147.951	219.056	260.654	217.321	174.494	190.463	151.228
Chr1	1224317	1225045	promoter	0.196598	505.358	530.062	426.42	373.926	459.494	411.475	516.296	420.84	524.432	551.093	414.821	410.012	359.284	737.519	781.809	706.222	732.006	756.5	895.512	787.265	776.741	540.358	761.302	807.123	847.772	1340.57	421.481	404.395	618.605	604.123	563.42	517.728	495.741	606.519	509.716	727.068	360.809	493.994	451.444	510.895	481.642	433.309	742.802	696.444	771.765
Chr1	1226094	1226890	promoter	0.217495	436.963	303.883	511.586	404	365.926	323.352	402.222	444.284	409.407	439.648	387.395	335.358	383.938	694.099	734.747	553.37	523.154	949.062	676.272	771.142	473.494	336.426	613.049	653.29	577.29	567.586	402.87	411.327	567.71	550.185	546.173	538.84	603.611	559.728	574.117	627.191	381.062	501.58	294.747	474.432	469.426	332.747	508.593	531.407	599.654
Chr1	1230758	1231835	promoter	0.254565	268.358	175.111	429.728	448.667	372.383	365.901	293.951	331.259	316.901	343.537	442.889	369.444	317.031	343.309	342.383	268.753	215.716	174.63	322.136	194.438	221.667	153.722	321.963	224.259	258.457	188.704	353.469	358.988	338.895	270.66	220.864	361.562	300	317.278	292.074	471.568	364.84	459.247	415.568	389.068	432.111	435.426	798.358	859.704	842.284
Chr1	1232058	1233998	promoter	0.193415	1060.17	852.963	1569.51	1573.45	1299.63	1115.33	1206.75	1221.85	1210.25	1163.69	1252.87	1212.44	1175.06	1039.68	1008.2	1158.04	1188.98	1001.37	889.42	940.198	1092.04	901.383	1349.81	955.593	1052.2	1291.33	1243.19	1013.35	1585.93	1117.92	1240.2	1297.72	1182.73	1311.57	1239.99	1860.11	1406.66	1453.91	1265.02	1523.74	1513.82	1513.02	1331.99	1285.89	1202.42
Chr1	1235789	1236938	promoter	0.117497	1135.52	1027.48	959.988	1063.33	1055.56	1101.04	1306.31	1243.78	1127.53	1120.44	1189.43	1142.3	1166.8	1075.27	1107.01	1329.19	1378.26	1800.69	1454.96	1528.8	1266.96	882.914	1842.15	1564.46	1508.12	1666.33	1147.12	1084.5	1589.3	1498.36	1553.59	1499.9	1168.51	1281.81	1279.88	1778.65	1251.86	1373.31	1319.36	1540.72	1603.99	1436.17	1588.94	1712.4	1419.94
Chr1	1238574	1239274	enhancer	0.294045	375.012	268.21	326.37	327.123	301.111	330.667	315.179	348.444	429.741	391.679	335.062	328.981	337.012	379.025	386.914	548.407	533.012	449.877	268.383	259.951	498.679	346.667	279.765	265.346	338.327	415.198	235.574	279.765	232.13	217.556	220.864	262.654	289.049	295.827	286.568	428.617	240.512	228.346	92.216	339.642	286.099	371.37	194.086	236.778	204.056
Chr1	1239956	1240724	promoter	0.260131	354.469	363.383	445.512	460.846	486.136	310.759	369.58	401.506	404	323.852	359.716	366.951	359.284	406.185	443.148	446.741	431.802	602.259	444.16	456	402.488	331.222	441.21	480.148	370.333	477.92	274.444	346.111	415.975	382.444	339.414	445.395	333.988	319.099	356.679	395.198	305.049	361.08	339.29	404.654	337.278	300.315	683.667	657.827	574.049
Chr1	1242082	1242843	promoter	0.251878	332.012	372.216	305.13	243.13	323.469	285.975	252.395	264.074	353.5	265.963	256.889	284.698	306.531	412.537	459.821	304.852	242.296	481.006	608.302	482.87	248.148	238.383	668.938	560.753	434.272	418.895	227.895	196.401	290.037	313.58	319.062	236.383	195.481	195.833	179.475	250.79	255.988	288.519	299.407	188.296	161.278	192.296	711.852	680.617	665.938
Chr1	1244135	1244726	promoter	0.304153	199.444	182.84	216.772	195.346	226.481	189.247	211.426	213.111	237.463	218.179	188.309	225.914	202.599	313.444	242.802	182.704	213.765	103.821	250.025	183.975	194.284	153.722	222.63	218.864	224.16	264.741	136.265	209.772	288.025	225.475	252.87	227.327	243.988	294.79	221.222	263.864	227.247	192.926	121.235	348.154	326.864	274.407	345.827	410.605	422.34
Chr1	1246355	1247057	enhancer	0.298912	117.049	95.3086	207.148	232.784	137.79	128.235	148.265	138	110.377	110.741	99.2593	133.506	141.636	190.327	167.451	172.142	151.827	159.722	180.043	146.049	155.383	137.284	217.543	201.111	162.778	136.765	93.6358	122.864	90.537	81.9259	74.2963	104.012	98.3765	98.7654	63.2469	195.333	111.926	112.21	44.5309	571.556	568.383	485.099	278.543	212.309	162.506
Chr1	1248473	1249564	promoter	0.133598	763.741	481.012	560.556	514.568	576.346	467.617	498.173	600.21	698.426	631.395	643.043	576.457	589.722	1534.48	1209.78	545.043	524.975	949.062	934.951	1183.67	456.247	467.938	1181.57	981.296	1090.26	1215.43	458.259	469.728	489.037	450.012	410.123	726.568	479.852	525.963	592.932	275.877	393.741	476.296	404.617	1187.52	1123.98	1180.97	1994.19	1921.94	2241.3
Chr1	1257472	1258740	promoter	0.232051	237.58	212.031	297.611	288.593	253.012	309.58	320.741	284.099	270.222	279.142	298.099	316.457	290.759	238.704	188.617	374.79	334.395	218.272	211.105	183.975	360.988	246.92	359.481	244.593	282.444	349.71	272.549	234.605	260.204	267.099	267.889	249.395	270.716	321.586	277.463	336.321	210.704	202.086	172.562	339.642	345.833	388.346	746.475	773.37	657.42
Chr1	1261122	1261964	promoter	0.127319	614.914	750.142	685.914	570.537	613.401	629.753	713.66	633.272	737.086	698.111	622.173	653.864	674.593	1222.57	1239.94	1400.33	1158.7	2023.25	1248.99	1547.07	1218.78	880.543	724.123	1074.92	990.037	896.728	522.691	620.877	958.241	968.654	910.981	1148.01	908.235	982.309	878.667	854.944	492.525	540.889	537.568	992.864	896.926	981.741	1058.8	1171.61	1048.07
Chr1	1272306	1272938	enhancer	0.279539	205.42	372.216	222.722	217.228	210.012	224.457	303.414	265.84	257.401	231.79	180.235	294	233.519	379.025	511.346	373.481	344.136	553.574	712.667	752.753	320.926	270.642	522.463	542.383	561.827	595.975	176.667	151.346	236.204	228.605	288.389	186.63	255.37	234.21	243.988	90.1852	157.698	158.062	165.235	254.901	194.012	203.815	386.914	313	306.722
Chr1	1273861	1274543	enhancer	0.291637	151.296	182.84	195.623	173.623	134.802	130.944	177.407	164.772	183.457	172.123	147.074	174.333	158.481	385.741	482.253	272.642	306.272	591.957	534.247	577.16	383.272	298.617	374.907	590.525	577.29	574.66	183.667	149.395	328.074	281.605	212.309	283.296	363.568	401.593	388.469	297.667	216.235	235.457	171.975	416.537	354.599	311.926	260.321	292.284	252.87
Chr1	1275253	1275793	enhancer	0.282575	154.407	204.765	67.8519	87.7654	93.0432	151.062	163.951	155.364	138.494	178.901	106.543	145.525	124.111	437.63	485.099	147.383	200.204	481.006	588.654	673.346	178.025	228.426	724.123	574.296	639.92	527.438	94.4815	88.6296	159.358	173.259	150.593	134.802	109.531	81.679	100.327	57.8395	73.3457	83.463	117.481	86.9753	80.6235	35.9012	87.6914	127.321	87.8148
Chr1	1280481	1281589	enhancer	0.209661	219.938	319.802	297.611	249.185	183.735	199.37	300	274.284	208.296	222.358	219.358	204.957	228.784	214.963	319.63	400.383	394.969	218.272	370.42	311.864	407.395	284.414	339.642	350.025	425.29	477.92	254.383	194.525	473.117	396.543	375.062	441.099	442.605	469.383	510.938	466.704	359.796	341.407	275.815	438.222	449.228	475.79	845.494	963.642	895.247
Chr1	1286254	1286459	promoter	0.301189	23.6358	23.0432	48.9877	32.7778	36.6852	34.037	36.4444	41.5617	38.6605	55.8025	38.6605	34.8827	56.4198	97.9259	60.7593	70.358	51.5309	103.821	72.8519	49.7654	72.4938	55.5679	40.8395	53.679	61.6296	35.0864	47.4444	36.2222	26.179	25.3827	31.1605	28.3457	42.5802	45.4753	59.3704	39.463	11.9259	11.284	18.9877	116.228	60.0556	48.4568	66.4136	60.5617	17.6481
Chr1	1290773	1292379	promoter	0.111715	949.815	1171.05	1420.28	1239.56	1167.9	1306.74	1326.09	1227.73	1335.1	1254.59	1111.77	1291.72	1370.36	989.605	1073.63	2075.41	1961.49	1623.37	1352.09	1287.97	1979.27	1407.24	1413.21	1567.58	1848.63	1106.15	1523.98	1326.26	1117.96	1086.01	1169.52	1208.52	1220.44	1135.69	1088.25	1888.11	1084.09	993.525	1025.62	1485.89	1445.56	1375.78	1285.56	1467.69	1397.07
Chr1	1293247	1293476	promoter	0.305045	35.7407	74.5309	70.284	40.9383	71.037	52.9506	51.6975	42.8765	60.0741	55.8025	66.3765	64.9938	44.963	51.7222	72.6173	58.9012	43.4938	36.7284	180.043	81.1111	51.5185	55.5679	94.6296	70.5185	99.2593	76.4568	69.5432	52.1543	109.012	83.0123	61.2346	104.66	54.5247	61.5802	60.4815	98.2593	76.2593	68.7963	91.7531	101.895	121.5	117.074	77.3827	83.2963	74.1728
Chr1	1298708	1299775	promoter	0.2035	276.519	144.623	241.556	329.593	351.235	296.407	286.833	356.222	303.883	385.765	312.562	325.037	311.951	635.765	619.926	298.321	322.864	591.957	588.654	750.142	285.901	193.457	460.901	562.716	676.469	758.654	516.074	608.765	595.778	486.827	464.877	605.21	564.802	635.525	528.481	380.142	427.506	535.802	404.012	441.006	378.432	376.654	687.716	696.148	895.247
Chr1	1302909	1303559	enhancer	0.281426	217.42	113.136	163.185	173.623	172.123	300.383	193	263.58	297.333	325.84	316.58	291.099	321.586	343.309	277.185	138.994	122.241	204.333	250.025	245.123	94.7593	97.1235	195.407	184.148	162.778	172.981	225.741	272	197.056	170.407	159.79	170.198	195.481	157.185	194.716	114.543	167.642	220.235	161.407	184.698	192.049	166.012	724.895	586.216	886.167
Chr1	1305385	1309817	promoter	0.191682	2913.75	1968.74	4512.21	4519.48	4236.87	3603.65	3201.71	3672.69	3577.65	3524.59	3956.99	4214.98	3595.75	2773.05	2850.25	3469.19	3396.41	2229.02	2446.86	2864.15	3117.63	2688.16	2968.1	2899.28	3060.75	3698.64	2875.22	3078.11	2962.19	2966.5	3315.33	2133.34	3008.78	3305.2	3237.49	3587.99	2847.15	3085.63	2478.67	2343.09	2323.56	2194.09	2280.4	2441.49	2090.32
Chr1	1310741	1311311	promoter	0.287345	124.802	100.21	151.506	164.08	156.21	217.92	173.593	209.296	207.284	216.975	196.173	182.765	228.784	263.16	173.352	183.704	153.901	218.272	268.383	167.568	194.84	145.346	259.481	246.963	252.654	287.259	364.901	436.784	415.012	227.469	295.259	347.506	381.691	477.481	428.778	357.321	211.988	221.802	239.117	555.753	556.086	559.321	1108.28	1206.12	1234.65
Chr1	1312499	1313858	promoter	0.191305	1833.58	1951.41	1841.75	1838.2	2014.17	1822.12	1711.74	1694.75	1793.65	1745.38	1833.93	1809.56	1845.46	1823.48	2063.01	2537.18	2440.86	2344.52	2268.33	2486.41	2321.74	2001.98	2938.46	2413.8	2563.46	2261.65	1547.07	1986.67	2835.64	2433.97	2541.2	2665.77	1939.46	2058.63	1876.07	2360.81	1770.36	2175.62	1730.45	1742.24	1878.45	1722.59	2991.85	3222.85	2997.73
Chr1	1315545	1316170	promoter	0.293566	157.901	162.296	101.006	159.488	177.34	182.494	174.951	157.698	231.204	218.179	246.012	197.395	215.198	198.79	229.728	115.086	88.3827	218.272	268.383	375.099	119.741	109.185	319.574	237.049	212.086	204.272	146.716	165.062	137.654	130.914	158.099	144.302	126.198	127.833	122.833	215.105	113.074	162.321	200.827	116.228	149.315	232.333	826.846	665.988	762.765
Chr1	1320340	1322173	promoter	0.143668	1098.32	1168.98	1718.9	1704.23	1508.31	1269.98	1490.56	1410.01	1454.96	1366.83	1049.24	1223.28	1005.52	1244.6	1135.75	1794.07	1613.4	1831.4	1208.18	1196.49	1645.59	1232.2	1688.59	1296.77	1347.88	1300.15	1233.78	1238.49	1170.04	1265.59	1206.67	1172.14	1360.31	1456.74	1468.99	1397.84	963.642	1051.32	970.568	1302.4	1084.91	1270.16	1386.77	1500.75	1141.27
Chr1	1324524	1325289	enhancer	0.230986	548.852	571.481	260.549	276.827	233.284	588.42	497.438	428.679	528.981	493.957	479.914	540.481	397.272	214.963	274.963	376.728	371.049	260.167	258.969	199.401	364.457	263.136	296.062	280.012	338.327	264.741	727.037	663.148	449.611	453.926	488.667	402.593	381.691	397.815	381.21	1066.23	551.531	630.963	536.42	467.747	501.407	531.864	264.481	247.988	297.321
Chr1	1330897	1331847	promoter	0.201371	488.025	433.728	603.346	662.667	499.636	739.241	610.833	542.111	618.864	632.963	559.58	619.753	547.481	547.025	500.284	799.512	744.148	664.025	561.099	502.117	698.938	534.975	525.685	483.556	497.056	430.148	535.654	570.605	392.259	375.481	361.173	486.864	435.29	536.914	443.802	704.309	366.025	326.963	592.086	539.42	478.759	584.852	485.185	538.241	514.062
Chr1	1333247	1334085	promoter	0.182142	607.389	507.679	570.16	618.333	593.914	684.907	630.519	641.636	676.827	573.944	623.444	525.037	582.506	672.222	774.519	792.827	670.531	572.284	595.278	563.667	727.037	519.722	615.074	592.475	655.84	671.5	620.827	667.469	733.827	701.457	623.988	917.79	887.383	875.198	886.519	883.753	467.852	537.586	517.315	1038.46	1050.67	953.636	1278.43	1252.09	1013.55
Chr1	1336170	1336599	enhancer	0.304646	201.111	274.981	189.284	160.901	172.951	166.142	240.123	173.407	226.691	231.012	243.895	147.173	206.173	336.056	179.34	247.617	224.519	159.722	240.481	189.247	211.679	148.296	349.71	200.025	218.037	264.741	174.333	167.111	167.543	92.6481	86.5185	240.383	99.0988	132.012	128.123	263.864	221	130.679	153.556	116.228	106.358	109.753	417.691	449.395	489.42
Chr1	1337571	1339567	promoter	0.121034	2236.61	1851.73	2142.53	2144.09	2183.57	1901.63	2076.25	2038.7	2228.02	2158.62	2103.91	1681.98	1970.19	2656.52	2776.8	2197.69	2028.52	2229.02	2661.41	2639.7	1998.31	1580.94	2464.37	2322.11	2527.05	2522.89	1496.74	1645	1815.36	1572.31	1682.47	1969.54	1145.8	1186.55	1216.86	2042.35	1441.63	1604.85	1517.59	913	879.827	882.21	4021.02	4021.02	4337.58
Chr1	1343396	1345331	promoter	0.125884	1868.6	1206.84	1751.84	1687.72	1820.72	1966.05	1994.53	1844.54	2426.07	2221.58	1928.19	2017.58	1808.99	2700.85	3016.01	1584.65	1638.29	3501.32	3217.23	3447.63	1596.49	1176.08	3053.1	2891.32	3154.72	3075.01	1570.07	1361.95	1157.3	1140.74	1162.9	1300.22	895.173	973	933.679	904.475	1004.22	1426.23	1368.67	850.821	870.469	824.605	1927.73	1852.01	1966.05
Chr1	1349596	1350531	promoter	0.125458	714.938	517.704	758.593	723.926	672.296	775.253	918.926	809.877	938.056	911.272	804.802	739.42	797.006	1172.51	895.778	856.444	831.34	1193.51	1174.43	1122.42	786.519	597.778	864.883	904.605	853.198	819.802	787.951	916.432	899.525	833.722	764.735	930.988	860	889.92	949.531	508.593	540.926	709.506	481.012	769.469	726.043	787.333	993.525	1064.11	1219.89
Chr1	1355298	1357169	enhancer	0.233917	1916.49	1758.47	2364.14	2590.72	2258.49	2503.25	2717.06	2380.79	2597.42	2489.73	2125.17	2180.87	2209.53	1190.49	1449.11	2498.65	2541.47	1723.67	1347.24	1481.9	2511.31	1631.22	1509.21	1578.04	1678.57	1807.64	2135.01	2331.32	2233.65	1865.9	1844.54	1461.44	1548.46	1667.08	1599.04	2573.67	1254.78	1581.96	1387.6	1597.01	1779.27	1793.35	1831.67	1769.27	1818.26
Chr1	1358215	1358833	promoter	0.265268	274.475	308.444	257.444	284.333	334.204	373.969	409.988	367.259	409.407	379.92	331.63	394.321	326.185	277.815	233.753	333.377	393.093	382.926	354.66	282.84	314.827	293.488	394.074	369.364	318.099	363.012	428.34	515.179	386.222	319.451	311.099	392.852	269.327	290.914	279.543	482.957	278.123	309.753	245.333	407.21	340.864	300.315	949.346	824.722	910.599
Chr1	1361734	1362828	promoter	0.167773	561.198	462.66	459.71	561.031	562.333	600.198	614.66	667.204	687.543	666.407	651.167	635.086	538.074	677.84	766.321	545.043	438.444	632.778	851.444	664.346	513.451	504.975	779.284	780.963	713.309	774.148	607.074	650.395	791.21	572.877	716.136	812.877	647.895	637.451	679.086	602.16	469.759	593.741	499.617	583.086	560.698	574.562	785.691	690.66	787.778
Chr1	1364709	1365333	promoter	0.290946	267.642	241.21	308.599	291.494	275.617	335.148	310.191	254.531	344.815	312.802	283.444	271.086	244.321	43.358	154.562	391.519	347.87	159.722	158.333	209.753	409.235	341.407	268.167	197.623	310.068	212.296	219.086	248.259	231.074	225.475	262.21	270.414	335.556	320.025	288.864	319.062	195.969	180.259	185.34	372.401	403.914	297.148	421.457	472.494	262.741
Chr1	1368457	1369312	promoter	0.152539	758.568	876.062	755.846	714.938	631.889	1005.98	805.84	783.469	915.42	800.704	731.79	708.272	839.691	357.815	437.63	1102.85	1084.43	511.901	492.358	486.444	1082.35	872	804.667	538.728	786.346	556.185	683.778	733.154	837.735	745.16	756.13	883.241	702.191	724.198	679.753	1373.04	601.302	659.988	567.481	734.37	732.198	754.148	613.593	684.58	481.185
Chr1	1375407	1376255	promoter	0.268067	202.827	217.13	399.321	404	286.006	269.519	394.42	314.735	331.148	336.395	271.623	251.617	248.802	336.056	317.327	498.802	455.543	325.012	393.469	264.346	451.049	402.753	350.568	303.481	304.259	323.099	362.969	307.074	265.605	242.753	242.191	367.037	354.16	394.321	336.185	393.049	171.123	161.025	177.204	383.117	301.296	290.914	468.704	487.802	582.84
Chr1	1383485	1383704	promoter	0.299143	37.1173	23.0432	6.44444	3.55556	10.1728	28.5309	22	21.7284	33.1852	29.9383	39.3827	29.0802	42.2963	59.5617	46.1481	4.88889	16.0864	12.321	17.5556	20.3333	11.5556	9.71605	13.2037	13.0679	20.2963	35.0864	22.4938	25.5617	24.6667	27.216	34.037	17.2963	14.6543	18.6296	10.0556	36.3951	15.4568	34.2531	24.3765	39.2099	14.6543	10.2963	27.216	24.463	47.8025
Chr1	1383917	1384179	promoter	0.286234	37.1173	61.3889	91.3704	70.0494	38.6975	51.8025	79.3272	46.6975	67.5926	59.0123	68.8889	39.6358	70.9012	74.679	65.0679	63.5864	83.2716	89.8025	72.8519	86.5679	74.8519	67.6605	74.5679	53.679	61.6296	67.5926	79.1481	82.8642	50	55.4198	55.4198	68.2901	52.8148	79.2469	63.2469	74.5679	50.3704	38.1358	41.2963	83.1914	91.4506	75.2716	71.8765	66.0494	60.9136
Chr1	1385924	1386458	enhancer	0.292133	175.654	241.21	151.506	141.605	135.827	157.29	249.753	192.154	197.543	225.951	239.025	179.475	211.296	357.815	283.79	210.79	215.716	481.006	436.938	624.025	242.778	218.123	531.136	519.327	428.247	353.321	59.1049	134.253	83.1543	98.284	77.4198	80.7654	45.9753	50.1235	71.5679	72.0185	56.6975	74.8519	107.475	65.1728	62.3704	85.4753	87.6914	73.7531	60.9136
Chr1	1390918	1392064	promoter	0.218527	478.272	435.759	632.346	593.827	572.988	497.63	591.988	587.358	628.914	561.173	526.469	518	525.716	284.963	522.272	660.932	653.864	553.574	614.549	557.333	599.074	519.722	480.272	502.889	626.981	731.741	537.753	522.272	642.901	619.815	597.988	563.951	535.988	546.204	550.593	579.049	354.951	489.852	406.981	435.901	387.315	471.16	704.605	721.938	713.494
Chr1	1395769	1396522	promoter	0.276823	123.87	133.71	198.198	185.963	145.728	186.58	226.765	193.556	171.228	201.846	186.988	162.778	140.42	106.148	220.778	263.772	254.673	232.475	240.481	278.759	241.593	204.852	262.049	260.654	338.327	253.525	209.667	283.438	257.432	251.827	189.975	302.025	217.543	250.37	213.58	198	127.309	156.136	154.21	276.086	275.994	260.901	413.765	417.296	548.438
Chr1	1398649	1399505	promoter	0.220686	382.92	451.753	616.395	627.031	442.932	629.753	625.074	534.074	652.704	601.914	564.71	565.741	576.031	238.704	300.012	895.438	908.741	405.63	378.432	378.994	1005.19	640.765	297.093	387.062	365.117	470.432	601.191	648.667	405.16	406.71	427.346	632.358	485.58	588.185	509.716	766.222	290.778	422.636	394.037	703.704	598.469	642.79	308.932	388.66	342.222
Chr1	1400525	1400910	enhancer	0.300283	120.605	147.309	122.506	103.037	135.827	130.944	150.08	143.679	159.889	135.049	154.685	154.765	125.691	106.148	100.802	147.957	133.309	118.185	124.123	130.37	129.691	95.0864	145.691	120.364	121.093	165.543	164.444	90.3457	161.938	161.358	139.623	181.889	145.58	118.691	149.994	130.265	117.049	148.642	121.901	101.895	88.3457	131.222	223.278	230.852	280.031
Chr1	1407178	1408011	promoter	0.166572	453.951	478.809	490.296	519.401	580.63	583.451	658.136	605.914	688.944	597.765	549.475	461.086	577.358	437.63	552.383	521.123	510.914	822.988	534.247	747.111	532.154	429.506	627.049	605.654	690.457	777.617	529.728	540.747	520.605	464.809	476.796	529.531	509.562	504.691	471	449.154	360.809	428.383	386.914	352.951	439.043	424.025	932.889	1039.75	926.191
Chr1	1410426	1411424	promoter	0.10807	1081.3	1043.78	850.432	899.21	784.531	1279.64	1319.51	1203.77	1372.96	1400.17	1227.79	1284.3	1222.99	1376.91	1105.28	1210.12	1191.14	1179.88	1486.85	1430.24	1109.28	851.716	1618.2	1421.72	1430.83	1065.01	884.617	979.864	1190.43	1171.13	1305.43	1473.26	1046.23	1181.33	1091.28	1048.75	708.889	937.648	1029.27	1211.2	1139.56	1113.36	898.481	955.926	981.358
Chr1	1415899	1416523	promoter	0.276583	222.37	214.747	301.296	218.778	248.84	295.049	308.981	306.981	318.414	275.877	279.827	242.191	269.654	222.79	283.79	346.049	362.037	405.63	277.889	230.407	406.321	281.58	417.432	340.506	318.099	308.247	263.981	311.981	280.753	278.796	259.42	293.469	265.062	296.611	282.642	766.222	215.617	261.969	338.148	358.265	257.235	279.617	644.84	620.284	422.34
Chr1	1418127	1419050	promoter	0.212665	854.5	643.16	966.716	878.025	970.074	648.759	774.907	666.241	735.086	686.827	703.778	654.994	786.247	779.84	825.938	913.352	923.988	1163.22	905.63	956.321	881.062	655.086	1007.86	1045	1079.07	1009.57	690.883	744.414	759.5	707.58	684.475	832.963	693.42	748.765	638.099	954.938	520.198	873.198	759.21	745.852	741.735	746	1115.46	1134.23	796.086
Chr1	1421572	1424517	promoter	0.230536	5412.46	4221.99	7426.2	7501.75	9567.43	4647.14	5132.73	5105.01	5603.63	5506.69	5277.19	4977.56	4674.73	6025.84	6442.11	6417.23	6454.37	5471.42	6329.48	5644.85	6070.25	4987.12	5464.27	5620.38	6806.09	7426.2	3330.84	3664.64	5121.83	4835.51	4610.17	5496.91	3648.8	4031.29	3815.65	5166.22	2851.14	3926.98	3188.11	3388.14	3274.93	3365.69	4753.6	5121.83	5030.79
Chr1	1424766	1425503	promoter	0.28246	569.222	385.34	715.519	629.488	799.117	379.531	413.377	421.512	567.185	496.358	560.654	380.352	426.222	1048.93	1078.65	298.321	353.778	782.932	1272.07	1092.51	312.864	304.562	704.642	848.778	736.975	856.414	257.42	340.63	324.821	381.37	415.796	382.784	245.951	267.235	270.216	190.241	225.92	410.444	430.679	147.074	182.784	134.716	573.778	518.975	1085.94
Chr1	1426406	1426972	promoter	0.303961	447.914	470.395	254.198	261.062	311.222	353.728	350.457	364.469	439.691	384.16	379.58	417.938	536.858	699.154	680.093	459.765	552.383	691.241	851.444	664.346	372.259	276	555.111	728.778	527.741	523.012	445.253	513.543	453.457	430.716	508.426	335.994	482.889	584.685	534.827	733.444	368.84	447.877	318.63	273.247	382.272	322.679	244.444	239.679	204.056
Chr1	1428715	1428955	enhancer	0.301908	245.488	343.623	125.512	122	153.037	100.889	145.327	132.284	158.488	140.321	129.173	107.278	89.3086	137.037	201.222	125.272	155.988	89.8025	180.043	240.043	163.475	92.6728	270.259	222.963	288.975	176.71	63.2346	79.142	93.7654	126.926	175.327	93.2716	86.3086	84.7469	83.8704	235.63	72.1728	124.309	56.7284	17.4444	54.8272	51.858	55.7778	45.4938	74.1728
Chr1	1430996	1432096	promoter	0.285334	411.123	286.346	667.63	613.58	508.568	440.802	449.611	401.506	455.895	483.63	450.531	371.377	429.185	246.642	361.481	581.259	604.284	361.216	415.889	416.204	528.852	437.926	396.475	422.957	439.037	453.358	1269.02	1308.16	554.488	493.16	470.037	708.926	594.019	686.185	618.235	1127.1	743.123	1036.06	896.086	674.605	610.068	642.79	440.031	426.741	386.315
Chr1	1432548	1435144	enhancer	0.150223	1595.67	1212.67	2218.92	2176.65	2639.39	1448.99	1791.91	1843.48	1761.9	1687.05	2058.63	1662.62	1818.26	2539.94	2646.98	1533.37	1747.49	2319.28	2458.69	2599.27	1305.37	1188.2	2628.41	2261.02	2577.32	2804.28	3531.88	3941.14	3241.15	3358.7	3545.37	2610.83	3385.93	3495.99	3453.7	2207.69	2457.36	3172.18	2498.65	2417.56	2438.91	2348.36	1697.25	1860.49	1801.19
Chr1	1437332	1437961	promoter	0.292594	238.383	197.438	277.932	201.185	240.914	300.383	335.031	296.043	325.938	312.802	350.056	291.099	355.377	379.025	377.969	174.068	158.333	427.71	588.654	462.691	199.852	182.136	382.444	452.272	489.444	456.809	540.049	666.173	321.562	407.568	382.235	241.556	468.309	523.123	514.21	362.327	283.432	376.957	527.988	389.068	331.926	385.883	312.747	308.247	358.42
Chr1	1441098	1441308	promoter	0.300588	51.8086	72.0988	35.179	39.4198	58.5802	64.9383	66.9568	55.4383	77.5432	59.0123	60.321	64.1975	75.216	66.8889	46.1481	64.9383	70.284	49.9753	41.5185	113.704	85.642	49.0679	48.5864	57.5494	78.1914	35.0864	77.1296	65.9444	31.5062	48.037	69.963	38.0988	54.5247	63.5802	60.4815	57.8395	28.5309	51.3025	89.4198	65.1728	44.2222	71.4198	44.4753	56.5062	101.21
Chr1	1450562	1451252	promoter	0.276184	287.444	279.37	277.932	254.222	294.654	384.543	338.593	338.642	325.556	344.58	283.444	294.821	333.222	365.062	256.574	359.679	376.963	204.333	250.025	204.494	328.185	246.92	429.123	317.432	285.858	161.667	385.889	372.383	310.58	296.654	428.58	370.753	332.111	338.519	337.543	350.531	233.42	282.975	200.827	460.63	387.315	369.235	260.321	306.111	193.679
Chr1	1454562	1455881	promoter	0.280817	628.204	531.926	805.062	740.691	881.778	713.457	631.728	640.395	824.302	762.105	803.457	727.877	722.142	921.148	872.062	508.086	508.506	884.926	901.148	887.222	521.593	429.506	953.636	818.704	958.395	787.84	735.673	716.556	702.79	579.148	626.494	668.549	589.457	550.593	581.667	694.025	577.556	711.333	499.049	558.605	507.728	550.5	865.765	828.16	967.086
Chr1	1456137	1457152	enhancer	0.168896	660.37	714.938	844.58	972.691	976.981	775.253	1091.09	906.42	931.235	979.889	965.623	898.444	724.222	1222.57	1303.38	850.148	881.827	1928.65	1400.69	1595.96	829.531	693.395	1273.74	1552.02	1539.65	1479.67	616.204	613.71	683.827	636.84	664.074	582.84	573.63	560.519	545.012	561.802	502.086	495.444	435.025	515.802	545.623	469.025	704.605	714.753	722.142
Chr1	1458478	1459273	promoter	0.145917	851	883.5	1126.01	1172.57	948.179	1144.67	1177.74	1102.02	1299.8	1244.54	1033.98	1056.19	1014.77	715.475	664.457	1967.16	1708.38	1061.58	730.556	678.66	2080.72	1430.74	851.284	860.654	936.475	885.926	1147.12	1180.54	1333	1109.91	1265.3	1526.88	1623.23	1832.23	1702.23	1480.01	779.136	756.519	797.154	1634.69	1699.06	1651.79	1197.44	1316.52	1093.8
Chr1	1461940	1463398	promoter	0.146369	1034.32	1018.78	1463.01	1379.31	1411.79	1188.98	1320.12	1257.28	1350.99	1408.54	1090.86	1142.3	1063.22	1349.54	1615.91	1352.75	1446.14	1430.24	1466.43	1511.91	1381.06	1214.76	1603.67	1473.26	1795.27	1685.34	1051.74	1021.06	1207.67	1096.35	1119.53	1163.88	986.827	1011.32	963.556	1548.7	930	996.123	1028.27	769.469	812.877	857.457	1444.9	1606.85	1572.31
Chr1	1467920	1471441	promoter	0.152258	2940.42	1596.75	3791.89	3643.52	3350.94	2403.85	2830.27	3134.14	2528.54	2702.81	2751.89	2362.02	2640.03	2163.01	2174.91	2726.13	2574.64	1840.22	1841.6	1911.04	2884.86	2252.53	2441.18	2149.34	2361.04	2754.07	2296.1	2241.3	1648.7	1204.53	1310.69	1913.08	1715.11	1683.54	1625.71	2327.33	1448.38	1449.57	1410.91	1699.06	1849.85	1753.91	4402.22	4714.27	3483.9
Chr1	1475975	1476515	promoter	0.295805	386.802	248.753	301.296	282.988	332.185	472.765	413.741	393.765	467.494	451.247	380.593	353.895	397.272	328.802	359.815	349.543	399.043	371.938	492.358	423.852	348.154	357.815	356.722	456.809	425.29	391.444	296.451	305.16	192.049	257.531	345.593	223.642	276.642	285.593	249.019	243.074	174.185	244.16	241.16	241.691	330.37	322.679	428.586	478.259	377.062
Chr1	1476750	1480248	promoter	0.16915	1420.64	1065.22	1907.86	2042.51	1492.83	2082.7	2470.64	2287.69	2162.37	2125.88	2243.99	2369.57	2177.23	2292.65	2092.01	2333.38	2317.33	2512.32	2658.57	2864.15	2310.67	1946.04	3074.41	2526.57	2762.27	2855.57	3545.37	3498.15	1890.25	1937.46	2028.35	1527.32	2191.54	2181.25	2188.65	2586.52	2144.27	2022.36	1757	1464.5	1475.59	1545.21	1220.32	1314.29	1227.42
Chr1	1481024	1481396	enhancer	0.298521	171.074	110.765	201.401	206.272	268.012	220.506	178.759	211.296	322.34	251.574	252.488	209.895	228.784	444.173	289.963	138.432	84.9136	246.877	430.574	342.42	104.21	72.2531	306.111	283.167	398.827	301.296	193.167	188.79	80.5679	88.2593	120.963	106.358	52.8148	66.7654	82.7531	84.642	72.1728	104.556	81.4938	43.4815	52.3086	78.8704	127.901	121.704	262.741
Chr1	1482028	1482902	promoter	0.150937	642.901	507.679	692.765	744.846	740.302	819.71	848.815	984.086	937.481	978.309	934.951	817.34	970.568	875.265	839.926	856.444	910.92	1028.31	1126.06	1017.11	823.358	683.358	853.765	993.16	1038.64	999.315	924.142	1158.47	905.759	1094.27	999.543	855.525	720.79	799.765	737.772	1217.74	559.426	711.333	534.796	776.852	701.84	668.37	830.975	802.494	918.815
Chr1	1486708	1487503	promoter	0.236216	281.901	334.951	337.111	413.426	379.488	301.944	294.747	388.259	312.679	339.716	374.469	300.852	335.556	399.222	355.704	307.673	306.272	145.395	277.889	307.148	240.556	207.636	307.321	260.654	246.074	253.525	345.309	399.247	487.309	425.42	452.284	414.099	477.92	525.037	526.778	534.531	374.352	382.037	468.407	358.265	413.235	424.025	517.593	594.16	622.975
Chr1	1490682	1491207	promoter	0.300474	151.883	125.938	157.469	187.142	175.006	166.142	176.975	200.451	223.198	215.037	195.062	156.716	217.364	166.79	117.043	203.025	174.698	145.395	190.957	178.691	176.444	104.16	160.765	130.198	137.833	169.37	174.333	196.401	184.426	148.932	145.352	200.568	174.66	159.481	180.222	309.907	151.821	115.302	193.235	177.852	275.994	149.136	334.926	323.716	280.031
Chr1	1493959	1495150	promoter	0.258911	309.938	241.21	490.296	488.025	520.852	382.185	484.79	439.123	454.636	497.037	561.722	529.716	488.963	612.488	550.278	367.333	412.716	501.012	534.247	664.346	399.395	352.469	557.852	549.92	593.568	507.864	439.728	458.574	408.951	427.259	428.58	493.593	406.012	436.321	487.086	386.272	345.568	432.951	292.765	515.802	539.16	546.043	932.889	791.179	926.191
Chr1	1496352	1498411	enhancer	0.130692	892.543	720.63	1389.32	1499.63	1505.46	1188.14	1146.85	1446.82	1323.83	1240.78	1142.2	1277.19	1045.33	1172.51	1168.8	1358.19	1272.31	1234.94	1041.7	1083.71	1301.09	1019.95	1281.7	1102.24	1030.73	1106.15	1109.4	1166.24	1850.53	1102.91	1089.77	2264.88	1562.37	1626.8	1642.3	1865.78	1183.85	1019.95	1034.36	1850.38	1735.6	1729.57	1647.7	1687.72	1661.54
Chr1	1503452	1505303	promoter	0.167458	1899.32	1872.12	2452.73	2277.93	2593.46	2132.75	2609.13	2553.16	2544.85	2689.22	2542.32	2536.8	2256.62	4023.43	4031.29	3114.67	2911.62	4734.84	4855.19	4918.04	2839.16	2273.38	3402.78	3834.57	4036.48	3492.36	1542.57	1554.43	2120.95	1913.94	2083.97	2298.7	1683.54	1676.96	1743.09	1356.59	1278.77	1696.86	1773.18	1532.67	1520.57	1356.28	3913.64	3940.11	4128.89
Chr1	1510433	1510677	promoter	0.299143	60.1605	64.179	63.6111	74.5494	75.8333	77.3086	75.7778	55.8395	86.2037	53.2346	72.3889	54.0864	76.5556	34.037	20.716	72.963	53.284	49.9753	41.5185	86.5679	90.4938	83.3148	63.6111	48.6173	85.1728	49.4753	75.4198	52.1543	48.6358	52.6914	58.6481	53.6543	58.1235	61.5802	60.4815	82.037	38.7284	43.4938	74.7407	90.6543	52.3086	106.636	77.3827	70.4198	114.414
Chr1	1511451	1512164	promoter	0.286939	273.617	392.451	308.599	334.204	325.667	341.432	382.784	309.778	344.031	362.062	323.642	341.685	337.012	357.815	351.84	449.414	496.969	427.71	601.957	383.117	438.025	383.494	529.926	478.84	425.29	578.679	241.525	250.352	284.827	244.932	257.284	250.148	259	300.457	271.259	382.272	187.432	166.617	131.438	304.716	266.975	297.148	289.444	333.679	315.815
Chr1	1517355	1519127	promoter	0.240784	457.228	236.049	257.444	302.358	197.123	519.994	479.395	440.778	501.463	569.679	474.37	464	433.395	1004.93	1089.1	296.049	306.272	1234.94	1332.41	1308.95	299.198	304.562	799.395	1181.67	968.031	1124.8	640.704	578.914	601.654	516.21	546.63	605.654	459.019	523.123	548.228	350.531	584.593	701.389	500.944	402.432	417.747	349.685	813.883	718.093	1263.62
Chr1	1519715	1520892	promoter	0.210705	466.926	286.346	560.556	565.852	596.79	455.691	443.63	426.235	504.741	517.617	429.728	461.086	341.975	769.586	783.469	653.586	624.895	802.037	868.58	777.383	593.5	522.691	693.395	758.37	697.704	823.265	476.364	522.272	491.315	449.506	444.605	637.111	640.154	688.321	598.914	414.877	412.531	488.531	494.123	435.901	430.747	455.895	1121.8	1093.86	1302.71
Chr1	1523618	1523949	enhancer	0.283655	114.395	162.296	111.741	103.037	96.9383	113.407	132.827	123.852	155.667	167.611	148.093	132.741	117.272	121.031	154.562	204.889	222.284	286.198	268.383	199.401	212.889	111.926	152.426	246.963	258.457	220.327	104.951	143.346	93.7654	92.6481	89.8148	172.914	167.173	156.019	165.13	258.568	74.8519	107.605	68.9877	104.79	146.605	149.136	268.358	343.556	342.222
Chr1	1524549	1525680	enhancer	0.244506	253.198	291.074	387.259	422.074	386.654	435.698	430.278	450.506	445.741	397.691	491.79	468.333	375.42	518.272	461.617	429.185	407.259	523.099	512.716	378.994	455.228	386.383	474.173	433.802	398.827	294.272	418.846	307.074	398.506	325.093	351.741	315.136	354.704	483.617	466.84	504.093	305.815	286.568	228.63	377.568	266.975	282.272	849.679	841.241	943.926
Chr1	1527414	1527744	promoter	0.293754	137.457	149.963	154.34	119.302	88.2284	239.92	262.722	181.019	239.475	249.593	240.093	190.494	159.722	343.309	311.099	154.074	190.469	382.926	329.914	431.463	186.16	97.1235	363.21	411.951	310.068	208.235	64.8889	79.142	119.062	110.877	121.617	44.037	68.5556	71.1358	63.2469	161.37	58.4691	41.6049	49.6852	79.5679	77.9877	55.7901	71.8765	49.321	32.7778
Chr1	1528421	1530051	promoter	0.253685	584.63	372.216	445.512	430.698	449.932	512.778	488.481	488.407	528.617	550.642	570.765	637.327	475.519	831.815	728.821	317.444	384.951	511.901	639.179	598.562	324.086	343.914	513.679	503.784	497.056	446.556	279.198	290.432	339.086	246.852	177.123	255.969	238.494	252.457	282.642	261.395	322.086	277.889	178.253	225.772	229.123	241.056	942.642	927.444	974.235
Chr1	1531096	1531671	enhancer	0.302665	231.074	187.432	180.568	206.272	154.025	293.907	240.123	241.136	248.395	279.63	251.593	238.198	227.5	206.642	258.611	208.728	174.698	145.395	230.852	156.247	206.877	230.827	171.16	163.463	152.981	176.71	136.265	143.346	156.753	176.185	165.025	151.074	149.556	187.926	173.407	289.901	141.117	162.321	235.877	116.228	108.765	138.111	432.519	471.315	472.395
Chr1	1534022	1535610	promoter	0.155594	708.173	605.154	915.321	870.222	739.031	779.407	820.21	836.42	761.179	781.611	795.247	795.216	747.852	794.636	908.16	749.358	785.531	691.241	663.753	774.185	746.247	661.093	754.346	842.235	860.235	834.679	861.438	707.321	649.914	641.741	789.444	702.586	706.951	742.691	660.926	619.784	635.827	689.469	590	574.049	645.222	589.864	2473.28	2323	2486.41
Chr1	1537432	1538411	promoter	0.236506	315.315	207.377	353.623	316.951	282.401	306.938	303.907	270.333	335.994	408.253	330.444	318.469	221.173	651.981	433.778	182.704	129.84	543.272	608.302	618.691	263.136	225.975	619.074	633.08	629.444	456.809	124.667	74.8642	119.407	100.049	61.2346	93.8827	64.7901	69.6605	83.8704	60.3086	101.537	113.605	180.074	72.4568	65.0679	85.4753	1305.37	1122.59	1868.99
Chr1	1544903	1546901	promoter	0.221148	648.16	631.753	1093.06	1029.35	1020.53	886.519	817.247	927.611	811.414	825.222	819.975	972.944	812.469	1227.52	1127.26	1016.97	986.42	1466.22	1567.21	1469.33	940.352	872	1269.44	1317.73	1085.23	1380.17	1064.06	943.796	887.167	993.741	979.037	829.667	1187.58	1174.23	1203.93	572.877	735.037	745.21	518.086	907.284	879.827	837.469	1745.1	1599.67	1974.28
Chr1	1547966	1549360	promoter	0.149818	1287.75	1544.79	1206.42	1055.78	1115.52	1296.15	1050.64	1141.83	1007.56	1122.76	1046.35	1440.79	1281.52	2756	2914.95	782.543	849.185	3696.79	3695.27	3503.36	892.679	966.173	3737.7	3203.62	3064.88	2696.8	501.728	684.778	739.944	940.944	997.759	985.228	519.827	615.333	629.42	1028.58	553.883	624.852	417.901	543.525	525.074	605.21	1184.69	1198.59	1789.15
Chr1	1549925	1550227	enhancer	0.299461	95.5309	123.63	96.2531	83.716	58.5802	114.679	125.716	100.623	108.988	88.3457	91.9136	111.358	135.691	137.037	156.642	93.2963	97.7099	118.185	201.123	350.154	122.377	92.6728	263.296	224.259	242.883	257.599	126.327	159.42	123.012	199.519	171.556	246.228	116.228	112.395	129.389	149.901	91.642	109.21	72.1728	132.198	103.821	124.173	123.074	103.037	87.8148
Chr1	1553212	1553824	promoter	0.28128	149.494	243.84	142.395	183.173	135.827	187.901	212.741	204.21	226.691	261.901	219.358	238.198	247.475	488.698	338.259	185.796	170.84	394.296	621	550.593	169.654	109.185	335.031	388.037	344.198	422.741	179.037	139.599	266.037	245.469	297.031	391.691	242.296	273.617	249.019	135.778	207.111	190.463	156.667	174.617	163.469	138.111	617.463	591.679	787.778
Chr1	1554126	1554829	promoter	0.250433	460.444	633.654	192.747	193.963	192.593	295.049	318.951	303.765	295.568	360.42	272.642	257.728	298.185	794.636	936.031	257.444	240.481	992.981	1150.37	1180.97	195.914	176.858	967.827	1030.23	936.475	746.796	138.309	141.556	232.333	290.21	207.636	196.858	127.79	162.673	125.765	220.037	198.772	251.827	306.179	68.8025	116.247	99.7407	248.148	218.87	233.284
Chr1	1558058	1560775	promoter	0.134262	3365.69	2322.35	2703.8	2571.17	2713.11	2707.59	3346.59	3249.91	3027.4	3120.35	2527.36	2609.13	2313.78	2597.71	3096.45	2515.59	2380.79	2526.57	2770.26	2788.84	2119.85	1889.72	2874.67	2822.45	3269.94	3618.33	2365.23	2309.57	2377.86	2536.8	2210.11	1841.11	2084.84	2033.77	2080.12	1635.98	1791.58	2329.81	2209.91	1379.91	1325.99	1446.07	2348.36	2231.85	2332.28
Chr1	1563881	1564847	promoter	0.0950391	1617.57	1748.35	1679.81	1608.22	1564.78	1544.23	1964.93	1731.3	1852.98	1846.38	1604.6	1564.3	1584.18	1656.56	1526.88	2697.38	2616.51	3202.93	1735.93	2106.75	2828.31	1973.68	1546.96	1677.93	1900.88	1907.52	1732.35	1881.72	2541.2	2239.64	2265.1	2148.73	1911.68	2015.12	1976.04	3066.73	1430.64	1517.35	1778.11	2232.74	2361.8	2068.42	1803.77	1811.04	1667.64
Chr1	1567726	1568398	enhancer	0.284491	194.951	90.3086	166.142	158.099	197.123	181.191	142.957	141.951	201.846	199.593	255.772	209.895	182.938	412.537	372.136	92.6296	79.2407	159.722	313.667	274.136	88.6914	60.2222	249.765	235.864	279.235	208.235	151.37	132.494	144.753	137.037	150.309	154.136	141.407	138.568	160.037	87.2901	112.506	127.691	155.79	101.895	132.049	89.0741	921.889	841.019	820.272
Chr1	1568616	1571042	enhancer	0.0894007	3587.99	3368.04	3350.94	3347.72	2921.2	3156.38	3493.3	3301.8	3225.92	3081.74	2974.31	3071.14	3310.14	1860.7	1921.94	4967.68	4663.43	1936.79	2319.44	2083.32	5585.36	4051.01	3222.13	2608.3	2738.22	3222.13	3592.51	3788.49	3515.07	3757	3863.73	3647.85	3827.79	3769.06	3514.4	6861.6	3062.27	3202.25	2881.48	4198.68	4082.16	3894.7	2233.91	2530.88	2441.49
Chr1	1575145	1575972	enhancer	0.272766	275.877	319.802	353.623	348.463	358.864	192.488	243.586	198	220.914	243.29	255.772	217.827	217.364	784.586	787.63	252.086	186.679	613.296	879.099	814.235	258.333	179.42	803.191	655.84	682.728	500.136	153.037	182.932	220.13	192.71	225.457	193.346	150.42	162.673	130.481	289.901	158.333	187.123	259.383	157.617	141.914	152.512	260.321	232.37	297.321
Chr1	1576312	1577169	promoter	0.14298	797.111	820.407	790.34	749.988	837.691	950.426	1064.67	905.08	1100.43	931.148	911.42	912.722	815.864	934.815	906.84	892.148	881.827	1019.2	1074.65	1041.78	826.395	704.444	526.84	789.827	775.08	830.975	1010.33	1042.57	889.358	860.691	816.426	979.981	724.759	746.951	735.944	925.136	644.037	699.667	1015.99	700.852	751.506	622.37	798.358	798.469	886.167
Chr1	1583332	1584827	promoter	0.108432	2305.88	2291.08	1101.46	1111.05	1194.84	2308.43	1805.62	1960.22	2290.58	2189.41	1912.41	1852.14	2256.62	1194.78	1222.01	1447.35	1411.58	1080.62	1189.19	1362.75	1222.81	1164.47	1262.91	1153	1452.68	1282.61	2226.2	2027.29	1531.8	1533.84	1563.8	1714	1022.85	1012.5	1001.77	2398.88	1731.6	1856.53	2003.23	1154.11	955.864	1020.17	877.802	850.049	886.167
Chr1	1587460	1588628	promoter	0.130225	461.556	451.753	689.179	732.006	699.691	582.364	591.679	603.691	561.012	578.883	629.506	564.593	531.864	385.741	528.556	782.543	599.383	673.414	423.444	466.148	723.012	603.136	499.691	508.407	380.383	614.883	1909.68	2304.73	1868.09	1318.48	1338.56	2311.95	2070.21	2074.09	1991.23	2088.1	1429.91	1330.43	1194.78	2430.11	2268.12	2325.81	1440.41	1395.68	1263.62
Chr1	1593633	1594188	enhancer	0.305085	262.759	221.728	231.605	169.358	231.284	221.852	253.654	243.519	313.123	281.432	313.444	292.037	281.691	246.642	357.815	221.981	215.716	298.704	346.247	290.914	218.346	140.056	196.66	270.093	269.889	345.71	220.84	186.852	155.611	217.84	264.117	248.241	189.975	180.37	188.265	250.79	166.716	226.667	161.407	147.074	167.759	173	282.16	297.759	280.031
Chr1	1595512	1596416	promoter	0.162269	559.284	786.975	664.346	725.969	599.346	731.179	807.012	729.852	684.815	746.735	637.451	682.877	498.802	437.63	471.383	940.79	967.593	394.296	385.975	405.333	888.481	626.142	745.056	506.846	547.617	798.16	749.062	820.512	907.086	821.37	847.247	866.765	752.753	835.907	791.179	749.728	656.395	593.741	814.772	694.827	841.284	661.741	750.296	810.173	639.099
Chr1	1597684	1598332	promoter	0.24276	257.574	315.352	267.691	293.191	382.753	270.753	278.864	294.062	261.679	310.512	306.79	301.914	182.938	506.37	533.66	531.79	471.901	802.037	534.247	602	543.556	402.753	500.691	552.815	505.284	496.556	268.111	305.16	403.117	343.858	366.432	429.444	425.79	414.673	462.247	353.235	248.284	188.981	204.031	433.457	456.407	341.136	652.284	565.451	574.049
Chr1	1598599	1600141	promoter	0.243704	454.778	412.519	563.852	573.852	553.84	355.296	381.29	392.63	301.198	331.981	419.531	387.21	311.951	710.105	711.469	472.494	357.963	602.259	547.438	589.79	387.253	386.383	710.506	604.852	582.148	507.864	346.111	367.247	408.358	411.901	400.858	336.815	463.031	463.877	382	401.926	398.463	308.259	308.284	361.321	376.728	390.765	1193	1108.28	1257.08
Chr1	1604705	1606282	promoter	0.23852	460.963	521.741	712.21	650.457	637.111	534.13	466.136	546.852	482.062	558.333	537.247	557.481	463.667	618.864	641.574	603.611	574.247	523.099	534.247	492.827	505.79	429.506	488.809	502.889	385.765	563.481	560.346	429.963	586.333	512.519	380.58	533.099	491.29	507.623	574.735	599.901	581.086	558.222	539.963	385.877	387.315	414.432	1104.27	1128.77	1202.42
Chr1	1606786	1607138	enhancer	0.304729	192.383	82.3086	139.117	137.833	169.012	148.333	111.519	146.346	173.222	176.802	137.025	166.025	146.247	166.79	266.802	108.025	101.265	159.722	201.123	102.679	78.1914	32.0494	140.568	125.136	162.778	161.667	94.4815	126.469	153.58	143.333	147.025	140.704	144.852	98.7654	148.309	114.543	80.0988	150.086	120.71	116.228	129.438	113.525	240.642	252.636	262.741
Chr1	1607442	1608521	enhancer	0.28531	420.654	356.975	487.259	460.846	473.698	458.284	371.025	459.198	385	381.37	395.735	447.809	349.086	350.679	447.926	377.346	382.92	311.772	250.025	299.037	293.877	273.37	326.407	270.093	230.901	319.099	471.969	461.728	571.247	507.506	489.716	428.235	479.852	430.883	466.148	474.333	633.611	588.833	515.932	592.185	569.611	582.617	648.691	653.383	472.395
Chr1	1611472	1612130	promoter	0.2649	253.198	253.506	142.395	220.105	271.667	153.309	170.136	226.21	271.71	217.519	252.488	249.383	214.08	406.185	480.358	264.296	284.086	145.395	190.957	130.37	167.29	111.926	150.309	184.148	181.586	227.704	170.086	203.815	267.71	273.889	329.284	252.667	181.623	213.525	239.593	300.265	155.556	323.358	315.759	208.969	232.926	192.296	428.586	403.593	505.852
Chr1	1612373	1613269	enhancer	0.188089	304.556	202.037	207.148	160.901	282.401	260.963	161.809	262.58	271.71	273.074	229.907	285.525	300.506	590.099	415.654	173.352	192.667	246.877	180.043	146.049	103.63	51.5	196.66	178.481	149.463	192.593	202.037	250.352	201.938	253.16	310.006	152.778	147.963	112.395	128.123	100.852	146.049	260.321	184.716	68.8025	137.216	166.012	1584.8	1506.67	2255.91
Chr1	1615162	1615376	enhancer	0.304693	200.321	165.037	72.7037	83.716	94	157.29	80.3333	108.494	174.457	139.556	127.043	184.642	182.938	284.963	175.099	105.969	90.3889	118.185	83.1728	81.1111	69.8642	57.8272	103.512	92.6481	55.4198	116.074	29.679	46.0617	103.346	146.901	118.346	31.1975	44.7654	48.6173	49.8457	33.5062	58.4691	71.6543	87.2716	47.4383	14.6543	10.2963	21.4136	19.6481	32.7778
Chr1	1617033	1617600	enhancer	0.295375	349.272	293.938	257.444	206.272	330.383	234.63	179.796	252.259	289.173	286.309	255.772	267.154	315.889	641.099	490.012	255.772	310.611	311.772	436.938	245.123	213.346	215.679	242.802	271.975	242.883	315.352	134.735	213.796	213.914	280.728	235.815	205.401	212.772	247.012	236.969	106.593	171.667	249.994	330.543	120.395	124.074	183.198	363.92	352.858	315.815
Chr1	1617860	1618853	enhancer	0.193651	409.383	369.815	455.901	443.222	328.074	383.302	324.562	370.667	363.852	363.247	279.827	342.691	327.556	595.401	596.185	821.951	827.16	812.753	688.704	563.667	747.809	600.506	737.444	670.506	481.457	453.358	311.79	307.074	307.099	368.272	297.352	409.012	552.123	571.265	493.611	453.16	268.494	282.975	240.586	407.21	449.228	469.025	1014.95	1014.33	1101.1
Chr1	1623154	1625335	promoter	0.154829	757.123	685.123	1185.64	988.815	952.062	829.531	844.58	901.846	712.259	772.778	887.907	912.722	797.006	779.84	641.574	806.704	750.142	700.593	561.099	730.938	665.173	630.654	971.426	775.327	813.963	1032.01	825.988	577.272	804.259	733.37	708.679	612	630.679	584.685	660.037	595.691	756.975	873.198	679.519	592.185	653.012	689.975	4682.75	4957.22	5254.85
Chr1	1635509	1636474	promoter	0.226973	504.741	478.809	350.457	423.932	487.438	452.111	425.562	528.568	431.037	498.543	490.383	444.84	546.148	601.012	540.025	393.481	407.259	653.938	627.512	709.173	401.198	360.235	679.821	653.29	642.901	604.154	333.815	277.679	428.179	376.333	451.309	279.37	308.198	265.272	305.469	328.877	317.432	387.296	239.938	177.852	217.315	220.395	711.852	639.42	827.519
Chr1	1637648	1637945	promoter	0.288673	118.901	85.0247	81.5185	140.179	74.1975	103.593	120.543	108.494	99.3951	129.451	112.346	117.346	132.889	74.679	82.3333	166.901	133.309	76.1235	211.105	135.753	193.63	142.704	123.864	127.759	199.383	144.944	81.679	94.4321	100.012	93.2346	99.8148	101.117	123.691	132.012	118.975	130.265	58.9383	64.5062	133.87	94.5309	80.6235	89.0741	274.759	257.63	214.432
Chr1	1638685	1639557	promoter	0.223273	239.136	182.84	195.623	217.228	201.531	257.469	205.636	239.136	265.852	227.914	268.358	267.154	237.198	406.185	281.494	217.92	174.698	189.556	240.481	264.346	140.364	174.216	191.42	197.623	234.086	235.586	249.383	217.87	181.704	187.827	180.988	272.994	155	127.833	151.525	149.901	185.062	238.877	112.802	188.296	262.741	255.383	1216.6	1248.6	1427.86
Chr1	1642700	1643382	promoter	0.261683	97.2099	138.84	122.506	93.0123	109.623	126.765	131.901	117.827	172.519	118.673	152.34	161.278	155.901	182.247	184.123	121.117	151.827	189.556	169.154	204.494	133.395	129.432	155.346	144.432	159.494	180.71	268.111	323.259	330.877	182.426	191.642	302.432	313.037	297.531	285.815	328.877	255.309	266.926	236.679	494.296	492.457	513.21	1031.23	1026.64	1249.7
Chr1	1644146	1646076	promoter	0.179955	696.049	720.63	1058.53	881.259	648.198	686.006	710.778	774.975	651.494	748.068	692.858	742.506	627.914	646.506	662.488	862.747	972.772	532.988	561.099	550.593	858.494	753.185	658.556	591.728	679.691	667.883	916.142	886.593	953.636	792.198	785.457	1050.64	1174.36	1135.69	1122.76	933.679	806.247	847.901	743.136	1013.59	998.951	897.877	1174.06	1097.28	1470.32
Chr1	1646967	1648197	promoter	0.171138	1030.91	1070.3	653.481	577.642	699.691	690.864	719.457	614.963	693.988	679.988	695.148	742.506	637.765	624.395	695.296	888.383	967.593	974.901	1121.04	963.599	897.753	1000.31	1448.86	1123.52	1133.22	981.611	582.753	611.852	859.858	762.691	841.679	1055.8	818.488	775.765	758.086	783.117	648.136	704.444	681.994	594.901	555.037	668.37	417.691	404.012	455.037
Chr1	1659173	1663726	enhancer	0.138431	4460.5	4276.36	4207.57	4107.49	4026.16	4506.36	4113.89	4030.25	3958.14	3860.57	4495.28	4777.84	4670.44	4773.53	4886.7	5258.6	5717	6111.02	6111.02	5817.14	5091.83	5050.72	6638.1	6487.89	6827	6329.48	2852.11	2903.5	3859.67	4458.8	4831.1	2678.35	3141.43	3242.75	2964.85	3882.28	3240.15	2731.72	2688.52	2048.54	1988.41	2129.78	3176.3	3145.34	2918.64
Chr1	1669053	1669694	promoter	0.299254	171.074	157.241	101.006	135.642	180.556	221.852	182.506	189.247	227.222	232.37	219.358	191.358	214.08	313.444	229.728	135.593	167.111	298.704	258.969	209.753	129.173	176.858	298.21	259.457	279.235	297.753	168.136	121.037	143.568	149.722	192.049	185.543	162.537	164.062	186.444	198	159.667	253.358	256.716	124.481	94.1111	103.333	282.16	239.679	280.031
Chr1	1671242	1672228	promoter	0.253572	387.593	435.759	463.586	475.994	453.704	442.506	395.525	405.642	311.395	339.099	335.062	346.111	393.173	222.79	328.488	601.957	589.457	349.333	370.42	452.309	591.21	562.914	424.136	386.198	441.759	353.321	311.79	279.765	371.469	399.222	455.889	439.926	372.716	363.185	356.222	347.772	348.321	358.111	261.037	460.63	360.815	414.432	359.667	437.71	548.438
Chr1	1678649	1679225	promoter	0.285517	216.827	224.043	297.611	254.222	312.358	239.92	286.833	285.975	277.679	288.019	342.765	268.037	240.778	214.963	294.111	248.741	188.488	311.772	423.444	311.864	272.901	159.648	312.247	312.79	269.889	404.457	162.765	135.914	191.173	195.247	214.284	256.889	201.938	245.278	219.864	184.519	179.901	135.352	167.395	150.444	198.438	109.753	424.815	419.833	455.037
Chr1	1681505	1682668	promoter	0.21709	374.259	367.679	546.062	561.031	525.716	389.278	427.951	452.222	423.852	402.222	560.654	412.574	449.296	584.63	613.21	405.012	429.901	532.988	688.704	531.383	431.667	378.191	558.741	519.327	611.333	563.481	506.056	385.741	487.543	456.679	594.037	501.759	494.988	485.593	482.025	563.685	427.506	549.685	524.574	513.494	545.623	519.531	652.284	664.333	834.932
Chr1	1689695	1690370	promoter	0.275917	272.642	323.815	250.932	240.321	286.006	235.79	198.741	213.914	269.222	243.29	255.772	241.117	299.377	424.802	396.278	256.525	278.519	394.296	211.105	326.13	151.321	166.012	381.228	355.105	310.068	349.71	150.407	167.111	223.617	249.765	215.901	220.037	204.383	228.716	228.914	147.086	128.537	216.568	207.296	120.395	139.716	120.605	440.031	417.827	342.222
Chr1	1692173	1692629	promoter	0.29773	190.204	131.148	210.21	150.247	175.006	199.37	309.716	229.821	211.525	251.574	259.87	217.827	171.42	246.642	285.926	162.877	118.358	260.167	354.66	367.259	233.173	148.296	568.043	412.79	398.827	253.525	98.1235	88.6296	169.086	124.673	141.21	166.309	159.926	174.914	166.981	106.593	89.5309	83.463	147.302	98.4568	62.3704	55.7901	137.519	117.315	151.228
Chr1	1693076	1694043	enhancer	0.21563	555.469	515.531	626.346	546.667	579.531	548.438	585.802	585.642	520.698	613.136	597.506	530.37	520.58	813.926	929.617	656.444	690.488	1210.47	1106.39	1086.09	677.358	750.444	1143.14	1167.82	1139.17	1132	181.623	213.796	327.704	359.654	188.537	263.099	276.642	261.728	234.21	302.907	230.407	249.994	305.512	222.358	129.438	179.728	308.932	286.679	288.043
Chr1	1696888	1697943	enhancer	0.28107	172.63	209.605	319.259	344.08	357.148	275.074	272.963	254.222	255.383	264.012	280.975	217.031	226.074	343.309	368.216	198.926	147.914	189.556	337.92	466.148	249.642	233.216	477.42	349.105	398.827	268.975	209.667	184.846	117.006	118.556	109.21	138.605	110.444	104.568	106.426	144.247	144.302	127.691	125.191	154.043	108.765	155.877	798.358	862.42	902.352
Chr1	1700760	1701491	promoter	0.21993	361.988	478.809	387.259	429.056	380.469	461.086	487.438	389.296	388.809	393.889	303.926	381.481	323.938	476.025	441.265	707.506	646.358	709.284	553.846	657.333	678.728	502.154	590.111	577.012	653.346	571.173	418.846	385.741	512.778	450.568	469.111	627.623	509.562	522.006	558.623	471.568	540.926	413.815	373.543	541.494	491.056	552.895	517.593	549.957	522.494
Chr1	1702464	1703161	promoter	0.268484	204.401	288.457	216.772	212.741	147.457	205.864	284.321	218.432	214.481	222.358	188.309	192.117	204.938	238.704	175.099	508.802	473.698	204.333	346.247	390.784	588.222	522.691	407.611	390.383	324.136	370.123	387.031	451.759	509.802	499.519	493.809	498.148	613.741	523.123	507.951	664.358	494.642	334.765	397.284	428.556	543.58	546.043	185.815	204.049	204.056
Chr1	1704488	1705524	promoter	0.151037	701.265	624.309	353.623	454.136	423.037	494.074	481.667	485.481	425.79	456.753	514.815	501.284	485.802	606.364	624.969	823.79	794.84	682.111	730.556	817.247	893.765	770.79	874.759	834.019	800.772	675.16	720.728	736.296	931.049	723.481	604.296	1123.28	1217.66	1209.02	1177.98	1209.78	790.889	741.938	935.593	1202.16	914.117	945.037	861.951	797.198	622.975
Chr1	1706727	1707217	promoter	0.294317	233.457	217.13	114.519	142.981	201.531	203.438	199.469	204.71	223.586	196.654	158.716	168.617	185.519	284.963	242.802	368.154	326.951	246.877	313.667	334.58	403.809	310.494	379.167	292.099	301.123	334.593	212.975	250.352	307.358	265.951	291.395	502.796	344.302	380.784	351.63	270.784	256.642	286.568	251.877	350.673	380.222	416.84	409.784	463.235	358.42
Chr1	1709125	1709793	promoter	0.272901	201.111	279.37	177.728	168.049	164.383	287.309	435.086	356.722	355.204	354.321	328.185	419.673	418.198	699.154	566.432	456.179	499.352	1333.85	1400.69	1327.06	464.204	455.784	931.414	1146.65	711.173	523.012	161.827	171.173	239.864	301.012	294.099	164.043	228.321	190.42	192.543	319.062	138.444	169.154	317.296	208.969	194.012	183.198	157.241	143.346	114.414
Chr1	1712968	1716222	enhancer	0.113388	3495.99	3021.4	4353.65	4296.06	4297.33	2559.66	3479.54	3511.33	3292.07	3272.72	3402.07	2945.25	3065.32	2781.93	3459.01	4512.21	4267.6	3253.47	3515.74	3315.33	4458.8	3463.05	4059.27	3843.35	3638.99	4212.54	2270.07	2619.52	3197.49	3059.02	2913.31	3485.47	2757.35	2930.51	2943.81	3838.57	2362.28	2410.8	2561.99	2784.16	2711.17	2750.67	4010.8	4342.6	4207.57
Chr1	1718562	1719197	promoter	0.288938	366.086	486.79	383.673	336.222	382.753	507.543	481.667	408.765	519.494	446.037	407.636	390.062	502.37	166.79	256.574	490.222	462.617	337.469	180.043	274.136	542.111	318.037	361.309	313.778	365.117	356.877	426.222	421.056	341.951	366.796	373.432	461.16	333.988	400.549	342.426	479.988	280.444	336.488	317.883	273.247	393.827	364.981	379.753	400.21	288.043
Chr1	1721064	1721758	promoter	0.295801	233.457	315.352	264.062	305.34	219.667	403.605	380.414	356.222	420.34	362.062	314.568	349.105	289.309	190.327	252.679	386.79	374.84	361.216	354.66	321.321	364.457	312.79	278.667	287.364	362.722	279.926	493.272	399.247	251.877	276.099	237.901	344.111	325.84	384.679	356.679	323.963	279.605	251.827	206.111	460.63	403.914	426.284	353.037	379.79	422.34
Chr1	1725810	1726481	promoter	0.297611	131.074	105.519	145.346	134.259	125.593	178.519	170.827	176.395	181.086	188.296	173.012	162.025	198.117	129.056	196.716	139.543	101.265	118.185	258.969	146.049	133.395	153.722	181.228	172.852	156.21	204.272	218.049	275.679	238.58	179.148	260.457	157.858	195.481	186.556	195.556	227.988	185.432	178.432	173.944	157.617	180.642	197.623	232.037	224.414	262.741
Chr1	1729146	1730378	promoter	0.264803	640.907	544.858	540.025	522.691	523.321	478.63	623.543	636.265	693.988	601.123	598.562	545.21	690.864	688.704	780.346	581.259	546.284	765.852	830.951	774.185	497.833	476.802	867.444	868.735	923.426	893.136	467.765	526.432	266.975	319.451	384.617	379.84	377.494	426	395.685	508.593	286.457	417.549	203.272	391.951	326.864	279.617	734.901	641.506	607.5
Chr1	1732224	1732935	promoter	0.258692	169.877	212.031	238.111	189.827	269.21	223.259	227.5	216.975	215.901	197.389	149.031	166.858	166.012	263.16	186.346	174.068	133.309	361.216	169.154	346.049	156	166.012	371.42	292.099	301.123	311.704	188.265	171.173	197.364	189.142	130.735	218.568	196.222	210.272	191.778	220.037	138.981	167.938	268.358	120.395	161.278	89.0741	757.722	661.914	787.778
Chr1	1739094	1740047	enhancer	0.264131	260.519	189.889	280.944	336.222	385.21	408.58	639.389	517.16	757.722	644.679	453.821	500.259	475.519	578.704	619.926	279.086	242.296	602.259	775.975	647.222	296.222	233.216	466.994	690.741	539.765	675.16	441.481	663.148	162.519	200.16	172.309	197.914	261.358	238.37	245.42	149.901	131.852	133.827	112.802	184.698	239.926	241.056	328.074	328.457	350.272
Chr1	1740907	1741272	promoter	0.304049	172.012	180.302	177.728	144.512	147.457	265.963	462.741	356.222	418.642	362.062	299.062	294.821	256.284	306.111	433.778	163.457	131.451	543.272	541.531	456	179.895	137.284	259.481	400.506	396.086	334.593	101.716	130.5	111.21	100.049	114.13	85.2963	54.5247	61.5802	54.7284	45.3333	84.2716	62.6914	170.728	54.3765	62.3704	48.4568	87.6914	99.4198	114.414
Chr1	1742770	1746339	promoter	0.215144	3485.47	2956.78	3413.88	3378.14	3380.69	4201.72	4499.44	4289	4506.36	4360.9	3917.65	4079.86	3968.33	4085.47	4840.75	3905.64	3649.75	5237.28	5050.72	4732.81	3642.67	3129.23	4663.43	5008.43	5577.65	5538.13	3500.1	3277.47	3206.95	2933.49	2683.4	3122.3	3147.28	3151.11	3026.02	3529.58	2512.84	3106.35	2994.57	2967.64	2959.93	2594.1	2938.93	3047.38	2781.52
Chr1	1748050	1748645	promoter	0.303125	194.951	202.037	291.272	329.593	260.938	342.932	311.136	335.031	346.105	319.099	250.481	297.914	326.185	299.062	270.284	356.154	365.333	311.772	201.123	299.037	372.259	276	268.167	270.093	279.235	235.586	358.13	360.951	225.636	242.068	363.123	251.549	348.056	353.667	335.16	353.235	156.074	158.062	162.772	313.481	272.142	414.432	240.642	189.827	193.679
Chr1	1753628	1754548	promoter	0.274323	303.543	327.988	260.549	308.321	311.222	344.309	335.031	320.043	342.617	340.562	324.821	351.16	346.827	214.963	357.815	354.136	312.605	491.247	268.383	416.204	326.469	213.154	474.173	361.648	468.728	377.346	305.704	279.765	380.037	411.407	425.29	355.253	324.16	311.469	323	406.642	270.988	311.37	369.309	325.37	245.735	297.148	517.593	479.154	463.586
Chr1	1761647	1762548	promoter	0.258114	210.13	231.074	333.321	400.438	286.006	317.21	307.975	301.741	258.358	255.204	214.895	249.383	219.975	166.79	207.84	343.383	355.864	260.167	250.025	245.123	400.506	323.852	414.494	294.148	263.716	239.37	319.395	321.562	384.414	240.957	381.716	230.753	331.5	354.574	345.105	604.395	329.469	306.765	326.938	462.994	417.747	414.432	334.926	311.284	280.031
Chr1	1766018	1767338	promoter	0.225827	671.346	418.543	899.272	898.019	568.877	902.728	768.951	848.864	902.79	789.753	731.79	754.975	732.512	450.111	588.71	734.593	661.321	427.71	683.272	547	656.858	530.321	733.827	535.654	613.63	544.37	1130.67	974.383	676.062	495.519	549.21	456.475	416.667	443.957	414.432	892.765	679.432	912.309	506.691	741.519	844.531	787.333	729.988	730.173	648.556
Chr1	1768389	1769299	promoter	0.207451	1639.46	1784.42	1404.81	1430.78	1386.09	2354.74	2162.37	1848.21	2481.83	2267.31	1719.1	1552.91	2099.1	906.346	1278.22	3128.62	2597.1	1678.83	1302.93	1508.69	3263.77	2448.2	1606.6	1657.56	1579.81	1804.6	2105.11	2017.74	1721.43	1568.06	1564.78	1918.83	1607.61	1839.88	1625.16	4227.68	1246.69	1292.08	1387.6	2280.81	2239.12	2096.33	2114.31	2312.23	1795.74
Chr1	1773085	1775380	promoter	0.201688	2023.87	1526.7	2786.37	3157.48	2985.5	2136.48	1956.19	2186.77	1960.05	2131.02	2140.77	2204.3	1935.36	2314.52	2373.43	2634.19	2796.96	2826.45	2644.27	2710.42	2647.63	2375.49	2985.5	2839.16	2964.09	2555.68	1280.8	1478.02	3247.47	2466.89	2750.06	2992.67	2350.08	2566.02	2456.43	2843.19	1812.6	2070.04	2027.29	1931.01	1988.41	1613.25	2131.22	2285.38	2265.83
Chr1	1778609	1779817	promoter	0.226958	367.704	255.827	395.383	425.889	425.753	459.648	450.506	448.87	422.549	497.037	466.815	477.08	479.667	794.636	669.593	265.457	250.444	822.988	986.352	1006.72	225.42	215.679	827.58	982.062	885.63	977.58	310.642	290.432	265.605	279.809	344.765	302.025	211.333	197.988	209.167	209.494	269.815	288.519	222.944	157.617	198.438	127.704	885.148	795.154	812.235
Chr1	1786175	1786941	promoter	0.297113	231.895	169.901	333.321	298.37	249.852	209.278	239.481	207.864	231.741	206.778	213.568	209.895	243.136	254.877	266.802	208.728	234.765	325.012	124.123	209.753	168.08	184.642	188.932	237.049	269.889	380.728	232.543	211.648	313.969	260.938	372.136	317.914	265.568	290.037	277.463	258.568	226.617	288.519	342.025	301.519	328.556	269.253	240.642	263.074	271.975
Chr1	1789752	1790489	promoter	0.255731	381.889	212.031	277.932	319.963	355.735	359.117	353.019	327.16	452.617	367.457	395.735	391.877	368.154	612.488	576.623	220.494	252.679	643.407	669.784	612.988	223.259	171.383	501.926	544	574.198	537.586	253.543	277.679	388.111	397.031	421.92	406.346	235.568	273.617	252.056	343.457	241.827	281.16	339.29	358.265	333.58	214	549.747	479.154	599.654
Chr1	1798673	1799310	promoter	0.298287	163.019	149.963	287.988	210.284	207.679	146.049	242.988	205.296	206.593	221.691	210.401	216.099	207.568	277.815	192.728	327.907	298.16	298.704	190.957	189.247	354.58	213.154	209.506	285.302	192.512	188.704	193.167	172.642	230.469	172.772	172.309	249.395	309.247	305.401	269.642	141.556	97	110.753	109.741	205.84	236.679	241.056	320.494	360.037	422.34
Chr1	1803528	1804497	promoter	0.173512	359.222	341.407	715.519	668.235	623.722	564.864	673.086	579.642	579.753	606.889	508.926	445.864	490.136	424.802	599.673	1145.14	1089.04	922.469	547.438	587.216	1200.42	885.383	424.136	596.519	561.827	585.975	499.006	544.531	574.019	501.111	446.438	540.148	832.494	908.938	871.852	1062.94	305.049	385.309	317.883	806.827	862.272	882.21	609.778	675.235	746.099
Chr1	1807306	1808278	promoter	0.142238	676.494	645.42	573.944	655.704	529.123	756.716	904.883	894.16	798.315	848.543	819.975	804.667	773.259	720.543	855.654	826.228	821.852	1044.22	1068.92	1246.93	772.093	661.093	938.907	1114.2	1083.12	935.543	575.568	672.815	829.432	832.716	660.37	752.642	629.457	641.938	656.235	776.481	491.358	454.58	430.006	571.556	532.988	555.494	1206.42	1156.77	1019.99
Chr1	1815203	1816198	promoter	0.133859	780.383	766.358	909.37	1030.49	716.556	1019.15	1101.6	1037.33	1117.35	1144.19	974.068	984.086	997.012	779.84	1031.48	1099.15	1074.81	1010.16	1047.1	995.302	1302.1	1022.32	1085.94	1133.32	1104.8	1102.61	838.679	946.086	897.469	794.568	914.568	957.025	907.185	1020.77	958.173	966.926	534.951	687.716	467.117	1081.05	1052.07	974.099	877.802	854.58	967.086
Chr1	1817099	1817713	promoter	0.26645	597.852	464.63	333.321	366.21	325.667	767.111	526.735	607.198	764.877	784.975	635.654	575.531	754.062	399.222	340.562	333.926	312.605	273.617	492.358	427.543	386.247	246.92	375.963	383.469	474.099	439.543	784.531	705.846	434.852	391.327	439.037	520.383	409.951	424	418.08	1431.3	391.296	558.222	570.58	676.395	637.216	729.451	338.716	354.235	367.617
Chr1	1819824	1820842	enhancer	0.168169	1100.75	909.481	1119.56	960.123	862.42	924.037	914.525	954.16	1027.22	986.778	1039.63	859.889	1061.35	1094.49	1352.34	856.444	862.228	1218.7	1395.6	1367.92	893.259	817.963	1369.88	1316.12	1279	1313.49	871.914	957.086	924.296	818.074	656.321	1339.93	755.654	823.679	800.852	1213.43	766.722	689.469	571.395	1025.62	911.84	1087.9	874.222	865.864	926.191
Chr1	1821359	1822899	promoter	0.113585	2359.62	1516.64	1974.55	2275.91	2030.92	2303.47	2126.06	2153.67	2515.04	2365.23	2214.55	1945.02	2230.61	1311.69	1656.4	1959.51	1819.74	1349.49	1423.42	1364.99	2049.95	1695.33	1765.18	1494.06	1779.38	1705.44	1548.04	1618.52	1559.48	1208.18	1491.67	1586.11	1347	1420.1	1364.89	2118.05	1344.74	1618.28	1337.67	1863.01	1672.77	1628.53	1035.54	1097.62	1040.6
Chr1	1828264	1828667	enhancer	0.304889	244.062	308.444	96.2531	104.457	147.457	187.901	66.7901	119.228	107.278	131.099	89.358	80.0494	120.123	137.037	98.7963	99.679	59.1975	103.821	124.123	108.173	85.642	81	184.346	163.463	131.537	81.037	109.673	84.7037	178.481	157.346	282.272	146.235	155	143.778	123.852	469.395	224.667	314.568	209.086	184.698	137.216	127.704	165.914	193.469	173.278
Chr1	1829441	1830879	promoter	0.201913	2015.79	2190.63	1658.14	1760.44	1845.96	1734.75	1327.75	1509.61	1419.2	1527.11	1493.06	1625.81	1388.68	1982.44	1921.94	1710.21	1566.63	1857.25	1754.41	1812.31	1750.75	1247.05	2979.6	2240.81	2462.49	1801.04	923.296	1062.84	1913.94	1650.63	1502.73	1945.44	1512.46	1681.25	1523.63	3192.22	1470.47	1935.67	1528.58	1520.44	1173.73	1193.77	3515.07	3700.48	3245.8
Chr1	1832483	1832966	promoter	0.288943	387.593	138.84	116.901	177.556	226.481	252.278	183.302	196.895	427.173	323.852	232.284	223.056	275.617	336.056	370.111	141.148	97.7099	481.006	393.469	316.475	102.142	95.0864	259.481	353.469	420.08	614.883	188.265	252.21	121.265	136.049	157.185	196.858	155	168.42	159.21	125.037	174.185	451.327	194.815	112.173	146.605	103.333	312.747	253.852	333.753
Chr1	1837364	1839075	promoter	0.212215	2160.02	2046.9	2374.11	2564.72	2353.67	2345.34	2119.6	2150.06	2457.02	2347.73	2066.48	2196.52	2133.72	2033.77	2306.69	3346.59	3463.05	2698.64	2425.84	2563.23	3534.04	2931.43	2808.37	2758.44	3107.85	2794.23	1824.19	2144.09	2691.58	2376.28	2498.43	2430.11	2205.93	2444.21	2487.59	3632.3	1632.68	2332.47	2181.25	1949.78	1941.56	1903.98	2469.35	2656.09	2504.46
Chr1	1840990	1841460	enhancer	0.303936	61.321	30.4568	35.179	53.7716	67.6173	73.2222	63.9753	73.5432	72.0802	88.3457	72.3889	119.062	63.1111	66.8889	94.3333	54.2469	55.4012	49.9753	201.123	102.679	54.6852	55.5679	66.7284	78.9012	58.5494	120.488	146.716	203.815	240.043	224.926	188.537	204.253	300.753	411.377	343.272	250.79	177.259	224.877	161.407	199.185	219.617	197.623	165.914	115.531	101.21
Chr1	1843168	1843539	promoter	0.29304	29.5926	58.5802	46.5309	55.8642	49.2222	76.0494	61.537	73.8519	75.4691	67.7407	60.321	65.8272	56.4198	106.148	85.1111	55.321	45.6667	12.321	52.5926	81.1111	79.5679	90.2593	35.9012	62.9815	45.4136	54.1605	80.8642	94.4321	75.8272	51.9259	46.2099	68.8889	136.537	176.84	184.975	66.1358	65.9753	85.2716	75.3642	104.79	126.84	71.4198	61.2346	45.4938	47.8025
Chr1	1844982	1845695	enhancer	0.207461	48.0247	52.6111	57.6049	54.8519	54.0864	81.0864	72.2963	87.0679	72.0802	80.5185	79.2346	86.6543	66.9568	34.037	51.3765	64.9383	72.2469	132.025	147.123	167.568	50.9383	62.9259	77.6235	69.321	85.1728	111.5	95.4568	119.062	89.0679	65.0494	15.1728	72.9753	70.6728	75.2469	82.7531	72.0185	84.2716	118.321	84.3025	124.481	94.1111	85.4753	1414.91	1374.19	1470.32
Chr1	1850410	1850871	enhancer	0.303441	30.8395	19.4815	46.5309	26.2407	76.8148	44.821	66.0988	45.0494	75.9753	81.784	46.2099	54.784	59.3519	113.815	77.3827	61.2531	27.9877	49.9753	93.1728	92.1358	43.6358	62.9259	66.7284	65.4938	74.6296	58.9259	69.5432	44.2346	23.4938	24.0741	21.4136	30.4568	18.4568	31.4444	52.9074	48.1358	31.2469	49.5556	12.0617	57.9938	27.5309	59.7284	390.975	433.778	674.154
Chr1	1854694	1856135	promoter	0.183371	890.914	1110.02	1065.22	1102.35	1013.92	902.728	1211.95	1065.22	924.87	988.185	899.58	817.34	883.877	1147.3	1183.28	929.889	1040.69	1257.34	1637.18	1447.99	1026.23	966.173	1608.67	1560.28	1541.65	1568.79	374.981	531.543	796.556	861.469	1004.78	626.216	602.877	683.296	650.901	1321.68	507.074	713.278	606.494	423.481	400.549	346.827	456.247	408.154	325.037
Chr1	1860420	1862366	promoter	0.141696	1875.14	1246.34	1575.22	1502.99	1752.12	1476.16	1959.51	1839.58	1974.55	1980.23	1713.85	1392.06	1598.4	2008.59	2096.63	1815.49	1899.32	2265.83	2370.91	2449.58	2088.3	1725.22	2586.52	2587.82	2928.23	3024.82	907.031	1090.6	1105.01	1273.01	1535.67	973.346	1150.32	1065.87	1137.02	949.16	793.315	901.938	816.16	802.975	732.198	831.494	798.358	855	730.654
Chr1	1864388	1864881	promoter	0.292415	141.852	180.302	201.401	192.667	187.099	205.864	286.556	220.025	231.204	264.667	277.228	189.574	273.191	174.401	338.259	164.889	139.525	553.574	588.654	653.556	176.444	162.877	447.809	551.364	474.099	481.457	140.21	188.79	168.049	220.691	235.543	153.148	118.16	130.735	142.21	261.395	86.2037	112.21	79.1111	104.79	165.543	141.889	153.012	166.062	233.284
Chr1	1868549	1869275	enhancer	0.270585	298.235	277.16	287.988	357.877	342.148	318.414	338.914	318.469	294.525	275.284	347.747	307.358	379.296	238.704	205.537	417.92	363.679	204.333	401.222	295.031	359.815	336.426	278.667	278.759	288.975	290.759	313.099	327.074	355.802	355.827	187.475	345.802	287.735	324.395	336.877	479.988	254.747	325.253	219	342.432	319.043	214	345.827	350.272	315.815
Chr1	1873405	1874944	promoter	0.201175	569.951	544.858	790.34	761.179	759.605	848.716	735.321	883.42	798.827	748.858	785.691	612.241	735.568	646.506	509.259	632.117	666.765	405.63	378.432	452.309	559.259	445.074	469.259	410.012	439.037	515.568	1323.53	1064.11	791.975	800.086	744.747	872.63	807.679	800.864	761.704	1809.92	793.988	1134.02	1086.62	576.494	571.062	587.358	667.506	802.938	622.975
Chr1	1876814	1878148	promoter	0.133656	1105.83	839.63	1357.72	1418.52	1253.64	1063.16	1444.39	1326.63	1375.06	1411.07	1168.26	1314.05	1166.8	1823.48	1777.74	1611	1508.91	2375.77	1780.66	1965.67	1637.62	1284.69	1619.53	1671.36	1825.58	1576.57	1286.86	1431.35	1082.64	978.71	955.099	1201.44	1129.51	1310.23	1234.56	1219.58	853.741	1104.93	952.117	1074.72	1056.14	1099.65	1470.56	1532.13	1641.77
Chr1	1878427	1879996	enhancer	0.168289	948.179	762.667	2018.25	1882.23	2062.64	1428.4	1412.43	1527.94	1883.78	1683.66	1676.74	1970.78	1426.07	1666.05	1882.94	1264.83	1344.21	1857.25	1959.25	1730.79	1173.01	1224.16	1176.42	1187.81	1171.73	1191.92	2118.05	2774.7	1286.73	1854.02	1981.75	1766.48	1396.77	1325.64	1371.08	915.914	867.259	1224.25	711.975	1101.96	1301.51	1236.25	729.988	748.469	910.599
Chr1	1880558	1881187	enhancer	0.281202	76.0802	87.716	183.469	234.253	193.741	192.488	198.074	182.086	238.963	206.778	224.309	254.988	298.185	166.79	173.352	213.957	238.765	145.395	362.691	209.753	168.08	174.216	127.309	133.679	109.648	176.71	683.778	853.932	485.247	575.136	553.469	750.58	532.58	581.364	526.778	653.272	295.753	341.407	419.198	453.494	526.802	483.074	132.889	159.099	204.056
Chr1	1882431	1883110	promoter	0.205596	561.877	435.759	511.586	593.827	605.235	598.728	560.407	580.716	687.543	601.914	612.222	638.284	620.877	704.531	929.617	840.525	866.216	939.506	825.938	932.136	909.753	671.062	696.099	814.889	761.395	746.796	887.84	988.778	809.185	739.241	623.414	1258.62	1002.95	1030.36	1031.72	696.247	479.309	575.889	560.364	694.827	758.247	765.259	853.889	881.914	910.599
Chr1	1884293	1885136	enhancer	0.238837	571.519	372.216	573.944	511.377	501.728	522.765	511.222	456.901	593.802	596.488	514.815	560.383	458.654	1094.49	1082.06	650.741	709.259	1172.01	1165.1	1201.44	730.142	555.21	906.383	964.327	909.525	923	481.568	660.494	569.778	493.16	505.16	747.012	614.741	571.265	614.247	633.667	374.352	501.58	373	443.938	486.148	460.704	724.895	674.296	722.142
Chr1	1887530	1889394	enhancer	0.191007	1781.17	1437.32	2463.32	2490.37	2309.08	1866.25	2021.2	1998.18	1988.73	2103.36	1829.36	1861.72	1629.2	1811.79	1925.75	2550.99	2599.85	2810.48	1931.57	2042.86	2677.79	1660.49	2230.37	2196.78	2604.32	2122.36	1754.41	1901.28	2514.05	1801.36	1910.52	2158.14	2151.86	2507.7	2264.22	2558.69	1711.95	2126.46	1757.72	1804.47	1812.6	1694.36	2343.93	2543.48	2325.33
Chr1	1890151	1890582	promoter	0.304834	187.926	204.765	376.889	441.796	411.111	199.37	250.407	222.741	265.302	293.488	300.13	300	241.963	350.679	304.642	234.741	217.87	298.704	346.247	307.148	232.111	156.494	313.469	270.093	242.883	283.605	194.79	232.617	245.358	229.512	215.525	299.062	215.167	248.031	227.049	263.864	122.593	151.556	125.716	212.63	266.975	176.444	440.031	470.414	574.049
Chr1	1890857	1891747	enhancer	0.260344	512.148	476.778	811	835.827	701.42	574.58	535.802	678.772	671.988	653.79	823.852	774.975	703.667	949.531	851.833	519.37	542.753	523.099	627.512	557.333	497.833	557.444	889.679	613.568	605.914	574.66	389.864	475.506	452.556	468.537	622.605	439.062	243.432	292.765	292.778	281.062	202.901	260.321	211.333	171.333	156.586	141.889	765.765	687.914	582.84
Chr1	1893901	1894677	promoter	0.186035	543.84	478.809	577.556	766.963	722.278	581.136	697.543	688.123	699.086	675.611	542.111	602.401	634.951	385.741	488.235	825	790.802	543.272	436.938	434.852	810.815	591.074	747.432	581.111	584.407	801.704	707.765	663.148	671.494	571.321	634.148	752.864	660.821	684.13	634.086	722.568	459.265	549.685	359.735	678.296	719.198	713.111	606.185	655.815	574.049
Chr1	1896714	1897433	promoter	0.205341	498.198	447.926	373.012	375.87	409.648	499.049	506.537	520.296	608.16	511.605	568.407	511.975	480.852	590.099	483.716	428.617	494.914	543.272	553.846	563.667	437.395	410.352	585.802	657.753	728.741	805.099	599.265	526.432	515.753	482.414	397.593	552.123	421.623	438.222	427.784	668.852	361.556	513.272	406.981	446.457	469.426	421.691	675.012	706.481	730.654
Chr1	1899294	1900332	promoter	0.200786	530.012	531.926	616.395	728.123	676.494	756.716	706.846	753.086	751.759	670.778	737.642	723.593	704.889	500.148	507.259	730.654	715.568	427.71	401.222	459.321	729.704	502.154	602.815	552.16	650.426	481.457	572.043	620.877	696.173	606.796	630.16	692.951	563.975	590.025	547.685	801.395	429.84	539.438	408.29	726.414	754.599	687.864	656.574	748.136	614.963
Chr1	1904890	1905958	promoter	0.226826	376.617	383.117	597.185	492.574	561.154	492.833	465.765	510.173	389.34	442.136	461.383	686.469	478.302	1014.16	908.16	449.963	435.086	1540.63	1213.7	1360.02	438.444	410.352	1346.35	1164.89	1020.22	893.136	178.253	163	307.099	258.481	294.821	137.556	147.198	136	147.333	198	252.617	170.654	235.877	90.6543	132.049	159.407	268.358	244.932	243.13
Chr1	1906780	1907358	promoter	0.298099	175.654	202.037	145.346	162.444	184.778	226.864	215.519	213.914	258.358	207.426	180.235	209.198	182.938	222.79	287.951	141.148	160.623	337.469	296.574	386.852	182.457	106.617	250.852	315.562	249.519	283.605	168.136	161.216	165.21	177.111	175.327	208.679	169.481	167.272	214.284	163.815	130.679	166.617	131.438	161.346	146.605	155.877	342.383	338.728	386.315
Chr1	1910505	1911445	promoter	0.258457	366.957	397.222	522.198	430.698	436.815	355.296	401.006	375.395	346.105	326.747	368.623	371.377	414.784	391.988	333.531	426.025	494.914	416.667	415.889	434.852	428.63	333.66	404.012	384.247	409.136	377.346	281.383	255.938	336.877	339.167	459.395	355.673	304.049	317.278	319.457	442.988	282.179	359.617	355.728	319.198	280.099	362.352	472.901	432.877	367.617
Chr1	1919436	1919729	promoter	0.290875	64.9444	77.0123	114.519	75.5494	103.994	77.3086	83.3148	77	70.9012	78.1481	90.5926	86.6543	96.4321	59.5617	65.0679	72.4691	90.3889	89.8025	83.1728	81.1111	77.6235	60.2222	91.142	95.1852	128.191	76.4568	81.679	77	64.8889	77.6543	54.7778	84.7901	68.5556	69.6605	72.6049	125.037	56.1358	47.4815	52.4691	57.9938	85.6296	59.7284	123.074	101.358	87.8148
Chr1	1921796	1922648	promoter	0.147521	625.037	605.154	587.062	736.278	650.204	648.759	708.395	621.494	657.852	660.821	517.012	703.58	577.358	456.21	718.432	985.543	1006.67	782.932	951.42	736.296	1032.81	840.753	749.796	826.475	857.605	834.679	547.599	595.852	727.432	664.605	664.074	767.802	743.111	807.765	677.123	766.222	489.123	630.963	492.185	870.63	735.704	711.216	928.623	791.667	705.716
Chr1	1926209	1926895	promoter	0.23993	247.753	274.981	280.944	246.086	243.358	314.815	371.617	306.981	368.988	378.704	361.29	344.265	302.741	612.488	433.778	332.16	347.87	884.926	478.586	657.333	367.167	293.488	543.099	535.654	566.79	548.438	257.42	272	289.074	295.136	289.852	298.16	300	308.247	317.494	233.198	150.537	274.605	273.772	222.358	264.79	271.778	637.216	675.673	674.154
Chr1	1932649	1933551	promoter	0.250832	262.759	315.352	560.556	583.049	522.099	396.796	405.525	410.728	394.969	375.025	351.247	435.568	255.086	541.383	441.265	439.395	470.488	553.574	415.889	473.025	510.691	310.494	561.099	502.889	451.444	443.148	395.901	378.025	444.333	339.167	418.198	334.815	484.944	525.963	518.568	368.753	235.716	245.716	227.284	470.179	432.111	505.642	637.216	648.914	771.765
Chr1	1934163	1934855	promoter	0.303939	55.2346	95.3086	70.284	134.259	137.79	86.0864	119.29	121.5	94.4321	134.278	92.8889	100.623	75.216	151.765	152.426	121.117	145.741	118.185	72.8519	167.568	102.142	87.8519	153.377	155.667	156.21	136.765	130.198	134.253	288.765	191.66	265.457	248.63	239.63	303.228	267.691	377.969	154.296	172.123	172.562	164.673	235.049	179.728	240.642	246.877	297.321
Chr1	1940374	1940779	promoter	0.304639	38.4198	19.4815	63.6111	108.34	63.8272	74.6235	69.9568	77	104.543	82.4506	98.1481	62.4568	64.3951	59.5617	43.6667	78.7778	57.4198	36.7284	72.8519	37.7593	113.37	123.735	69.5802	65.4938	67.8827	67.5926	227.895	238.358	187.901	114.395	105.173	127.407	265.568	278.926	311.198	201.012	100.784	94.7407	168.136	238.63	229.123	192.296	77.3827	87.5802	127.198
Chr1	1941309	1943203	enhancer	0.281916	244.778	192.642	448.827	471.315	380.469	290.37	313.969	415	277.136	302.327	294.309	329.957	349.086	469.426	437.63	307.673	298.16	349.333	385.975	255.049	253.049	281.58	312.247	308.698	261.222	394.988	853.111	959.568	839.037	446.383	487.802	433.198	726.469	805.728	869.506	892.765	741.395	883.531	609.716	894.611	932.136	807.63	734.901	678.457	877.08
Chr1	1945989	1947175	promoter	0.160333	533.691	561.049	583.642	609.451	555.241	479.494	520.63	627.16	569.531	524.512	608.512	597.321	553.753	406.185	552.383	494.481	521.358	438.58	457.951	521.074	535.778	552.778	524.469	508.407	448.568	604.154	749.062	711.531	690.068	588.741	556.123	658.901	594.765	698.599	588.975	1169.06	624.463	639.599	465.975	576.494	612.679	605.21	1775.17	1784.69	1789.15
Chr1	1950443	1950954	enhancer	0.301784	244.778	175.111	169.247	203.833	276.914	257.469	319.84	273.926	358.765	304.66	273.704	285.525	233.519	299.062	287.951	168.136	155.988	260.167	230.852	215.42	178.685	153.722	260.716	215.654	205.568	180.71	322.698	381.92	239.099	247.802	201.907	209.34	296.043	361.451	313.648	453.16	230.407	311.37	363.309	225.772	296.204	271.778	349.21	306.111	342.222
Chr1	1952572	1954950	promoter	0.223345	5212.67	3552.13	4262.13	4382.46	3922.21	5631.5	5717	5412.46	6638.1	5990.74	5298.74	5524.14	5409.81	3298.73	3278.63	5018.73	4730.46	2933.02	3287.02	3115.1	5873.96	4617.16	4294.94	3450.98	3652.57	4254.21	5166.22	6623.84	5425.64	4905.32	4873.05	5926.58	4835.51	5055.74	4835.51	8389.19	3927.93	4896.67	4540.52	4723.35	4532.32	4388.56	4652.06	5038.59	4502.72
Chr1	1958359	1959229	promoter	0.238507	370.84	209.605	399.321	532.654	556.401	558.932	509.728	485.957	550.833	555.753	394.432	417.938	427.679	357.815	381.667	414.296	416.605	438.58	346.247	346.049	440.827	437.926	405.926	337.617	375.358	384.099	682.84	740.012	294.988	275.395	300.506	373.5	561.426	566.173	557.747	543.099	270.988	428.383	366.827	465.414	447.951	426.284	798.358	868.383	730.654
Chr1	1963070	1963739	promoter	0.283589	178.037	133.71	241.556	256.049	293.414	187.901	181.272	203.796	223.586	236.247	185.636	150.654	173.852	97.9259	190.815	167.5	165.198	204.333	329.914	220.821	187.617	123.735	324.235	256.037	258.457	294.272	226.753	260.901	210	159.358	89.0494	275.617	192.457	182.475	187.358	169.395	181.907	144.432	184.123	177.852	174.383	189.247	496.611	519.222	386.315
Chr1	1964705	1966961	promoter	0.246551	722.543	493	831.025	857.753	702.519	822.519	835.333	948.136	853.154	902.432	811.247	807.012	786.247	699.154	828.815	842.586	790.802	832.086	775.975	823.457	811.667	719.074	723.111	677.981	731.821	874.963	955.506	684.778	469.889	498.148	470.037	597.08	621.512	731.296	682.963	659.414	690.457	733.444	561.951	1128.81	1180.67	1147.3	1039.32	914.84	1202.42
Chr1	1969210	1969911	promoter	0.281333	205.42	159.741	247.914	238.907	220.852	293.907	317.654	281.383	316.395	323.395	311.284	256.772	290.759	206.642	274.963	295.549	261.901	361.216	362.691	367.259	282.383	199.142	310.21	298.852	417.272	430.148	372.642	327.074	268.062	254.173	313.142	416.432	378.71	397.031	359.679	345.593	179.34	256.938	264.068	453.494	539.16	605.21	513.154	456.728	540.099
Chr1	1973739	1975072	promoter	0.122955	807.481	624.309	1132.31	1186.12	939.198	1065.72	931.414	1207.11	1153.75	1196.54	1003.26	1035.77	848.037	1080.03	1024.12	995.012	1020.56	895.012	791.296	839.494	1056.28	840.753	778.377	898.698	857.605	845.111	980.71	1251.44	1115.8	885.605	895.364	1336.31	1506.56	1543.12	1597.44	1381.51	610.63	898.716	934.012	1257	1314.91	1244.6	1039.32	1166.88	1448.74
Chr1	1977155	1978629	promoter	0.0986376	1650.63	1586.46	1778.88	1808.2	1575.76	2074.7	1981.88	1988.59	2101.06	2339.7	1717.77	1726.4	1796.01	2137.63	2184.34	2550.99	2489.73	2839.46	2376.28	2288.19	2689.86	1711.01	1973.68	2110.93	2361.04	1982.63	1360.39	1507.91	1906.44	1844.87	1622.17	1758.09	1791.06	1887.19	1752.92	2885.28	968.241	1137.46	1033.48	1916.16	1672.77	1799.31	1390.23	1560.85	1442.47
Chr1	1988957	1989742	promoter	0.241893	285.691	293.938	416.204	359.605	433.802	424.691	364.136	368.259	348.13	336.395	306.79	309.704	340.679	399.222	338.259	526.469	513.21	311.772	401.222	409.21	450.457	423.877	573.358	407.975	349.735	326.975	376	303.037	417.79	389.494	413.741	480.741	454.815	481.407	454.617	423.852	301.204	295.914	267.123	416.537	488.056	473.519	526.204	534.87	497.247
Chr1	1991948	1992657	promoter	0.189404	480.617	600.778	490.296	460.846	358.864	682.111	714.494	623.216	745.327	665.747	544.753	530.37	656.654	230.753	199.025	816.994	752.216	416.667	393.469	274.136	869.907	773.346	522.463	391.296	566.79	548.438	718.049	633.259	411.765	452.889	449.901	562.753	574.611	669.87	618.914	704.309	421.352	519.358	430.679	872.864	660.383	550.5	557.932	540.84	358.42
Chr1	1993334	1994378	enhancer	0.224765	178.037	187.432	291.272	235.71	183.735	163.704	204.457	203.296	187.475	202.506	162.543	166.858	211.296	166.79	258.611	166.346	192.667	204.333	268.383	326.13	142.556	137.284	416.58	245.889	258.457	165.543	217.068	163	180.148	117.481	165.025	191.691	161.963	162.673	118.975	158.704	173.605	173.352	189.111	199.185	207.679	194.975	2185	1972.79	2504.46
Chr1	1996044	1997773	promoter	0.264531	613.778	418.543	685.914	527.438	613.401	672.346	778.827	848.864	792.716	816.698	629.506	740.377	673.432	972.37	899.21	564.951	473.698	591.957	645.401	685.086	379.136	355.272	627.988	672.247	510.938	548.438	511.037	573.944	594.512	590.025	627.407	356.586	526.253	540.716	517.864	417.111	385.321	443.815	241.963	296.062	310.432	330.21	1657.42	1680.33	1891.16
Chr1	1998282	1999661	enhancer	0.176708	1004.73	567.123	831.025	697.827	865.543	848.716	1046.23	1044.63	986.222	1202.27	911.42	1049.01	862.747	1677.84	1568.06	629.556	579.833	1737.25	1795.27	1765.18	760.241	640.765	1589.43	1961.95	1875.27	1435.41	501.728	594.321	476.457	443.272	415.796	483.957	416.296	479.432	420.21	388.346	363.519	325.253	273.136	313.481	314.025	315.136	1436.27	1569.28	1898.4
Chr1	1999918	2000148	enhancer	0.302687	137.457	40.2099	154.34	114.864	148.272	107.173	114.864	106.636	155.173	136.611	109.673	84.9815	108.043	222.79	203.457	61.2531	57.4198	218.272	296.574	346.049	70.4198	92.6728	163.728	258.191	234.086	208.235	66.284	81.1111	83.7407	85.2963	71.1852	89.9259	59.8457	57.0988	41.2222	92.8395	61.5802	38.1358	70.8765	30.5926	62.3704	48.4568	98.7901	106.136	87.8148
Chr1	2000387	2002113	promoter	0.145103	1049.14	883.5	1615.58	1567.35	1231.23	1037.12	1386.58	1426.15	1296.95	1235.93	1168.26	1326.96	1131.81	1513.46	1579.14	1171.79	1214.95	1279.88	1357.46	1297.19	1164.64	898.531	1379.38	1260.58	1284.3	1326.52	1061.23	1308.16	1310.93	1116.22	1207.15	1164.64	1292.81	1281.14	1306.82	1030.84	923.426	1157.44	822.031	1027.65	1026.51	1024.04	1794.2	1667.99	1789.15
Chr1	2006809	2008050	promoter	0.240008	2549.65	2848.91	2546.6	2747.1	2342.03	3849.17	2723.35	2472.97	3024.41	2903.09	2516.91	2690.52	2696.8	3611.23	4161.91	5277.19	5180.99	6111.02	3020.09	4286.89	6329.48	4204.16	2048.9	3404.77	2604.32	1811.51	2109.37	2465.92	3167.3	2736.85	2881.48	3360.04	3103.72	3355.33	2772.17	4728.11	2020.07	2075.22	2116.22	4219.48	3873.42	3851.04	2137.85	2275.62	3158.75
Chr1	2012931	2014612	promoter	0.111677	1196.94	1045.68	1862.76	1715.95	1668.23	1582.72	1220.17	1326.63	1199.99	1193.08	1052.27	1380.48	1279.88	737.519	1005.59	1774.58	1616.63	1120.3	1001.72	982	1939.46	1532.67	1384.9	1360.22	1497.77	1428.81	1051.74	1248.19	1457.01	1436.36	1242.1	1411.17	1173.57	1227.87	1083.67	2023.06	932.735	1330.43	983.79	1174.99	1069.67	1085.47	1895.32	1898.7	1627.12
Chr1	2015872	2016447	promoter	0.294159	282.716	217.13	244.778	205.136	239.889	238.938	272.963	239.593	257.827	252.994	203.667	240.093	244.321	166.79	160.914	389.253	318.92	189.556	322.136	167.568	393.926	304.562	212.864	204.049	282.444	172.981	263.981	257.605	272.605	254.691	247.012	329.778	321.049	337.494	306.068	326.58	156.074	210.432	279.765	348.154	397.272	330.21	296.488	378.099	297.321
Chr1	2024366	2026006	promoter	0.101818	2384.04	1808.07	2176.24	2245.79	2053.93	2625.14	2417.77	2549.65	2961.74	2773.47	2330.9	2342.03	2474.59	1866.01	2013.59	2212.71	2051.52	2014.9	2234.59	2122.2	2184.05	1896.68	1863.65	1943.01	2399.36	2541.47	2359.93	2508.75	2188.83	2090.95	2057.75	2103.59	1646.9	1650.4	1838.7	2547.23	1374.99	1917.48	1587.07	1770.76	1571.42	1556.56	1408.46	1605.93	1675.19
Chr1	2027360	2028035	promoter	0.296498	350.568	422.79	380.259	380.84	450.938	446.481	557.105	562.537	637.481	609.043	526.469	444.84	582.506	254.877	317.327	425.364	421.969	286.198	362.691	416.204	478.778	380.747	619.074	399.667	401.556	373.617	493.272	526.432	361.543	362.012	332.543	425.259	358.068	393.37	336.185	432.315	295.753	314.568	224.407	456.284	483.235	466.926	500.284	571.704	630.333
Chr1	2029483	2030209	enhancer	0.239092	567.333	435.759	487.259	529.506	593.914	584.457	715.988	679.432	743.802	710.327	605.062	558.574	512.778	618.864	609.914	425.364	404.827	949.062	588.654	752.753	451.593	352.469	737.444	844.531	810.037	919.543	473.568	672.815	561.778	504.852	588.309	540.148	463.877	428.63	457.728	681.599	356.728	516.333	526.136	441.006	432.111	393.37	746.475	837.346	850.957
Chr1	2031794	2032628	promoter	0.182462	805.778	645.42	712.21	707.136	782.321	982.877	976.907	966.049	1105.52	1066.18	983.864	877.21	1102.48	764.877	815.247	829.191	750.142	756.5	1139.68	1011.9	901.247	657.852	1109.07	868.735	880.926	696.957	707.765	758.593	458.654	403.79	447.938	459.309	323.432	398.66	357.216	861.716	325.543	460.852	271.383	548.383	515.827	548.407	508.593	476.728	386.315
Chr1	2033681	2034365	promoter	0.277951	311.858	221.728	257.444	261.062	260.111	369.679	357.716	271.988	322.79	325.84	321.444	274.895	357.784	222.79	268.636	320.759	393.093	159.722	211.105	350.154	332.407	233.216	356.722	316.475	282.444	326.975	459	550.216	432.284	284.827	433.395	454.488	401.765	426	424.914	698.506	307.963	343.025	406.16	494.296	363.401	416.84	331.21	303.068	288.043
Chr1	2035075	2036047	promoter	0.20577	290.642	346.037	347	332.58	423.037	413.84	490.716	433.42	425.79	432.87	372.136	395.383	406.265	412.537	405.889	667.586	670.531	470.975	683.272	512.37	715.16	600.506	831.815	602.025	587	466.815	539	626.815	841.167	572.358	616.006	987.025	741.63	823.679	820.407	1757.24	596.111	646.765	737.84	1213.36	922.815	846.772	268.358	325.963	297.321
Chr1	2039955	2040797	promoter	0.288403	192.383	167.556	308.599	353.148	320.222	226.864	330.988	298.185	303.883	302.327	249.111	223.056	269.654	90.1605	233.753	377.969	401.142	286.198	313.667	321.321	387.889	238.383	197.852	272.895	382.926	439.543	291.846	238.358	328.852	275.395	216.377	341.185	343.765	323.531	325.037	636	158.994	224.877	141.778	212.63	310.432	309.012	308.932	341.049	350.272
Chr1	2046685	2048185	promoter	0.152442	483.617	468.21	683.222	709	567.222	542.778	449.932	516.753	444.062	442.136	383.673	406.185	442.784	254.877	398.463	986.222	930	416.667	370.42	346.049	927.358	768.488	581.049	455.105	451.444	477.92	624.006	568.877	1258.7	790.531	838.747	1147.12	904.346	1057.74	908.086	2654.01	881.37	1024.98	1075.16	774.728	837.309	677.34	902.006	929.481	648.556
Chr1	2048776	2049902	enhancer	0.274654	124.802	131.148	287.988	276.827	217.383	197.988	193.191	210.457	144.568	160.284	161.296	126.327	134.259	129.056	163.019	279.66	234.765	159.722	147.123	240.043	227.951	162.877	280.648	246.963	192.512	192.593	369.426	232.617	630.679	335.377	278.741	455.951	219.185	258.617	258.148	1282.1	676.043	588.833	813.198	316.321	304.716	243.784	260.321	247.321	204.056
Chr1	2051875	2052658	promoter	0.218652	497.247	422.79	511.586	516.21	572.988	449.37	431.877	392.198	464.469	432.056	424.531	332.08	369.333	635.765	666.272	601.957	554.735	895.012	797.296	706.506	643.272	415.383	487.716	516.914	632.247	656.901	348.154	360.951	675.383	577.136	556.469	662.827	519.167	578.16	524.765	812.469	299.062	504.747	416.605	472.457	517.444	480.914	683.667	737.043	713.494
Chr1	2055007	2056322	promoter	0.13384	573.148	523.864	1173.17	1047.62	1054.19	765.13	737.58	709.716	632.698	723.469	707.136	790.123	633.296	1028.11	1004.3	904.772	1020.56	1044.22	1052.86	884.704	999.741	693.395	1071.2	1028.39	899.469	929.049	521.333	603.549	1071.98	941.383	1073.72	815.346	834.531	917.29	964.42	875.099	502.599	677.778	530.105	580.926	669.056	580.469	1570.67	1541.81	1383.89
Chr1	2060330	2060734	promoter	0.297019	85.963	66.9506	55.4815	67.0617	58.5802	95.7654	92.7284	95.0494	112.543	91.4506	90.5926	109.136	96.4321	82.4321	109.358	67.6543	62.6914	174.63	221.21	130.37	47.4444	62.9259	110.42	87.8272	67.8827	128.475	53.963	56.5185	121.265	105.605	110.34	67.5556	72.5556	54.4506	86.2037	109.198	61.5802	90.3086	96.8889	98.4568	77.9877	59.7284	157.241	118.235	139.444
[truncated: 28,145 more rows]
[truncated: 20 more columns]

## Sheet: Table S6
Supplementary Table 6: GO analysis of tissue-specific regulatory elements.
Cluster	﻿GO_acc	term_type	Term	p-value	FDR
[truncated: 218 more rows]

## Sheet: Table S7
Supplementary Table 7: Histone modification ChIP-seq experiments used for ChromHMM analysis.
[truncated: 252 more rows]

[truncated: 1 more sheets: Table S8]
